# Supplementary material for: The Escherichia coli transcriptome mostly consists of independently regulated modules
Source: PubMed Central journal article supplement (PMC6892915; doi:10.1038/s41467-019-13483-w), 2019-12-04
Supplement: 41467_2019_13483_MOESM1_ESM.pdf [file 41467_2019_13483_MOESM1_ESM.pdf]

## Supplementary Information

### The *Escherichia coli* Transcriptome Mostly Consists of Independently Regulated Modules

**Authors:** Anand V. Sastry, Ye Gao, Richard Szubin, Ying Hefner, Sibe Xu, Donghyuk Kim, Kumari Sonal Choudhary, Laurence Yang, Zachary A. King, Bernhard O. Palsson

#### Table of Contents:

|                                                                                                                 |           |
|-----------------------------------------------------------------------------------------------------------------|-----------|
| <b><i>Supplementary Figures</i></b> .....                                                                       | <b>2</b>  |
| <b>Supplementary Figure 1: Summary of data</b> .....                                                            | <b>2</b>  |
| <b>Supplementary Figure 2: Overview of i-modulons</b> .....                                                     | <b>3</b>  |
| <b>Supplementary Figure 3: Validation of i-modulon-regulator relationships</b> .....                            | <b>4</b>  |
| <b>Supplementary Figure 4: Additional properties of i-modulons</b> .....                                        | <b>5</b>  |
| <b>Supplementary Figure 5: Significance thresholds for components and differential activity</b> .....           | <b>6</b>  |
| <b>Supplementary Figure 6: Descriptive characteristics of the EvgA i-modulon with explanations</b>              | <b>7</b>  |
| <b><i>Supplementary Notes</i></b> .....                                                                         | <b>8</b>  |
| <b>Supplementary Note 1: Overview of i-modulons</b> .....                                                       | <b>8</b>  |
| <b>Supplementary Note 2: Explanation of ALE-derived i-modulons</b> .....                                        | <b>21</b> |
| <b><i>Supplementary Methods</i></b> .....                                                                       | <b>22</b> |
| <b>Automated characterization of i-modulons</b> .....                                                           | <b>22</b> |
| <b>Motif Search</b> .....                                                                                       | <b>23</b> |
| <b><i>Supplementary Tables</i></b> .....                                                                        | <b>24</b> |
| <b>Supplementary Table 1: Overview of i-modulons derived from PRECISE</b> .....                                 | <b>24</b> |
| <b>Supplementary Table 2: ChIP-exo binding sites for MetJ</b> .....                                             | <b>27</b> |
| <b>Supplementary Table 3: ChIP-exo binding sites for CysB</b> .....                                             | <b>28</b> |
| <b>Supplementary Table 4: Computationally-detected novel TF binding sites upstream of i-modulon genes</b> ..... | <b>30</b> |
| <b>Supplementary Table 5: I-modulon membership for uncharacterized genes</b> .....                              | <b>34</b> |
| <b>Supplementary Table 6: Mutated regulators in evolved strains</b> .....                                       | <b>38</b> |
| <b>Supplementary Table 7: Genes in the BW25113 i-modulon</b> .....                                              | <b>39</b> |
| <b>Supplementary Table 8: Primers used in this study</b> .....                                                  | <b>40</b> |
| <b><i>Supplementary References</i></b> .....                                                                    | <b>41</b> |

## Supplementary Figures

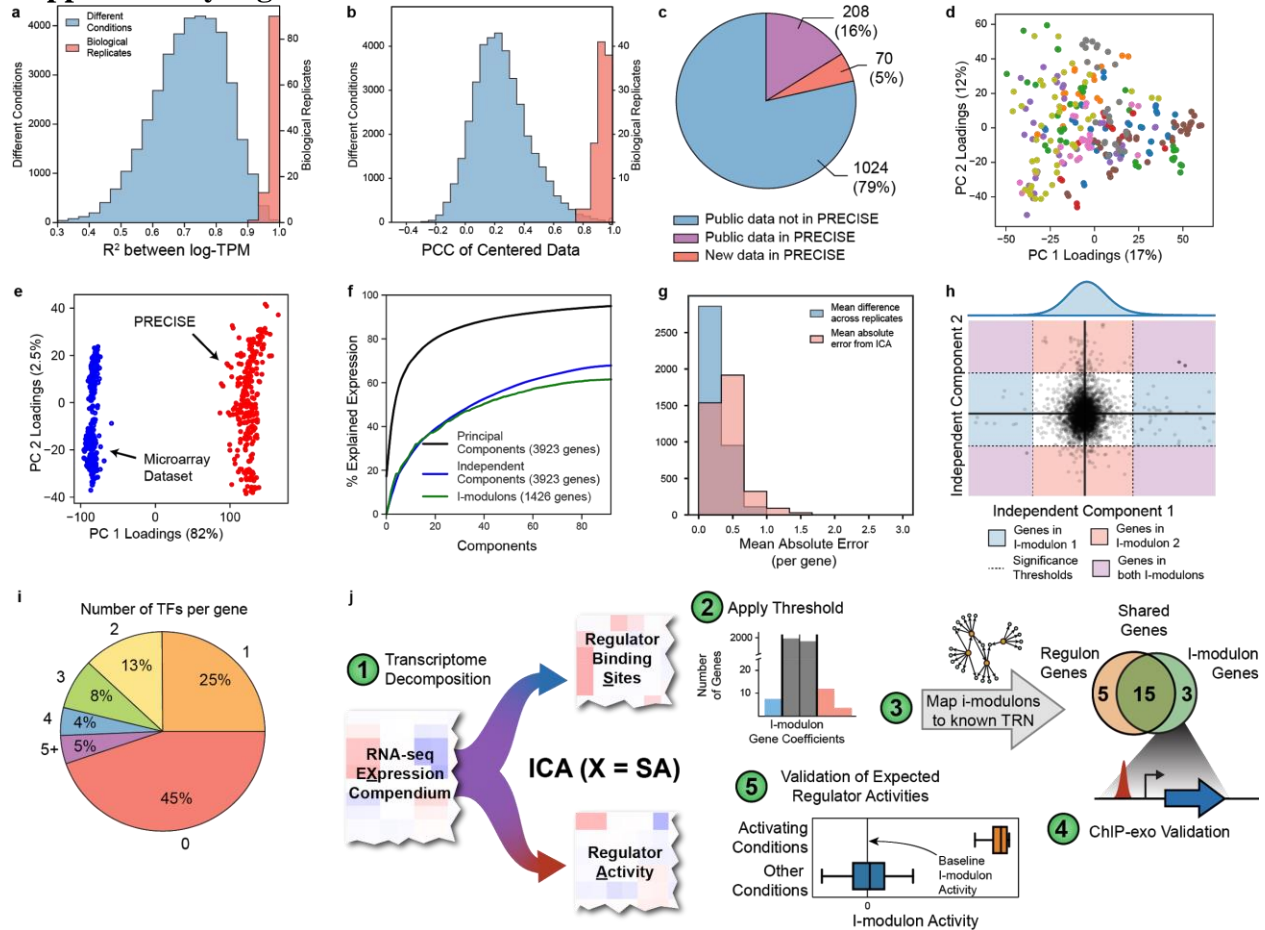

### Supplementary Figure 1: Summary of data

(a) Histogram of data quality, as measured by the coefficient of determination ( $R^2$ ) between log-TPM. Comparison between biological replicates are shown in red, whereas comparison between all pairwise non-replicates are shown in blue. (b) Histogram of the Pearson correlation coefficient (PCC) between log-TPM, after centering via subtraction of a reference condition (See Methods). (c) Pie chart of all published RNA-seq data for *E. coli* MG1655 or BW25113 on NCBI GEO as of January 2019. (d) Loadings of the first two principal components (PC) of PRECISE, colored by the researcher who created the dataset. The high overlap of various colors demonstrates the self-consistency of the compendium. (e) Loadings of the first two principal component of PRECISE merged with a microarray dataset<sup>1</sup>, illustrating the clear batch effects introduced by integrating data from different sources. (f) Cumulative explained variance for the first 92 components calculated by principal component analysis (black) and ICA (blue). Cumulative explained variance using only significant genes in each i-modulon is shown in green. (g) Histogram of mean absolute difference between log-TPM values in the original expression matrix compared to mean absolute error between the original expression matrix and the reconstructed matrix ( $\mathbf{X}-\mathbf{SA}$ ) (h) Scatterplot of two independent components, illustrating statistical independence. Given any value of independent component 2, the distribution of values across independent component 1 will be nearly identical to the distribution displayed above the plot. Thus, the coefficient of a gene in independent component 1 does not depend on the coefficient of the gene in independent component 2. The plot also illustrates that a gene may be significant in multiple components, and therefore a member of multiple i-modulons. (i) Distribution of TF connectivity in *Escherichia coli* using interactions from all confidence levels in RegulonDB v10.0<sup>2</sup>. The pie chart indicates the fraction of genes that are regulated by the indicated number of TFs. (j) Schematic illustration of data processing pipeline. Validation steps (4 and 5) are discussed in the results section “Validation of I-modulon-Regulator Relationships”.

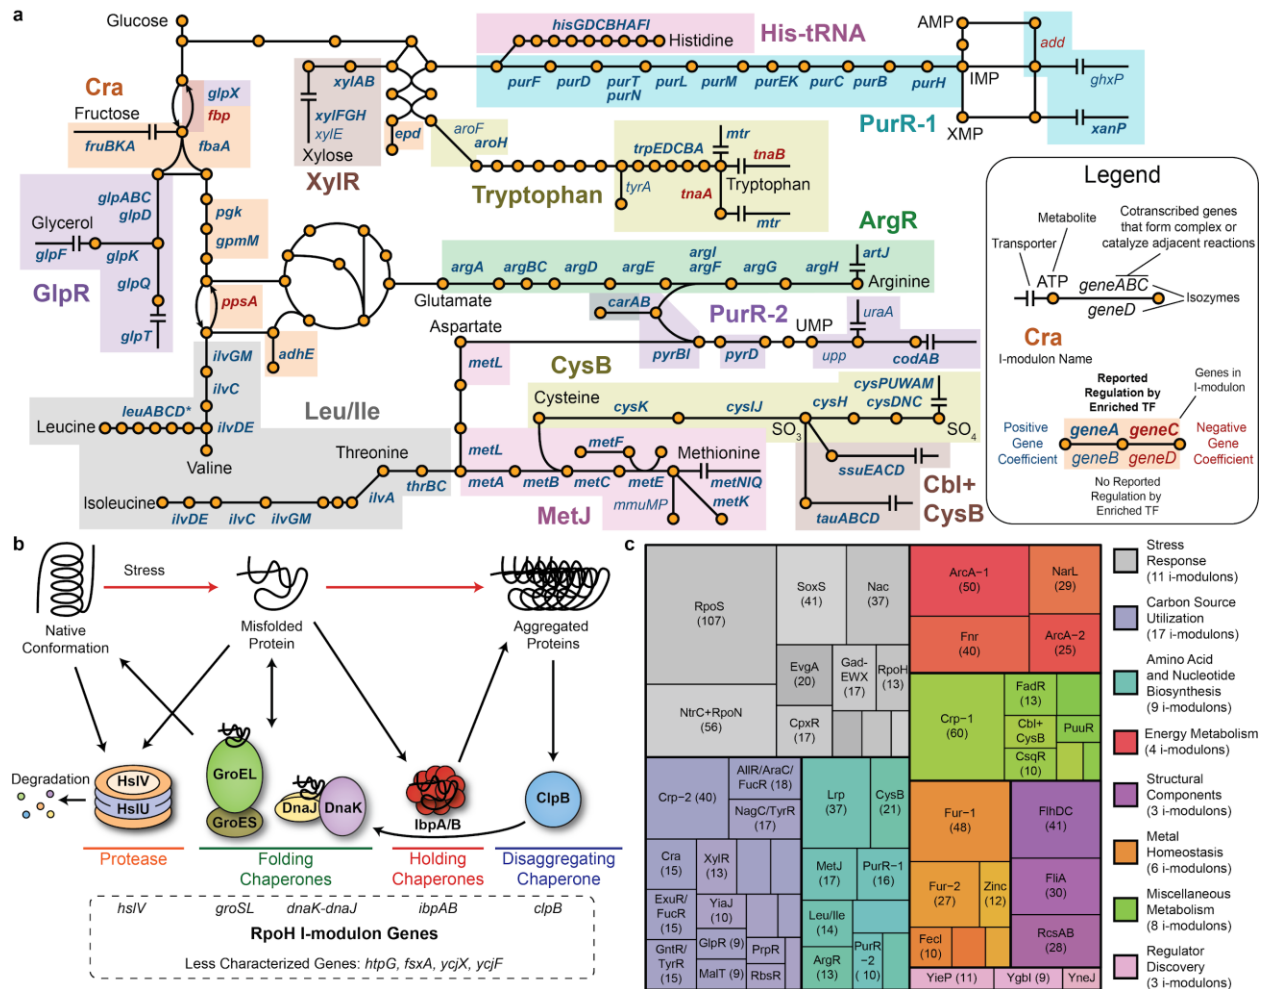

### Supplementary Figure 2: Overview of i-modulons

(a) Schematic illustration of metabolic pathways captured by 12 regulatory i-modulons. Gene names within a colored box are members of the corresponding i-modulon. Co-transcribed genes whose products form a complex or catalyze adjacent reactions share gene names (e.g., *trpEDCBA*), and isozymes (i.e., enzymes that catalyze identical reactions) share reaction lines (e.g., *glpABC/glpD*). Genes with positive i-modulon weights are colored blue, and genes with negative weights are red. Bold font indicates that the genes belong to the associated regulon. (b) Simplified schematic illustration of the protein misfolding response in *E. coli* emphasizing genes in the RpoH i-modulon. Adapted from Baneyx and Mujacic, 2004<sup>3</sup>. (c) Illustration of the 61 regulatory i-modulons, colored by functional category. Number of genes in each i-modulon are indicated by the size of the box.

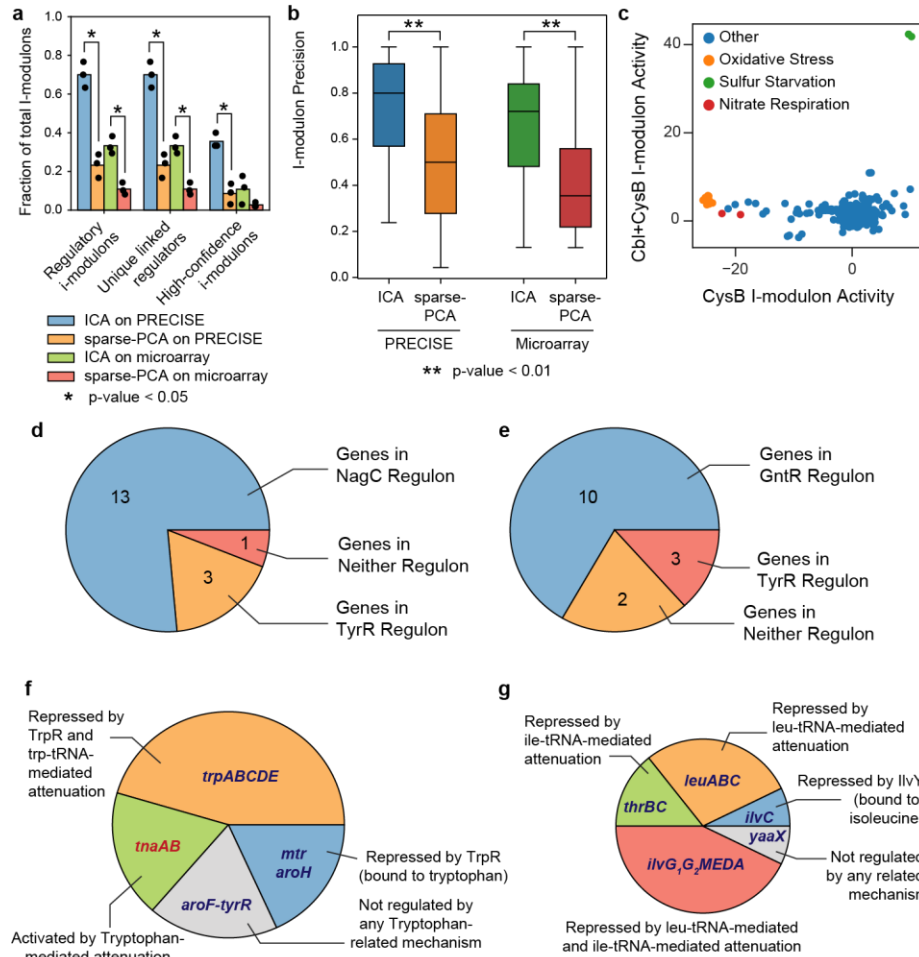

### Supplementary Figure 3: Validation of i-modulon-regulator relationships

(a) Evaluation of ICA and sparse-PCA on PRECISE and a microarray dataset (NCBI GEO GSE6836)<sup>1</sup>. ICA consistently outperforms sparse-PCA ( $p$ -value  $< .05$ ) in number of regulatory i-modulons, unique linked regulators, and high-confidence i-modulons (precision  $> 0.5$ , recall  $> 0.25$ ). (b) The precision of ICA-derived i-modulons are higher than sparse-PCA-derived i-modulons for both datasets ( $p$ -value  $< .01$ , Mann-Whitney U test). Boxplot whiskers represent extrema of data, box bounds represent upper and lower quartiles, and center-line represents the median value. (c) Scatterplot of CysB i-modulon activities against Cbl+CysB i-modulon activities. The Cbl+CysB i-modulon was only active under sulfur starvation conditions. (d) Distribution of gene regulation in the combined NagC/TyrR i-modulon. (e) Distribution of gene regulation in the combined GntR/TyrR i-modulon. (f) Distribution of tryptophan-related regulatory mechanisms in the TrpR i-modulon. Gene names in blue indicate positive gene coefficients, and gene names in red indicate negative gene coefficients. (g) Distribution of leucine- and isoleucine-related regulatory mechanisms in the Leu/Ile i-modulon. High concentrations of leucine or isoleucine either charge tRNAs that pause transcription to form termination loops, or activate the transcription factor IlvY to repress transcription of *ilvC*. Subscripts indicate pseudogene fragments.

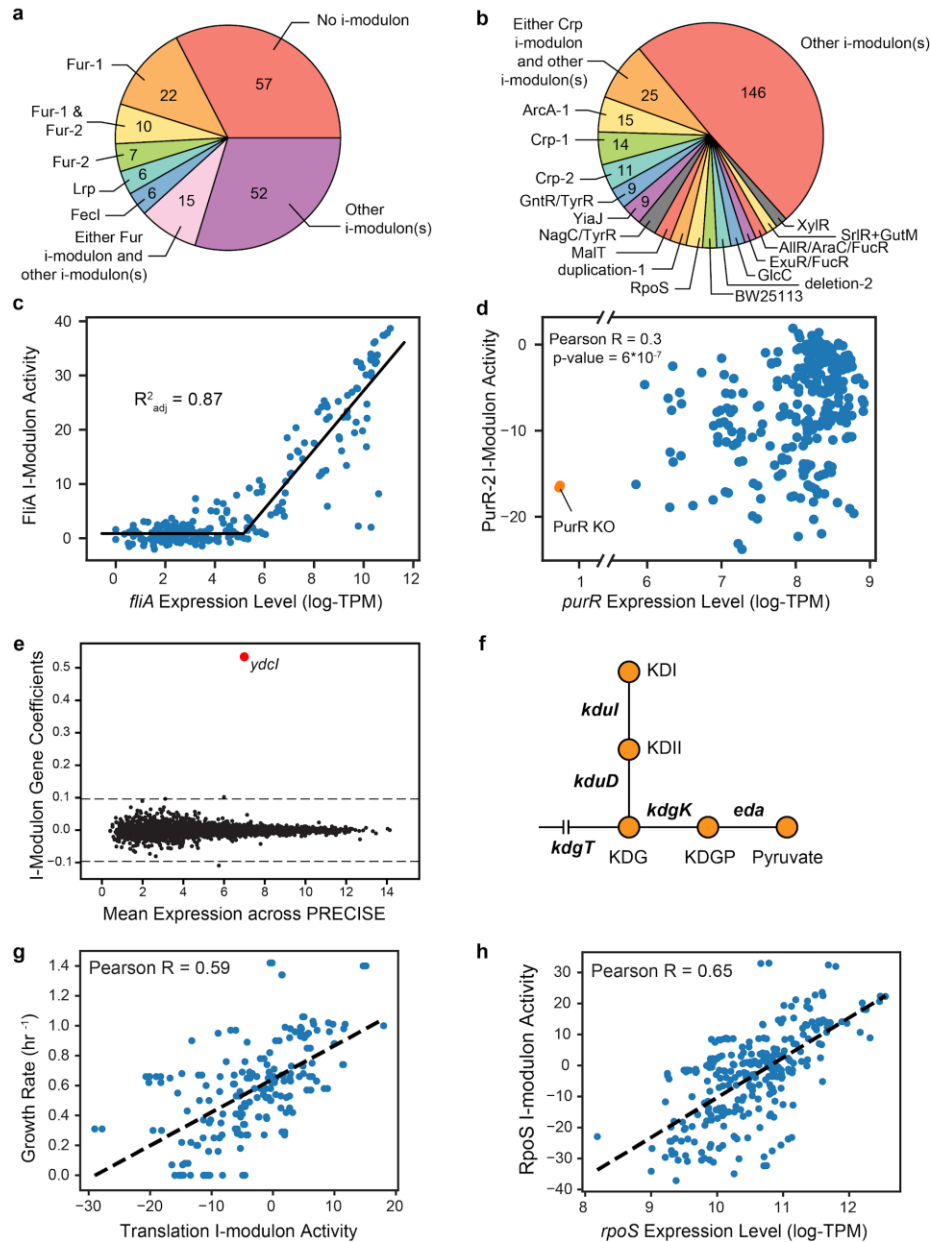

#### Supplementary Figure 4: Additional properties of i-modulons

(a,b) I-modulon composition of the reported Fur and Crp regulons. 291 genes in the reported Crp regulon were not in any i-modulon and are not shown. (c) The FliA i-modulon activity level was highly correlated with the log-transformed *fliA* expression level above a certain expression level. See methods for explanation of the adjusted  $R^2$  value. (d) Unlike the PurR-1 i-modulon, the PurR-2 i-modulon activity level was poorly correlated with *purR* expression. (e) Example of a genomic i-modulon, activated when *ydcl* is knocked-out. (f) Metabolic pathways related to KDG degradation. Gene names are shown in bold adjacent to the reaction they catalyze. Metabolite abbreviations are: KDG - 2-dehydro-3-deoxy-D-gluconate; KDGP - 2-dehydro-3-deoxy-D-gluconate 6-phosphate; KDII - 3-deoxy-D-glycero-2,5-hexodiulosonate; KDI - 5-dehydro-4-deoxy-D-glucuronate. (g) The Translation i-modulon activity level was correlated with growth rate. (h) The RpoS i-modulon activity level was correlated with *rpoS* gene expression.

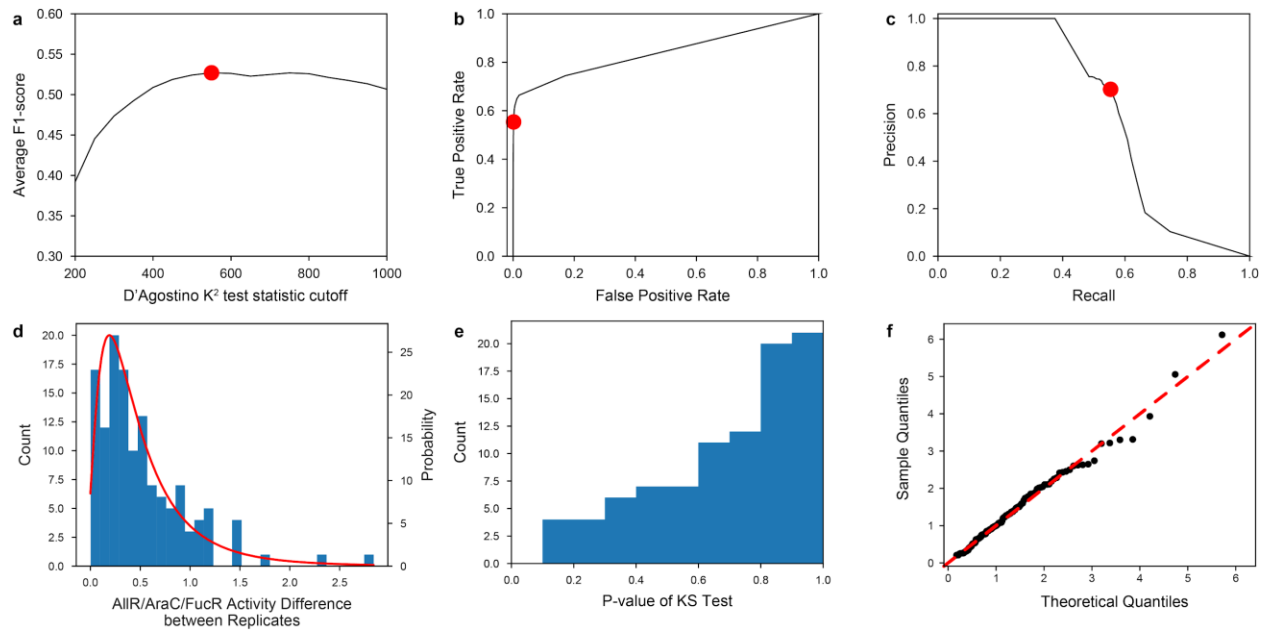

### Supplementary Figure 5: Significance thresholds for components and differential activity

(a) Sensitivity analysis on the D'Agostino  $K^2$  test statistic cutoff. Red dot indicates optimal value. (b) Precision-recall curve and (c) receiver operating characteristic (ROC) curve from varying the cutoff. (d) The difference in ArgR i-modulon activities between biological replicates follows a log-normal distribution (shown in red). (e) P-values from K-S tests on each i-modulon are higher than 0.1, indicating that an inability to reject the null hypothesis that the activity differences between replicates are from a log-normal distribution. (f) Quantile-quantile plot of difference in AllR/AraC/FucR i-modulon activities between biological replicates provides further evidence of log-normal distribution.

# EvgA I-Modulon

Regulated by: EvgA

Biological Function: Acid and osmotic stress response

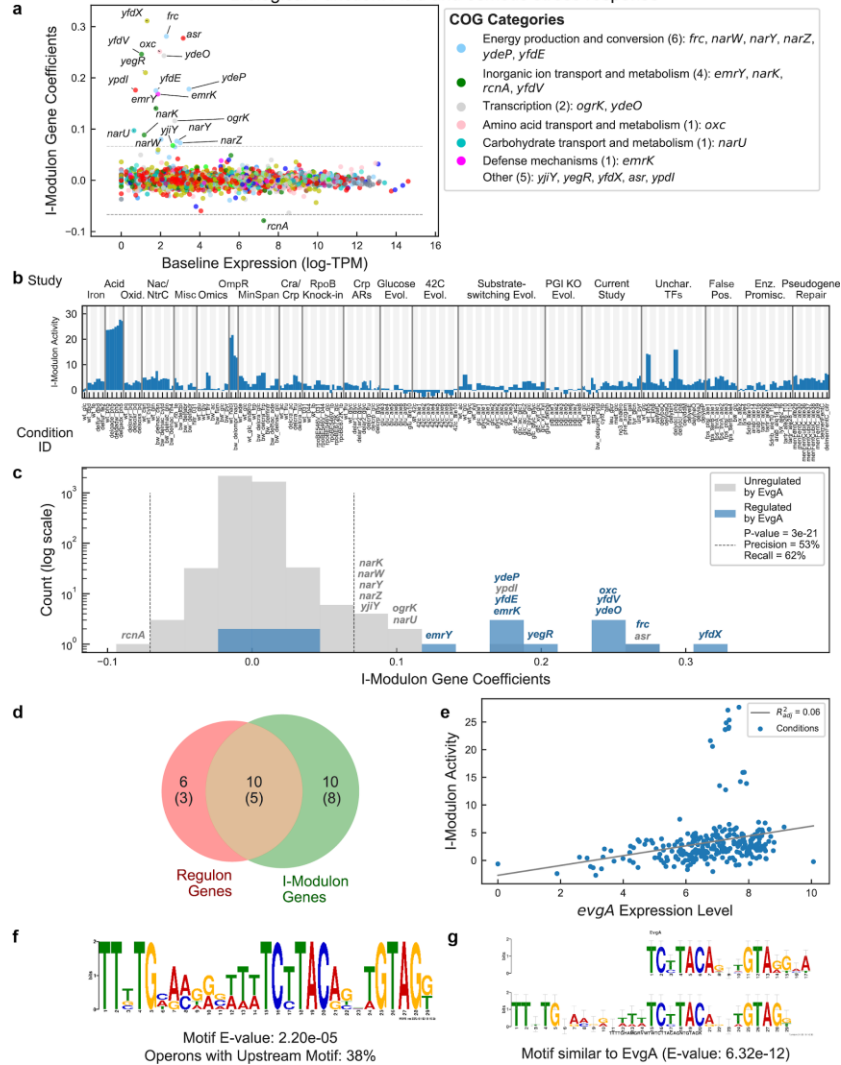

## Supplementary Figure 6: Descriptive characteristics of the EvgA i-modulon with explanations

Similar characteristics are shown for all 92 i-modulons in Supplementary Data 2. (a) Scatterplot of i-modulon gene coefficients against gene expression (log-TPM) in the reference condition (*E. coli* MG1655 grown on glucose M9 minimal medium). Genes are colored by their cluster of orthologous groups (COG) categories. (b) I-modulon activities across the entire PRECISE compendium, grouped by original study. Supplementary Data 1 contains experimental metadata (e.g. carbon source, pH, growth rate, GEO accession, etc.) for each condition ID. Each condition occupies a constant width, regardless of the number of biological replicates. (c) Histogram of i-modulon gene coefficients on a logarithmic count scale. Two histograms are overlaid, one for genes with reported regulation by the associated regulator, and one for genes without reported regulation. If multiple regulators are associated, additional histograms are overlaid. Gene names are listed above bars outside of the significance threshold (dashed vertical line). Statistics on regulator enrichment are reported in the legend. (d) Venn diagram of genes in associated regulon vs. significant genes in i-modulon. Numbers in parenthesis indicate number of operons in each category. (e) Scatterplot of i-modulon activity against expression level of associated regulator. Regulator knock-outs, if applicable, are indicated in orange. The  $R^2_{adj}$  accounts for minimum expression levels, as discussed in Supplementary Figure 4c and Methods. (f) Motif identified upstream of i-modulon genes, if found. (g) Similar motif in RegulonDB to the motif identified in (f), if found.

## Supplementary Notes

### Supplementary Note 1: Overview of i-modulons

#### AllR/AraC/FucR

**Genes:** Contains three carbohydrate uptake regulons

**Activating Conditions:** ALE strains with mutations in *araC* and *fucR*<sup>4</sup>

**Confidence:** High

#### ArcA-1

**Genes:** Primarily contains genes in energy production and conversion. Although the precision is low (66%), the ArcA motif was identified upstream of 85% of genes.

**Activating Conditions:** Downregulated in anaerobic and nitrate respiration media Conditions. Also downregulated in various ALE endpoints.

**Confidence:** Medium

#### ArcA-2

**Genes:** Contains various cytochromes and hydrogenases. These operons may have complex regulation, limiting the confidence of this regulator association.

**Activating Conditions:** Activated in anaerobic and nitrate respiration media conditions

**Confidence:** Medium

#### ArgR

**Genes:** Only contains 10% of the ArgR regulon, but contains all genes in arginine biosynthetic pathway (See Supplementary Figure 2a).

**Activating Conditions:** Strongest downregulation when grown in LB and under paraquat-induced oxidative stress. Not activated by arginine supplement.

**Confidence:** Medium

#### AtoC

**Genes:** *dmlA* is mutated in the two strains with high activity, indicating that it may not be part of the AtoC regulon. Precision increases from 67% to 80% after removing this gene.

**Activating Conditions:** Active when weaning *E. coli* from glycerol substrate to m-Tartrate substrate<sup>4</sup>. Not active after *E. coli* has evolved in response to the new substrate

**Confidence:** High

**BW25113:** See section in Paper

#### Cbl+CysB



**Genes:** Missing *ssuB* is in the *ssuABCDE* transcription unit, but falls just below threshold potentially due to expression noise. Includes *iraD*, which was not previously reported to be in the regulon, and may not have a *cysB* binding site.

**Activating Conditions:** Growth on sub-optimal sulfur source (glutathione). Consistent with published regulator activity<sup>5</sup>

**Confidence:** High

### **CdaR:**

**Genes:** *dmlA* is mutated in some strains with high activity, indicating that it may not be part of the CdaR regulon.

**Activating Conditions:** Upregulated when grown on the following carbon sources: D-glucarate (consistent with literature), D-ribose, m-tartrate, and D-arabinose.

**Confidence:** High

### **CecR**

**Genes:** Perfect concordance with known regulon.

**Activating Conditions:** Strongly upregulated in  $\Delta cecR$  ( $\Delta ybiH$ ) strain, indicating it is a constitutive repressor. Somewhat upregulated under osmotic stress (0.3M NaCl)

**Confidence:** High

### **Copper**

**Genes:** Genes are regulated by two distinct transcription factors directly activated by copper ions (CusR and CueR). HprR has an identical regulon to CueR, but senses hydrogen peroxide instead.

**Activating Conditions:** Highly variable, similar to other metal-dependent i-modulons (NikR and Zinc).

**Confidence:** High

### **CpxR**

**Genes:** Low precision (47%) and recall (13%) limits the confidence of this i-modulon. However, *cpxP* has the highest gene coefficient, and is only known to be regulated by CpxR

**Activating Conditions:** Active under osmotic stress only when OmpR is deleted. Also active in  $\Delta ybiH$  strain

**Confidence:** Low

### **Cra**

**Genes:** Glycolysis genes have positive gene coefficients, gluconeogenic genes have negative gene coefficients. Thus this i-modulon directs the direction of flux through glycolysis. The *fruABK* transcription unit contains the largest gene coefficients, indicating that its expression changes the most in response to changing Cra activity.

**Activating Conditions:** Highly upregulated when Cra is knocked-out, indicating that Cra constitutively represses glycolytic genes and activates gluconeogenic genes (consistent with literature <sup>6</sup>). Also highly upregulated when fructose is substrate, and downregulated when suboptimal carbon sources (acetate/pyruvate) are substrates.

**Confidence:** High

### Crp-1

**Genes:** 83% of genes have an upstream CRP motif

**Activating Conditions:** Upregulated when CRP activating region-II is deleted <sup>7</sup>.

**Confidence:** Medium

### Crp-2

**Genes:** Various carbohydrate uptake genes, 63% of genes have an upstream CRP motif

**Activating Conditions:** Downregulated in all strains with complete or partial CRP deletion.

**Confidence:** Medium

### CsqR

**Genes:** All genes are directly adjacent, suggesting they belong to two transcription units (*yihV-csqR* and *ompL-yihOPQRSTU*).

**Activating Conditions:** Upregulated in ALE strains containing mutations in CsqR, likely causing loss-of-function<sup>4</sup>.

**Confidence:** High

### CysB

**Genes:** CysB binding confirmed upstream of all genes in i-modulon (precision increased from 76% to 100%)

**Activating Conditions:** Strongly downregulated under nitrate respiration, paraquat-induced oxidative stress, and growth on ribose as a substrate.

**Confidence:** High

### DhaR/Mlc

**Genes:** Contains 3 phosphotransferase systems: *mtlAD*, *manXYZ*, and *ptsG*. Also contains *galP* and dihydroxyacetone kinase (*dhaKLM*).

**Activating Conditions:** Strongest activity in  $\Delta ptsI$  strains.

**Confidence:** Medium

### EvgA

**Genes:** 50% precision may be improved by additional genome-binding data.

**Activating Conditions:** Strongly upregulated by acid stress, and moderately upregulated by osmotic stress (consistent with literature<sup>8</sup>)

**Confidence:** High

### **ExuR/FucR**

**Genes:** Contains 4 y-genes of unknown function: *yagE*, *yagF*, *yeiQ*, and *yqhD*. Many of these are hypothesized to be enzymes related to glycolaldehyde metabolism.

**Activating Conditions:** Most active in arabinose tolerization ALE strains <sup>4</sup>, which have a mutation in FucR.

**Confidence:** High

### **FadR**

**Genes:** High precision (77%) and low recall (40%) may be explained by the activating condition. FabR is mutated in BW25113, which is the base strain for this knock-out, potentially affecting the rest of the regulon.

**Activating Conditions:** Upregulated in  $\Delta$ *fadR* strain

**Confidence:** Medium

### **FecI**

**Genes:** Contains various genes in addition to the known FecI regulon (*fecABCDE*), likely due to mutations or knock-outs in ALE strains with high i-modulon activities.

**Activating Conditions:** Most active when Ferric Citrate is available in the media (consistent with literature <sup>9</sup>)

**Confidence:** Medium

### **FlhDC**

**Genes:** 39/41 of genes are directly related to flagellar biosynthesis. We propose that the remaining genes (*yecR*, *ymdA*) are also related to flagellar biosynthesis.

**Activating Conditions:** Highly variable across compendium

**Confidence:** High

### **FliA**

**Genes:** Motif reminiscent of -35 and -10 box identified for *E. coli* sigma factors

**Activating Conditions:** Highly variable across compendium

**Confidence:** High

### **Fnr**

**Genes:** 82% of genes have upstream FNR motif

**Activating Conditions:** Highly variable across compendium, but never significantly lower than the reference condition (aerobic growth on glucose minimal media).

**Confidence:** Medium

### **Fur-1**

**Genes:** Fur is known to primarily repress genes. However, the negative coefficients of *sodB*, *yoeG<sub>I</sub>*, and *bfr* indicate that these genes are activated by Fur<sup>10</sup>.

**Activating Conditions:** Highly variable, but strongly upregulated (derepressed) under iron starvation conditions (consistent with literature<sup>11</sup>)

**Confidence:** High

### **Fur-2**

**Genes:** Shares 11 of 27 genes with Fur-1 i-modulon

**Activating Conditions:** Not as variable as Fur-1, but activation pattern is less clear.

**Confidence:** Medium

### **GadEWX**

**Genes:** Contains genes regulated by all three glutamate-dependent acid response regulators (*gadE*, *gadW*, and *gadX*).

**Activating Conditions:** Strongly downregulated in ALE endpoints, likely due to the fear vs. greed trade-off mentioned in the main paper. Also active under iron starvation, oxidative stress, and acid stress. Strongly downregulated in  $\Delta$ *gadE* strain, but unaltered in  $\Delta$ *gadW* and  $\Delta$ *gadX* strains, indicating that this i-modulon is *gadE*-dependent.

**Confidence:** Medium

### **GadWX**

**Genes:** Shares 6 of 8 genes with GadEWX i-modulon

**Activating Conditions:** Similar to GadEWX, except for  $\Delta$ *gadW* and  $\Delta$ *gadX* strains, indicating this response is dependent on both genes.

**Confidence:** High

### **GcvA**

**Genes:** Only one discrepancy *ygfF*, which is uncharacterized. May not be in GcvA regulon.

**Activating Conditions:** Strongest upregulation when supplemented with glycine or grown in LB. Strongest downregulation in ALE endpoint strains, iron starvation, and oxidative stress.

**Confidence:** High

### **GlcC**

**Genes:** 100% precision, only missing *glcC* indicating it may not be self-regulating.

**Activating Conditions:** Carbon-source dependent activation

**Confidence:** High

### **GlpR**

**Genes:** 100% accuracy

**Activating Conditions:** Activated when grown on glycerol, as it regulates glycerol uptake  
**Confidence:** High

### **GntR/TyrR**

**Genes:** GntR represses genes in the absence of gluconate, whereas tyrosine represses most genes (except *mtr*) in the presence of tyrosine. Thus the signs of the genes in each regulon are consistent with the underlying biology. See Supplementary Figure 3e.

**Activating Conditions:** Active on a single condition, when grown with gluconate as the carbon source and tyrosine in the media.

**Confidence:** High

### **His-tRNA**

**Genes:** The regulatory mechanism of the histidine operon was mutated in the  $\Delta serB$  ALE strains, indicating that the presence of *serB* in this i-modulon not regulation-related.

**Activating Conditions:** Highly active in  $\Delta serB$  ALE strains, where the histidine tRNA-regulatory region was mutated.

**Confidence:** High

### **Leu/Ile**

**Genes:** See Supplementary Figure 3g. High concentrations of leucine or isoleucine either charge tRNAs that pause transcription to form termination loops, or activate the transcription factor IlvY to repress transcription of *ilvC*. *yaaX* may not be a true member of the i-modulon, as its coefficient is just above the threshold.

**Activating Conditions:** Strongly upregulated under oxidative stress and iron-starvation (only WT strain, not  $\Delta fur$  strain). Strongly downregulated under osmotic stress (0.3M NaCl), or growth on LB.

**Confidence:** Medium

### **Lrp**

**Genes:** Primarily amino acid transport and metabolism. High precision (86%) and low recall (16%) is consistent with other global regulators (See Supplementary Figure 4a,b). Other genes in the Lrp regulon may belong to other i-modulons (e.g. Leu/Ile).

**Activating Conditions:** Upregulated in LB, iron starvation, and amino acid supplementation (specifically arginine, leucine, and methionine)

**Confidence:** High

### **MalT**

**Genes:** Near-perfect overlap with MalT regulon. Missing genes *malZ* and *malS* may be under more complex regulation than MalT.

**Activating Conditions:** Downregulated in all CRP mutants missing AR-1<sup>7</sup>, but upregulated in CRP mutant missing AR-2 only. Lowest activity in PGI ALE6<sup>12</sup>, which has a truncation of MalT and near-zero expression.

**Confidence:** High

### MetJ

**Genes:** ChIP-exo validation increases precision from 65% to 100%.

**Activating Conditions:** Down-regulated in presence of methionine, up-regulated under iron starvation. SNP at V46E in FPS thrA ALE2 may result in derepression of MetJ-regulated genes.

**Confidence:** High

### Nac

**Genes:** High precision (86%), low recall (6%), palindromic motif identified upstream of 72% of genes.

**Activating Conditions:** Upregulated in nitrogen starved conditions (nitrogen-limited chemostat, and non-ammonia nitrogen sources), and when cytidine is present in media. Downregulated in *Δnac* strains.

**Confidence:** High

### NagC/TyrR

**Genes:** See GntR/TyrR and Supplementary Figure 3d

**Activating Conditions:** High activity in phenylalanine/N-acetylglucosamine media. Also upregulated in ALE strains with mutations in *nagBAC*<sup>13</sup>.

**Confidence:** High

### NarL

**Genes:** Genes involved in nitrate respiration. High precision (93%) low recall (23%).

**Activating Conditions:** Upregulated when nitrate is terminal electron acceptor (*ica\_\_no3\_\_anaero*). Also upregulated in CRP mutants and various yTF deletion strains (*yafC*, *ybaO*, *yeiE*, *yheO*, *yiaJ*, *yieP*).

**Confidence:** Medium

### NikR

**Genes:** Near-perfect overlap. *yafC* may not be in regulon as it is very close to threshold.

**Activating Conditions:** Highly variable, similar to other metal-dependent i-modulons (Copper and Zinc).

**Confidence:** High

### NtrC+RpoN

**Genes:** Co-regulated by NtrC and RpoN, which are known to act together.

**Activating Conditions:** Upregulated in nitrogen starvation conditions (non-ammonia nitrogen sources and nitrogen-limited chemostats).

**Confidence:** High

### **OxyR**

**Genes:** Perfect precision, but low recall (17%).

**Activating Conditions:** Oxidative stress (except in  $\Delta oxyR$  strain), and ALE endpoints with OxyR mutations.

**Confidence:** High

### **PrpR**

**Genes:** Two hitchhikers (*ptsI* and *galP*) may be due to the ptsI-KO ALE strain.

**Activating Conditions:** Activated in ptsI-KO ALE strain, and in the enzyme promiscuity study. Also highly active when grown on galactose as a carbon source.

**Confidence:** High

### **PurR-1**

**Genes:** Genes in purine biosynthetic pathway, plus *add*, *ydhC*, and *cvpA*. *purR* is just below the significance threshold.

**Activating Conditions:** Downregulated when adenine is supplemented.

**Confidence:** High

### **PurR-2**

**Genes:** Genes in pyrimidine biosynthetic pathway. Most operons are known to be regulated by UTP-dependent reiterative transcription<sup>14</sup>, but may also be coregulated by PurR. No overlap between PurR-1 and PurR-2. Unlike other split i-modulons (e.g. Fur, GadEWX) these i-modulons seem to modulate completely different systems.

**Activating Conditions:** Lowest activity under iron starvation, oxidative stress, nitrogen starvation, growth in LB media, and cytidine supplementation.

**Confidence:** Medium

### **PuuR**

**Genes:** 100% precision and recall.

**Activating Conditions:** Upregulated when grown with ribose as a carbon source and in the *serB* KO ALE.

**Confidence:** High

### **Pyruvate**

**Genes:** This i-modulon was dominated by the pyruvate transporter gene *btsT35* and the putative pyruvate transporter gene *yhjX*. The gene coefficients were consistent with their reported

regulatory strategies; the BtsSR two-component system regulates *btsT* and contains a high-affinity pyruvate receptor, whereas the YpdAB two-component system regulates *yhjX* at lower pyruvate concentrations<sup>15</sup>. Four additional genes were regulated by the pyruvate-responsive regulator PdhR.

**Activating Conditions:** Growth on minimal media with pyruvate as the primary carbon source.

**Confidence:** Medium

### RbsR

**Genes:** High precision (83%); three genes (*purH*, *purD*, and *add*) may be incorrectly annotated as part of this regulon.

**Activating Conditions:** Growth on minimal media with ribose as the primary carbon source.

Also ALE endpoints with RbsR mutations<sup>4</sup>

**Confidence:** High

### RcsAB

**Genes:** Low precision (36%), but high recall (62%). Genes with no known rcsAB binding share similar function (capsule formation) to other genes in i-modulon, indicating that there may be many previously undetected RcsAB binding sites. In addition, rcsA is known to be degraded by *lon* protease, which is on the negative side of the i-modulon<sup>16</sup>.

**Activating Conditions:** ΔCRP strains (explains *crp* presence in i-modulon), osmotic stress (0.3M NaCl), and PGI KO ALE endpoints<sup>12</sup>. Activity level is correlated with *rcaA* (but not *rcaB*) expression levels above a threshold.

**Confidence:** Medium

### RpoH

**Genes:** 100% precision, 10% recall, significance threshold could be relaxed and still maintain precision. See Supplementary Figure 2b.

**Activating Conditions:** Variable conditions, but significantly higher when misfolded proteins are present (data not shown).

**Confidence:** High

### RpoS

**Genes:** Largest i-modulon containing over 100 genes related to stress response. Contains the catalase *katE* and pyruvate oxidase *poxB*, which are often used as a proxy for RpoS activity<sup>17,18</sup>. Although the precision and recall are low (37% and 13%, respectively), a sigma-factor like motif (e.g. -10 and -35 boxes) was found upstream of 98% of genes.

**Activating Conditions:** See Figure 5C.

**Confidence:** High

### SoxS



**Genes:** Precision and recall are medium (56% and 43%, respectively).

**Activating Conditions:** Oxidative stress, except in  $\Delta soxS$  strain.

**Confidence:** High

### **SrlR+GutM**

**Genes:** Near-perfect overlap (missing srlR and gutQ)

**Activating Conditions:** Growth on minimal media with either sorbitol or ribose as carbon sources.

**Confidence:** High

### **Thiamine**

**Genes:** 100% precision and recall, regulated by thiamine riboswitch

**Activating Conditions:** Downregulated when thiamine is present in media and in LB media.

**Confidence:** High

### **Tryptophan**

**Genes:** Regulated by combination of L-tryptophan riboswitch, tryptophan-tRNA-mediated transcriptional attenuation, and TrpR. See Supplementary Figure 3f. Tryptophan riboswitch upregulates tryptophan degradation operon *tnaABC* in the presence of tryptophan, whereas TrpR represses tryptophan biosynthetic genes in presence of tryptophan. Also includes *aroF* and *tyrA*, which are regulated by tyrosine.

**Activating Conditions:** Strong negative in presence of tryptophan (*tnaAB* are upregulated, and TrpR-regulated genes are downregulated).

**Confidence:** High

### **XylR**

**Genes:** Low precision, likely because some members of the regulon have not yet been discovered.

**Activating Conditions:** Growth on xylose and lyxose.

**Confidence:** High

### **YgbI**

**Genes:** See supplementary text and Figure 4f

**Activating Conditions:** ALE endpoints with mutations

**Confidence:** High

### **YiaJ**

**Genes:** Near perfect overlap, see Figure 4d

**Activating Conditions:**  $\Delta yiaJ$  strain, and CRP AR-II mutant strain<sup>7</sup>.

**Confidence:** High

### **YieP**

**Genes:** *yohJK*, *ykgEFG* have upstream binding sites<sup>19</sup>, unsure about other genes, see Figure 4e

**Activating Conditions:**  $\Delta yieP$  strain.

**Confidence:** Medium

### **YneJ**

**Genes:** See supplementary text and Figure 4f

**Activating Conditions:** ALE endpoint strain with mutation<sup>20</sup>

**Confidence:** High

### **Zinc**

**Genes:** Contains genes regulated by two zinc-sensing regulators (ZntR and Zur). Also contains some copper-related genes (*copA* and *cueO*).

**Activating Conditions:** Similar to other metal sensing i-modulons (Copper, NikR), i-modulon activities are fairly variable.

**Confidence:** High

### **Non-regulatory I-modulons:**

#### **crp-KO**

**Genes:** Dominated by *crp*, but also includes some unknown function genes that are known to be regulated by CRP

**Activating Conditions:** Strongly upregulated in CRP complete knock-out, but strongly downregulated in partial CRP knock-out.

#### **curli**

**Genes:** *csgDEFG* curli subunits

**Activating Conditions:** Strongly downregulated under osmotic stress

#### **deletion-1**

**Genes:** Genes in 36 kilobase deletion, plus 4 genes putatively regulated by deleted regulator KdgR. See Figure 4g.

**Activating Conditions:** Strain with 36 kb deletion<sup>4</sup>

#### **deletion-2**

**Genes:** Genes in 100 kilobase deletion, plus a few additional genes with negative coefficients

**Activating Conditions:** Strain with 100 kb deletion<sup>4</sup>

#### **duplication-2**

**Genes:** Genes in a 129-gene duplication, plus a few additional genes with negative coefficients  
**Activating Conditions:** Strain with duplication<sup>4</sup>

#### **e14-deletion**

**Genes:** e14-prophage between *icdC* and *icd*

**Activating Conditions:** CRP partial and full knockouts (presumably e14-prophage deletion occurred during strain construction), and one ALE strain (verified e14-prophage deletion)<sup>20,21</sup>.

#### **e14-repair**

**Genes:** *e14UOB*, *entEBAH*

**Activating Conditions:** *entC* deletion strains (*entC* is part of *entCEBAH* operon), one of which has a repair of the *e14U* pseudogene<sup>20</sup>.

#### **entC-menF-KO**

**Genes:** *entC*, *menF*, and *menD*

**Activating Conditions:** Strains with *entC* and/or *menF* removed

#### **fimbriae**

**Genes:** Fimbrial complex proteins, plus *thrA*, likely due to high activity in a *thrA* deletion strain.

**Activating Conditions:** Highly variable

#### **flu-yeeRS**

**Genes:** *flu-yeeRS* CP4-44 prophage genes, plus various genes likely due to deletions in strains (*fur*, *thrA*, *menF*, *entC*, *serB*)

**Activating Conditions:** Highly variable

#### **fur-KO**

**Genes:** Dominated by *fur*, but also includes some genes in the e14-prophage and DNA repair proteins (*recN*, *yebG*) indicating DNA damage during construction of strain<sup>21</sup>.

**Activating Conditions:** Fur KO strains

#### **gadWX-KO**

**Genes:** *gadW*, *gadX*

**Activating Conditions:**  $\Delta$ *gadW* and  $\Delta$ *gadX*

#### **insertion**

**Genes:** *insCD-1*, and three genes of unknown function with negative coefficients

**Activating Conditions:** ALE strain with insertion of *insCD-1*

#### **iron-related**

**Genes:** Dominated by *yjjZ* an uncharacterized gene. Also contains various genes related to iron transport, iron-sulfur formation, and oxidative stress detoxification

**Activating Conditions:** Negative activity in iron starvation, Fur KO, and oxidative stress.

### **lipopolysaccharide**

**Genes:** Contains many genes related to lipopolysaccharide biosynthesis, but no regulator is known for these genes.

**Activating Conditions:** Highly variable

### **membrane**

**Genes:** All genes are membrane-bound, but most are uncharacterized

**Activating Conditions:** Highly variable

### **nitrate-related**

**Genes:** Various genes related to nitric oxide response

**Activating Conditions:** Nitrate respiration

### **proVWX**

**Genes:** Glycine-betaine osmoprotectant transport (*proVWX*) and *kdpA* potassium ion pump subunit.

**Activating Conditions:** Osmotic stress (0.3M NaCl)

### **purR-KO**

**Genes:** *purR*, *pyrE*, and *add*. *pyrE* is likely related to the *pyrE-rph* defect<sup>22</sup>, whereas *add* is likely decoupling the regulation of *add* from PurR itself.

**Activating Conditions:** Strong negative activity on PurR KO

### **sgrT**

**Genes:** *sgrT*, plus two genes adjacent to the significance threshold. *sgrT* is a putative inhibitor of *ptsG* transporter<sup>23</sup>

**Activating Conditions:** All PGI KO ALEs<sup>12</sup>

### **thrA-KO**

**Genes:** *thrA*, and two genes adjacent to the threshold

**Activating Conditions:**  $\Delta$ *thrA* strains

### **translation**

**Genes:** Various ribosomal subunit-encoding genes and translation-related genes. Also includes two ion transporters and two energy production proteins (*zraP* has negative coefficient).

**Activating Conditions:** Correlated with growth rate (See Supplementary Figure 4g)

### **ydcI-KO**

**Genes:** *ydcI*, and two genes adjacent to the threshold

**Activating Conditions:**  $\Delta ydcI$  strains

### **yheO-KO**

**Genes:** *yheO*, and many genes adjacent to the threshold. Some genes with negative coefficients have YheO binding sites, indicating this may be a regulatory i-modulon <sup>19</sup>

**Activating Conditions:**  $\Delta yheO$  strain

### **Supplementary Note 2: Explanation of ALE-derived i-modulons**

The YgbI i-modulon contains five consecutive genes with positive coefficients (*ygbJKLMN*), two other genes with positive coefficients (*dmlA*, *glxR*), and two genes with negative coefficient (*kduI*, *araA*). Of the three strains with mutations in YgbI, two strains have a mutation upstream of *dmlA* that likely affects its expression, and one strain has a large deletion including *kdgR* (Supplementary Table 6). We hypothesized that *kdgR* was a regulator of *kduI* (Figure 4f,g), potentially explaining why *kduI* may appear in this component. Thus, only *ygbJKLMN* and potentially *glxR* are likely to be directly regulated by YgbI.

Similarly, the strain with the active YneJ i-modulon is missing the genes *entC* and *proQ* due to genome deletions, explaining their presence in this i-modulon.

## Supplementary Methods

### Automated characterization of i-modulons

Supplementary Data 2 contains detailed information on each i-modulon. Each page characterizes one i-modulon, which are sorted by name. The EvgA i-modulon page is described in Supplementary Figure 6a-g.

The scatter plot (Supplementary Figure 6a) compares the i-modulon gene weights to the reference expression profile (defined as the average log-TPM of sample IDs *control\_\_wt\_glc\_\_1* and *control\_\_wt\_glc\_\_2*). The horizontal dashed lines represent the threshold separating significant and non-significant genes in an i-modulon. Each gene is colored by its functional category, defined by clusters of orthologous groups of genes queried from EggNOG<sup>24</sup>. Gene names are provided on the scatterplot if the total number of significant genes is below 25. Subscripts indicate split genes in *E. coli* MG1655, classified as pseudogenes.

The bar chart (Supplementary Figure 6b) displays the i-modulon activities across all conditions in the database, grouped by study. Each condition shares the same total width, regardless of the number of biological replicates. The sample IDs correspond to the IDs in Supplementary Data 1.

The histograms (Supplementary Figure 6c) show the gene weights in an i-modulon on a log-scale, split by enriched regulon. The vertical bars represent the significance threshold for the component. The gray histogram captures genes that are not in an enriched regulon. The brown histogram captures genes that are in more than one enriched regulon.

The venn diagram (Supplementary Figure 6d) compares genes in an i-modulon (above the threshold) to genes in the enriched regulons. If the i-modulon name contains a slash (/), the regulon circle contains the union of genes in any enriched regulon (i.e. genes in either regulon). If the i-modulon name contains a plus sign (+), the regulon circle contains the intersection of the regulons (i.e. genes in both regulons). Numbers in parentheses indicate number of operons (complete or partial) in each category. Operons were defined using RegulonDB. This panel is hidden if no enriched regulons were identified.

The regulon scatter plot (Supplementary Figure 6e) compares the expression level of enriched regulators to the i-modulon activity. Each point represents an expression profile. Two lines were fit to each scatter plot, a simple line and a broken line. The broken line represents a minimal expression level required before a correlation is observed between the i-modulon activity and the regulator expression. Only the line with the highest  $R^2_{\text{adj}}$  is shown, where

$$(1) R^2_{\text{adj}} = 1 - (1-R^2)(n-1)/(n-k-1)$$

The broken line is modeled as:

$$(2) y = a*c + b \text{ if } x < c$$

$$(3) y = a*x + b \text{ if } x \geq c,$$

where  $x$  is the expression level of the gene encoding the TF, and  $y$  is the i-modulon activity level. Parameter  $c$  is optimized using the *optimize.curve\_fit* function in the Python *scipy* package<sup>25</sup>. Three initial values for  $c$  were tested to identify the optimal fit: minimum expression, maximum expression, and mean expression.

This panel is hidden if no enriched regulons were identified, or if expression levels were not measured for the regulator (see Thiamine i-modulon). If there are two or more enriched regulons with expression levels, the two TFs with the strongest association to the i-modulon are shown. Experimental conditions with knocked-out TFs are marked in orange and were not used to find the best-fit line.

### **Motif Search**

The motifs (Supplementary Figure 6f) were identified by searching upstream sequences using MEME<sup>26</sup>. Genes in each i-modulon were grouped into operons. A stringent upstream sequence was defined as the region from -300 to the start of the operon. We searched for zero or one motif per sequence using an E-value threshold of  $10^{-3}$ , searching for motifs with all widths between 6 and 30 basepairs, and minimum number of found motifs equal to  $\frac{1}{3}$  the total number of operons for all non-genomic i-modulons. For i-modulons with no enriched motifs in the stringent upstream sequence, we searched for motifs in a broader upstream sequence of -600 to +100, keeping all other parameters constant. The E-value of the motif and the percent of i-modulon operons with the upstream motif are listed below the motif.

The motif comparison (Supplementary Figure 6g) was generated by comparing i-modulon motifs against known motifs from RegulonDB using TOMTOM<sup>27</sup>, with an E-value threshold of 0.01 and allowing incomplete matches. The E-value of the comparison is shown below the figure.

For regulatory i-modulons, genes with identified motif sites but no known regulation by the associated TF are reported in Supplementary Table 4.

## Supplementary Tables

**Supplementary Table 1: Overview of i-modulons derived from PRECISE.**

I-modulons are either named after their associated regulator(s) or their biological function. Strong activity-TF relationships ( $R^2_{adj} > 0.4$ ) are marked in bold.

| I-modulon Name                                    | Number of Genes | Regulator(s)                                           | Enrichment P-value | Precision | Recall | Activity-TF $R^2_{adj}$     | Biological Function                                         |
|---------------------------------------------------|-----------------|--------------------------------------------------------|--------------------|-----------|--------|-----------------------------|-------------------------------------------------------------|
| <b>Amino Acid and Nucleotide Biosynthesis (9)</b> |                 |                                                        |                    |           |        |                             |                                                             |
| ArgR                                              | 13              | ArgR                                                   | 6E-18              | 0.92      | 0.10   | 0.38                        | Arginine biosynthesis                                       |
| CysB                                              | 21              | CysB                                                   | 4E-32              | 0.76      | 0.52   | 0.28                        | Inorganic sulfate assimilation                              |
| His-tRNA                                          | 9               | His-tRNA attenuation                                   | 6E-24              | 0.89      | 1.     |                             | Histidine biosynthesis                                      |
| Leu/Ile                                           | 14              | IlvY or leu-tRNA attenuation or ile-tRNA attenuation   | 4E-33              | 0.93      | 0.76   | 0.02                        | Branched-chain amino acid biosynthesis                      |
| Lrp                                               | 37              | Lrp                                                    | 1E-37              | 0.86      | 0.16   | 0.13                        | Amino acid and peptide transport                            |
| MetJ                                              | 17              | MetJ                                                   | 2E-25              | 0.65      | 0.73   | <b>0.46</b>                 | Methionine biosynthesis                                     |
| PurR-1                                            | 16              | PurR                                                   | 2E-25              | 0.81      | 0.36   | 0.23                        | Purine Biosynthesis                                         |
| PurR-2                                            | 10              | PurR                                                   | 3E-13              | 0.70      | 0.19   | 0.11                        | Pyrimidine biosynthesis                                     |
| Tryptophan                                        | 11              | TrpR or trp-tRNA attenuation or Tryptophan attenuation | 4E-21              | 0.82      | 0.5    | 0.02                        | Tryptophan Biosynthesis                                     |
| <b>Carbon Source Utilization (17)</b>             |                 |                                                        |                    |           |        |                             |                                                             |
| AllR/AraC/FucR                                    | 18              | AllR or AraC or FucR                                   | 1E-41              | 1.        | 0.6    | 0.33<br>0.38<br><b>0.48</b> | Allantoin, glyoxylate, L-arabinose, and L-fucose catabolism |
| CdaR                                              | 10              | CdaR                                                   | 2E-26              | 0.9       | 1.     | <b>0.74</b>                 | Glucarate catabolism                                        |
| Cra                                               | 15              | Cra                                                    | 7E-16              | 0.8       | 0.09   | 0.02                        | Central carbon metabolism                                   |
| Crp-2                                             | 40              | Crp                                                    | 4E-15              | 0.7       | 0.05   |                             | Various carbon source catabolism                            |
| DhaR/Mlc                                          | 11              | DhaR or Mlc                                            | 4E-19              | 0.73      | 0.57   | 0<br>0.28                   | Dihydroxyacetone kinase and phosphotransferase systems      |
| ExuR/FucR                                         | 15              | ExuR or FucR                                           | 1E-22              | 0.67      | 0.63   | 0.07<br><b>0.44</b>         | D-galacturonate and L-fucose catabolism                     |
| GlcC                                              | 6               | GlcC                                                   | 1E-18              | 1.        | 0.86   | <b>0.42</b>                 | Glycolate catabolism                                        |
| GlpR                                              | 9               | GlpR                                                   | 0                  | 1.        | 1.     | 0.02                        | Glycerol catabolism                                         |
| GntR/TyrR                                         | 15              | GntR or TyrR                                           | 3E-29              | 0.87      | 0.54   | 0<br>0                      | Gluconate catabolism and tyrosine biosynthesis              |
| MalT                                              | 9               | MalT                                                   | 3E-22              | 0.89      | 0.8    | <b>0.69</b>                 | Maltose catabolism                                          |
| NagC/TyrR                                         | 17              | NagC or TyrR                                           | 4E-31              | 0.94      | 0.33   | 0.03<br>0.01                | N-acetylglucosamine catabolism and tyrosine biosynthesis    |
| PrpR                                              | 6               | PrpR                                                   | 8E-12              | 0.67      | 0.8    | 0.36                        | Propionate catabolism                                       |
| Pyruvate                                          | 8               | BtsR or YpdB or pdhR                                   | 9E-07              | 0.50      | 0.09   | 0.04<br>0<br>0.24           | Pyruvate transport and metabolism                           |
| RbsR                                              | 6               | RbsR                                                   | 1E-13              | 0.83      | 0.56   | <b>0.64</b>                 | D-ribose catabolism                                         |
| SrlR+GutM                                         | 5               | SrlR and GutM                                          | 3E-15              | 1.        | 0.71   | 0.38<br><b>0.40</b>         | Sorbitol catabolism                                         |
| XylR                                              | 13              | XylR                                                   | 2E-15              | 0.46      | 0.86   | <b>0.83</b>                 | Xylose catabolism                                           |
| YiaJ                                              | 10              | YiaJ                                                   | 5E-29              | 1.        | 0.91   | 0.07                        | Ascorbate utilization                                       |
| <b>Energy Metabolism (4)</b>                      |                 |                                                        |                    |           |        |                             |                                                             |
| ArcA-1                                            | 50              | ArcA                                                   | 9E-20              | 0.66      | 0.07   | 0.03                        | Electron Transport Chain                                    |
| ArcA-2                                            | 25              | ArcA                                                   | 1E-16              | 0.84      | 0.05   | 0                           | Anaerobic response                                          |
| Fnr                                               | 40              | Fnr                                                    | 3E-27              | 0.85      | 0.08   | <b>0.57</b>                 | Anaerobic response                                          |
| NarL                                              | 29              | NarL                                                   | 1E-40              | 0.93      | 0.23   | 0.02                        | Nitrate respiration                                         |
| <b>Metal Homeostasis (6)</b>                      |                 |                                                        |                    |           |        |                             |                                                             |
| Copper                                            | 8               | CusR or HprR or CueR                                   | 5E-20              | 1.        | 0.42   | <b>0.76</b><br>0.25<br>0.03 | Copper homeostasis                                          |
| Fecl                                              | 10              | Fecl                                                   | 3E-14              | 0.5       | 1.     | 0.07                        | Ferric citrate transport                                    |
| Fur-1                                             | 48              | Fur                                                    | 5E-55              | 0.9       | 0.25   | 0                           | Iron homeostasis                                            |
| Fur-2                                             | 27              | Fur                                                    | 3E-26              | 0.81      | 0.13   | 0.03                        | Iron homeostasis                                            |



|                                     |     |                        |       |      |      |                                           |                                                       |
|-------------------------------------|-----|------------------------|-------|------|------|-------------------------------------------|-------------------------------------------------------|
| NikR                                | 6   | NikR                   | 5E-15 | 0.83 | 0.83 | 0.04                                      | Nickel homeostasis                                    |
| Zinc                                | 12  | ZntR or Zur            | 3E-19 | 0.58 | 1.   | 0<br>0.01                                 | Zinc homeostasis                                      |
| <b>Miscellaneous Metabolism (7)</b> |     |                        |       |      |      |                                           |                                                       |
| AtoC                                | 6   | AtoC                   | 2E-12 | 0.67 | 1.   | 0.04                                      | Acetoacetate degradation                              |
| Cbl+CysB                            | 10  | Cbl and CysB           | 3E-22 | 0.80 | 0.89 | <b>0.73</b><br>0.10                       | Aliphatic sulfonate utilization                       |
| Crp-1                               | 60  | Crp                    | 7E-10 | 0.48 | 0.05 | 0.05                                      | Miscellaneous Functions                               |
| CsqR                                | 10  | CsqR                   | 3E-14 | 0.5  | 1.   | <b>0.89</b>                               | Sulfoquinovose catabolism                             |
| FadR                                | 13  | FadR                   | 6E-19 | 0.69 | 0.41 | 0.06                                      | Fatty acid degradation                                |
| GcvA                                | 4   | GcvA                   | 2E-9  | 0.75 | 0.75 | 0.02                                      | Glycine cleavage system                               |
| PuuR                                | 7   | PuuR                   | 0     | 1.   | 1.   | <b>0.7</b>                                | Putrescine catabolism                                 |
| Thiamine                            | 11  | Thiamine               | 0     | 1.   | 1.   |                                           | Thiamine biosynthesis                                 |
| <b>Stress Response (11)</b>         |     |                        |       |      |      |                                           |                                                       |
| CecR                                | 5   | CecR                   | 0     | 1.   | 1.   | 0.08                                      | Related to antibiotic sensitivity                     |
| CpxR                                | 17  | CpxR                   | 5E-11 | 0.47 | 0.13 | 0.06                                      | Various stress responses                              |
| EvgA                                | 20  | EvgA                   | 6E-21 | 0.5  | 0.63 | 0.06                                      | Acid and osmotic stress response                      |
| GadEWX                              | 17  | GadE and GadW and GadX | 1E-24 | 0.59 | 0.91 | <b>0.92</b><br><b>0.61</b><br><b>0.66</b> | Acid stress response                                  |
| GadWX                               | 8   | GadW and GadX          | 5E-21 | 1.   | 0.53 | <b>0.68</b><br><b>0.77</b>                | Acid stress response                                  |
| Nac                                 | 37  | Nac                    | 7E-24 | 0.86 | 0.06 | <b>0.67</b>                               | Nitrogen starvation response                          |
| NtrC+RpoN                           | 56  | NtrC and RpoN          | 3E-52 | 0.57 | 0.67 | <b>0.51</b><br>0.05                       | Nitrogen starvation response                          |
| OxyR                                | 8   | OxyR                   | 2E-14 | 1.   | 0.17 | <b>0.55</b>                               | Peroxide reductases                                   |
| RpoH                                | 13  | RpoH                   | 6E-20 | 1.   | 0.1  | 0                                         | Heat shock response                                   |
| RpoS                                | 107 | RpoS                   | 1E-18 | 0.37 | 0.13 | <b>0.43</b>                               | General stress response                               |
| SoxS                                | 41  | SoxS                   | 6E-35 | 0.56 | 0.43 | <b>0.74</b>                               | Oxidative stress response                             |
| <b>Structural Components (3)</b>    |     |                        |       |      |      |                                           |                                                       |
| FlhDC                               | 41  | FlhDC                  | 5E-66 | 0.93 | 0.49 | <b>0.72</b>                               | Flagella assembly                                     |
| FliA                                | 30  | FliA                   | 4E-54 | 0.97 | 0.45 | <b>0.87</b>                               | Chemotaxis                                            |
| RcsAB                               | 28  | RcsAB                  | 4E-19 | 0.36 | 0.63 | <b>0.63</b>                               | Colanic acid capsule formation                        |
| <b>Regulator Discovery (3)</b>      |     |                        |       |      |      |                                           |                                                       |
| Ygbl                                | 9   | Ygbl                   |       |      |      | <b>0.7</b>                                | Unknown                                               |
| YieP                                | 11  | YieP                   |       |      |      | 0.03                                      | Unknown                                               |
| YneJ                                | 5   | YneJ                   |       |      |      | <b>0.63</b>                               | Unknown                                               |
| <b>Genomic Alterations (15)</b>     |     |                        |       |      |      |                                           |                                                       |
| BW25113                             | 17  |                        |       |      |      |                                           | Transcriptional difference between BW25113 and MG1655 |
| crp-KO                              | 14  |                        |       |      |      |                                           | Accounts for crp knock-out                            |
| deletion-1                          | 41  |                        |       |      |      |                                           | Large deletion of 39 genes during evolution           |
| deletion-2                          | 110 |                        |       |      |      |                                           | Large deletion of 171 genes during evolution          |
| duplication-1                       | 84  |                        |       |      |      |                                           | Large duplication of 129 genes during evolution       |
| e14-deletion                        | 11  |                        |       |      |      |                                           | Removal of e14 prophage                               |
| efeU-repair                         | 8   |                        |       |      |      |                                           | Accounts for repair and expression of efeU operon     |
| entC-menF-KO                        | 3   |                        |       |      |      |                                           | Accounts for entC and menF knock-outs                 |
| fur-KO                              | 13  |                        |       |      |      |                                           | Accounts for fur knock-out                            |
| gadWX-KO                            | 2   |                        |       |      |      |                                           | Accounts for gadW and gadX knock-outs                 |
| insertion                           | 9   |                        |       |      |      |                                           | IS2 insertion element after laboratory evolution      |
| purR-KO                             | 3   |                        |       |      |      |                                           | Accounts for purR knock-out                           |
| thrA-KO                             | 3   |                        |       |      |      |                                           | Accounts for thrA knock-out                           |
| ydcl-KO                             | 3   |                        |       |      |      |                                           | Accounts for ydcl knock-out                           |
| yheO-KO                             | 16  |                        |       |      |      |                                           | Accounts for yheO knock-out                           |
| <b>Biological Enrichment (10)</b>   |     |                        |       |      |      |                                           |                                                       |

|                            |    |  |  |  |  |  |                                       |
|----------------------------|----|--|--|--|--|--|---------------------------------------|
| curli                      | 4  |  |  |  |  |  | Curli assembly                        |
| fimbriae                   | 8  |  |  |  |  |  | Fimbriae assembly                     |
| flu-yeeRS                  | 8  |  |  |  |  |  | Genes in CP4-44 prophage              |
| iron-related               | 20 |  |  |  |  |  | Related to iron metabolism            |
| lipopolysaccharide         | 36 |  |  |  |  |  | Lipopolysaccharide biosynthesis       |
| membrane                   | 15 |  |  |  |  |  | Enriched in membrane-bound proteins   |
| nitrate-related            | 14 |  |  |  |  |  | Nitric oxide response                 |
| proVWX                     | 4  |  |  |  |  |  | Glycine betaine transport             |
| sgrT                       | 4  |  |  |  |  |  | Contains single dominating gene: sgrT |
| translation                | 24 |  |  |  |  |  | Enriched in translation machinery     |
| <b>Uncharacterized (7)</b> |    |  |  |  |  |  |                                       |
| uncharacterized-1          | 15 |  |  |  |  |  | Unknown                               |
| uncharacterized-2          | 42 |  |  |  |  |  | Unknown                               |
| uncharacterized-3          | 2  |  |  |  |  |  | Unknown                               |
| uncharacterized-4          | 10 |  |  |  |  |  | Unknown                               |
| uncharacterized-5          | 4  |  |  |  |  |  | Unknown                               |
| uncharacterized-6          | 54 |  |  |  |  |  | Unknown                               |

**Supplementary Table 2: ChIP-exo binding sites for MetJ**

| Peak Name | Binding peak location | Peak Intensity | Transcription Unit (+ strand) | Gene Loci (+ strand)                                                    | Transcription Unit (- strand) | Gene Loci (- strand)          |
|-----------|-----------------------|----------------|-------------------------------|-------------------------------------------------------------------------|-------------------------------|-------------------------------|
| MetJ-1    | 83550                 | 35             |                               |                                                                         | leuLABCD                      | b0071;b0072;b0073;b0074;b0075 |
| MetJ-2    | 179560                | 23             | dgt                           | b0160                                                                   | mtn-btuF-yadS                 | b0157;b0158;b0159             |
| MetJ-3    | 222715                | 11             | gmhB                          | b0200                                                                   | metNIQ                        | b0197;b0198;b0199             |
| MetJ-4    | 275303                | 56             | mmuPM                         | b0260;b0261                                                             | insH-1                        | b0259                         |
| MetJ-5    | 633492                | 63             | ybdL                          | b0600                                                                   | ybdH                          | b0599                         |
| MetJ-6    | 1154392               | 27             | pabC-mltG-tmk-holB-ycfH       | b1096;b1097;b1098;b1099;b1100                                           |                               |                               |
| MetJ-7    | 1398937               | 34             |                               |                                                                         | uspE                          | b1333                         |
| MetJ-8    | 1459265               | 43             | paaABCDEFGHIJJK               | b1388;b1389;b1390;b1391;b1392;b1393;b1394;b1395;b1396;b1397;b1398       |                               |                               |
| MetJ-9    | 1610723               | 36             |                               |                                                                         | uxaB                          | b1521                         |
| MetJ-10   | 1632086               | 27             |                               |                                                                         | ydfJ_2                        | b4600_2                       |
| MetJ-11   | 1714512               | 17             | gstA                          | b1635                                                                   |                               |                               |
| MetJ-12   | 2132965               | 26             |                               |                                                                         | wza-wzb-wzc-wcaAB             | b2058;b2059;b2060;b2061;b2062 |
| MetJ-13   | 2154128               | 37             | mdtABCD-baeSR                 | b2074;b2075;b2076;b2077;b2078;b2079                                     | ibsB                          | b4668                         |
| MetJ-14   | 2563581               | 46             | yffQR                         | b2448;b2449                                                             |                               |                               |
| MetJ-15   | 2564631               | 29             | yffS                          | b2450                                                                   |                               |                               |
| MetJ-16   | 3086219               | 18             | yqgC;metK                     | b2940;b2942                                                             | speAB;yqgB                    | b2937;b2938;b2939             |
| MetJ-17   | 3152198               | 78             | metC                          | b3008                                                                   | exbBD                         | b3005;b3006                   |
| MetJ-18   | 3243319               | 39             |                               |                                                                         | uxaCA                         | b3091;b3092                   |
| MetJ-19   | 3353095               | 58             |                               |                                                                         | arcB                          | b3210                         |
| MetJ-20   | 3458579               | 49             | gspCDEFGHIJKLMO               | b3324;b3325;b3326;b3327;b3328;b3329;b3330;b3331;b3332;b3333;b3334;b3335 |                               |                               |
| MetJ-21   | 3492425               | 67             | tsgA                          | b3364                                                                   | ppiA                          | b3363                         |
| MetJ-22   | 3719905               | 39             | cspA                          | b3556                                                                   |                               |                               |
| MetJ-23   | 3891520               | 105            | mdtL                          | b3710                                                                   |                               |                               |
| MetJ-24   | 4011713               | 126            |                               |                                                                         |                               |                               |
| MetJ-25   | 4012917               | 76             | metE                          | b3829                                                                   | metR                          | b3828                         |
| MetJ-26   | 4128305               | 119            | metBL                         | b3939;b3940                                                             | yiiX;metJ                     | b3937;b3938                   |
| MetJ-27   | 4128579               | 105            | metBL                         | b3939;b3940                                                             | metJ                          | b3938                         |
| MetJ-28   | 4132531               | 98             | metF                          | b3941                                                                   |                               |                               |
| MetJ-29   | 4214175               | 75             | metA                          | b4013                                                                   | yjaB                          | b4012                         |
| MetJ-30   | 4496913               | 26             | intB                          | b4271                                                                   |                               |                               |
| MetJ-31   | 4572359               | 38             | yjiT                          | b4342                                                                   |                               |                               |

**Supplementary Table 3: ChIP-exo binding sites for CysB**

| Peak Name | Binding peak location | Peak Intensity | Transcription Unit (+ strand) | Gene Loci (+ strand)                            | Transcription Unit (- strand) | Gene Loci (- strand)                |
|-----------|-----------------------|----------------|-------------------------------|-------------------------------------------------|-------------------------------|-------------------------------------|
| CysB-1    | 50380                 | 25             |                               |                                                 |                               |                                     |
| CysB-2    | 70016                 | 15             | araC                          | b0064                                           | araBAD                        | b0061;b0062;b0063                   |
| CysB-3    | 113246                | 22             | guaC                          | b0104                                           | coaE-zapD-yacG                | b0101;b0102;b0103                   |
| CysB-4    | 135689                | 28             |                               |                                                 | yacC-speED                    | b0120;b0121;b0122                   |
| CysB-5    | 169892                | 120            | fhuACDB                       | b0150;b0151;b0152;b0153                         |                               |                                     |
| CysB-6    | 252209                | 229            | dinB-yafNOP                   | b0231;b0232;b0233;b0234                         |                               |                                     |
| CysB-7    | 385122                | 158            | tauABCD                       | b0365;b0366;b0367;b0368                         |                               |                                     |
| CysB-8    | 401038                | 216            | iraP                          | b0382                                           | ddlA                          | b0381                               |
| CysB-9    | 431231                | 58             |                               |                                                 |                               |                                     |
| CysB-10   | 451813                | 168            |                               |                                                 | cyoABCDE                      | b0428;b0429;b0430;b0431;b0432       |
| CysB-11   | 516238                | 34             | fetAB                         | b0490;b0491                                     | qmcA-ybbJ                     | b0488;b0489                         |
| CysB-12   | 609875                | 27             |                               |                                                 | fepA-entD                     | b0583;b0584                         |
| CysB-13   | 754783                | 34             | sdhCDAB-sucABCD               | b0721;b0722;b0723;b0724;b0726;b0727;b0728;b0729 | gltA                          | b0720                               |
| CysB-14   | 815328                | 26             |                               |                                                 |                               |                                     |
| CysB-15   | 850236                | 23             | ompX                          | b0814                                           | rhtA                          | b0813                               |
| CysB-16   | 866398                | 235            | iaaA-gsiABCD                  | b0828;b0829;b0830;b0831;b0832                   | moeAB                         | b0826;b0827                         |
| CysB-17   | 904593                | 26             | ybjQ-amiD                     | b0866;b0867                                     | ybjP                          | b0865                               |
| CysB-18   | 943784                | 52             | dmsABC                        | b0894;b0895;b0896                               |                               |                                     |
| CysB-19   | 997106                | 227            |                               |                                                 | ssuEADCB                      | b0933;b0934;b0935;b0936;b0937       |
| CysB-20   | 1053409               | 23             |                               |                                                 | yccM                          | b0992                               |
| CysB-21   | 1098910               | 33             | yedXY                         | b1034;b1035                                     |                               |                                     |
| CysB-22   | 1165389               | 12             | hinT-ycfL-lpoB-thiK-nagZ-ycfP | b1103;b1104;b1105;b1106;b1107;b1108             |                               |                                     |
| CysB-23   | 1195322               | 14             | icd                           | b1136                                           | rhuE-nudJ                     | b1134;b1135                         |
| CysB-24   | 1250937               | 32             | dhaR                          | b1201                                           | dhaKLM                        | b1198;b1199;b1200                   |
| CysB-25   | 1333725               | 39             | cysB                          | b1275                                           |                               |                                     |
| CysB-26   | 1350219               | 68             |                               |                                                 | yciW                          | b1287                               |
| CysB-27   | 1526120               | 273            | yncG                          | b1454                                           | ansP                          | b1453                               |
| CysB-28   | 1555778               | 15             |                               |                                                 | maeA                          | b1479                               |
| CysB-29   | 1567237               | 117            |                               |                                                 | dosCP                         | b1489;b1490                         |
| CysB-30   | 1600329               | 25             |                               |                                                 | lsrRK                         | b1511;b1512                         |
| CysB-31   | 1667332               | 6              |                               |                                                 | mhc-ynfK                      | b1593;b1594                         |
| CysB-32   | 1706881               | 12             | ydgK-rsxABCDGE-nth            | b1626;b1627;b1628;b1629;b1630;b1631;b1632;b1633 |                               |                                     |
| CysB-33   | 1810832               | 58             | ydjN                          | b1729                                           |                               |                                     |
| CysB-34   | 1818923               | 13             |                               |                                                 | chbBCARFG                     | b1733;b1734;b1735;b1736;b1737;b1738 |
| CysB-35   | 1842359               | 41             | gdhA                          | b1761                                           | ynjH                          | b1760                               |
| CysB-36   | 1924627               | 44             | holE                          | b1842                                           | yobA-yebZY                    | b1839;b1840;b1841                   |
| CysB-37   | 1977895               | 273            |                               |                                                 | flhDC                         | b1891;b1892                         |
| CysB-38   | 2032198               | 12             |                               |                                                 | dcm-vsr                       | b1960;b1961                         |
| CysB-39   | 2060953               | 122            |                               |                                                 | cbl                           | b1987                               |
| CysB-40   | 2084561               | 69             |                               |                                                 | yeeED                         | b2012;b2013                         |
| CysB-41   | 2085611               | 113            |                               |                                                 | yeeED                         | b2012;b2013                         |
| CysB-42   | 2110587               | 12             |                               |                                                 | rffBDACX                      | b2037;b2038;b2039;b2040;b2041       |
| CysB-43   | 2133482               | 17             |                               |                                                 | wza-wzb-wzc-wcaAB             | b2058;b2059;b2060;b2061;b2062       |
| CysB-44   | 2192823               | 32             |                               |                                                 | yehE                          | b2112                               |
| CysB-45   | 2240873               | 21             |                               |                                                 |                               |                                     |
| CysB-46   | 2249630               | 26             | yeiH                          | b2158                                           | yeiE                          | b2157                               |
| CysB-47   | 2413410               | 33             | ackA-ptA                      | b2296;b2297                                     | yfbV                          | b2295                               |
| CysB-48   | 2434800               | 29             |                               |                                                 | pdxB-usg-truA-dedA            | b2317;b2318;b2319;b2320             |
| CysB-49   | 2489195               | 9              |                               |                                                 | yfdX-frc-oxc-yfdVE            | b2371;b2372;b2373;b2374;b2375       |
| CysB-50   | 2532389               | 194            | cysK                          | b2414                                           |                               |                                     |
| CysB-51   | 2543583               | 227            |                               |                                                 | cysPUWAM                      | b2421;b2422;b2423;b2424;b2425       |
| CysB-52   | 2551298               | 36             |                               |                                                 | yfeYX;ypeA-yfeZ               | b2431;b2432;b2433;b2434             |

|         |         |     |                |                         |              |                                           |
|---------|---------|-----|----------------|-------------------------|--------------|-------------------------------------------|
| CysB-53 | 2563572 | 21  | yffQR          | b2448;b2449             |              |                                           |
| CysB-54 | 2616204 | 11  | bepA-yfgD      | b2494;b2495             | yfgO         | b2493                                     |
| CysB-55 | 2630311 | 36  | yfgHI          | b2505;b2506             |              |                                           |
| CysB-56 | 2876380 | 287 | iap            | b2753                   | cysDNC       | b2750;b2751;b2752                         |
| CysB-57 | 2891912 | 189 | queD           | b2765                   | cysJIH       | b2762;b2763;b2764                         |
| CysB-58 | 2971189 | 26  | ygdR;tas       | b2833;b2834             |              |                                           |
| CysB-59 | 3029593 | 8   |                |                         |              |                                           |
| CysB-60 | 3263874 | 9   |                |                         | tdcABCDEFGF  | b4471;b3113;b3114;b3115;b3116;b3117;b3118 |
| CysB-61 | 3354689 | 15  | glBDF          | b3212;b3213;b3214       |              |                                           |
| CysB-62 | 3367136 | 19  | yhcE_2F        | b4569_2;b3219           | insH-10      | b3218                                     |
| CysB-63 | 3373600 | 11  |                |                         | nanATEK-yhcH | b3221;b3222;b3223;b3224;b3225             |
| CysB-64 | 3384357 | 42  | argR           | b3237                   | mdh          | b3236                                     |
| CysB-65 | 3418320 | 15  | yhdV           | b3267                   |              |                                           |
| CysB-66 | 3558468 | 9   | rtcR           | b3422                   | rtcBA        | b4475;b3421                               |
| CysB-67 | 3712010 | 23  |                |                         | yhjX         | b3547                                     |
| CysB-68 | 3828710 | 32  | xanP           | b3654                   | glS          | b3653                                     |
| CysB-69 | 3859989 | 39  | vidL           | b3680                   | vidKJ        | b3678;b3679                               |
| CysB-70 | 3839993 | 41  | yicS           | b4555                   | nlpA         | b3661                                     |
| CysB-71 | 3867710 | 17  | vidQ           | b3688                   | ibpAB        | b3686;b3687                               |
| CysB-72 | 3891605 | 293 | mdtL           | b3710                   |              |                                           |
| CysB-73 | 4077596 | 8   | yihXY-dtd-yiiD | b3885;b3886;b3887;b3888 |              |                                           |
| CysB-74 | 4092321 | 18  |                |                         | frvABXR      | b3897;b3898;b3899;b3900                   |
| CysB-75 | 4108796 | 195 | sbp            | b3917                   |              |                                           |
| CysB-76 | 4214123 | 86  | metA           | b4013                   | yjaB         | b4012                                     |
| CysB-77 | 4270438 | 8   | yjbQR          | b4056;b4057             |              |                                           |
| CysB-78 | 4337654 | 5   |                |                         | adiY         | b4116                                     |
| CysB-79 | 4556320 | 26  |                |                         | yjiC         | b4325                                     |

**Supplementary Table 4: Computationally-detected novel TF binding sites upstream of i-modulon genes**

| Identified Motif <sup>a</sup> | I-modulon    | Operon         | Locus tag(s) in I-modulon | Site p-value         | Site start position        | Site sequence                      |
|-------------------------------|--------------|----------------|---------------------------|----------------------|----------------------------|------------------------------------|
|                               | ArcA-1       | pdhR-aceEF-lpd | b0113                     | 8.99E-06             | 121866                     | ATAGTTTAATAATCGTTAAAAAA            |
|                               |              | gcd            | b0124                     | 1.17E-05             | 141244                     | TCATTAATATTTTAGTAGCAATT            |
|                               |              | prpR           | b0330                     | 6.83E-06             | 348483                     | CTTGTTTCATAATTGTTGCAATG            |
|                               |              | ylaC           | b0458                     | 1.80E-05             | 479337                     | AATTTTGCATAACAGTTGCGAAA            |
|                               |              | borD           | b0557                     | 7.23E-05             | 578969                     | GAAATTTTCATATTGTTAATATTT           |
|                               |              | rybA-mntS      | b4705                     | 8.31E-05             | 853068                     | TATATTATATAGCTATTGCTAAA            |
|                               |              | ybjM           | b0848                     | 4.67E-05             | 889930                     | AAAGTAACAATATATTTTACTAG            |
|                               |              | dadAX          | b1190, b1189              | 2.72E-05             | 1237485                    | CATGTTGAATAATATTTTCAACT            |
|                               |              | ydcI           | b1422                     | 4.30E-07             | 1495133                    | ATTGCAAAATATFATTAACAATT            |
|                               |              | trxC           | b2582                     | 2.85E-06             | 2718666                    | TATGTAACATATTAGAAACATAC            |
|                               | CdaR         | dmlA           | b1800                     | 3.09E-12             | 1881730                    | CCGCCACGGCGGCAAAACCAGCCCGGC<br>GAG |
|                               |              |                | cra                       | b0080                | 9.48E-05                   | 87898                              |
| yagEF                         | b0269, b0268 |                | 2.61E-05                  | 282110               | TTTGGGGAGAGGGCCGGGGT       |                                    |
| ykgEFG                        | b0306        |                | 4.93E-05                  | 321477               | TTTGTTCATACAAATGAGGGG      |                                    |
| nmpC                          | b0553_1      |                | 4.93E-05                  | 576933               | TTTGTGAAGTAGATCTCTAT       |                                    |
| rihA                          | b0651        |                | 4.13E-05                  | 684435               | TTTGCACAAGGGTAACGCC        |                                    |
| ybhQ                          | b0791        |                | 0.00011                   | 824571               | TTTTCCGTAAAGTTCGGTAC       |                                    |
| bssR                          | b0836        |                | 5.85E-05                  | 877976               | TTTTTCGGACAGCCAAGGGA       |                                    |
| ycaM                          | b0899        |                | 4.52E-05                  | 946929               | TTTATCATGATCGCCAGCGT       |                                    |
| rutABCDEFG                    | b1008        |                | 0.000148                  | 1071028              | GTTTCGGGATCGGTACGTT        |                                    |
| ydcJ                          | b1423        |                | 3.45E-05                  | 1495195              | TTTCGCGCGGAGATCACAGT       |                                    |
| ydjLKJIHG                     | b1776        |                | 1.15E-05                  | 1861436              | TTTACAACCTCAGATCACAAT      |                                    |
| yebK                          | b1853        |                | 2.37E-05                  | 1936552              | TTTGTTCATTAACACGGCACA      |                                    |
| psuKG                         | b2166        |                | 1.76E-05                  | 2259505              | TTTGTGACGGGATCGCACAGA      |                                    |
| mepS                          | b2175        |                | 1.76E-05                  | 2269849              | TTTGTGCGTTAGTCCACAGA       |                                    |
| ygeV                          | b2869        |                | 8.77E-05                  | 3006008              | TTTCTGATACTTAGCAGCAA       |                                    |
| bax                           | b3570        |                | 3.78E-05                  | 3737217              | TTTTTCACAAATTTGAGAGT       |                                    |
| aphA                          | b4055        |                | 4.05E-06                  | 4269357              | TTTGCAACAAATCTCACAAAT      |                                    |
| rpiB                          | b4090        | 5.37E-05       | 4313240                   | TCTGTAAAACAGATCAGGAA |                            |                                    |
| yjdP                          | b4487        | 2.87E-05       | 4313583                   | TTTGCAGGAATTCGCGCGGT |                            |                                    |
| ghoST                         | b4128        | 2.37E-05       | 4352380                   | TTTTTCATTCTCTCCGCGAT |                            |                                    |
| ytfJ                          | b4216        | 1.19E-06       | 4439360                   | TTTGCGGTCAAGCGCACAAA |                            |                                    |
|                               | Crp-2        | nmpC           | b0553_1                   | 1.49E-06             | 576931                     | GATTTGTGAAGTAGATCTCTATTT           |
|                               |              | ydcH           | b1426                     | 1.70E-06             | 1498553                    | TAAACACGATCCCCTCGCATTTT            |
|                               |              | ilvC           | b3774                     | 2.72E-07             | 3957902                    | ATATAGTGAATTCAATCTCGCAA            |
|                               | CsqR         | ompL           | b3875                     | 1.58E-08             | 4064474                    | CCCATCGTCAATGCAGCAAT               |
|                               |              | yihPO          | b3876, b3877              | 4.32E-08             | 4067359                    | CCAGCGTGGACCCAGTTAT                |
|                               |              | yihQ           | b3878                     | 4.32E-08             | 4069515                    | GTTTTCTGATTCCAGTAAT                |
|                               |              | yihR           | b3879                     | 8.56E-08             | 4070498                    | CCTATTTTCAGATCAGTTAT               |
|                               | EvgA         | ypdI           | b2376                     | 6.25E-15             | 2494486                    | TTTTGAAAGGGTTATCTTACAGTTGTAG<br>T  |
|                               |              |                | yeiQ                      | b2172                | 8.21E-10                   | 2266109                            |
| exuT                          | b3093        |                | 4.61E-13                  | 3244995              | TTTCTGCCGTGCAAATCATAAGTCGA |                                    |
| uxaCA                         | b3091, b3092 |                | 4.61E-13                  | 3244995              | TTTCTGCCGTGCAAATCATAAGTCGA |                                    |

|      |           |                  |                           |                             |                    |                                    |
|------|-----------|------------------|---------------------------|-----------------------------|--------------------|------------------------------------|
|      | Fnr       | pgi              | b4025                     | 8.86E-10                    | 4233716            | CTTCCAAAGTCACAATTCTCAAAATCA        |
|      |           | abrB             | b0715                     | 0.000116                    | 747802             | TCGATACAGCATAAAGAA                 |
|      |           | ycbJ             | b0919                     | 3.54E-05                    | 971518             | TTGCTGTTGCTCAGGAAG                 |
|      |           | yoeA_1           | b4582_1                   | 1.22E-05                    | 2068504            | ATGATTAAGGTCAAAAAT                 |
|      |           | iscRSUA          | b2531                     | 0.000162                    | 2662361            | CTGATAAGACGCATTACG                 |
|      | ttdR      | b3060            | 5.62E-06                  | 3206313                     | CTGCTCTGGCGCAATATT |                                    |
|      | Fur-2     | ydhYVWXUT        | b1674,<br>b1673           | 1.73E-08                    | 1754721            | AACTGATATTTATTATCATTGAAAT          |
|      |           | preTA            | b2146                     | 1.55E-07                    | 2233859            | TATTGAGAATAATTACTTCACT             |
|      |           | bfd-bfr          | b3337                     | 8.14E-11                    | 3467020            | AAATGAAAATAGTTCTTATTTC AATT        |
|      | GadE/WX   | hdeD             | b3511                     | 1.34E-13                    | 3656838            | TATCAAAATCAGATATTTTTATTTC AAT      |
|      | GntR/TyrR | tyrP             | b1907                     | 4.83E-07                    | 1989419            | CTGGCATGCGTATATT                   |
|      |           | fdoGHI-fdhE      | b3892,<br>b3893           | 1.77E-07                    | 4082910            | ATGGTATCGATATCTT                   |
|      | Lrp       | ddlA             | b0381                     | 6.15E-08                    | 401144             | CTTAATTATAAGTTAACGAAGAGAATAT<br>AT |
|      |           | ydeE             | b1534                     | 8.73E-07                    | 1620894            | GTAAATGGCACAAAAAAGAAAAGCAAA<br>CTG |
|      |           | yqeG             | b2845                     | 5.88E-09                    | 2985643            | TTATCTTAATTGTTTAAAAAAAGTGATTT<br>T |
|      |           | ilvC             | b3774                     | 1.13E-06                    | 3957853            | TGCAATGTGACGTTGTGAATATATCAAT<br>TT |
|      |           | metE             | b3829                     | 5.95E-10                    | 4013032            | TATAATTAGAGGAAGAAAAAATGACAA<br>TAT |
|      | MetJ      | mmuPM            | b0261,<br>b0260           | 6.36E-12                    | 275291             | GATGTTTAGATGTCCATACGTTTAGA         |
|      |           | hcxA             | b0599                     | 1.23E-11                    | 633496             | TTTATTTAGACATCTAAACGTCTTGA         |
|      |           | ybdL             | b0600                     | 1.23E-11                    | 633496             | TTTATTTAGACATCTAAACGTCTTGA         |
|      |           | metJ             | b3938                     | 6.36E-12                    | 4128577            | GAAGTTTAGATGTCCAGATGTATTGA         |
|      | Nac       | ybeQ             | b0644                     | 2.65E-07                    | 677013             | GTCGCCAGCACCGCC                    |
|      |           | yrdE_2           | b4646_2                   | 1.13E-06                    | 3404182            | GGCGGCTGCGTGGCG                    |
|      |           | cycA             | b4208                     | 6.54E-07                    | 4429477            | GGCGAGCGCGGCGCA                    |
|      | NtrC+RpoN | prpBCDE          | b0331                     | 2.76E-06                    | 348546             | ATATTTGCGGATTAGTTCATGACTTTA        |
|      |           | ynfM             | b1596                     | 8.87E-06                    | 1669583            | AATATTCATATTTAAACATCTTATTT         |
|      |           | asr              | b1597                     | 1.64E-07                    | 1671243            | TTTATTCAGCGTTTGACATATCGTTA         |
|      |           | yeaR-yoaG        | b1797                     | 1.23E-06                    | 1880014            | AATTTGCATTTTAAATACCATTTATTG        |
|      |           | yedL             | b1932                     | 5.42E-06                    | 2010566            | ATATTTGCAAAAATAACACCAATACGGA       |
|      |           | rcnAB            | b2106                     | 6.75E-07                    | 2185884            | AGATTGCCGAATTAATACTAAGAATTA        |
|      |           | csiD-lhgO-gabDTP | b2660,<br>b2663,<br>b2659 | 2.76E-06                    | 2788876            | AATATGTCGCTTTTGTGCGCATTTTTTC       |
|      |           | hypABCDE-fhlA    | b2726                     | 5.85E-09                    | 2850467            | TTTAAGCATTTTTTGTGCCAACTTTTA        |
|      |           | asnA             | b3744                     | 6.18E-07                    | 3927080            | TTATTGAATGATTATTGCATGTGTGTC        |
| zraP | b4002     | 1.49E-07         | 4201719                   | GTATTGCATCTTCCGTGCCAACGATGA |                    |                                    |
| fdhF | b4079     | 2.86E-10         | 4299413                   | AGTATGCATCTTTTATGCCACATTTTA |                    |                                    |
|      | PurR-1    | ghxP             | b4064                     | 1.27E-08                    | 4278206            | ACGATAACGTTTGGCG                   |
|      |           |                  |                           |                             |                    |                                    |
|      | RpoS      | rclABC           | b0304                     | 2.57E-05                    | 320541             | CCGGAAACGCTGTTTTTAGCACCGGTTA       |
|      |           | yahK             | b0325                     | 0.000173                    | 342406             | TGGTGGACGCCTCTGTTCGCCGAGGC         |

|                                                                                     |      |                    |                           |          |         |                                   |
|-------------------------------------------------------------------------------------|------|--------------------|---------------------------|----------|---------|-----------------------------------|
|                                                                                     |      | yahO               | b0329                     | 1.66E-05 | 345995  | GCTCATTGCGGTGTTGACTGGCGGCGC       |
|                                                                                     |      | phoA-psiF          | b0384                     | 0.000122 | 403311  | TCGGTCTGGTTTTTTTAACCACCGTCGG      |
|                                                                                     |      | ybaY               | b0453                     | 5.82E-05 | 475405  | TTAGCGGTGCGATTGCGTTGGCGGCTT       |
|                                                                                     |      | ybaA               | b0456                     | 1.85E-05 | 476184  | GGGGCGATCCC GCCAGTTTCGCCACATC     |
|                                                                                     |      | ybdK               | b0581                     | 1.95E-06 | 607307  | GCGGATTAACCACCTGCATTTCAGTTC       |
|                                                                                     |      | ybeL               | b0643                     | 5.09E-07 | 674491  | CCGGAGCGGTGTGTTTTTCACCGCCGC       |
|                                                                                     |      | ybgS               | b0753                     | 2.86E-05 | 785787  | TCGCCTGTTGGTTGTGATTGGCCCATGC      |
|                                                                                     |      | ybhP-clbB-<br>ybhN | b0788,<br>b0789,<br>b0790 | 1.17E-05 | 824965  | CCGGCGGTAGTGTCTTTGCTGGCGAAAG      |
|                                                                                     |      | ybiO               | b0808                     | 2.63E-09 | 845988  | GCATCATTTCGGCTTCAACGCCAGCGC       |
|                                                                                     |      | yliI               | b0837                     | 0.000159 | 878155  | TCGGCGTGAAAGAATTGATCCTGGACAGC     |
|                                                                                     |      | ycaC               | b0897                     | 9.43E-07 | 946006  | TCAGCTCATCTATTTTACCGGCAACCT       |
|                                                                                     |      | ycaP               | b0906                     | 4.98E-06 | 956277  | CTGGCACATCGTCATTTTCGGTCAGTGG      |
|                                                                                     |      | ycgX               | b1161                     | 9.33E-05 | 1213607 | GCTGCGTATTCAATTAATGCGCCGTCAA      |
|                                                                                     |      | ycgB               | b1188                     | 0.00063  | 1237442 | GCAGAGTCAGGGAGATGTGAGCCAGCT<br>C  |
|                                                                                     |      | ymgE               | b1195                     | 1.48E-05 | 1244373 | CCAGTTTATCCGGGGTTATTGCCAGTAA      |
|                                                                                     |      | dgcM               | b1341                     | 0.000771 | 1408177 | CCACCTTAATTATGTACACCATGATAGC      |
|                                                                                     |      | ydcK               | b1428                     | 5.28E-05 | 1500848 | GTGGCGATTGGTTTTGTTCGGTGGTTTC      |
|                                                                                     |      | curA               | b1449                     | 3.36E-06 | 1518808 | GCAGCACAGTCGGCTTTCGGGGCAAAAC      |
|                                                                                     |      | mcbR               | b1450                     | 0.000381 | 1519841 | GCTGAAAAAACGTATTCGCTTGCAAGGT      |
|                                                                                     |      | yncG               | b1454                     | 1.17E-05 | 1525939 | GCGGCGTGTGACTGTAAGTGTGCGTGT       |
|                                                                                     |      | yddH               | b1462                     | 6.41E-05 | 1534308 | TTATCAAATCCGCCAGCATTACCGCCGC      |
|                                                                                     |      | adhP               | b1478                     | 1.09E-06 | 1554120 | TCTGAATATCTTTCAGTTCGGCAGTAC       |
|                                                                                     |      | ydeI               | b1536                     | 0.000588 | 1624878 | CTACCGCCAATCATGCACCGGCGGTAA       |
|                                                                                     |      | ydhS               | b1668                     | 0.000122 | 1746925 | TCGGCGTTGAGGAAGTTGTGCCAAAGT       |
|                                                                                     |      | ldtE               | b1678                     | 1.27E-06 | 1759256 | GCAGCAACTTTTCTTTATCCGGCAATAA      |
|                                                                                     |      | ydiZ               | b1724                     | 1.27E-06 | 1806853 | GCTGCATCGTCGACAGTCTGGCGAAGC       |
|                                                                                     |      | yniA               | b1725                     | 5.82E-05 | 1807312 | CCAGCATTGGGGGAATCATCACCAACCT      |
|                                                                                     |      | yeaGH              | b1784,<br>b1783           | 0.000548 | 1866447 | GTGCCAGAAGTTTGAGTTTGGTCACAAT      |
|                                                                                     |      | yeaQ               | b1795                     | 1.85E-05 | 1879342 | GCATCACGGAGGTTTTTTTTGCGATGGC      |
|                                                                                     |      | yebV               | b1836                     | 1.32E-05 | 1921391 | GCACAACAAAGGTTATCGCTGGCAGCAT      |
|                                                                                     |      | yebF               | b1847                     | 1.11E-07 | 1930542 | TCAGCACATCTTTTGTCTGCCAGCCA        |
|                                                                                     |      | yodD               | b1953                     | 7.75E-05 | 2024512 | GCATAATAAACAGGTTATCTACCATGTC      |
|                                                                                     |      | yedP               | b1955                     | 3.91E-05 | 2025315 | TCACCTTATCCGCAATTTTTTCGCTGA       |
|                                                                                     |      | yegP               | b2080                     | 3.91E-05 | 2164982 | CTGCCGATCGTTTAGTTTTAGCGACAT       |
|                                                                                     |      | yegS               | b2086                     | 0.000133 | 2168608 | CTGAACTGACTTTTTATCTCCGACTT        |
|                                                                                     |      | yehE               | b2112                     | 5.65E-06 | 2193243 | GCTGTGATGGTATTTTTTCAGCCAGTTF      |
|                                                                                     |      | yohF               | b2137                     | 3.69E-07 | 2227522 | CCTGATGCTGGTTTTTCTCCGCCAGTGT      |
|                                                                                     |      | yfcG               | b2302                     | 8.11E-07 | 2420079 | CCGTTAGTGGCGCTTTTTTCCGCCCCGC      |
|                                                                                     |      | yfdC               | b2347                     | 6.41E-05 | 2464736 | CCTGCAAGAAGTAGTTAACCATCACCCGC     |
|                                                                                     |      | yphA               | b2543                     | 5.65E-06 | 2672839 | CCTGCGATCCC CGCATCTTTCGGGTTGG     |
|                                                                                     |      | yfiL               | b2602                     | 0.000204 | 2741113 | CGGTAATATGTACGTTATTCAGCGCGTC      |
|                                                                                     |      | ygaM               | b2672                     | 2.86E-05 | 2799546 | TGGTACTTCTCAGATTATTGCCGCCGA       |
|                                                                                     |      | ygdI               | b2809                     | 0.000122 | 2943394 | GCGTCTATCTCGACAGCGCCGCGACCCG      |
|                                                                                     |      | yghA               | b3003                     | 1.95E-06 | 3149323 | CCGCCATCGAGAAGATATTCCGGCAGTAC     |
|                                                                                     |      | ygiW               | b3024                     | 9.33E-05 | 3169774 | GCGTTACAACACGGTTTACTGGCAGCAA      |
|                                                                                     |      | yqiG               | b3102                     | 1.17E-05 | 3250766 | GCACCACAGCCCTGTTTACTGCGGGCTT      |
|                                                                                     |      | yhbO               | b3153                     | 9.25E-06 | 3298749 | GCGCAGCAATGGCGTAACTTTCGGTTC       |
|                                                                                     |      | yhcO               | b3239                     | 5.28E-05 | 3386206 | GCGTCGGTTTTGACTTAACTATCGGTCA      |
|                                                                                     |      | bfd-bfr            | b3336                     | 0.000188 | 3466819 | GCAGCTGCATTAATTCATCTCCATCAC       |
|                                                                                     |      | ggt                | b3447                     | 5.28E-05 | 3586811 | CGGTTTTATCATCGTTATTCTCCAGAGA      |
|                                                                                     |      | yhjY               | b3548                     | 0.000221 | 3713215 | CTGGATTATCGTGGATCACCGCTCTCAA      |
|                                                                                     |      | ubiCA              | b4039                     | 0.00051  | 4252332 | CGGTTGCCCTCGGCACGCGGCATCGG        |
|                                                                                     |      | yjbJ               | b4045                     | 4.98E-06 | 4259046 | GCGTTGCGCGGGCTTCTCTGGCGGCTA       |
|                                                                                     |      | yjdN               | b4107                     | 4.98E-06 | 4326057 | GCGGCGTAAACGCCTTATCCGGCCTACG      |
|                                                                                     |      | ahr                | b4269                     | 8.20E-06 | 4496165 | TCGCCGCCCGCTTCTTTTGGCGCATAGC      |
|                                                                                     |      | mdtM-yjiN          | b4336                     | 2.31E-05 | 4567453 | CCATCAGGATCACCATATTTAGCGATGC      |
|                                                                                     |      | ytjA               | b4568                     | 3.53E-05 | 4611717 | GCGTTGAAGGGGTGACCTCTGTGACCGA      |
|  | XylR | yaIB               | b3563                     | 2.69E-11 | 3728000 | TGGTAGATGCGACTGTCTAACGGTAGT<br>TG |



|                                                                                   |                     |                            |                           |          |         |                                     |
|-----------------------------------------------------------------------------------|---------------------|----------------------------|---------------------------|----------|---------|-------------------------------------|
|                                                                                   |                     | yicJl                      | b3656,<br>b3657           | 6.27E-12 | 3836034 | TGTTTTATGTGATCGTGGTAGCGTTAATT<br>C  |
|                                                                                   |                     | xylE                       | b4031                     | 7.29E-11 | 4242329 | TCATTTTTTACAATGCGTTTACGTAATGT<br>C  |
|  | Zinc                | pliG                       | b1178                     | 1.75E-13 | 1227502 | GAACTGTTATAATATAACAATCCCTAAC        |
|  | nitrate-<br>related | hcp-hcr-poxB-<br>ltaE-ybjT | b0872,<br>b0873           | 4.49E-12 | 913876  | ATAAAAGGGATTTTTTCATGCAACTTTAA<br>GG |
|                                                                                   |                     | fdnGHI                     | b1476,<br>b1474,<br>b1475 | 4.78E-10 | 1547201 | TTAAGCTGAATTTTATAGCATTITTTTAA<br>C  |
|                                                                                   |                     | yeaR-yoaG                  | b1796,<br>b1797           | 1.36E-11 | 1880012 | ATAATTTGCATTTTAAATACCATTATTG<br>G   |
|                                                                                   |                     | hmp                        | b2552                     | 4.10E-12 | 2685783 | ATAAGATGCATTTGAGATACATCAATTA<br>AG  |
|                                                                                   |                     | ygbA                       | b2732                     | 5.60E-11 | 2856821 | TTAAGATGTATTTATATTACATCTTAATC<br>T  |
|                                                                                   |                     | ytfE                       | b4209                     | 4.42E-17 | 4432007 | ATAAGATGTATTTTAAATGCATCTTTAA<br>GG  |

<sup>a</sup>Motifs were identified by searching all upstream sequences of genes in an i-modulon, and compared to reported motifs in RegulonDB (See Methods). If a match was found, the top motif is the RegulonDB motif, and the bottom motif is the motif found upstream of i-modulon genes.

**Supplementary Table 5: I-modulon membership for uncharacterized genes.**(as defined by Ghatak et al. 2018<sup>28</sup>. Additional annotations are derived from i-modulon membership)

| b-number | Gene Name | I-modulon      | Current Annotation from Ecocyc                                      | Additional annotation from i-modulon membership |
|----------|-----------|----------------|---------------------------------------------------------------------|-------------------------------------------------|
| b0511    | ybbW      | AIIR/AraC/FucR | putative allantoin transporter                                      |                                                 |
| b0975    | hyaD      | ArcA-1         | putative hydrogenase 1 maturation protease HyaD                     |                                                 |
| b0976    | hyaE      | ArcA-1         | putative HyaA chaperone                                             |                                                 |
| b0977    | hyaF      | ArcA-1         | protein HyaF                                                        |                                                 |
| b2725    | hycA      | ArcA-1         | regulator of the transcriptional regulator FhlA                     |                                                 |
| b2998    | yghW      | ArcA-1         | DUF2623 domain-containing protein YghW                              |                                                 |
| b0458    | ylaC      | ArcA-2         | putative inner membrane protein                                     |                                                 |
| b0848    | ybjM      | ArcA-2         | putative inner membrane protein                                     |                                                 |
| b2181    | yejG      | ArcA-2         | protein YejG                                                        |                                                 |
| b2847    | yqeI      | ArcA-2         | putative transcriptional regulator YqeI                             |                                                 |
| b3820    | yigI      | ArcA-2         | putative thioesterase YigI                                          |                                                 |
| b2221    | atoD      | AtoC           | acetyl-CoA:acetoacetyl-CoA transferase subunit &alpha;              |                                                 |
| b2223    | atoE      | AtoC           | short chain fatty acid transporter                                  |                                                 |
| b2788    | gudX      | CdaR           | glucarate dehydratase-related protein                               |                                                 |
| b2789    | gudP      | CdaR           | galactarate/glucarate/glycerate transporter GudP                    |                                                 |
| b0795    | ybhG      | CecR           | HlyD_D23 family protein YbhG                                        |                                                 |
| b0287    | yagU      | CpxR           | inner membrane protein that contributes to acid resistance          |                                                 |
| b0461    | tomB      | CpxR           | protein that modulates Hha toxicity                                 |                                                 |
| b1843    | yobB      | CpxR           | putative carbon-nitrogen hydrolase family protein YobB              |                                                 |
| b1846    | yebE      | CpxR           | conserved inner membrane protein YebE                               |                                                 |
| b4188    | yjFN      | CpxR           | protease activator                                                  |                                                 |
| b2166    | psuK      | Cra            | putative pseudouridine kinase                                       |                                                 |
| b3875    | ompL      | CsqR           | putative outer membrane porin L                                     |                                                 |
| b3877    | yihP      | CsqR           | putative 2,3-dihydroxypropane-1-sulfonate export protein            |                                                 |
| b3879    | yihR      | CsqR           | putative aldose 1-epimerase YihR                                    |                                                 |
| b3884    | yihW      | CsqR           | putative DNA-binding transcriptional regulator YihW                 |                                                 |
| b1287    | yciW      | CysB           | putative oxidoreductase                                             |                                                 |
| b2012    | yeeD      | CysB,membrane  | putative sulfurtransferase YeeD                                     |                                                 |
| b2013    | yeeE      | CysB,membrane  | inner membrane protein YeeE                                         |                                                 |
| b1466    | narW      | EvgA           | NarW, putative private chaperone for NarZ nitrate reductase subunit |                                                 |
| b1501    | ydeP      | EvgA           | putative oxidoreductase YdeP                                        |                                                 |
| b2082    | ogrK      | EvgA           | prophage P2 late control protein OgrK                               |                                                 |
| b2085    | yegR      | EvgA           | uncharacterized protein YegR                                        |                                                 |
| b2367    | emrY      | EvgA           | tripartite efflux pump membrane subunit EmrY                        |                                                 |
| b2368    | emrK      | EvgA           | tripartite efflux pump membrane fusion protein EmrK                 |                                                 |
| b2372    | yfdV      | EvgA           | putative transport protein YfdV                                     |                                                 |
| b2375    | yfdX      | EvgA           | protein YfdX                                                        |                                                 |
| b2376    | ypdI      | EvgA           | colanic acid synthesis putative lipoprotein YpdI                    |                                                 |
| b2172    | yeiQ      | ExuR/FucR      | putative dehydrogenase, NAD-dependent                               |                                                 |
| b0557    | borD      | FadR/IcIR      | DLP12 prophage; prophage lipoprotein BorD                           | Related to fatty acid degradation               |
| b4315    | fimI      | fimbriae       | putative fimbrial protein FimI                                      |                                                 |
| b1044    | ymdA      | FlhDC          | uncharacterized protein YmdA                                        | Flagellar protein                               |
| b1072    | flgA      | FlhDC          | flagellar basal body P-ring formation protein FlgA                  |                                                 |
| b1075    | flgD      | FlhDC          | flagellar biosynthesis, initiation of hook assembly                 |                                                 |
| b1081    | flgJ      | FlhDC          | putative peptidoglycan hydrolase FlgJ                               |                                                 |
| b1878    | flhE      | FlhDC          | flagellar protein                                                   |                                                 |
| b1904    | yecR      | FlhDC          | lipoprotein YecR                                                    |                                                 |
| b1943    | fliK      | FlhDC          | flagellar hook-length control protein                               |                                                 |
| b1566    | flxA      | FliA           | Qin prophage; protein FlxA                                          | Chemotaxis protein                              |
| b1742    | ves       | FliA           | HutD family protein Ves                                             | Chemotaxis protein                              |
| b1760    | ynjH      | FliA           | DUF1496 domain-containing protein YnjH                              | Chemotaxis protein                              |
| b4110    | yjcZ      | FliA           | uncharacterized protein YjcZ                                        | Chemotaxis protein                              |
| b1070    | flgN      | FliA,FlhDC     | flagellar biosynthesis protein FlgN                                 |                                                 |
| b1925    | fliS      | FliA,FlhDC     | flagellar biosynthesis protein FliS                                 |                                                 |
| b1926    | fliT      | FliA,FlhDC     | flagellar biosynthesis protein FliT                                 |                                                 |
| b0836    | bssR      | Fnr            | regulator of biofilm formation                                      |                                                 |
| b0919    | ycbJ      | Fnr            | putative phosphotransferase YcbJ                                    |                                                 |
| b1541    | ydfZ      | Fnr            | putative selenoprotein YdfZ                                         |                                                 |

|       |      |                    |                                                                 |                                        |
|-------|------|--------------------|-----------------------------------------------------------------|----------------------------------------|
| b1587 | ynfE | Fnr                | putative selenate reductase YnfE                                |                                        |
| b1593 | ynfK | Fnr                | putative dethiobiotin synthetase                                |                                        |
| b1750 | ydjX | Fnr                | DedA family protein YdjX                                        |                                        |
| b1751 | ydjY | Fnr                | 4Fe-4S ferredoxin-type domain-containing protein YdjY           |                                        |
| b1785 | yeaI | Fnr                | putative c-di-GMP binding protein CdgI                          |                                        |
| b1906 | yecH | Fnr                | DUF2492 domain-containing protein YecH                          |                                        |
| b3158 | yhbU | Fnr                | putative peptidase YhbU                                         |                                        |
| b3159 | yhbV | Fnr                | putative peptidase YhbV                                         |                                        |
| b3211 | yhcC | Fnr                | radical SAM family oxidoreductase YhcC                          |                                        |
| b1256 | ompW | Fnr,ArcA-1         | outer membrane protein W                                        |                                        |
| b4380 | yjiI | Fnr,SoxS           | DUF3029 domain-containing protein YjiI                          |                                        |
| b0587 | fepE | Fur-1              | polysaccharide co-polymerase family protein FepE                |                                        |
| b0803 | ybiI | Fur-1              | zinc finger domain-containing protein YbiI                      |                                        |
| b0804 | ybiX | Fur-1              | PKHD-type hydroxylase YbiX                                      |                                        |
| b1494 | pqqL | Fur-1              | putative zinc peptidase                                         |                                        |
| b1496 | yddA | Fur-1              | ABC transporter family protein YddA                             |                                        |
| b1705 | ydiE | Fur-1              | PF10636 family protein YdiE                                     |                                        |
| b1452 | yncE | Fur-1,Fur-2        | PQQ-like domain-containing protein YncE                         |                                        |
| b4567 | yjjZ | Fur-1,iron-related | protein YjjZ                                                    |                                        |
| b1495 | yddb | Fur-1,membrane     | putative TonB-dependent receptor                                |                                        |
| b0468 | ybaN | Fur-2              | conserved inner membrane protein YbaN                           |                                        |
| b1673 | ydhV | Fur-2              | putative oxidoreductase                                         |                                        |
| b1674 | ydhY | Fur-2              | putative 4Fe-4S ferredoxin-type protein                         |                                        |
| b3337 | bfd  | Fur-2              | bacterioferritin-associated ferredoxin                          |                                        |
| b3491 | yhiM | GadEWX             | inner membrane protein with a role in acid resistance           |                                        |
| b3508 | yhiD | GadEWX             | inner membrane protein YhiD                                     | Acid resistance protein                |
| b3511 | hdeD | GadEWX             | acid-resistance membrane protein                                |                                        |
| b3507 | dctR | GadEWX,GadWX       | putative DNA-binding transcriptional regulator DctR             |                                        |
| b0486 | ybaT | GadWX              | putative transporter YbaT                                       | Acid resistance protein                |
| b1426 | ydcH | GatR/GalRS         | protein YdcH                                                    | Acid resistance protein                |
| b2977 | glcG | GlcC               | putative heme-binding protein GlcG                              |                                        |
| b2979 | glcD | GlcC               | glycolate dehydrogenase, putative FAD-linked subunit            |                                        |
| b4467 | glcF | GlcC               | glycolate dehydrogenase, putative iron-sulfur subunit           |                                        |
| b4468 | glcE | GlcC               | glycolate dehydrogenase, putative FAD-binding subunit           |                                        |
| b1137 | ymfD | lipopolysaccharide | e14 prophage; putative SAM-dependent methyltransferase          | Lipopolysaccharide-related protein     |
| b1457 | ydcD | lipopolysaccharide | uncharacterized protein YdcD                                    | Lipopolysaccharide-related protein     |
| b1550 | gnsB | lipopolysaccharide | Qin prophage; protein GnsB                                      | Lipopolysaccharide-related protein     |
| b2032 | wbbK | lipopolysaccharide | putative lipopolysaccharide biosynthesis protein                |                                        |
| b2035 | wbbH | lipopolysaccharide | putative O-antigen polymerase                                   |                                        |
| b2352 | gtrS | lipopolysaccharide | CPS-53 (KpLE1) prophage; serotype specific glucosyl transferase |                                        |
| b2642 | yfjW | lipopolysaccharide | CP4-57 prophage; uncharacterized protein YfjW                   | Lipopolysaccharide-related protein     |
| b3618 | yibB | lipopolysaccharide | protein HtrL                                                    | Lipopolysaccharide-related protein     |
| b4253 | yjgL | lipopolysaccharide | protein YjgL                                                    | Lipopolysaccharide-related protein     |
| b1534 | ydeE | Lrp                | dipeptide exporter                                              |                                        |
| b1605 | ydgI | Lrp                | putative arginine:ornithine antiporter                          |                                        |
| b2845 | yqeG | Lrp                | putative transporter YqeG                                       | Amino acid or peptide transporter      |
| b4045 | yjbJ | Lrp                | putative stress response protein                                |                                        |
| b3523 | yhjE | Lrp,Nac            | putative transporter YhjE                                       | Amino acid or peptide transporter      |
| b4037 | malM | MalT               | maltose regulon periplasmic protein                             |                                        |
| b2971 | yghG | membrane           | lipoprotein YghG                                                |                                        |
| b2972 | pppA | membrane           | prepilin peptidase                                              |                                        |
| b3151 | yraQ | membrane           | permease family protein YraQ                                    |                                        |
| b4466 | sslE | membrane           | putative lipoprotein YghJ                                       |                                        |
| b3937 | yiiX | MetJ               | putative lipid binding hydrolase                                | Methionine or folate related hydrolase |
| b0644 | ybeQ | Nac                | Sell repeat-containing protein YbeQ                             | Nitrogen starvation protein            |
| b1339 | abgR | Nac                | putative LysR-type DNA-binding transcriptional regulator AbgR   |                                        |
| b1441 | ydcT | Nac                | putative ABC transporter ATP-binding protein YdcT               | Putative peptide transporter           |
| b1442 | ydcU | Nac                | putative ABC transporter membrane subunit YdcU                  | Putative peptide transporter           |
| b1443 | ydcV | Nac                | putative ABC transporter membrane subunit YdcV                  | Putative peptide transporter           |
| b3043 | ygiL | Nac                | putative fimbrial protein YgiL                                  | Nitrogen starvation protein            |
| b3446 | yrhB | Nac                | putative heat shock chaperone                                   | Nitrogen starvation protein            |

|       |      |                 |                                                                         |                                     |
|-------|------|-----------------|-------------------------------------------------------------------------|-------------------------------------|
| b1497 | ydeM | NagC/TyrR       | putative anaerobic sulfatase maturation enzyme YdeM                     |                                     |
| b1498 | ydeN | NagC/TyrR       | putative sulfatase                                                      |                                     |
| b2111 | yehD | NarL            | putative fimbrial protein YehD                                          | Nitrate-related protein             |
| b4072 | nrfC | NarL            | putative menaquinol-cytochrome <i>c</i> reductase 4Fe-4S subunit        |                                     |
| b4073 | nrfD | NarL            | putative menaquinol-cytochrome <i>c</i> reductase subunit NrfD          |                                     |
| b2208 | napF | NarL,Fnr        | ferredoxin-type protein                                                 |                                     |
| b0208 | yafC | NikR            | putative LysR family transcriptional regulator YafC                     |                                     |
| b1796 | yoaG | nitrate-related | DUF1869 domain-containing protein YoaG                                  | Nitrate-related protein             |
| b1797 | yeaR | nitrate-related | DUF1971 domain-containing protein YeaR                                  | Nitrate-related protein             |
| b2732 | ygbA | nitrate-related | protein YgbA                                                            | Nitrate-related protein             |
| b1008 | rutE | NtrC+RpoN       | putative malonic semialdehyde reductase                                 |                                     |
| b1009 | rutD | NtrC+RpoN       | putative aminoacrylate hydrolase                                        |                                     |
| b1010 | rutC | NtrC+RpoN       | putative aminoacrylate peracid reductase                                |                                     |
| b1483 | ddpF | NtrC+RpoN       | putative D,D-dipeptide ABC transporter ATP-binding subunit DdpF         |                                     |
| b1484 | ddpD | NtrC+RpoN       | putative D,D-dipeptide ABC transporter ATP-binding subunit DdpD         |                                     |
| b1485 | ddpC | NtrC+RpoN       | putative D,D-dipeptide ABC transporter membrane subunit DdpC            |                                     |
| b1486 | ddpB | NtrC+RpoN       | putative D,D-dipeptide ABC transporter membrane subunit DdpB            |                                     |
| b1487 | ddpA | NtrC+RpoN       | putative D,D-dipeptide ABC transporter periplasmic binding protein      |                                     |
| b1596 | ynfM | NtrC+RpoN       | putative transporter YnfM                                               |                                     |
| b2870 | ygeW | NtrC+RpoN       | putative carbamoyltransferase YgeW                                      |                                     |
| b2875 | yqeB | NtrC+RpoN       | XdhC-CoxI family protein YqeB                                           |                                     |
| b2876 | yqeC | NtrC+RpoN       | uncharacterized protein YqeC                                            | Nitrogen starvation protein         |
| b3269 | yhdX | NtrC+RpoN       | putative ABC transporter membrane subunit YhdX                          | Putative peptide transporter        |
| b3270 | yhdY | NtrC+RpoN       | putative ABC transporter membrane subunit YhdY                          | Putative peptide transporter        |
| b3271 | yhdZ | NtrC+RpoN       | putative ABC transporter ATP-binding subunit YhdZ                       | Putative peptide transporter        |
| b1932 | yedL | NtrC+RpoN,Nac   | putative acetyltransferase YedL                                         |                                     |
| b1660 | ydhC | PurR-1          | putative transporter YdhC                                               | Purine/purine precursor efflux pump |
| b2313 | cvpA | PurR-1          | colicin V production protein                                            | Purine biosynthetic protein         |
| b3547 | yhjX | Pyruvate        | putative pyruvate transporter                                           |                                     |
| b4353 | yjiX | Pyruvate        | conserved protein YjiX                                                  | Pyruvate-responsive protein         |
| b2044 | wcaL | RcsAB           | putative colanic biosynthesis glycosyl transferase                      |                                     |
| b2045 | wcaK | RcsAB           | putative colanic acid biosynthesis pyruvyl transferase                  |                                     |
| b2046 | wzxC | RcsAB           | G7097-MONOMER                                                           |                                     |
| b2050 | wcaI | RcsAB           | putative colanic biosynthesis glycosyl transferase                      |                                     |
| b2054 | wcaF | RcsAB           | putative acyl transferase                                               |                                     |
| b2055 | wcaE | RcsAB           | putative colanic acid biosynthesis glycosyl transferase                 |                                     |
| b2056 | wcaD | RcsAB           | putative colanic acid polymerase                                        |                                     |
| b2057 | wcaC | RcsAB           | putative colanic acid biosynthesis glycosyl transferase                 |                                     |
| b2058 | wcaB | RcsAB           | putative colanic acid biosynthesis acyl transferase                     |                                     |
| b2059 | wcaA | RcsAB           | putative colanic acid biosynthesis glycosyl transferase                 |                                     |
| b4026 | yjbE | RcsAB           | uncharacterized protein YjbE                                            | Colanic acid-related protein        |
| b4027 | yjbF | RcsAB           | lipoprotein YjbF                                                        |                                     |
| b4028 | yjbG | RcsAB           | capsule biosynthesis GfcC family protein YjbG                           |                                     |
| b1321 | ycjX | RpoH            | DUF463 domain-containing protein YcjX                                   | Chaperone-related protein           |
| b4140 | fxsA | RpoH            | protein FxsA                                                            | Chaperone-related protein           |
| b0329 | yahO | RpoS            | DUF1471 domain-containing protein YahO                                  | Stress-related protein              |
| b0453 | ybaY | RpoS            | PF09619 family lipoprotein YbaY                                         | Stress-related protein              |
| b0707 | ybgA | RpoS            | DUF1722 domain-containing protein YbgA                                  | Stress-related protein              |
| b0788 | ybhN | RpoS            | conserved inner membrane protein YbhN                                   | Stress-related protein              |
| b0790 | ybhP | RpoS            | endonuclease/exonuclease/phosphatase domain-containing protein YbhP     | Stress-related protein              |
| b0897 | ycaC | RpoS            | putative hydrolase                                                      | Stress-related protein              |
| b1003 | yccJ | RpoS            | PF13993 family protein YccJ                                             | Stress-related protein              |
| b1051 | msyB | RpoS            | acidic protein that suppresses heat sensitivity of a <i>secY</i> mutant | Stress-related protein              |
| b1188 | ycgB | RpoS            | PF04293 family protein YcgB                                             | Stress-related protein              |
| b1195 | ymgE | RpoS            | PF04226 family protein YmgE                                             | Stress-related protein              |

|       |      |            |                                                                                         |                                         |
|-------|------|------------|-----------------------------------------------------------------------------------------|-----------------------------------------|
| b1536 | ydeI | RpoS       | BOF family protein YdeI                                                                 | Stress-related protein                  |
| b1668 | ydhS | RpoS       | FAD/NAD(P) binding domain-containing protein YdhS                                       | Stress-related protein                  |
| b1784 | yeaH | RpoS       | DUF444 domain-containing protein YeaH                                                   | Stress-related protein                  |
| b1836 | yebV | RpoS       | protein YebV                                                                            | Stress-related protein                  |
| b1953 | yodD | RpoS       | stress-induced protein                                                                  | Stress-related protein                  |
| b2080 | yegP | RpoS       | DUF1508 domain-containing protein YegP                                                  | Stress-related protein                  |
| b2266 | elaB | RpoS       | tail anchored inner membrane protein                                                    | Stress-related protein                  |
| b2543 | yphA | RpoS       | putative inner membrane protein                                                         | Stress-related protein                  |
| b2672 | ygaM | RpoS       | DUF883 domain-containing protein YgaM                                                   | Stress-related protein                  |
| b3100 | yqjK | RpoS       | conserved protein YqjK                                                                  | Stress-related protein                  |
| b3239 | yhcO | RpoS       | putative barnase inhibitor                                                              | Stress-related protein                  |
| b3555 | yiaG | RpoS       | putative DNA-binding transcriptional regulator YiaG                                     | Stress-related protein                  |
| b4107 | yjdN | RpoS       | conserved protein YjdN                                                                  | Stress-related protein                  |
| b4149 | blc  | RpoS       | outer membrane lipoprotein Blc                                                          | Stress-related protein                  |
| b4568 | ytjA | RpoS       | DUF1328 domain-containing protein YtjA                                                  | Stress-related protein                  |
| b0389 | yaiA | SoxS       | protein YaiA                                                                            | Oxidative stress-related protein        |
| b0448 | mdIA | SoxS       | ABC transporter family protein MdlA                                                     |                                         |
| b0449 | mdIB | SoxS       | ABC transporter family protein MdlB                                                     |                                         |
| b0850 | ybjC | SoxS       | DUF1418 domain-containing protein YbjC                                                  | Oxidative stress-related protein        |
| b1580 | rspB | SoxS       | putative zinc-binding dehydrogenase RspB                                                |                                         |
| b1581 | rspA | SoxS       | mandelate racemase/muconate lactonizing enzyme family protein RspA                      |                                         |
| b2160 | yeiI | SoxS       | putative sugar kinase YeiI                                                              |                                         |
| b2237 | inaA | SoxS       | putative lipopolysaccharide kinase InaA                                                 |                                         |
| b2962 | yggX | SoxS       | putative Fe <sup>2+</sup> -trafficking protein                                          |                                         |
| b3238 | yhcN | SoxS       | DUF1471 domain-containing stress-induced protein YhcN                                   |                                         |
| b3898 | frvX | SoxS       | peptidase M42 family protein                                                            |                                         |
| b4536 | yobH | SoxS       | protein YobH                                                                            | Oxidative stress-related protein        |
| b0270 | yagG | XylR       | putative D-xylonate transporter YagG                                                    |                                         |
| b0271 | yagH | XylR       | CP4-6 prophage; putative xylosidase/arabinosidase                                       |                                         |
| b3562 | yiaA | XylR       | conserved inner membrane protein YiaA                                                   | Putative xylose or xyloside transporter |
| b3657 | vicJ | XylR       | putative xyloside transporter VicJ                                                      |                                         |
| b3563 | yiaB | XylR,RcsAB | conserved inner membrane protein YiaB                                                   | Putative xylose or xyloside transporter |
| b2736 | ygbJ | YgbI       | putative L-threonate dehydrogenase                                                      |                                         |
| b2737 | ygbK | YgbI       | putative 3-oxo-tetronate kinase YgbK                                                    |                                         |
| b2738 | ygbL | YgbI       | putative 3-oxo-tetronate 4-phosphate decarboxylase YgbL                                 |                                         |
| b2739 | ygbM | YgbI       | putative 2-oxo-tetronate isomerase YgbM                                                 |                                         |
| b2740 | ygbN | YgbI       | putative transporter YgbN                                                               |                                         |
| b3576 | yiaL | YiaJ       | DUF386 domain-containing protein YiaL                                                   |                                         |
| b3582 | sgbU | YiaJ       | putative L-xylulose 5-phosphate 3-epimerase                                             |                                         |
| b0306 | ykgE | YieP       | putative lactate utilization oxidoreductase YkgE                                        |                                         |
| b0307 | ykgF | YieP       | putative amino acid dehydrogenase with NAD(P)-binding domain and ferridoxin-like domain |                                         |
| b0308 | ykgG | YieP       | DUF162 domain-containing lactate utilization protein YkgG                               |                                         |
| b2141 | yohJ | YieP       | PF03788 family membrane protein YohJ                                                    |                                         |
| b2142 | yohK | YieP       | PF04712 family membrane protein YohK                                                    |                                         |
| b3755 | yieP | YieP       | putative transcriptional regulator YieP                                                 |                                         |
| b1523 | yneG | YneJ       | conserved protein YneG                                                                  |                                         |
| b1526 | yneJ | YneJ       | putative LysR-type DNA-binding transcriptional regulator YneJ                           |                                         |
| b0296 | ykgM | Zinc       | putative ribosomal protein                                                              | Zinc-related protein                    |
| b1974 | yodB | Zinc       | putative cytochrome                                                                     | Zinc-related protein                    |
| b4506 | ykgO | Zinc       | putative ribosomal protein                                                              | Zinc-related protein                    |

**Supplementary Table 6: Mutated regulators in evolved strains.**

| ALEdb ID <sup>a</sup>         | Mutations in Transcriptional Regulators                                            | Activated I-modulons | Mean Activity Level |
|-------------------------------|------------------------------------------------------------------------------------|----------------------|---------------------|
| FPS_thrA.A1.F5.I1             | Intergenic SNP between metJ and metB                                               |                      |                     |
| FPS_thrA.A2.F1.I0             | SNP in MetJ (V46E)                                                                 | MetJ                 | 7                   |
| FPS_serB.A1.F5.I1             | SNP in leader region of his operon                                                 | His-tRNA             | 13                  |
| FPS_serB.A4.F1.I0             | SNP in His-tRNA encoding gene hisR                                                 | His-tRNA             | 14                  |
| FPS_ptsI.A1.F5.I1             | SNP in Crp (A145V)                                                                 |                      |                     |
| FPS_ptsI.A3.F1.I0             | SNP in Crp (T141P)                                                                 |                      |                     |
| PAL.A2.F6.I1                  | Δ2 bp in CsqR resulting in truncation                                              | CsqR                 | 36                  |
| PAL.A2.F73.I0                 | Δ1 bp in CsqR resulting in truncation                                              | CsqR                 | 33                  |
|                               |                                                                                    | duplication-1        | 25                  |
| PAL.A4.F90.I0                 | SNP in CsqR (I156S)                                                                | CsqR                 | 33                  |
|                               |                                                                                    | duplication-1        | 25                  |
| PAL.A10.F18.I1                | IS2 insertion in RbsR coding region                                                | RbsR                 | 28                  |
| PAL.A10.F118.I0               | 100kb deletion including TFs: AbgR, RacR, FeaR, PaaX, YdcI, YdcR, MecR, YddM, YdeO | deletion-2           | -41                 |
|                               | IS2 insertion in RbsR coding region                                                | RbsR                 | 19                  |
| PAL.A14.F9.I1                 | SNP in FucR (D82Y)                                                                 | AllR/AraC/FucR       | 10                  |
|                               |                                                                                    | ExuR/FucR            | 31                  |
| PAL.A14.F78.I0                | Δ6 bp in AraC                                                                      | AllR/AraC/FucR       | 25                  |
|                               | SNP in FucR (S75R)                                                                 | AllR/AraC/FucR       | 25                  |
|                               |                                                                                    | ExuR/FucR            | 24                  |
| PAL.A16.F70.I0                | SNP in AraC (L156I)                                                                | AllR/AraC/FucR       | 31                  |
|                               | SNP in FucR (S75R)                                                                 | AllR/AraC/FucR       | 31                  |
|                               |                                                                                    | ExuR/FucR            | 23                  |
|                               | SNP in FucR (*244C)                                                                | AllR/AraC/FucR       | 31                  |
|                               | ExuR/FucR                                                                          | 23                   |                     |
| PAL.A26.F10.I1                | 36 kb deletion including TFs: KdgR, YebK                                           | deletion-1           | -29                 |
| PAL.A26.F86.I0                | 36 kb deletion including TFs: KdgR, YebK                                           | deletion-1           | -51                 |
|                               | 2bp substitution in YgbI                                                           | YgbI                 | 15                  |
| PAL.A28.F10.I1                | Intergenic SNP between dmlR and dmlA                                               |                      |                     |
|                               | SNP in YgbI (R147W)                                                                | YgbI                 | 23                  |
| PAL.A28.F88.I0                | Intergenic SNP between dmlR and dmlA                                               |                      |                     |
|                               | Δ20 bp in YgbI resulting in truncation                                             | YgbI                 | 23                  |
| EEP_menF_entC.A39.F91.I1      |                                                                                    |                      |                     |
| EEP_menF_entC.A29.F82.I1      | SNP in OxyR (A204E)                                                                | OxyR                 | 21                  |
| EEP_menF_entC.A30.F83.I1      | SNP in OxyR (A147E)                                                                | OxyR                 | 9                   |
| EEP_menF_entC_ubiC.A36.F86.I1 | SNP in YneJ (I226F)                                                                | YneJ                 | 20                  |
| EEP_menF_entC_ubiC.A37.F25.I1 |                                                                                    |                      |                     |
| EEP_menF_entC_ubiC.A38.F28.I1 |                                                                                    |                      |                     |

<sup>a</sup> Strain IDs follow identification tabs in ALEdb<sup>29</sup> (<https://aledb.org/>)

**Supplementary Table 7: Genes in the BW25113 i-modulon**

| I-modulon Gene/Operon | I-modulon Gene Coefficient(s) | Genotypic Change                                     | Putative Phenotypic Explanation                                                          |
|-----------------------|-------------------------------|------------------------------------------------------|------------------------------------------------------------------------------------------|
| <i>araBAD</i>         | -0.19; -0.25; -0.12           | Deletion of <i>araBA</i> , Truncation of <i>araD</i> | No expression in BW25113                                                                 |
| <i>rhaA</i>           | -0.11; -0.08                  | Deletion                                             | No expression in BW25113                                                                 |
| <i>lacZ</i>           | -0.14                         | Truncation                                           | Low expression in BW25113                                                                |
| <i>hsdR</i>           | -0.09                         | Truncation                                           | Low expression in BW25113                                                                |
| <i>yjjB</i>           | -0.10                         | Truncation                                           | Low expression in BW25113                                                                |
| <i>mhpCDEF</i>        | 0.19; 0.28; 0.18; 0.21        | Insertion of IS30 in <i>mhpC</i>                     | IS30 contains internal promoter <sup>30</sup> leading to increased expression in BW25113 |
| <i>tabA-ygjL</i>      | 0.32; 0.22                    | SNP at transcription start site (A→G. 4,474,834)     | Increased expression in BW25113                                                          |
| <i>fabAB</i>          | 0.09; 0.11                    | SNP in FabR                                          | Decreased repression of <i>fabAB</i> by FabR                                             |
| <i>pheA</i>           | 0.10                          | SNP in <i>pheV</i> tRNA                              | Altered tRNA-mediated attenuation via phe-tRNA                                           |

**Supplementary Table 8: Primers used in this study**

| Primer names                     | Sequence                                                                               |
|----------------------------------|----------------------------------------------------------------------------------------|
| cysB_tag_forward                 | GCATTGCGCTCTAATGAAGAAATTGAGGTCATGTTTAAAGATATAAAACTGCCG<br>GAAAAAGTCGGATCCAGTCTTCGTGAT  |
| cysB_tag_reverse                 | AAAAGAGAATATATTCCGGCACCTTCGCTACATAAAAGGTGCCGAAAATAACG<br>CAAGAAAAATTCCGGGGATCCGTTCGACC |
| cysB_conf_forward                | GCGTGTTGATGCTCACGATA                                                                   |
| cysB_conf_reverse                | CGAGGCGGGTAATTAGACACT                                                                  |
| metJ_tag_forward                 | CCGGAAGCGGCAAAAGAGATCATGCGTGAGATGGGGATTAACCCGGAGACGTG<br>GGAATACGTTCGGATCCAGTCTTCGTGAT |
| metJ_tag_reverse                 | ACGTAGGCCTGATAAGCGTAGCGCATCAGGCGATTCCACTCCGCGCCGCTCTTT<br>TTTGCTAATTCCGGGGATCCGTTCGACC |
| metJ_conf_forward                | ACAACCTGCGTCACGCTAC                                                                    |
| metJ_conf_reverse                | TTATCCGGCCTACAAGTTCG                                                                   |
| PCR Enrichment Non-Indexed Oligo | AATGATACGGCGACCACCGAGAT                                                                |
| PCR Enrichment Indexed Oligo     | CAAGCAGAAGACGGCATAACGAGATatccggeGTGACTGGAGTTCAGACGTGTGCTC<br>TTCCGATCT                 |



## Supplementary References

1. Faith, J. J. *et al.* Large-scale mapping and validation of Escherichia coli transcriptional regulation from a compendium of expression profiles. *PLoS Biol.* **5**, e8 (2007).
2. Santos-Zavaleta, A. *et al.* A unified resource for transcriptional regulation in Escherichia coli K-12 incorporating high-throughput-generated binding data into RegulonDB version 10.0. *BMC Biol.* **16**, 91 (2018).
3. Baneyx, F. & Mujacic, M. Recombinant protein folding and misfolding in Escherichia coli. *Nat. Biotechnol.* **22**, 1399–1408 (2004).
4. Guzmán, G. I. *et al.* Enzyme promiscuity shapes adaptation to novel growth substrates. *Mol. Syst. Biol.* **15**, e8462 (2019).
5. Ploeg, J. R. van der *et al.* Identification of sulfate starvation-regulated genes in Escherichia coli: a gene cluster involved in the utilization of taurine as a sulfur source. *Journal of Bacteriology* **178**, 5438–5446 (1996).
6. Kim, D. *et al.* Systems assessment of transcriptional regulation on central carbon metabolism by Cra and CRP. *Nucleic Acids Res.* **46**, 2901–2917 (2018).
7. Latif, H. *et al.* ChIP-exo interrogation of Crp, DNA, and RNAP holoenzyme interactions. *PLoS One* **13**, e0197272 (2018).
8. Nishino, K., Inazumi, Y. & Yamaguchi, A. Global analysis of genes regulated by EvgA of the two-component regulatory system in Escherichia coli. *J. Bacteriol.* **185**, 2667–2672 (2003).
9. Stiefel, A. *et al.* Control of the ferric citrate transport system of Escherichia coli: mutations in region 2.1 of the FecI extracytoplasmic-function sigma factor suppress mutations in the FecR transmembrane regulatory protein. *J. Bacteriol.* **183**, 162–170 (2001).
10. Seo, S. W. *et al.* Deciphering Fur transcriptional regulatory network highlights its complex role beyond iron metabolism in Escherichia coli. *Nat. Commun.* **5**, 4910 (2014).
11. McHugh, J. P. *et al.* Global iron-dependent gene regulation in Escherichia coli. A new mechanism for iron homeostasis. *J. Biol. Chem.* **278**, 29478–29486 (2003).
12. McCloskey, D. *et al.* Multiple Optimal Phenotypes Overcome Redox and Glycolytic Intermediate Metabolite Imbalances in Escherichia coli pgi Knockout Evolutions. *Appl. Environ. Microbiol.* **84**, (2018).
13. Sandberg, T. E. *et al.* Evolution of Escherichia coli to 42 °C and subsequent genetic engineering reveals

- adaptive mechanisms and novel mutations. *Mol. Biol. Evol.* **31**, 2647–2662 (2014).
14. Turnbough, C. L., Jr & Switzer, R. L. Regulation of pyrimidine biosynthetic gene expression in bacteria: repression without repressors. *Microbiol. Mol. Biol. Rev.* **72**, 266–300, table of contents (2008).
  15. Behr, S. *et al.* Identification of a High-Affinity Pyruvate Receptor in Escherichia coli. *Sci. Rep.* **7**, 1388 (2017).
  16. Torres-Cabassa, A. S. & Gottesman, S. Capsule synthesis in Escherichia coli K-12 is regulated by proteolysis. *J. Bacteriol.* **169**, 981–989 (1987).
  17. Chang, Y. Y., Wang, A. Y. & Cronan, J. E., Jr. Expression of Escherichia coli pyruvate oxidase (PoxB) depends on the sigma factor encoded by the rpoS(katF) gene. *Mol. Microbiol.* **11**, 1019–1028 (1994).
  18. Chiang, S. M., Dong, T., Edge, T. A. & Schellhorn, H. E. Phenotypic diversity caused by differential RpoS activity among environmental Escherichia coli isolates. *Appl. Environ. Microbiol.* **77**, 7915–7923 (2011).
  19. Gao, Y. *et al.* Systematic discovery of uncharacterized transcription factors in Escherichia coli K-12 MG1655. *Nucleic Acids Res.* (2018). doi:10.1093/nar/gky752
  20. Anand, A. *et al.* Pseudogene repair driven by selection pressure applied in experimental evolution. *Nat Microbiol* (2019). doi:10.1038/s41564-018-0340-2
  21. Mehta, P., Casjens, S. & Krishnaswamy, S. Analysis of the lambdoid prophage element e14 in the E. coli K-12 genome. *BMC Microbiol.* **4**, 4 (2004).
  22. Jensen, K. F. The Escherichia coli K-12 ‘wild types’ W3110 and MG1655 have an rph frameshift mutation that leads to pyrimidine starvation due to low pyrE expression levels. *J. Bacteriol.* **175**, 3401–3407 (1993).
  23. Lloyd, C. R., Park, S., Fei, J. & Vanderpool, C. K. The Small Protein SgrT Controls Transport Activity of the Glucose-Specific Phosphotransferase System. *J. Bacteriol.* **199**, (2017).
  24. Huerta-Cepas, J. *et al.* eggNOG 4.5: a hierarchical orthology framework with improved functional annotations for eukaryotic, prokaryotic and viral sequences. *Nucleic Acids Res.* **44**, D286–93 (2016).
  25. Oliphant, T. E. Python for Scientific Computing. *Computing in Science Engineering* **9**, 10–20 (2007).
  26. Bailey, T. L. *et al.* MEME SUITE: tools for motif discovery and searching. *Nucleic Acids Res.* **37**, W202–8 (2009).
  27. Gupta, S., Stamatoyannopoulos, J. A., Bailey, T. L. & Noble, W. S. Quantifying similarity between motifs. *Genome Biol.* **8**, R24 (2007).
  28. Ghatak, S., King, Z. A., Sastry, A. & Palsson, B. O. The y-ome defines the 35% of Escherichia coli genes that

- lack experimental evidence of function. *Nucleic Acids Res.* **47**, 2446–2454 (2019).
29. Phaneuf, P. V., Gosting, D., Palsson, B. O. & Feist, A. M. ALEdb 1.0: a database of mutations from adaptive laboratory evolution experimentation. *Nucleic Acids Res.* **47**, D1164–D1171 (2019).
30. Dalrymple, B. & Arber, W. Promotion of RNA transcription on the insertion element IS30 of *E. coli* K12. *EMBO J.* **4**, 2687–2693 (1985).
