# Supplementary material for: The Escherichia coli transcriptome mostly consists of independently regulated modules
Source: PubMed Central journal article supplement (PMC6892915; doi:10.1038/s41467-019-13483-w), 2019-12-04
Supplement: 41467_2019_13483_MOESM3_ESM.pdf [file 41467_2019_13483_MOESM3_ESM.pdf]

## **Description of Additional Supplementary Files**

File Name: Supplementary Data 1

Description: Expression levels, experimental conditions, and i-modulon decomposition of the PRECISE compendium.

File Name: Supplementary Data 2

Description: Descriptive characteristics of the 92 i-modulons.
