# Supplementary material for: The Escherichia coli transcriptome mostly consists of independently regulated modules
Source: PubMed Central journal article supplement (PMC6892915; doi:10.1038/s41467-019-13483-w), 2019-12-04
Supplement: 41467_2019_13483_MOESM5_ESM.pdf [file 41467_2019_13483_MOESM5_ESM.pdf]

# ArcA – 1 I-Modulon

Regulated by: ArcA

Biological Function: Anaerobic response

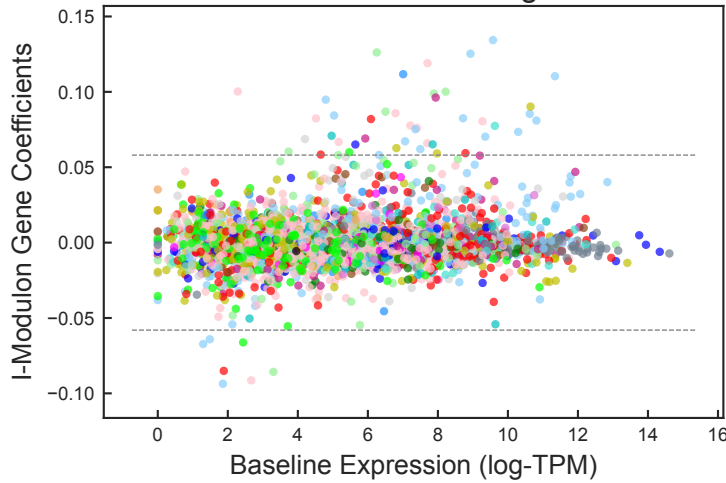

## COG Categories

- Energy production and conversion (17): *cyoA*, *cyoB*, *cyoC*, *cyoD*, *dctA*, *dcuC*, *fdoG*, *fixB*, *glpA*, *glpD*, *lldP*, *mgo*, *sdhA*, *sdhB*, *sdhC*, *sdhD*, *sthA*
- Transcription (6): *glcC*, *mhpR*, *pdhR*, *prpR*, *ydcl*, *yqeI*
- Amino acid transport and metabolism (4): *astC*, *dadA*, *glpB*, *puuA*
- Carbohydrate transport and metabolism (3): *gcd*, *kgtP*, *ugpB*
- Other (20): *mnrB*, *trxC*, *bssR*, *phoH*, *dadX*, *ugpA*, *ndk*, *yigl*, *borD*, *kefG*, *lsrG*, *puuD*, *ybjM*, *ydgC*, *yeaC*, *yejG*, *ylaC*, *ynaJ*, *mntS*, *yqeJ*

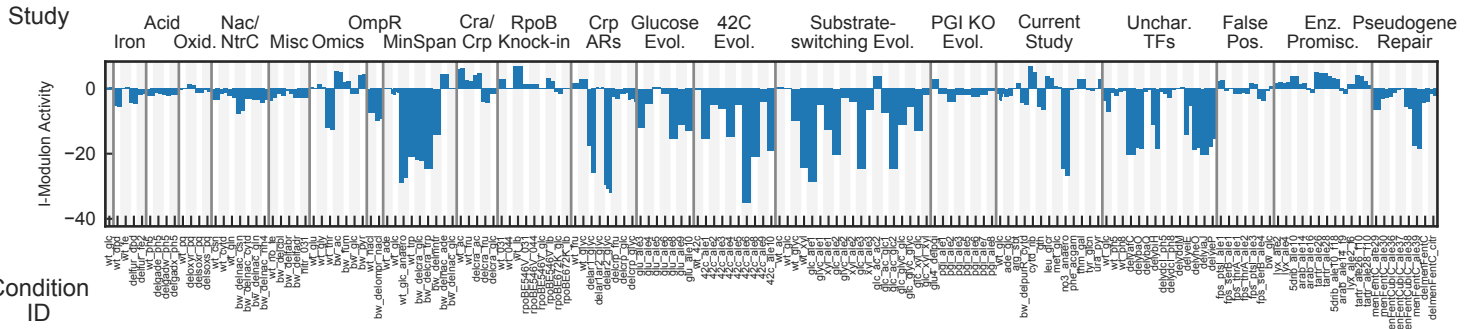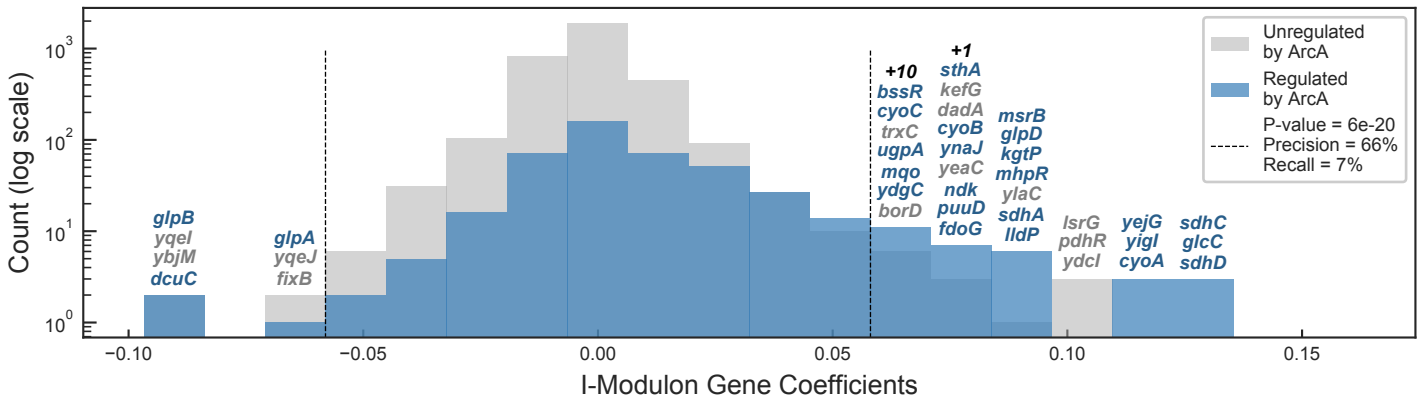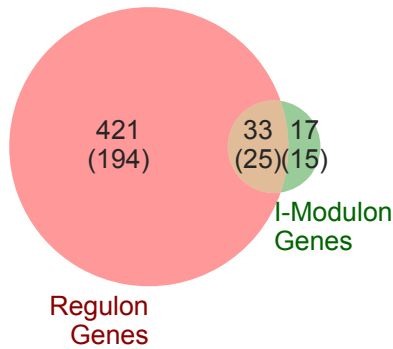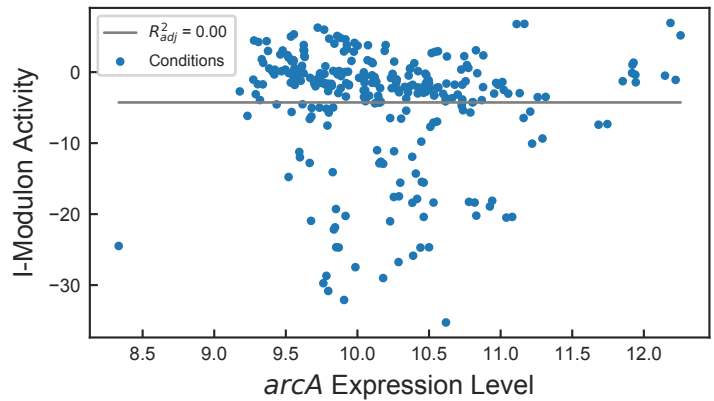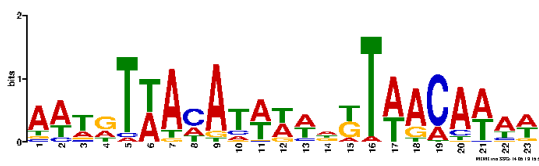

Motif E-value: 1.40e-12  
Operons with Upstream Motif: 85%

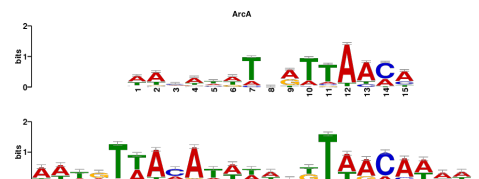

Motif similar to ArcA (E-value: 3.24e-04)

# ArcA – 2 I-Modulon

Regulated by: ArcA

Biological Function: Electron Transport Chain

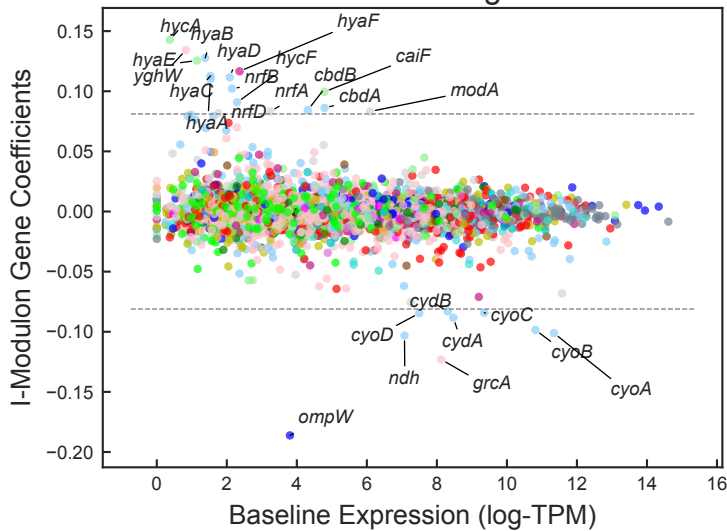

## COG Categories

- Energy production and conversion (15): *cbdA, cbdB, cydA, cydB, cyoA, cyoB, cyoC, cyoD, hyaA, hyaB, hyaC, hyaD, hycF, ndh, nrfB*
- Inorganic ion transport and metabolism (3): *modA, nrfA, nrfD*
- Transcription (3): *caiF, hyaE, hycA*
- Cell wall/membrane/envelope biogenesis (1): *ompW*
- Posttranslational modification, protein turnover, chaperones (1): *hyaF*
- Function unknown (2): *grcA, yghW*

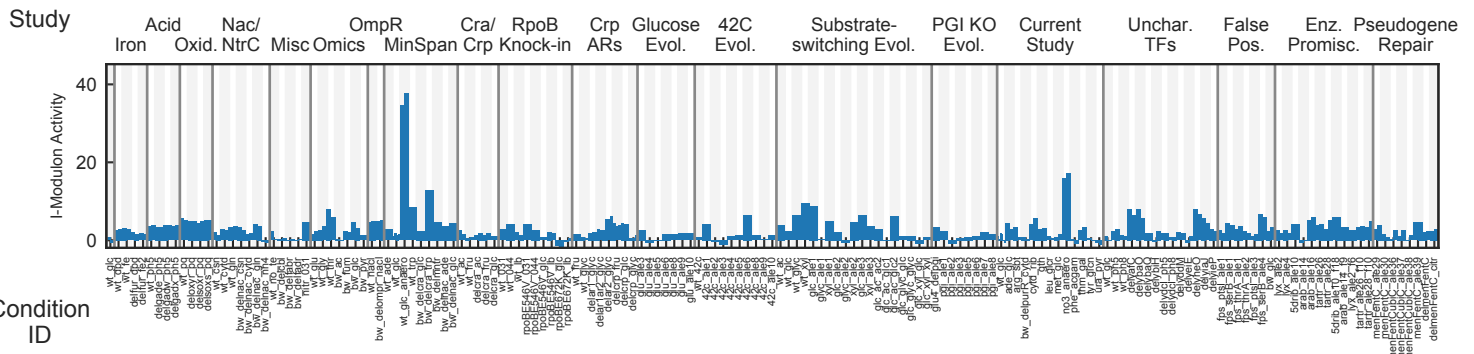

Condition ID

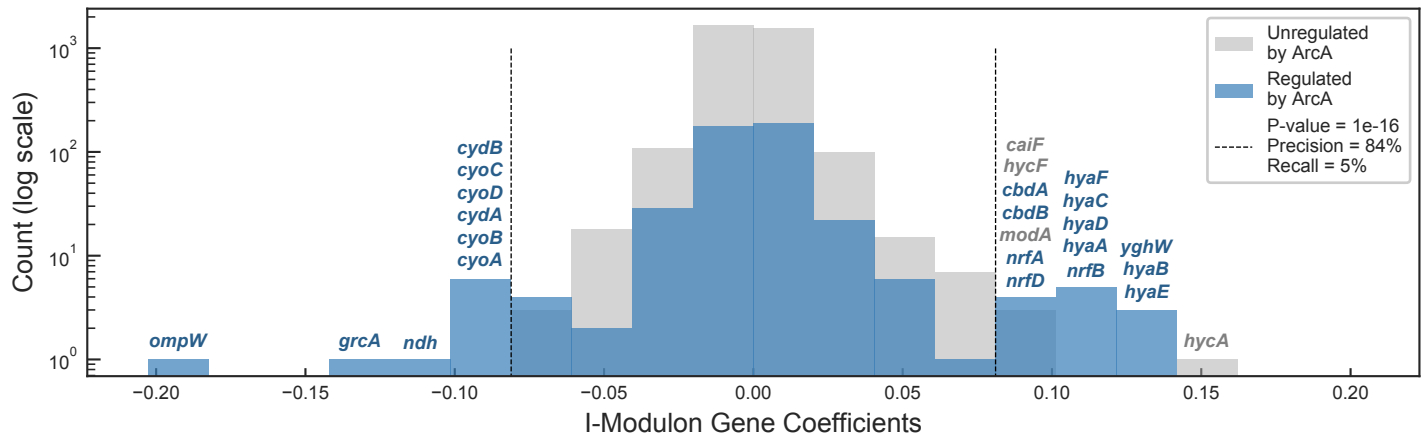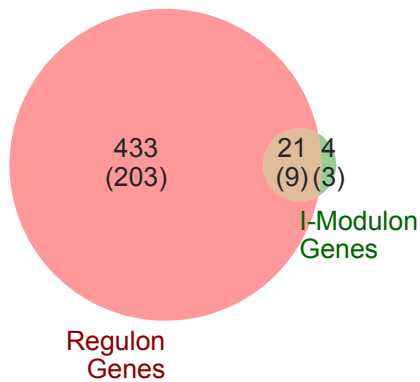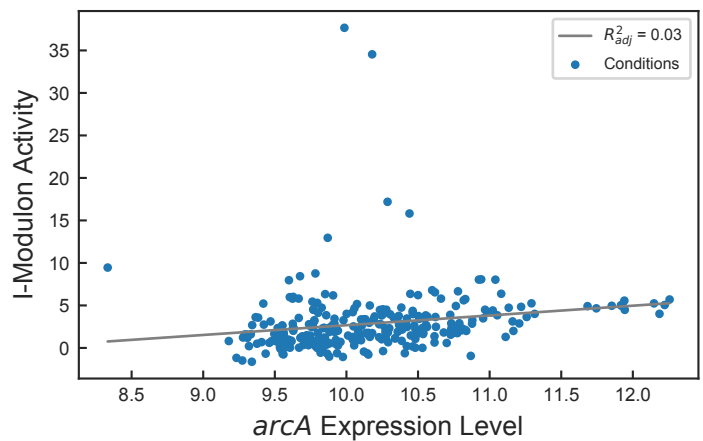

# ArgR I-Modulon

Regulated by: ArgR

Biological Function: Arginine biosynthesis

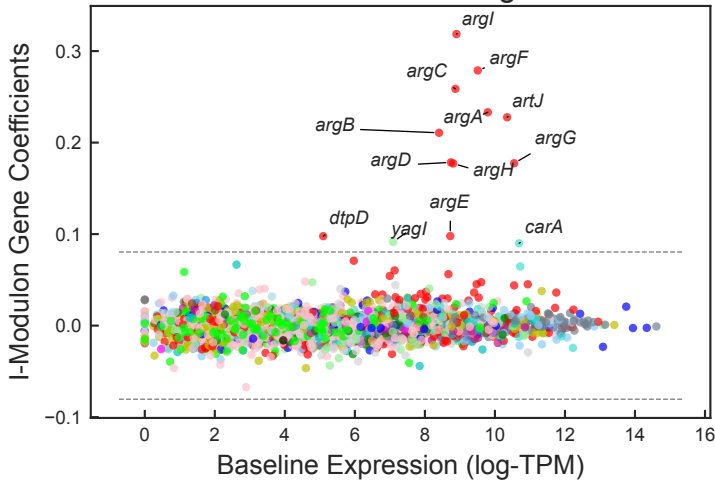

## COG Categories

- Amino acid transport and metabolism (11): *argA*, *argB*, *argC*, *argD*, *argE*, *argF*, *argG*, *argH*, *argI*, *artJ*, *ntpD*
- Nucleotide transport and metabolism (1): *carA*
- Transcription (1): *yagI*

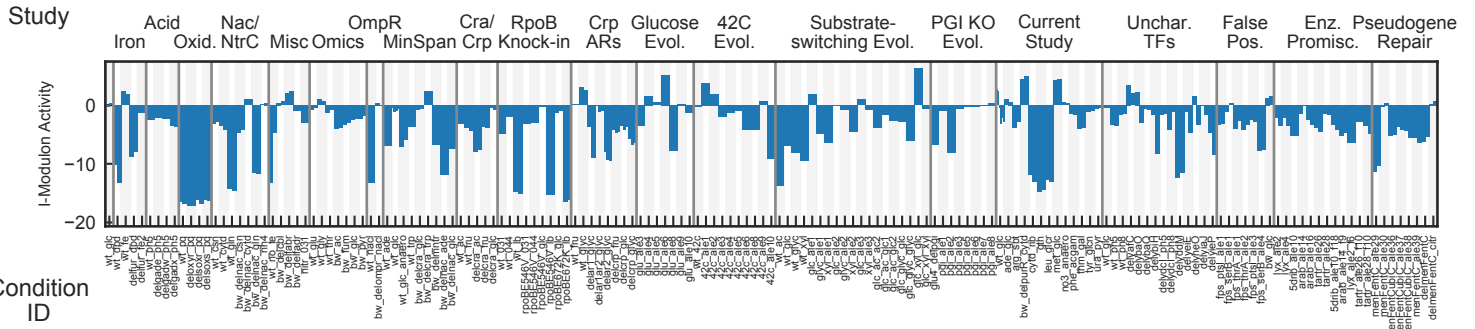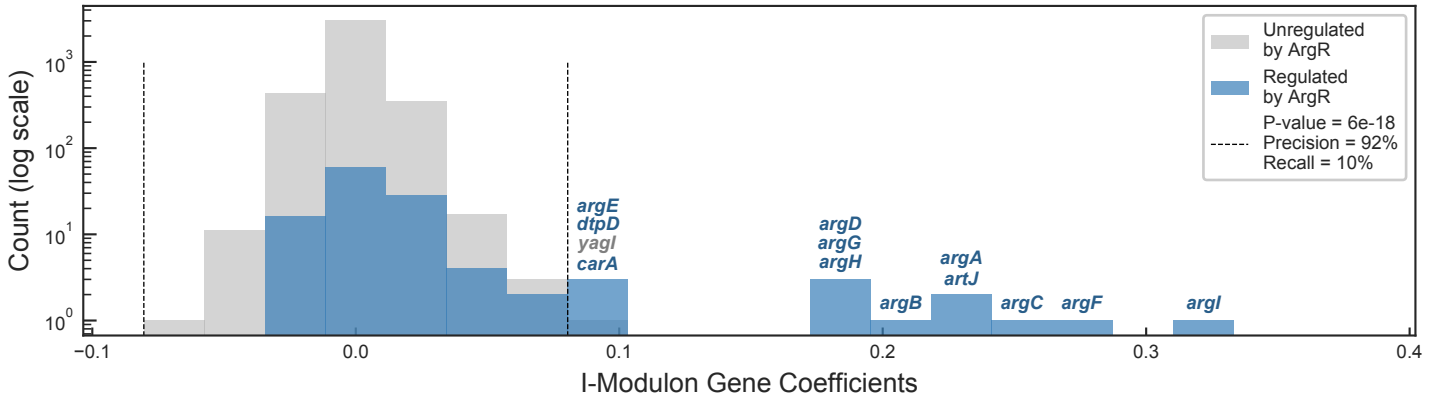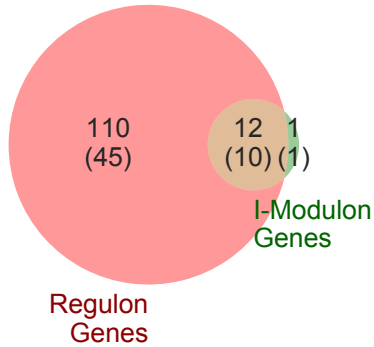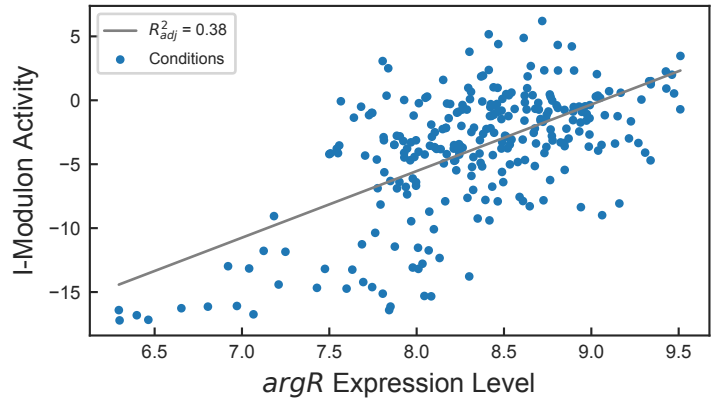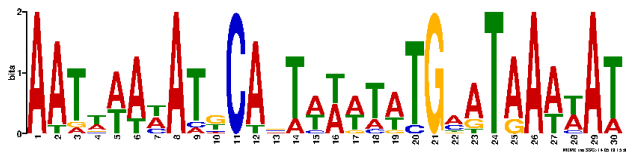

Motif E-value: 9.60e-21  
Operons with Upstream Motif: 91%

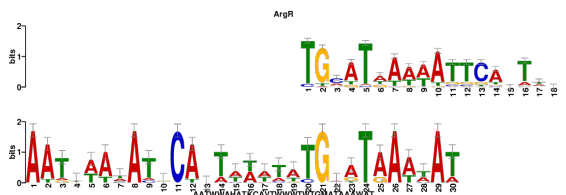

Motif similar to ArgR (E-value: 1.91e-04)

# AtoC I-Modulon

Regulated by: AtoC

Biological Function: Acetoacetate degradation

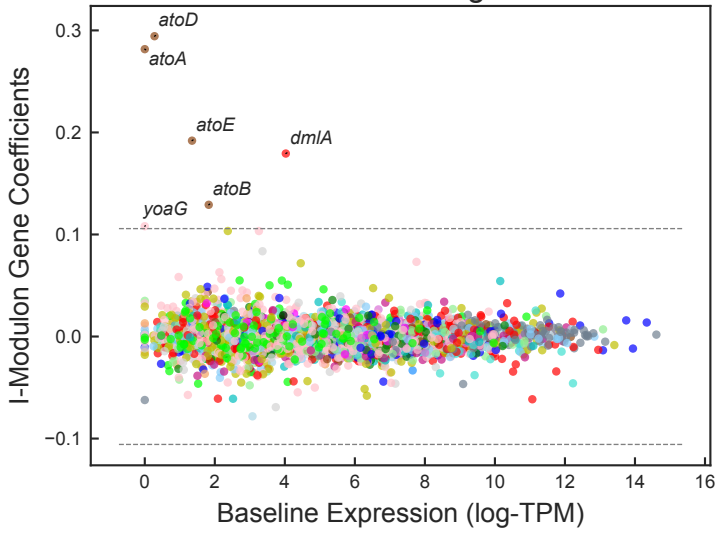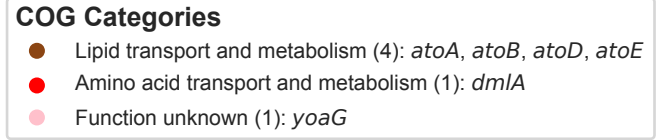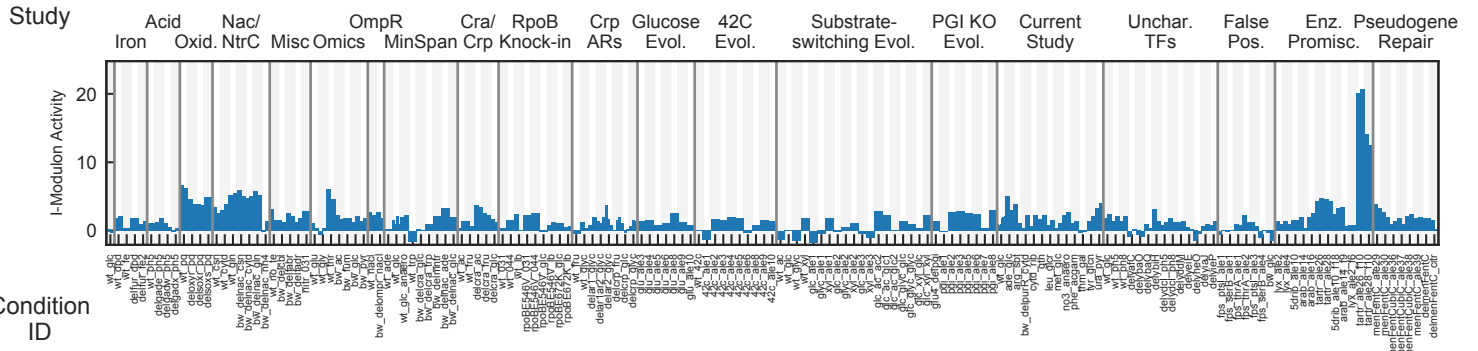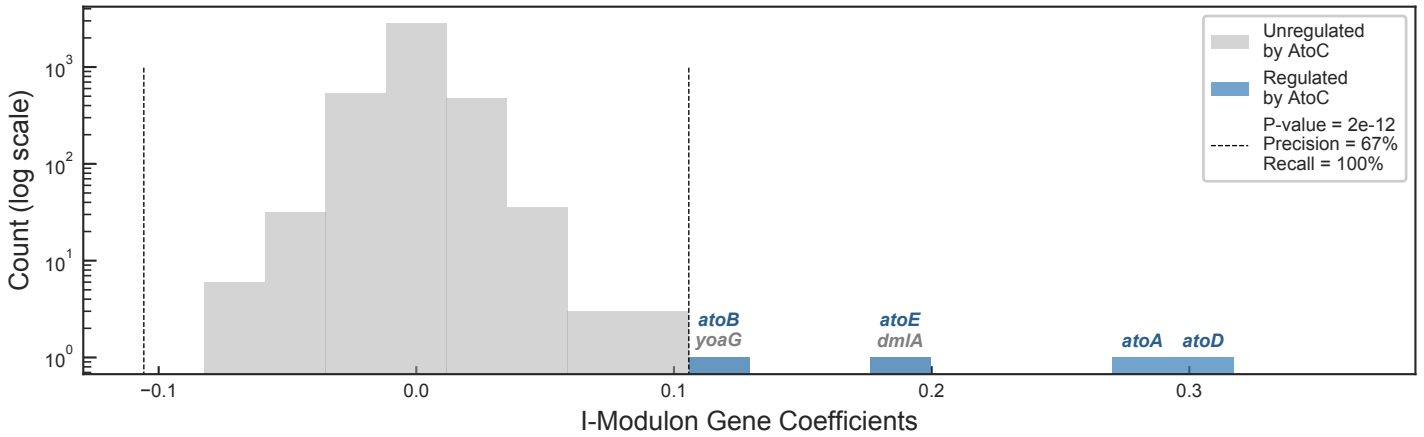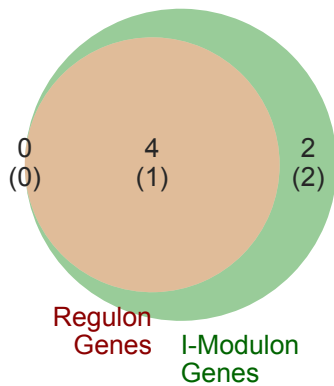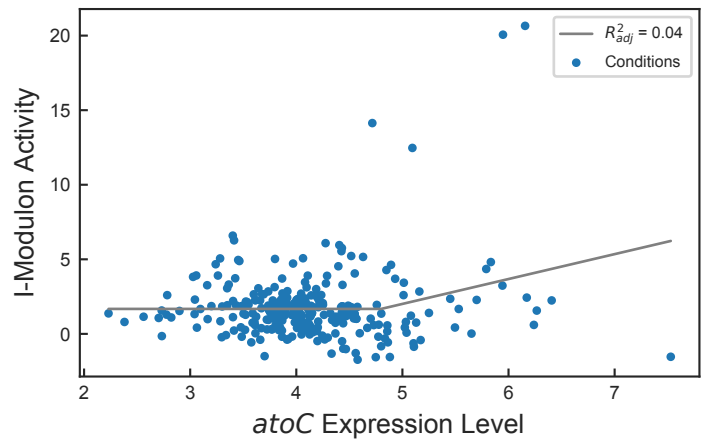

# BW25113 I-Modulon

Biological Function: Transcriptional difference between BW25113 and MG1655

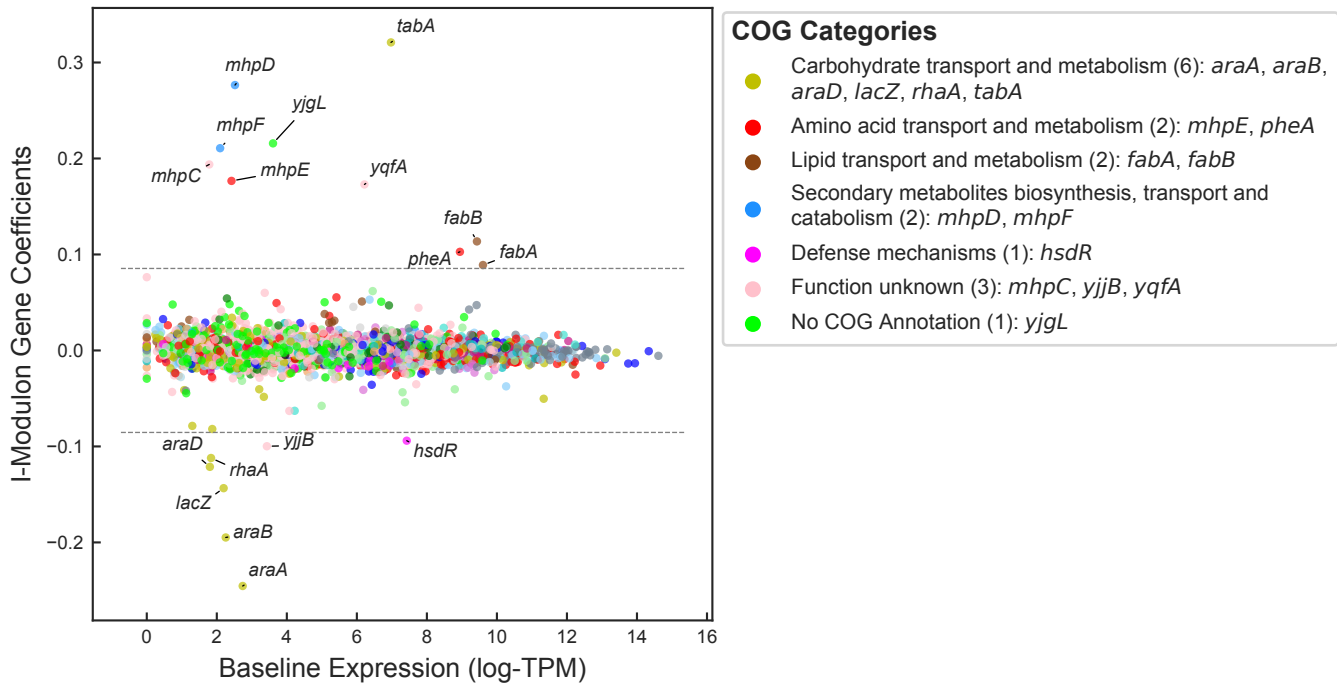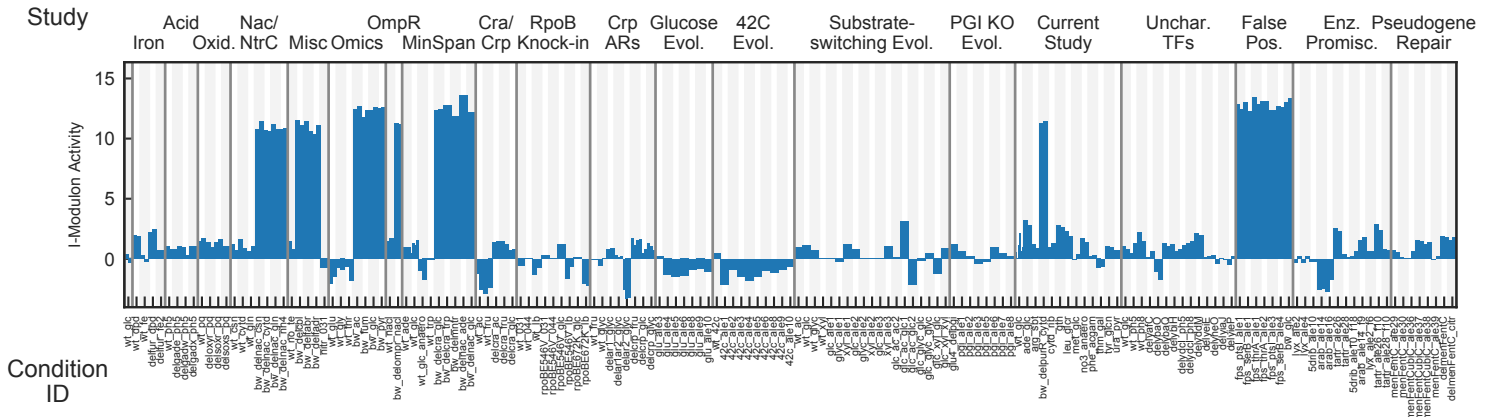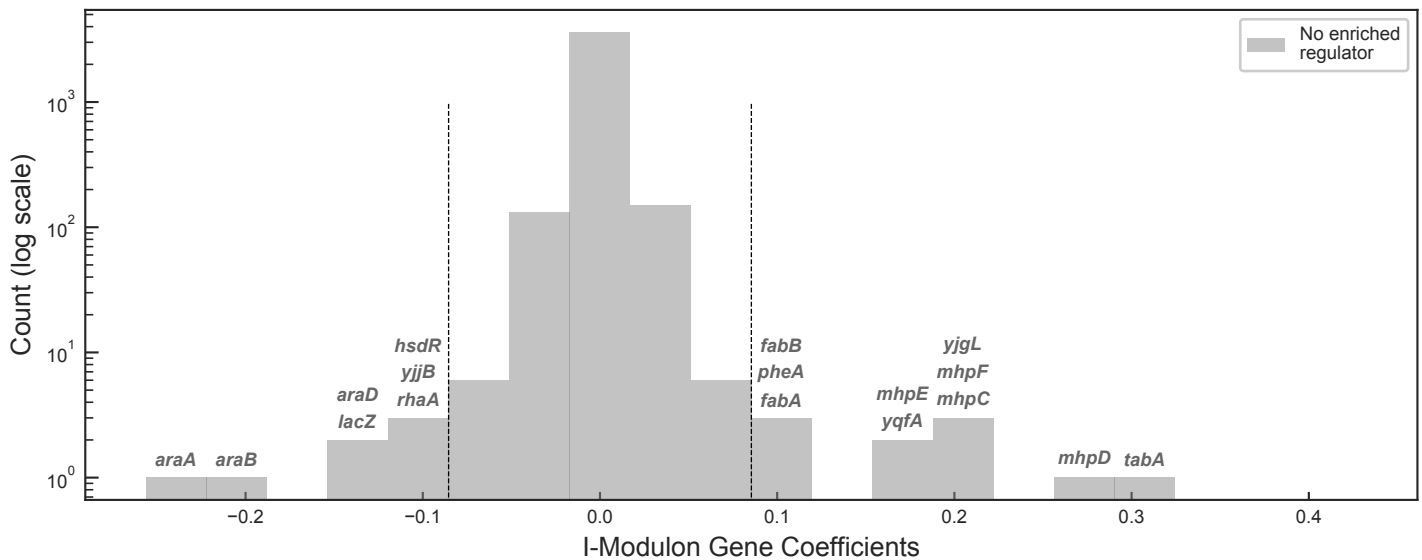

# Cbl + CysB I-Modulon

Regulated by: Cbl and CysB

Biological Function: Aliphatic sulfonate utilization

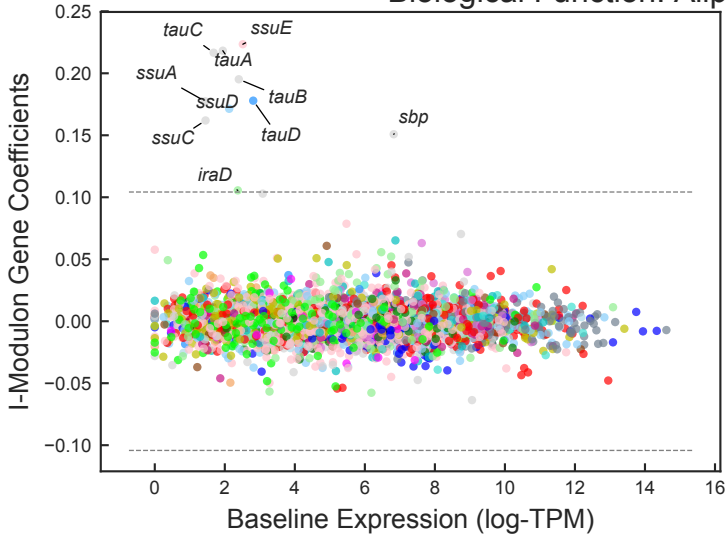

## COG Categories

- Inorganic ion transport and metabolism (6): *sbp*, *ssuA*, *ssuC*, *tauA*, *tauB*, *tauC*
- Energy production and conversion (1): *ssuD*
- Secondary metabolites biosynthesis, transport and catabolism (1): *tauD*
- Transcription (1): *iraD*
- Function unknown (1): *ssuE*

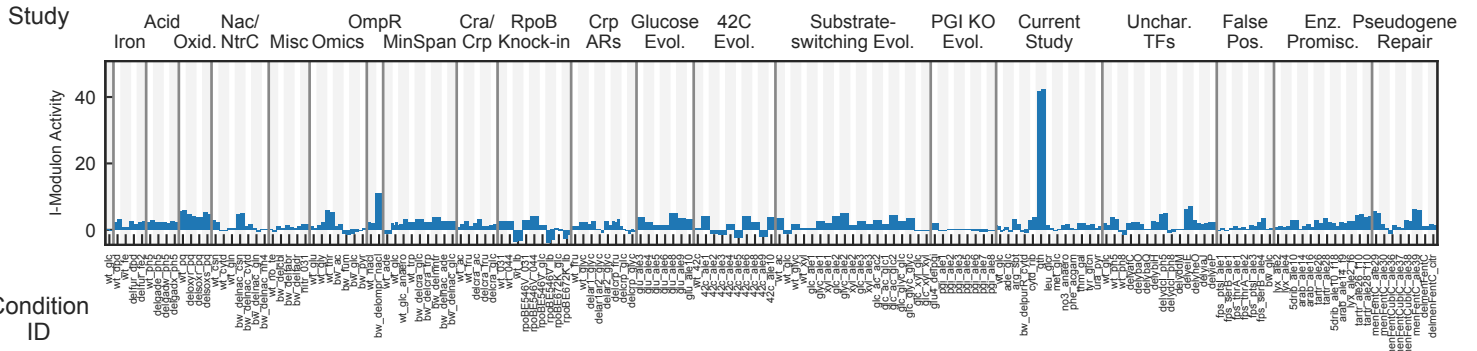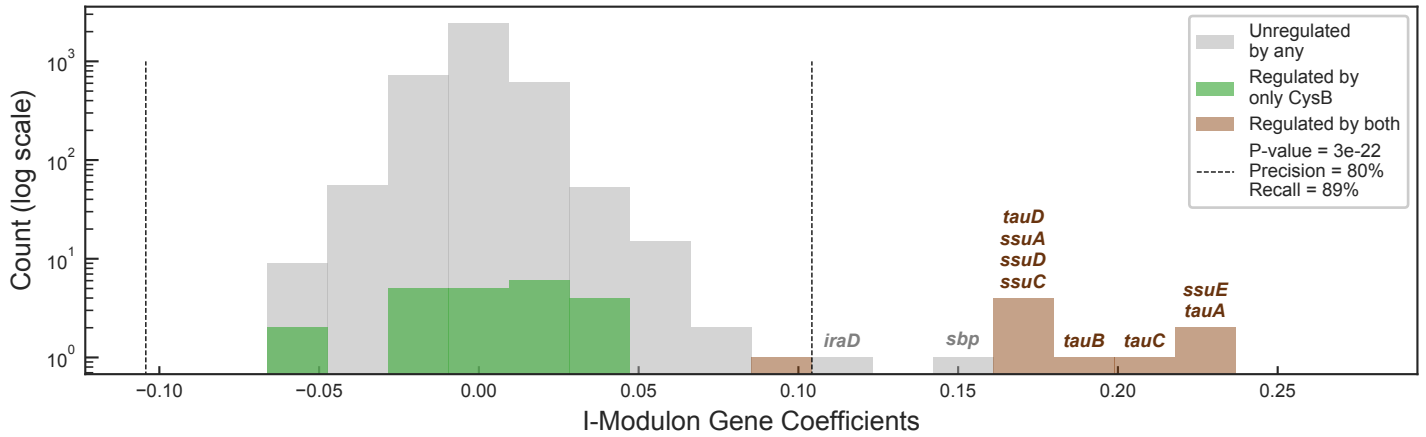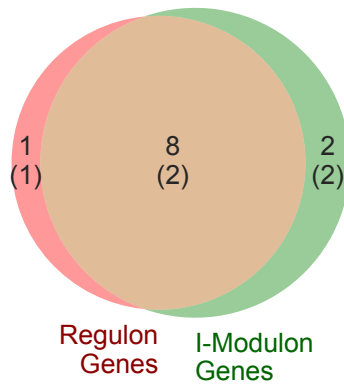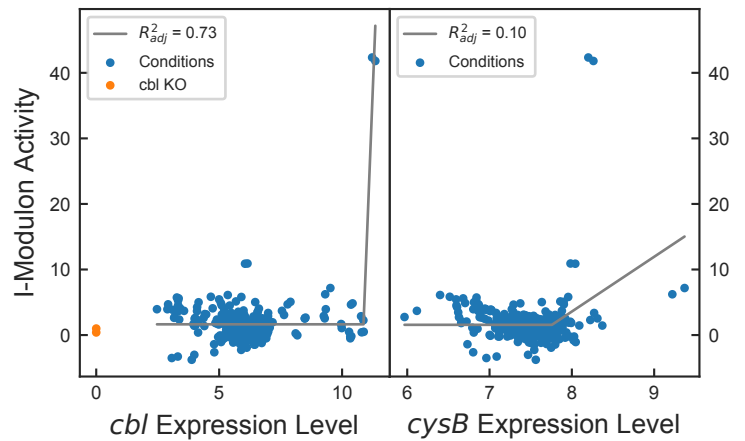

# CdaR I-Modulon

Regulated by: CdaR

Biological Function: Glucarate catabolism

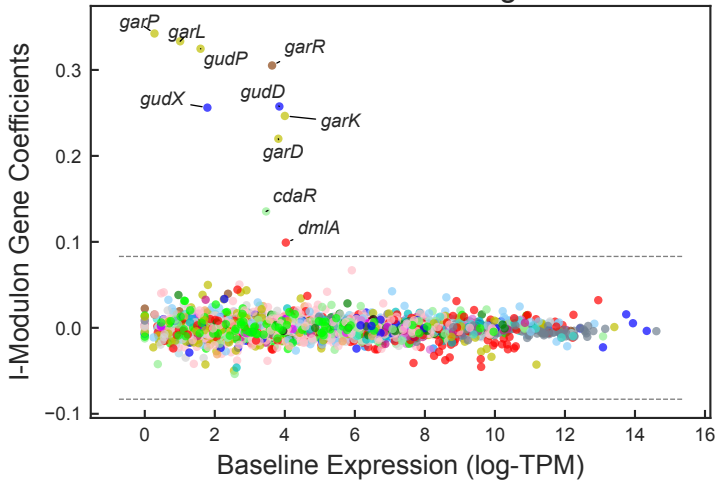

## COG Categories

- Carbohydrate transport and metabolism (5): *garD*, *garK*, *garL*, *garP*, *gudP*
- Cell wall/membrane/envelope biogenesis (2): *gudD*, *gudX*
- Amino acid transport and metabolism (1): *dmIA*
- Lipid transport and metabolism (1): *garR*
- Transcription (1): *cdaR*

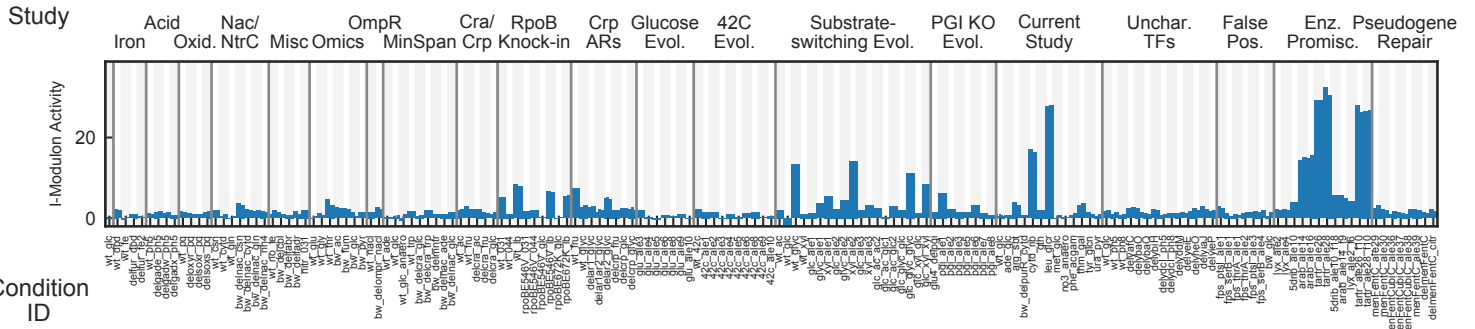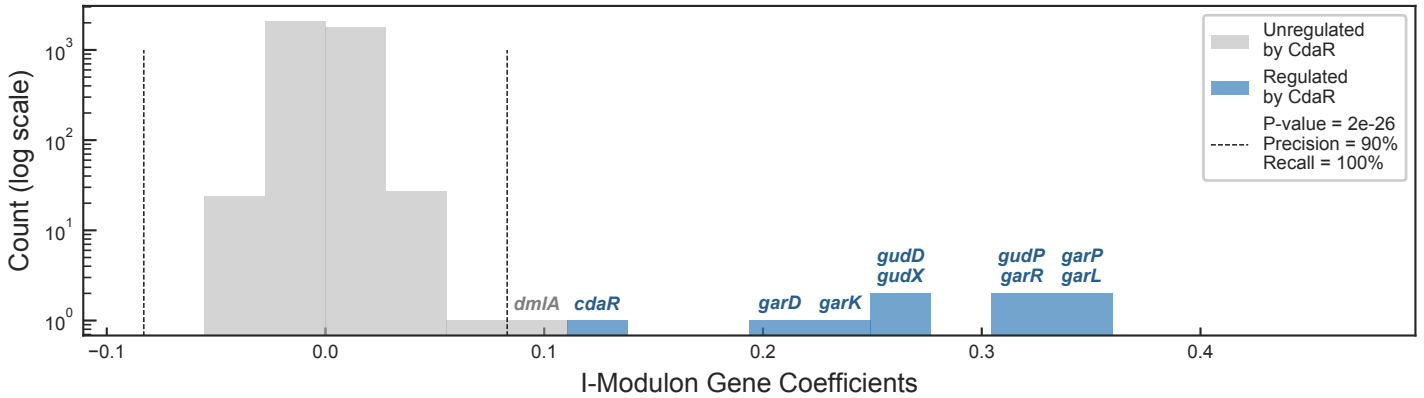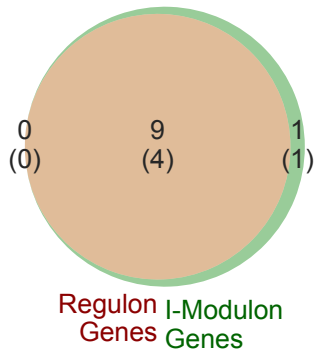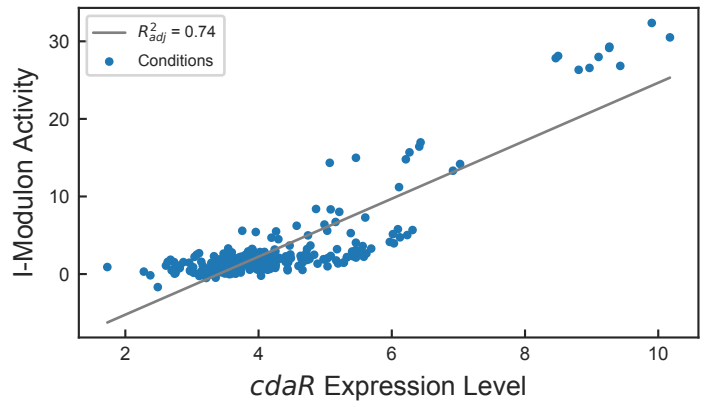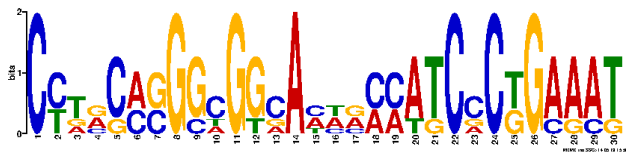

Motif E-value: 2.70e-05  
Operons with Upstream Motif: 100%

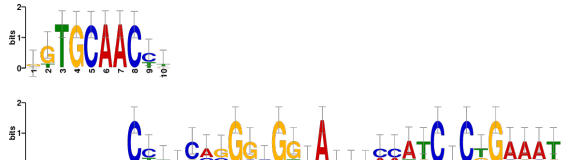

Motif similar to PutA (E-value: 1.53e-04)



# CecR I-Modulon

Regulated by: CecR

Biological Function: Related to antibiotic sensitivity

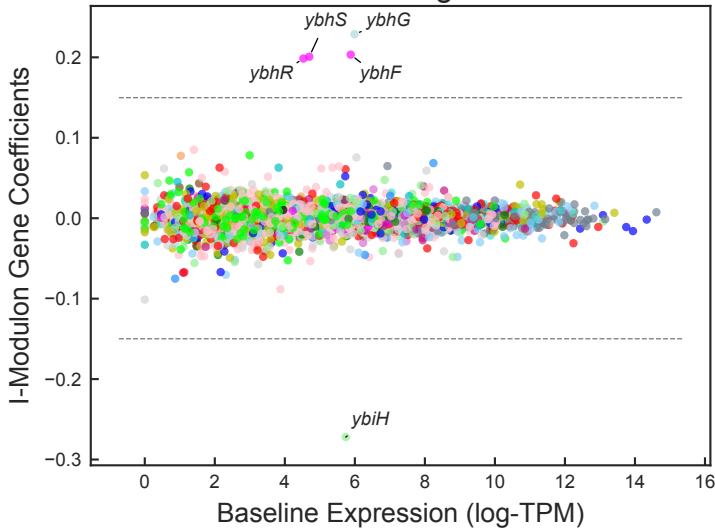

## COG Categories

- Defense mechanisms (3): *ybhF*, *ybhR*, *ybhS*
- Intracellular trafficking, secretion, and vesicular transport (1): *ybhG*
- Transcription (1): *ybiH*

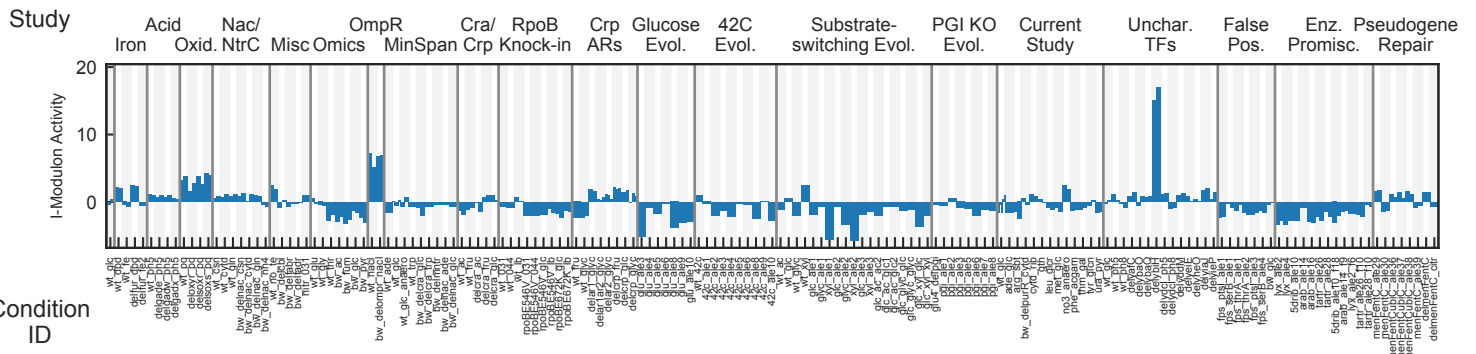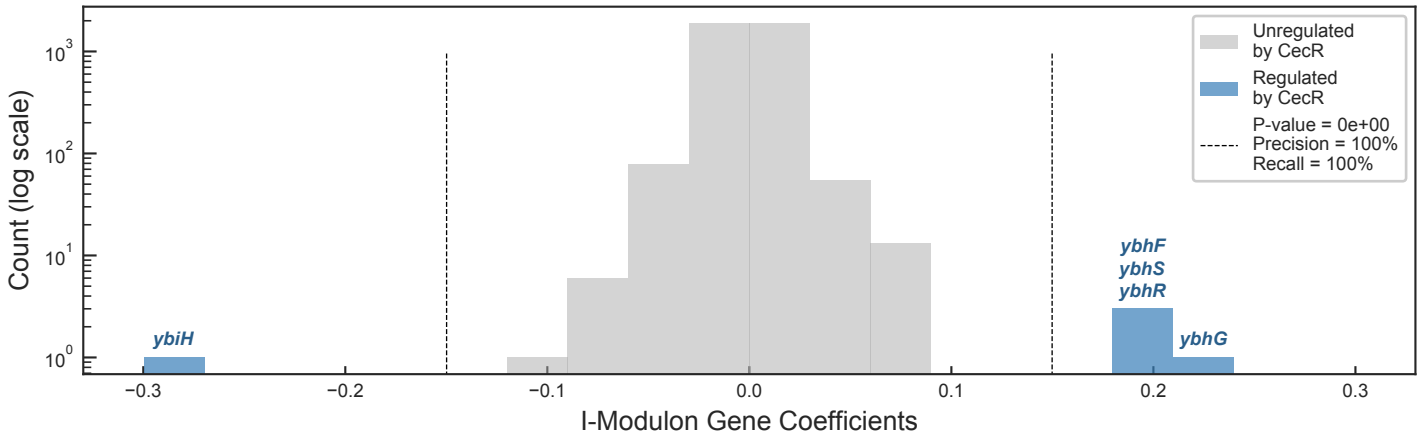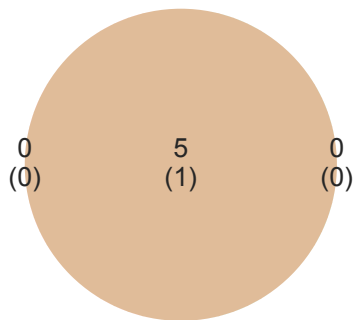

Regulon I-Modulon  
Genes Genes

# Copper I-Modulon

Regulated by: CusR or HprR or CueR  
 Biological Function: Copper homeostasis

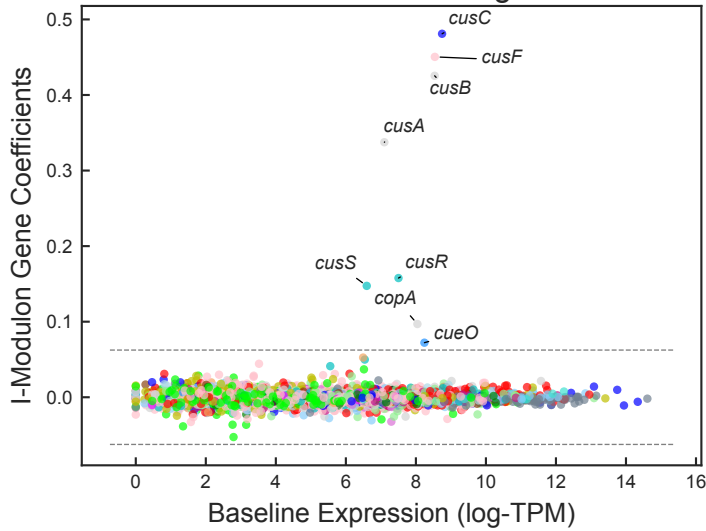

## COG Categories

- Inorganic ion transport and metabolism (3): *copA*, *cusA*, *cusB*
- Signal transduction mechanisms (2): *cusR*, *cusS*
- Cell wall/membrane/envelope biogenesis (1): *cusC*
- Secondary metabolites biosynthesis, transport and catabolism (1): *cueO*
- Function unknown (1): *cusF*

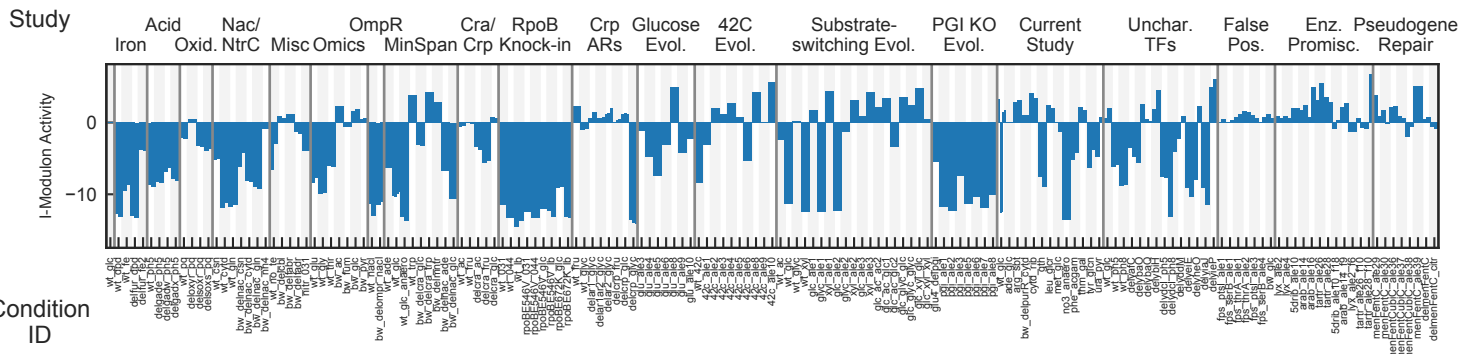

Condition ID

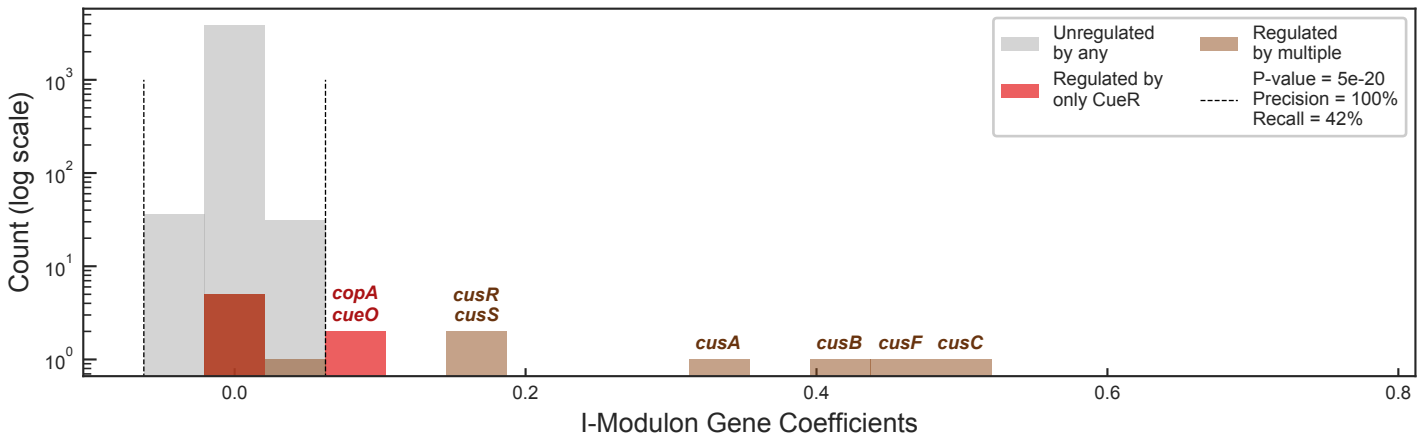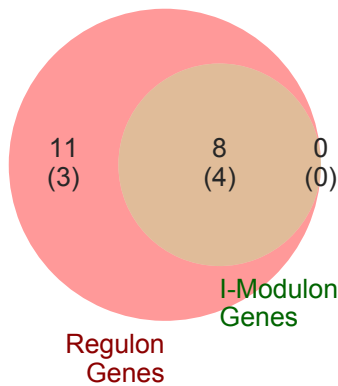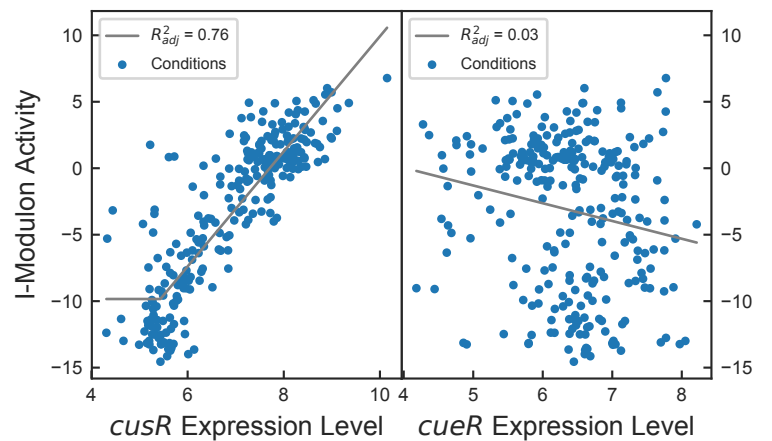

# CpxR I-Modulon

Regulated by: CpxR

Biological Function: Various stress responses

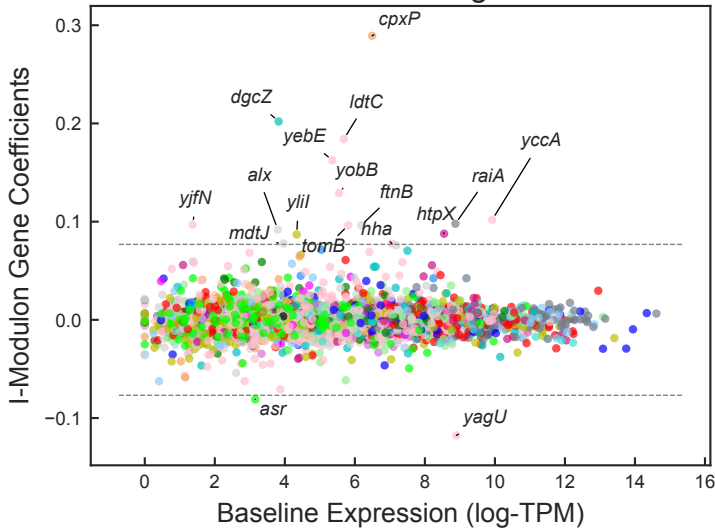

## COG Categories

- Inorganic ion transport and metabolism (3): *alx*, *ftnB*, *mdtJ*
- Carbohydrate transport and metabolism (1): *yilil*
- Cell motility (1): *cpxP*
- Posttranslational modification, protein turnover, chaperones (1): *htpX*
- Signal transduction mechanisms (1): *dgcZ*
- Translation, ribosomal structure and biogenesis (1): *raiA*
- Function unknown (8): *hha*, *ldtC*, *tomB*, *yagU*, *yccA*, *yebE*, *yjfN*, *yobB*
- No COG Annotation (1): *asr*

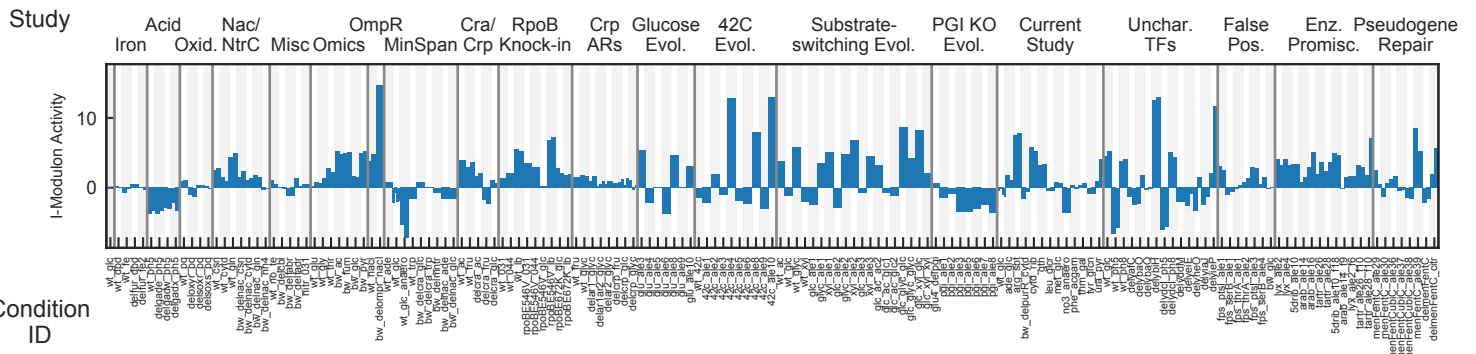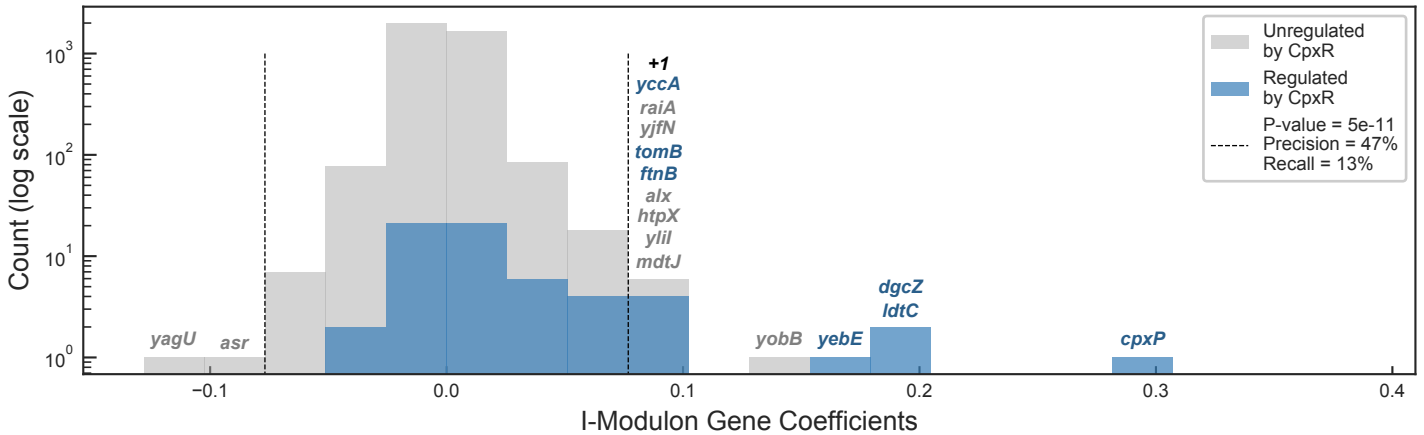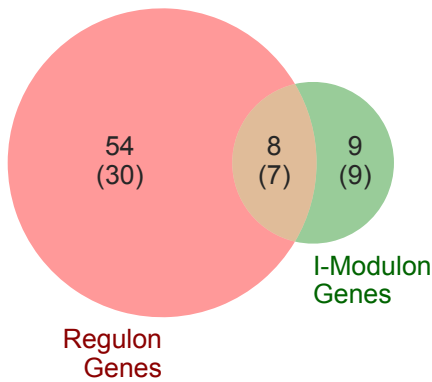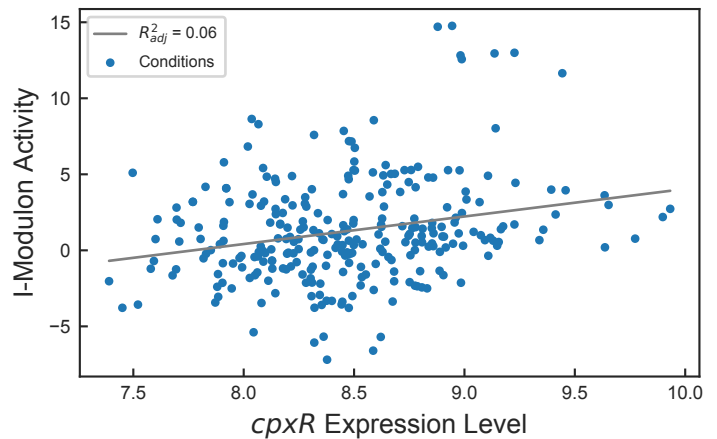

# Cra I-Modulon

Regulated by: Cra

Biological Function: Central carbon metabolism

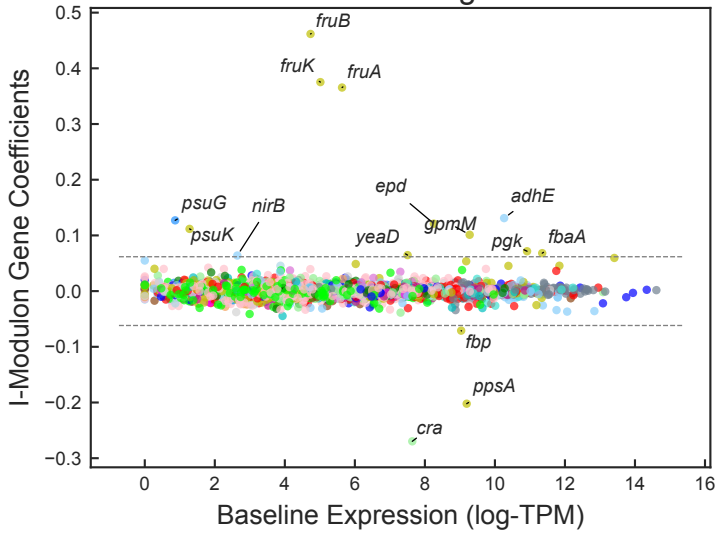

## COG Categories

- Carbohydrate transport and metabolism (11): *epd*, *fbaA*, *fbp*, *fruA*, *fruB*, *fruK*, *gpmM*, *pgk*, *ppsA*, *psuK*, *yeaD*
- Energy production and conversion (2): *adhE*, *nirB*
- Secondary metabolites biosynthesis, transport and catabolism (1): *psuG*
- Transcription (1): *cra*

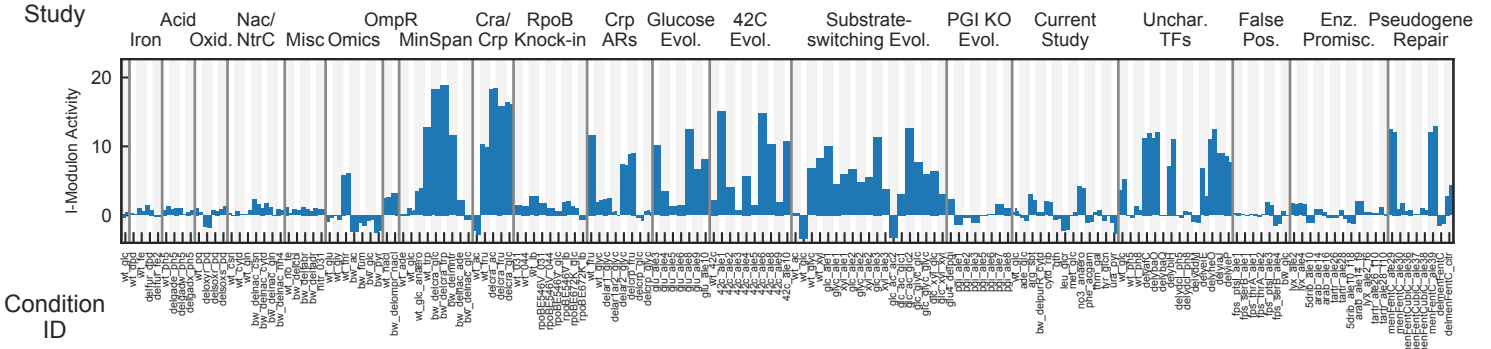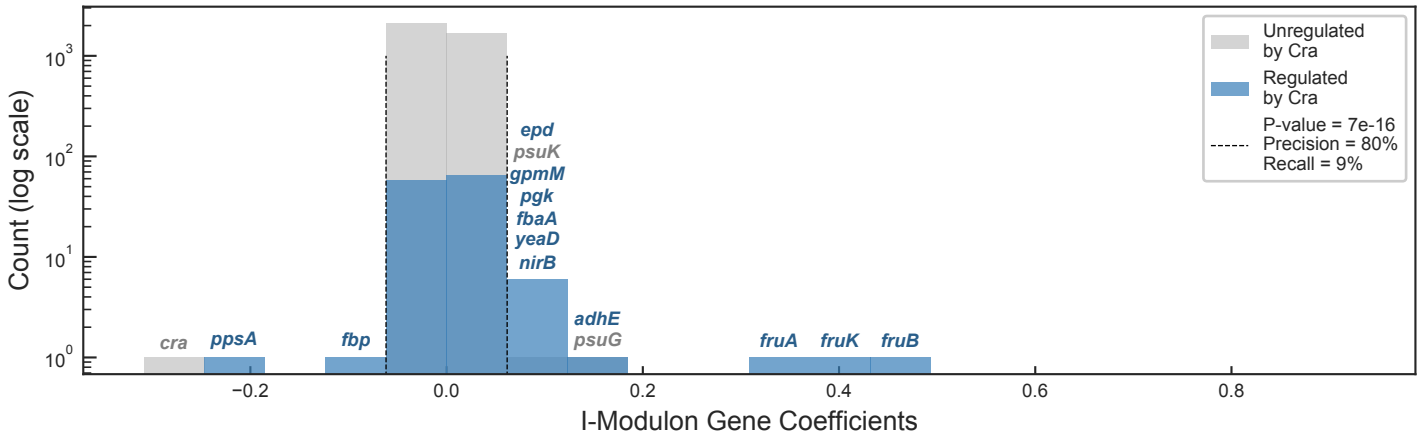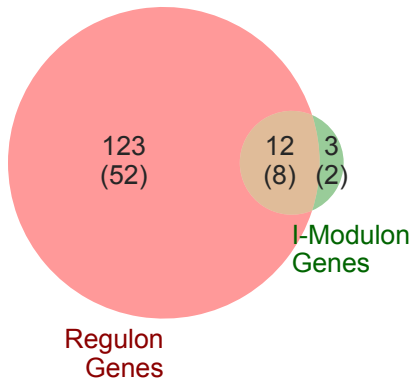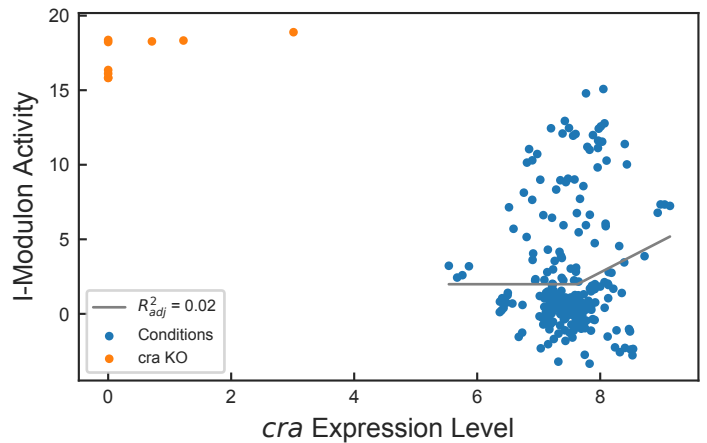

# Crp - 1 I-Modulon

Regulated by: Crp

Biological Function: Miscellaneous functions

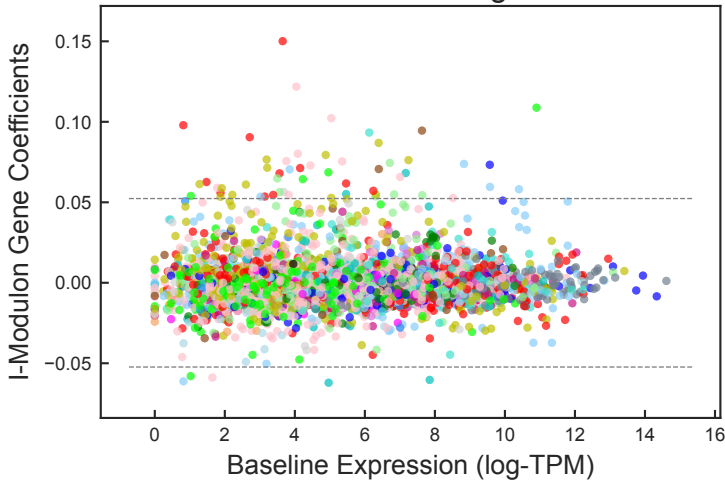

## COG Categories

- Carbohydrate transport and metabolism (12): *agaV, kbaZ, mtlA, mtlD, nanT, psuK, rbsD, rpiB, treB, uidA, uxaC, ydcS*
- Amino acid transport and metabolism (11): *ansB, aspA, nanA, tnaA, tnaB, yagE, yagF, ycaM, ydcT, ydjL, ygiS*
- Energy production and conversion (6): *aldA, aldB, rutE, sdhC, sucD, ykgE*
- Transcription (6): *cra, cytR, galS, mtlR, yebK, ygeV*
- Other (25): *bssR, cstA, phoH, uspC, acs, yqeF, mepS, ydcU, rihA, actP, aphA, bax, dcuB, fadH, mtfA, ybhQ, ydcJ, yfbM, yjch, ytfJ + 5*

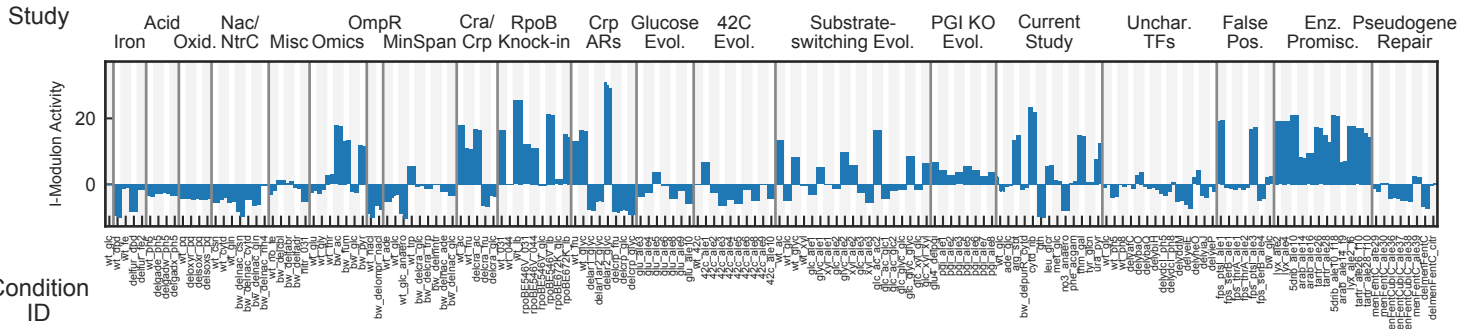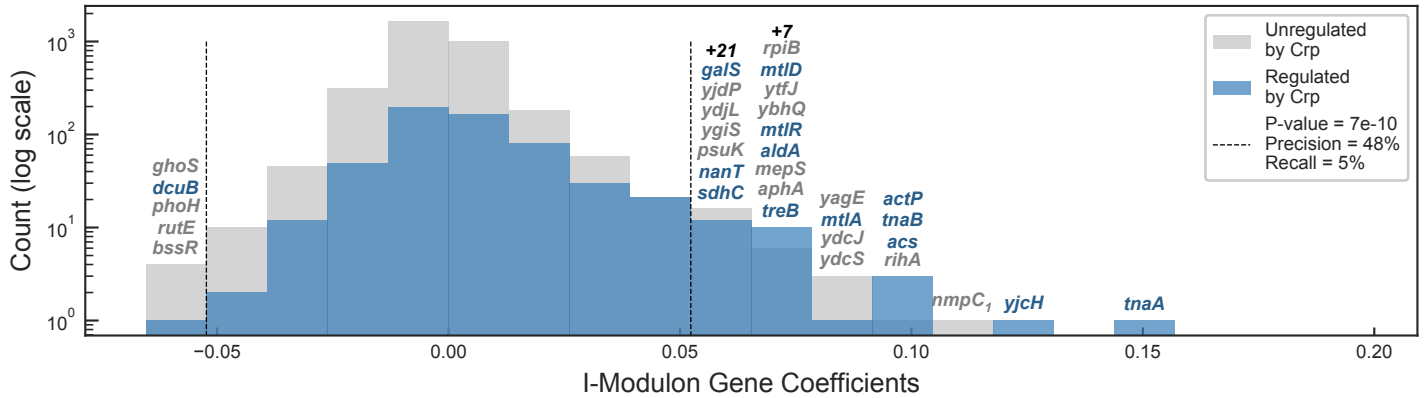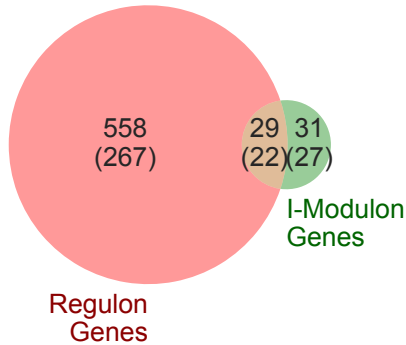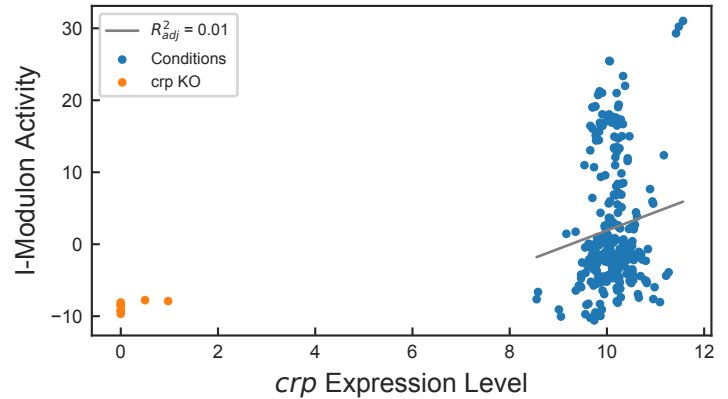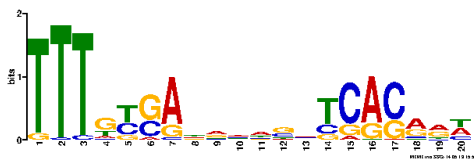

Motif E-value: 5.30e-07  
Operons with Upstream Motif: 83%

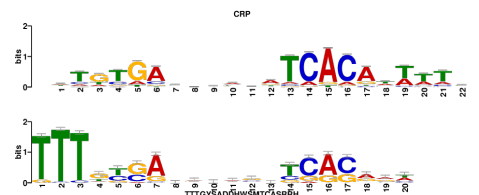

Motif similar to CRP (E-value: 7.82e-09)

# Crp - 2 I-Modulon

Regulated by: Crp

Biological Function: Various carbon source catabolism

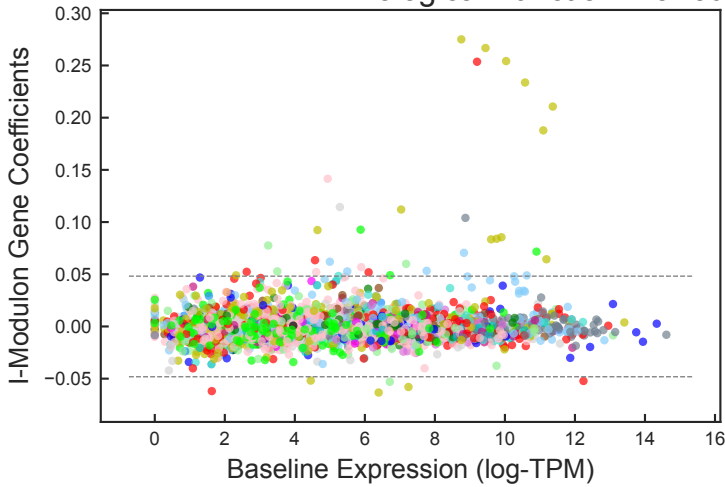

## COG Categories

- Carbohydrate transport and metabolism (16): *gatA*, *gatB*, *gatC<sub>1</sub>*, *gatC<sub>2</sub>*, *gatY*, *gatZ*, *glpT*, *manX*, *manY*, *manZ*, *mgIB*, *mgIC*, *mtIA*, *mtID*, *ptsG*, *ynfM*
- Amino acid transport and metabolism (6): *gatD*, *idnD*, *ilvC*, *nikA*, *pepE*, *sdaC*
- Energy production and conversion (5): *aldA*, *glpQ*, *gpr*, *pck*, *sdhA*
- Transcription (4): *cohE*, *galS*, *lgoR*, *mtIR*
- Other (9): *mgIA*, *cdd*, *raiA*, *ychH*, *ydCH*, *yhfK*, *gatR<sub>1</sub>*, *nmpC<sub>1</sub>*, *ymfI*

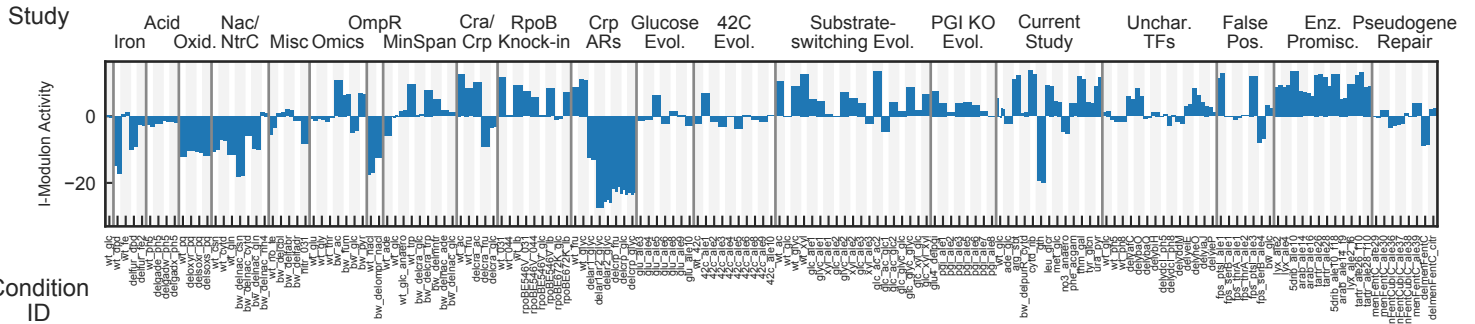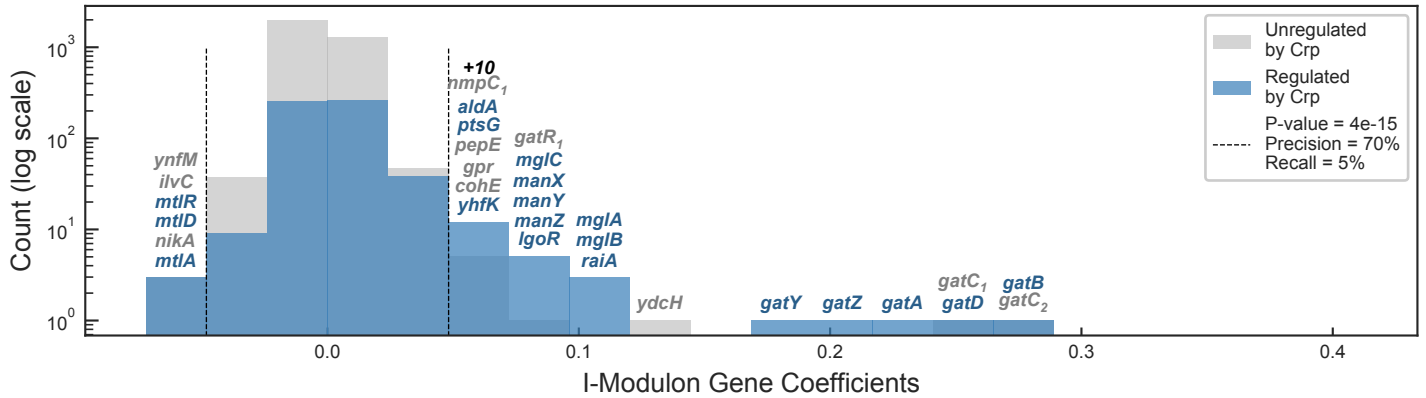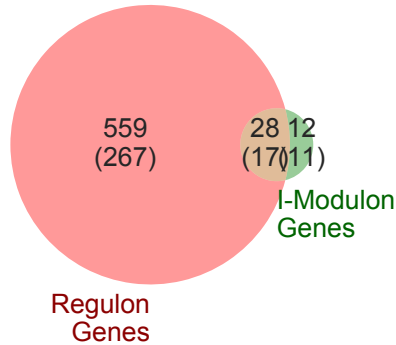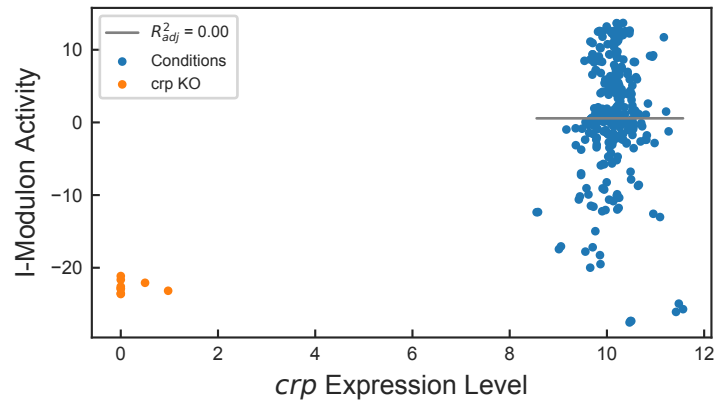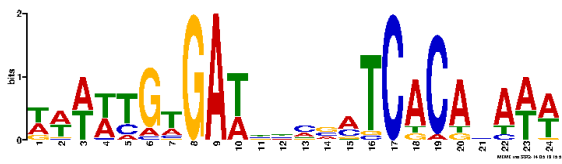

Motif E-value: 1.30e-10  
Operons with Upstream Motif: 63%

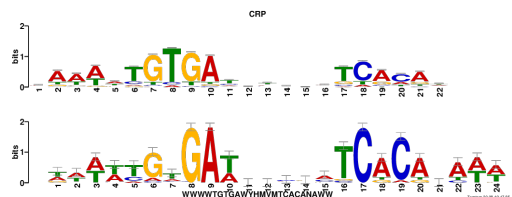

Motif similar to CRP (E-value: 1.14e-09)

# CsqR I-Modulon

Regulated by: CsqR

Biological Function: Sulfoquinovose catabolism

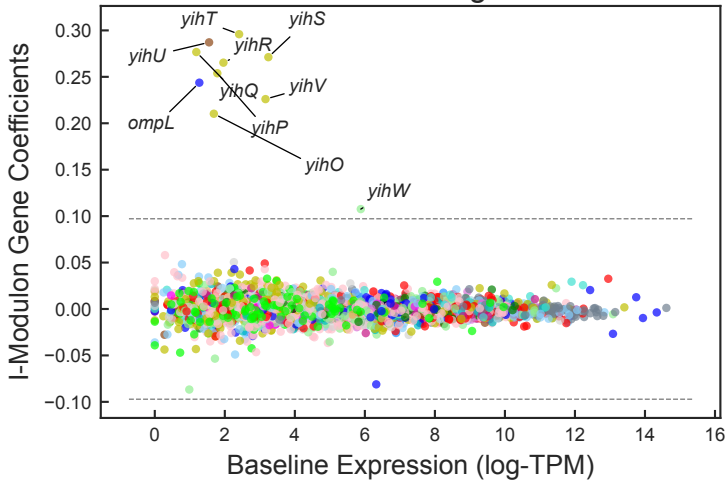

## COG Categories

- Carbohydrate transport and metabolism (7): *yihO*, *yihP*, *yihQ*, *yihR*, *yihS*, *yihT*, *yihV*
- Cell wall/membrane/envelope biogenesis (1): *ompL*
- Lipid transport and metabolism (1): *yihU*
- Transcription (1): *yihW*

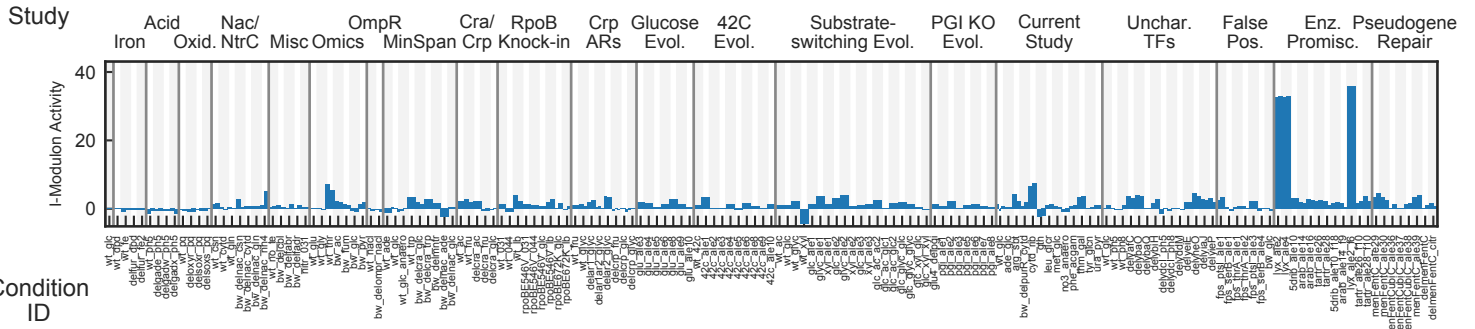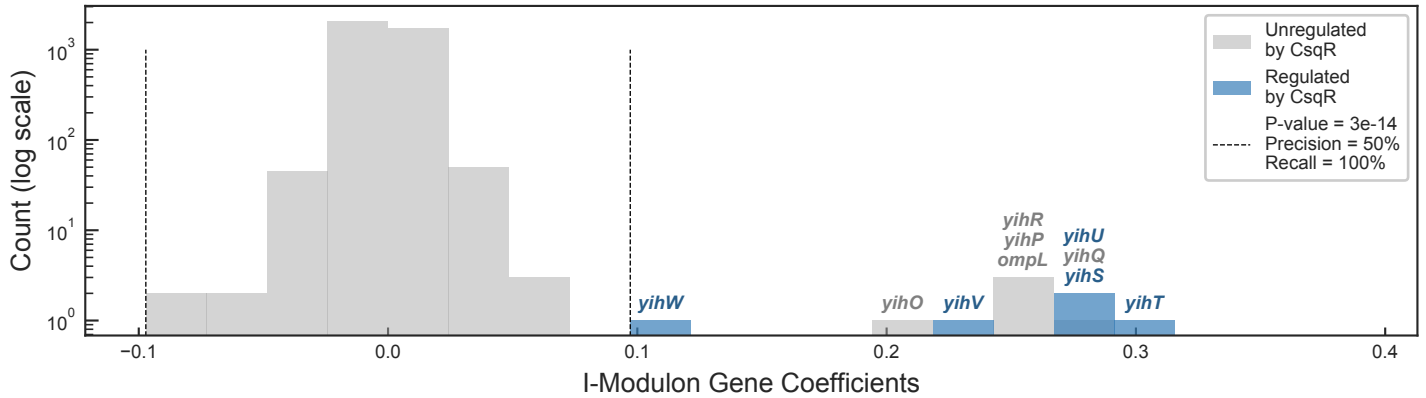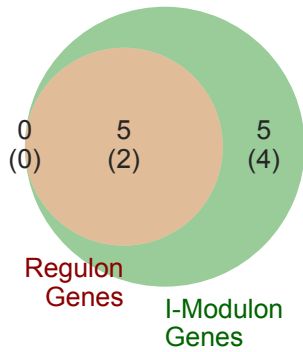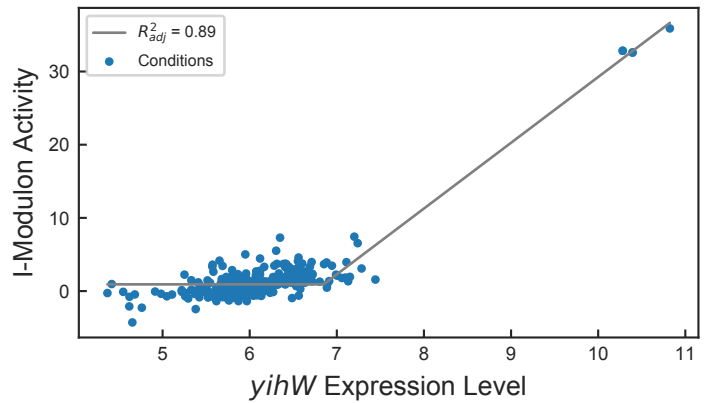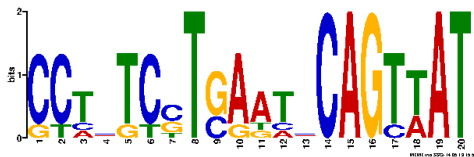

Motif E-value: 4.50e-04

Operons with Upstream Motif: 100%

# CysB I-Modulon

Regulated by: CysB

Biological Function: Inorganic sulfate assimilation

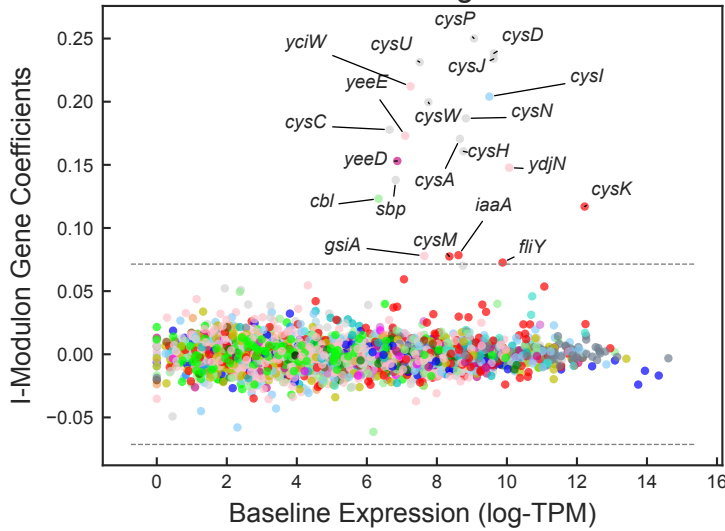

## COG Categories

- Inorganic ion transport and metabolism (10): *cysA*, *cysC*, *cysD*, *cysH*, *cysJ*, *cysN*, *cysP*, *cysU*, *cysW*, *sbp*
- Amino acid transport and metabolism (4): *cysK*, *cysM*, *fliY*, *iaaA*
- Energy production and conversion (1): *cysI*
- Posttranslational modification, protein turnover, chaperones (1): *yeeD*
- Transcription (1): *cbl*
- Function unknown (4): *gsiA*, *yciW*, *ydjN*, *yeeE*

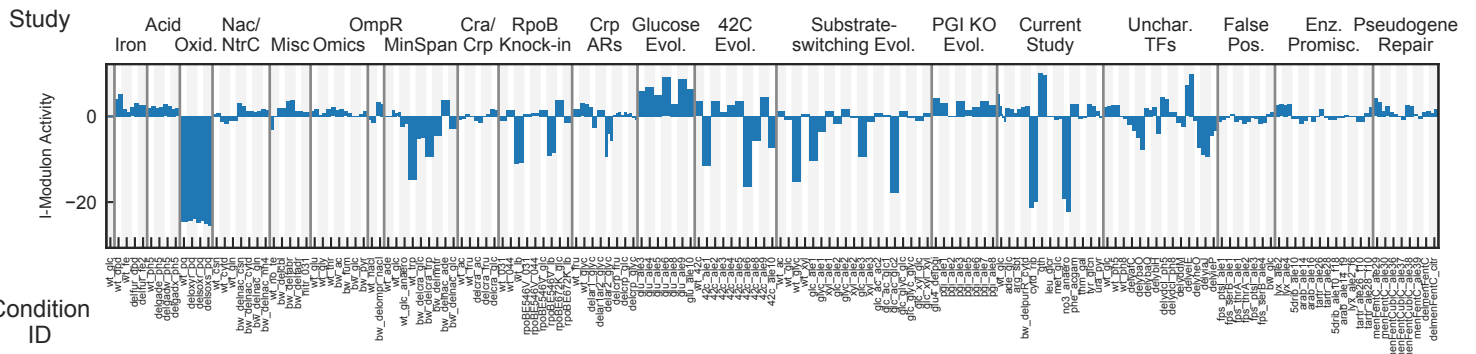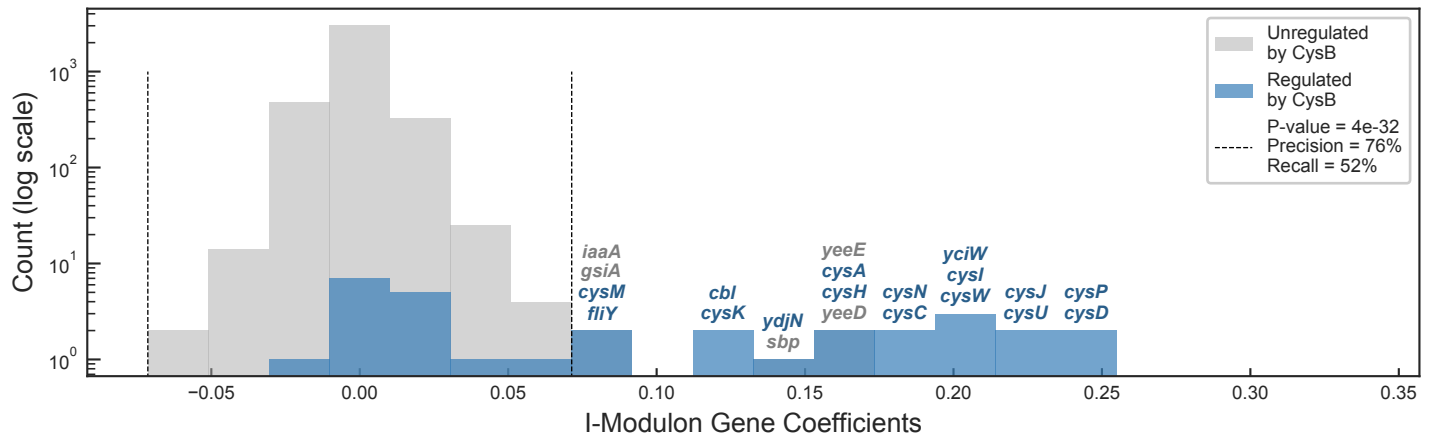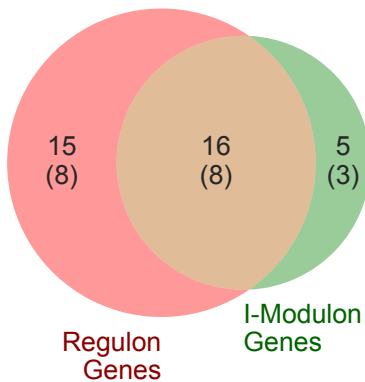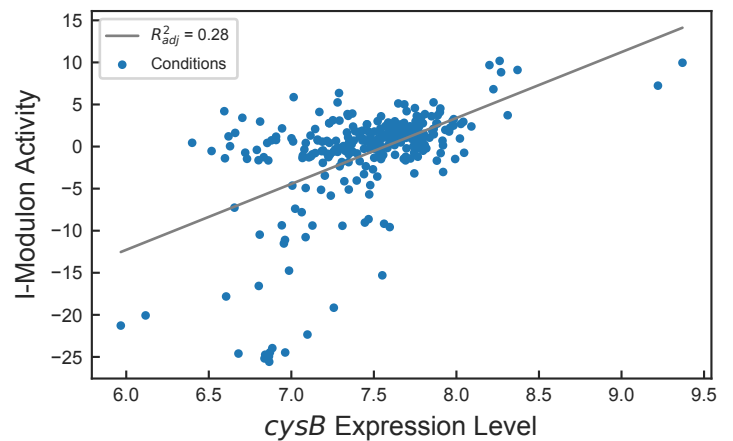



# DhaR/Mlc I-Modulon

Regulated by: DhaR or Mlc

Biological Function: Dihydroxyacetone kinase and phosphotransferase systems

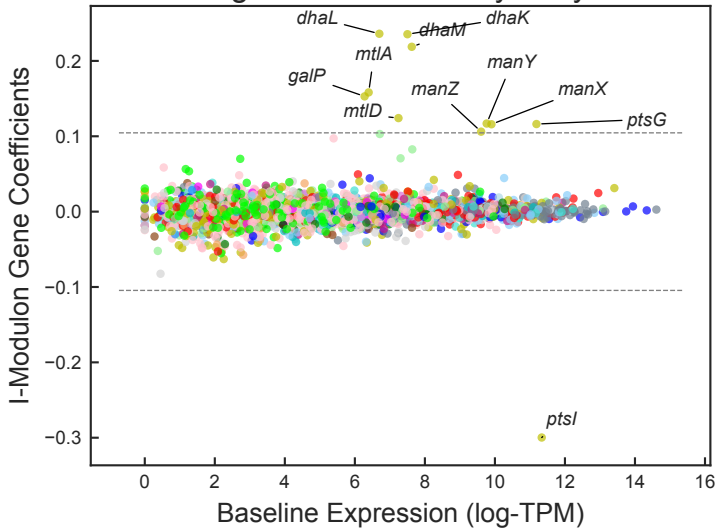

## COG Categories

● Carbohydrate transport and metabolism (11): *dhaK*, *dhaL*, *dhaM*, *galP*, *manX*, *manY*, *manZ*, *mtlA*, *mtlD*, *ptsG*, *ptsI*

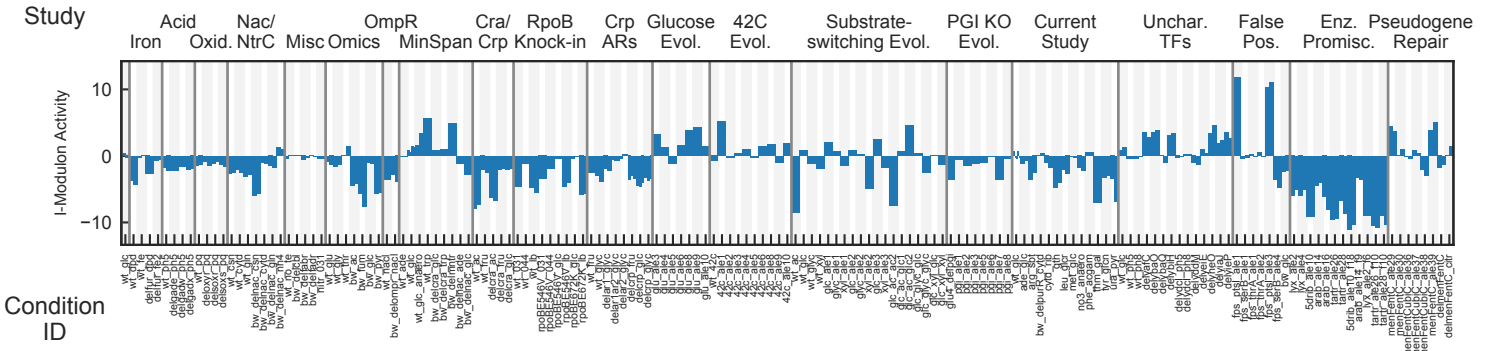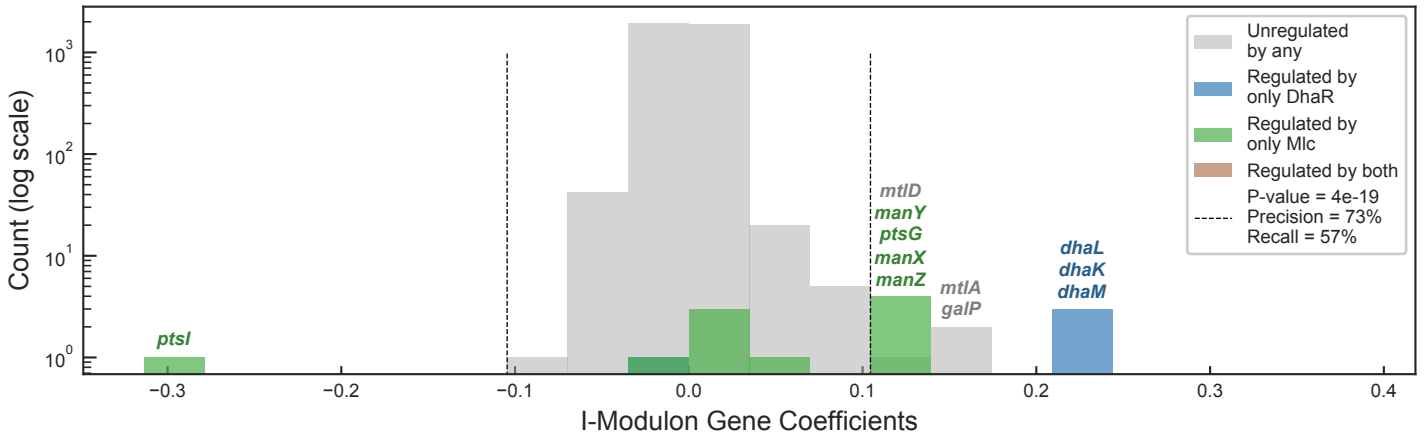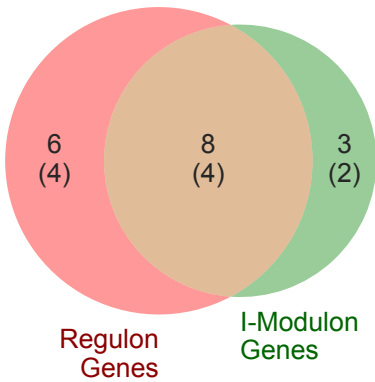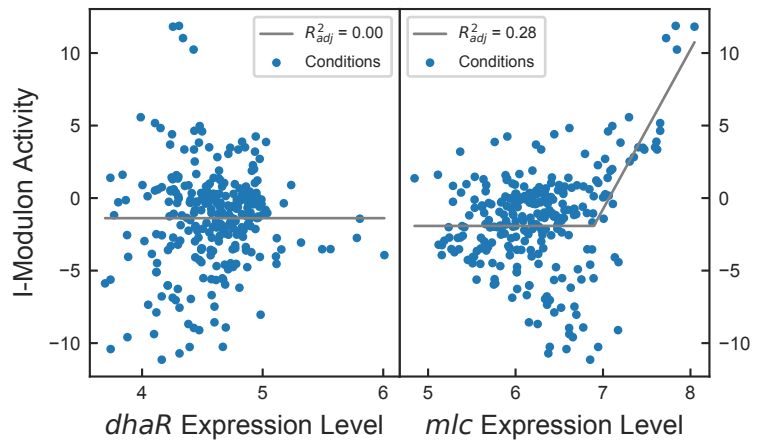

# EvgA I-Modulon

Regulated by: EvgA

Biological Function: Acid and osmotic stress response

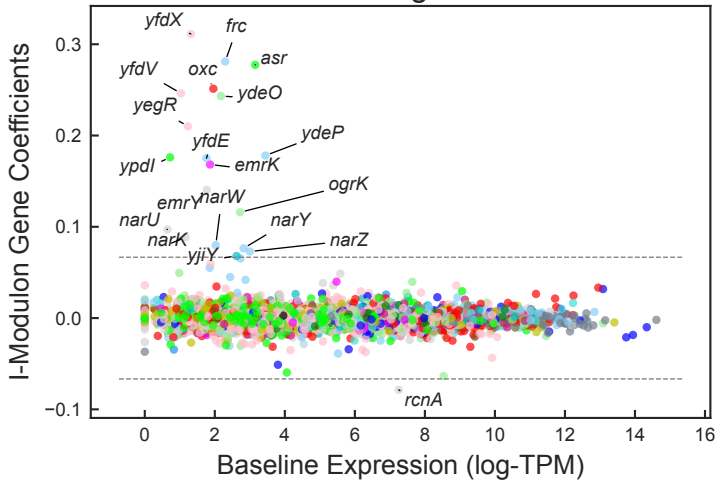

## COG Categories

- Energy production and conversion (6): *frc*, *narW*, *narY*, *narZ*, *ydeP*, *yfdE*
- Inorganic ion transport and metabolism (4): *emrY*, *narK*, *narU*, *rcnA*
- Transcription (2): *ogrK*, *ydeO*
- Amino acid transport and metabolism (1): *oxc*
- Defense mechanisms (1): *emrK*
- Signal transduction mechanisms (1): *yjiY*
- Function unknown (3): *yegR*, *yfdV*, *yfdX*
- No COG Annotation (2): *asr*, *ypdI*

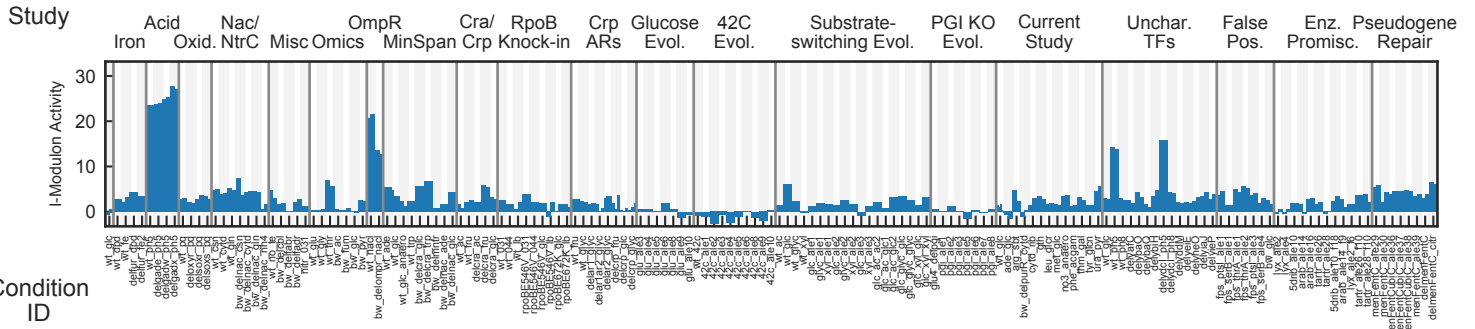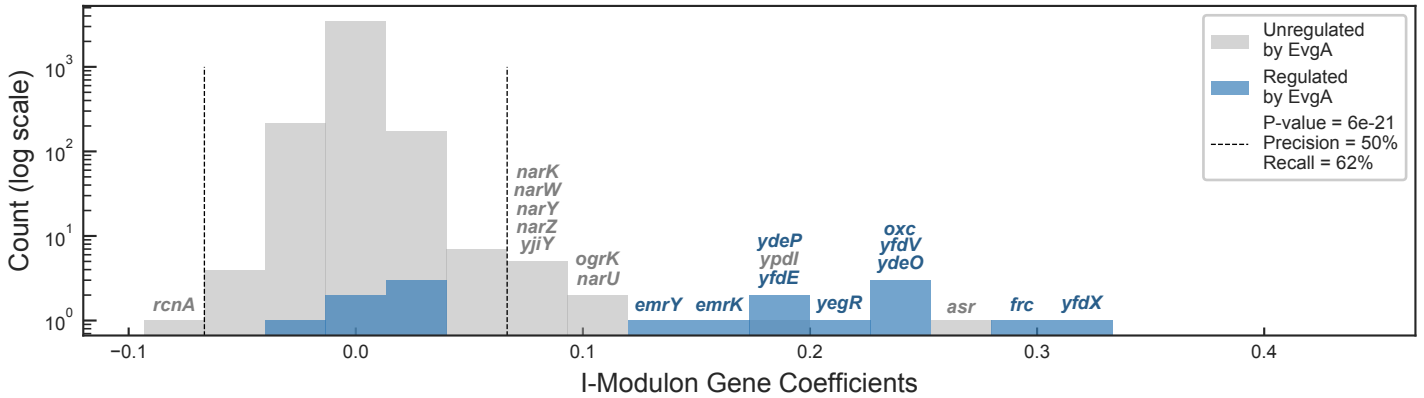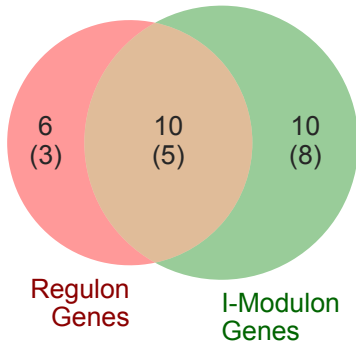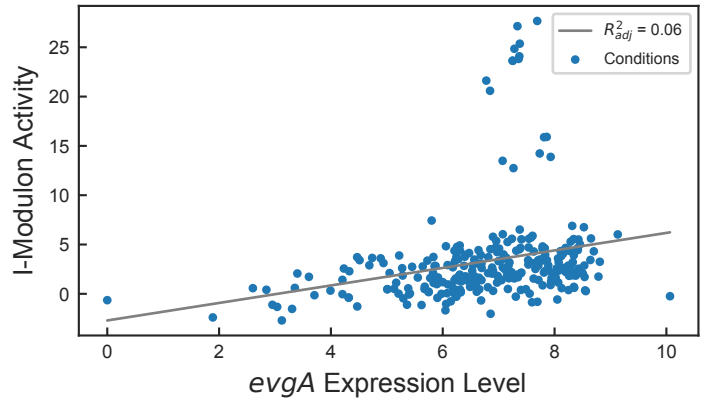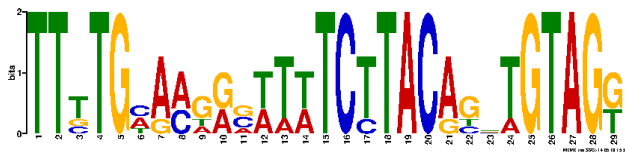

Motif E-value: 2.20e-05  
Operons with Upstream Motif: 38%

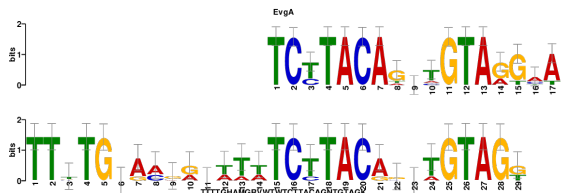

Motif similar to EvgA (E-value: 6.32e-12)

# ExuR/FucR I-Modulon

Regulated by: ExuR or FucR

Biological Function: D-galacturonate and L-fucose catabolism

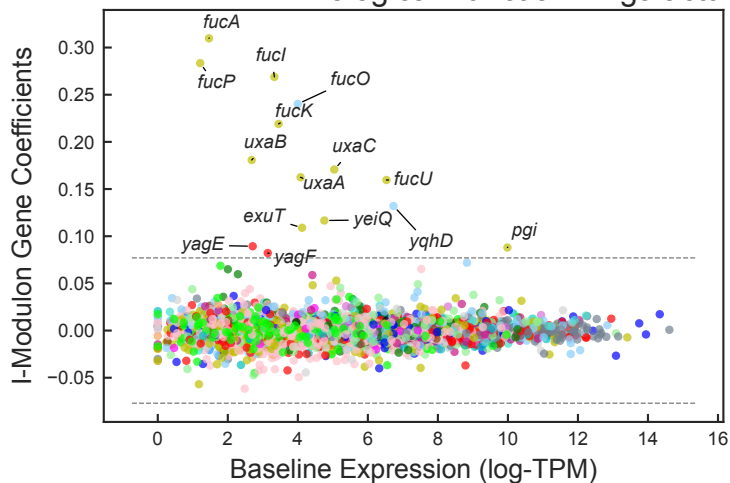

## COG Categories

- Carbohydrate transport and metabolism (11): *exuT*, *fucA*, *fucI*, *fucK*, *fucP*, *fucU*, *pgi*, *uxaA*, *uxaB*, *uxaC*, *yqiQ*
- Amino acid transport and metabolism (2): *yagE*, *yagF*
- Energy production and conversion (2): *fucO*, *yqhD*

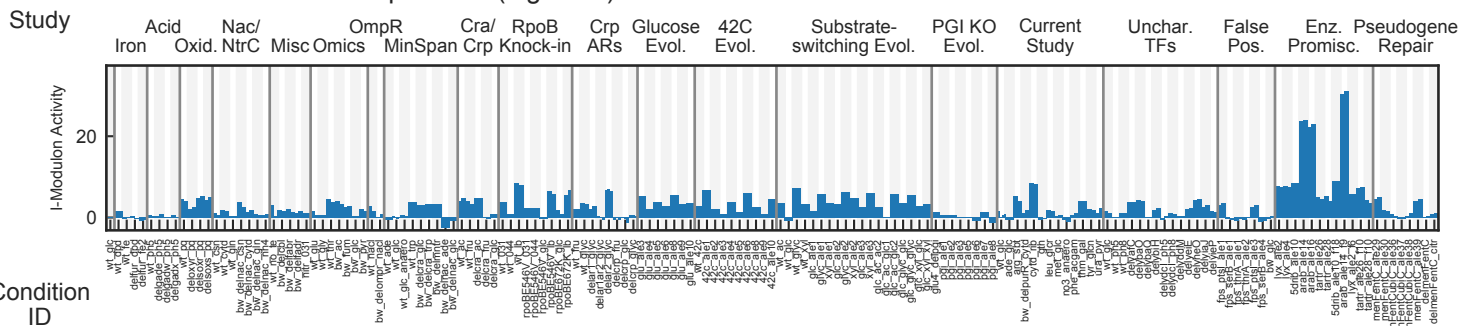

Condition ID

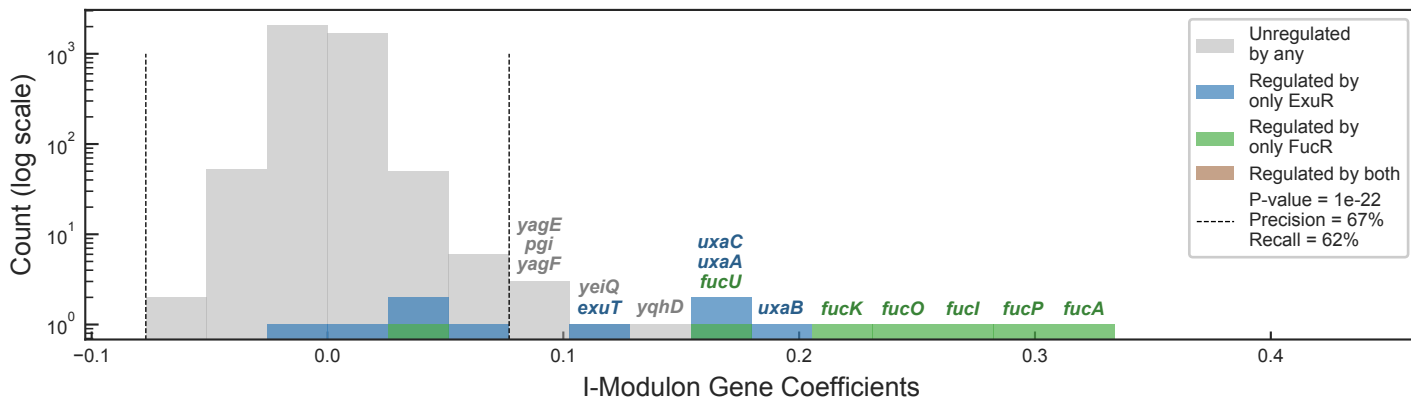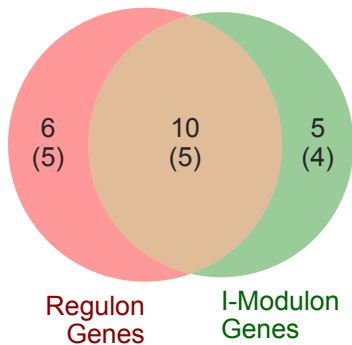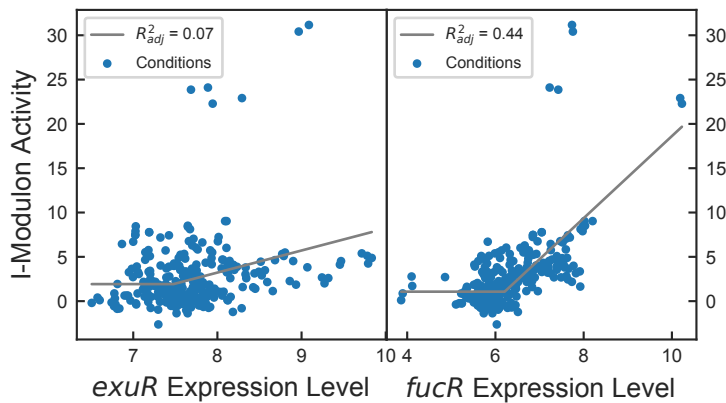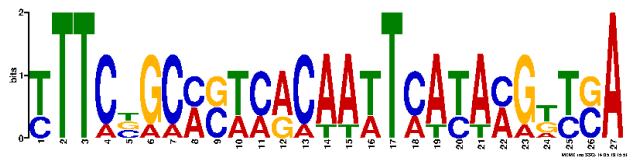

Motif E-value: 1.10e-04

Operons with Upstream Motif: 67%

# FadR I-Modulon

Regulated by: FadR or lclR  
 Biological Function: Fatty acid degradation

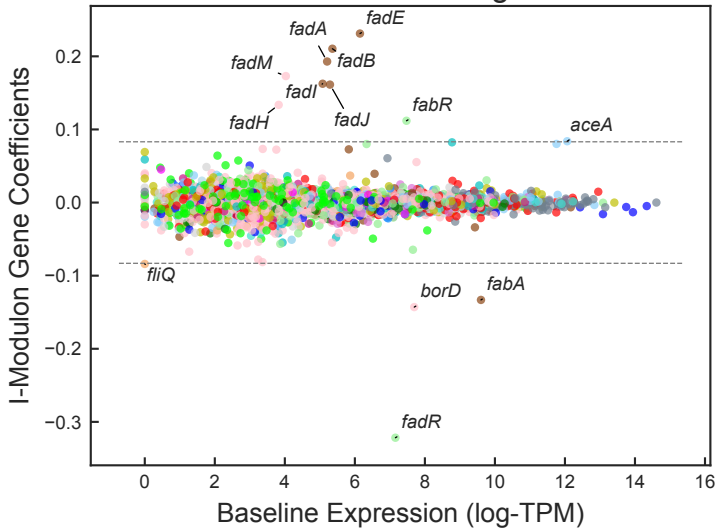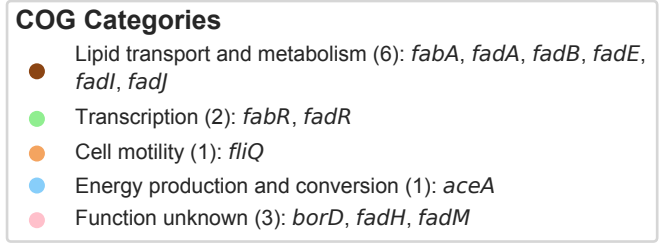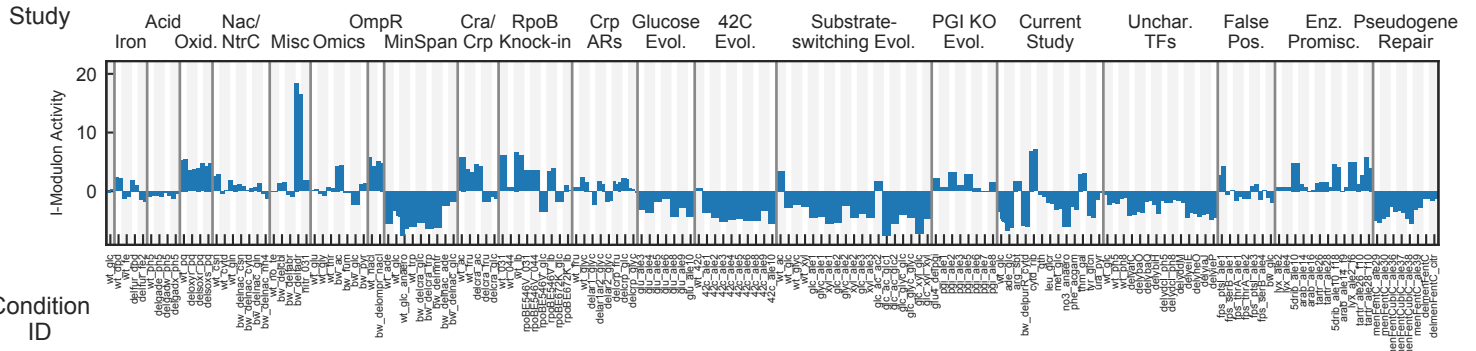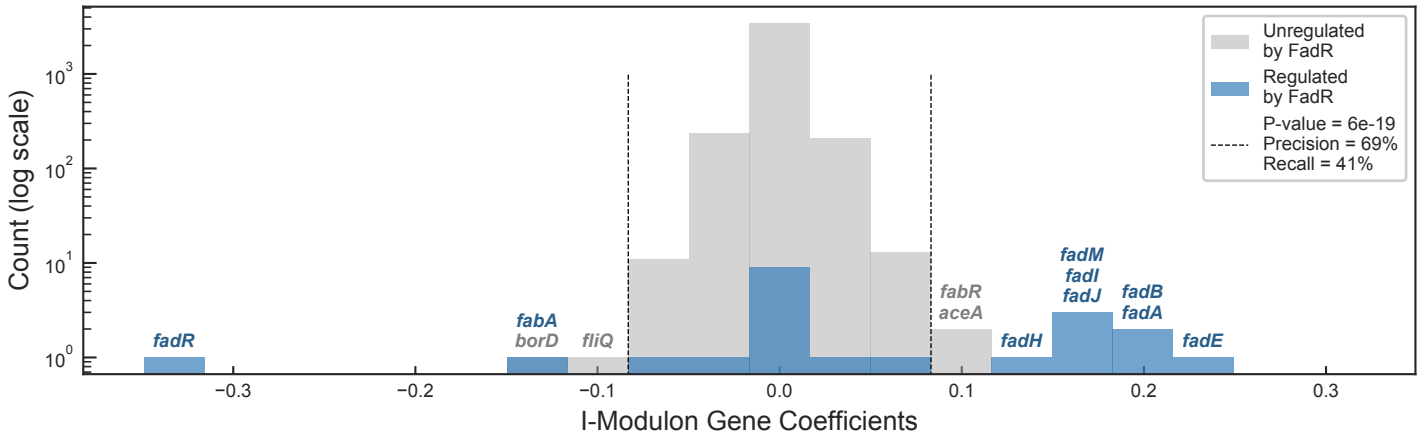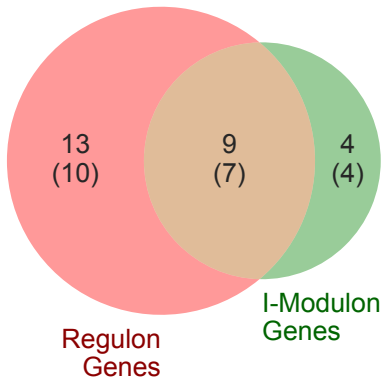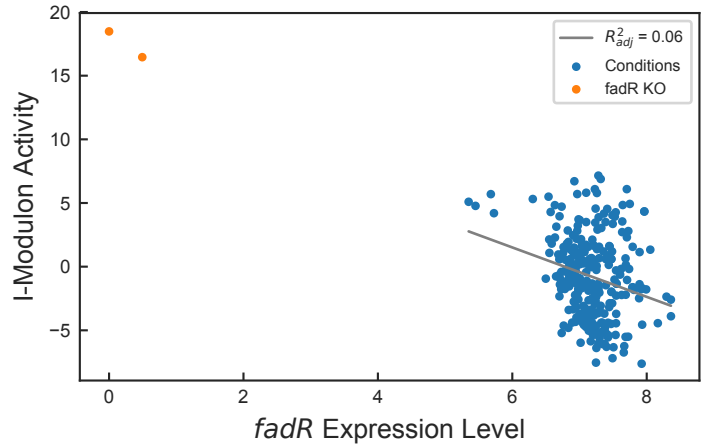

# FecI I-Modulon

Regulated by: FecI

Biological Function: Ferric citrate transport

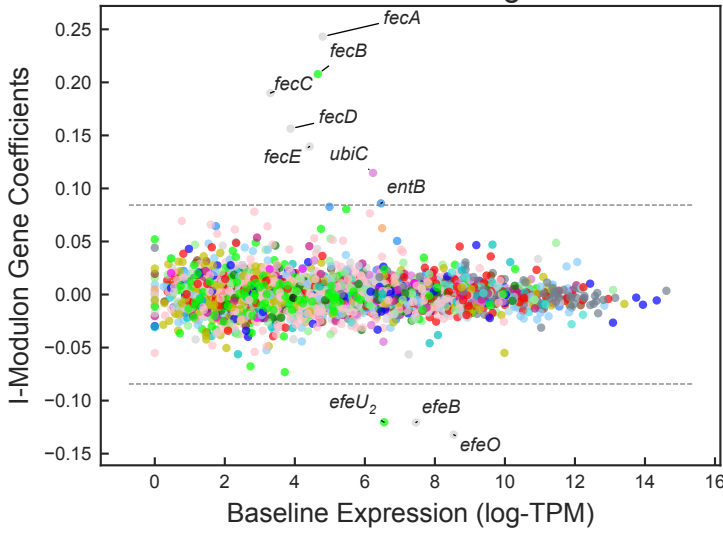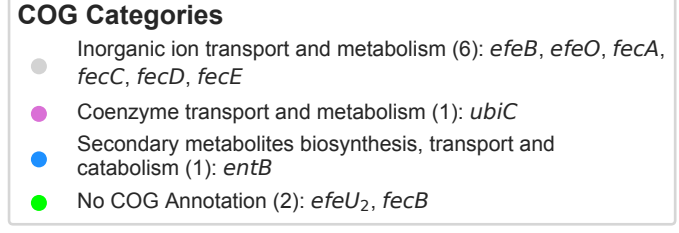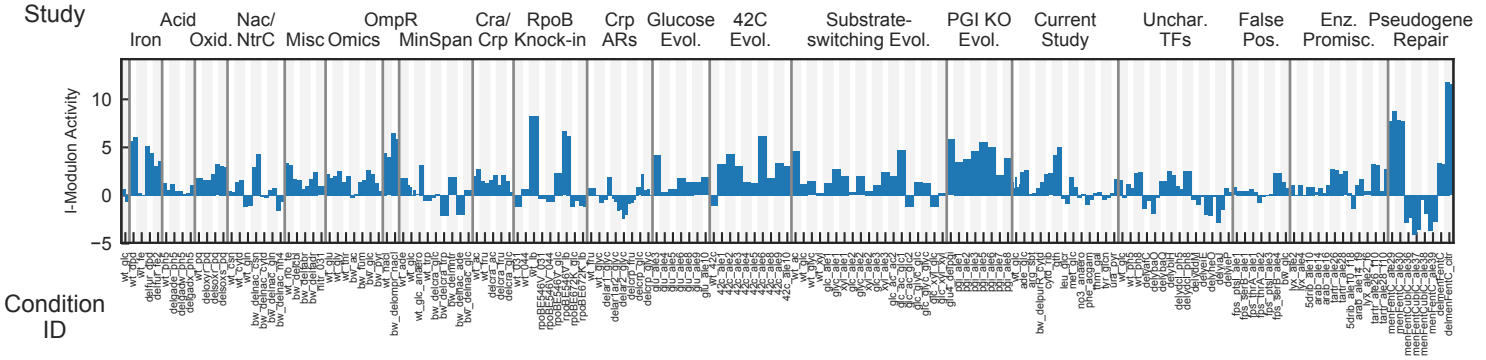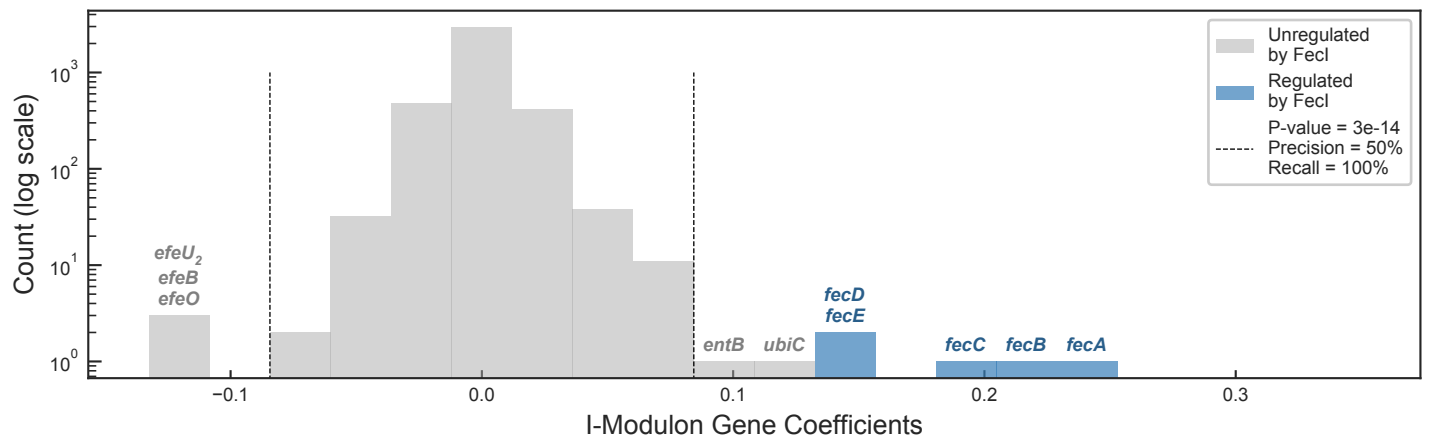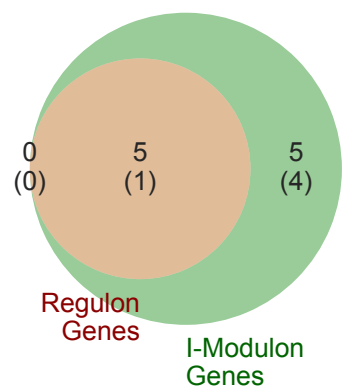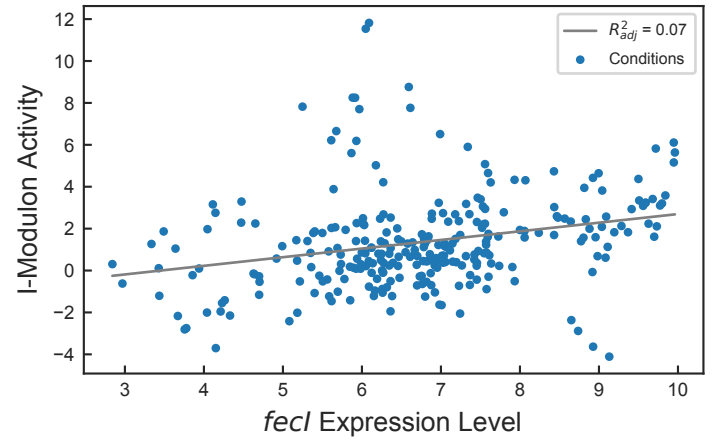

# FlhDC I-Modulon

Regulated by: FlhDC

Biological Function: Flagella assembly

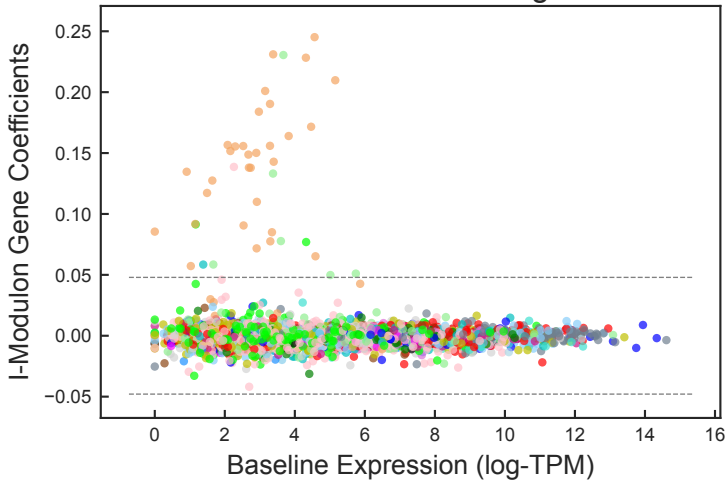

## COG Categories

- Cell motility (31): *flgA, flgB, flgC, flgD, flgE, flgF, flgG, flgH, flgI, flgJ, flgK, flgL, flhA, flhB, flhE, flhI, flhJ, flhK, flhL, flhM, flhN, flhO, flhP, flhQ, flhR, flhS, flj, flk, flL, flM, flN, flO, flP, flQ, flR, flS*
- Transcription (6): *flgM, flhC, flhD, flhA, flhT, flhZ*
- Signal transduction mechanisms (1): *yhjH*
- No COG Annotation (2): *flgN, ymdA*
- Function unknown (1): *yecR*

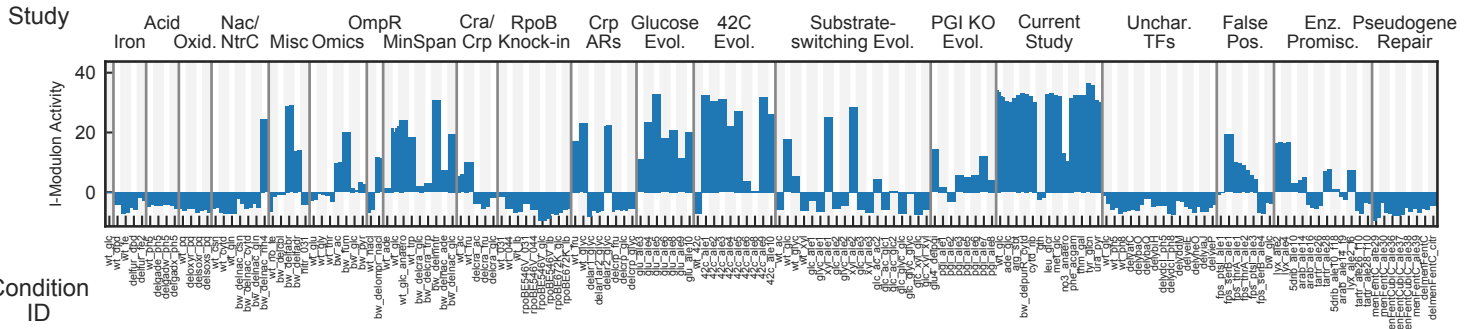

Condition ID

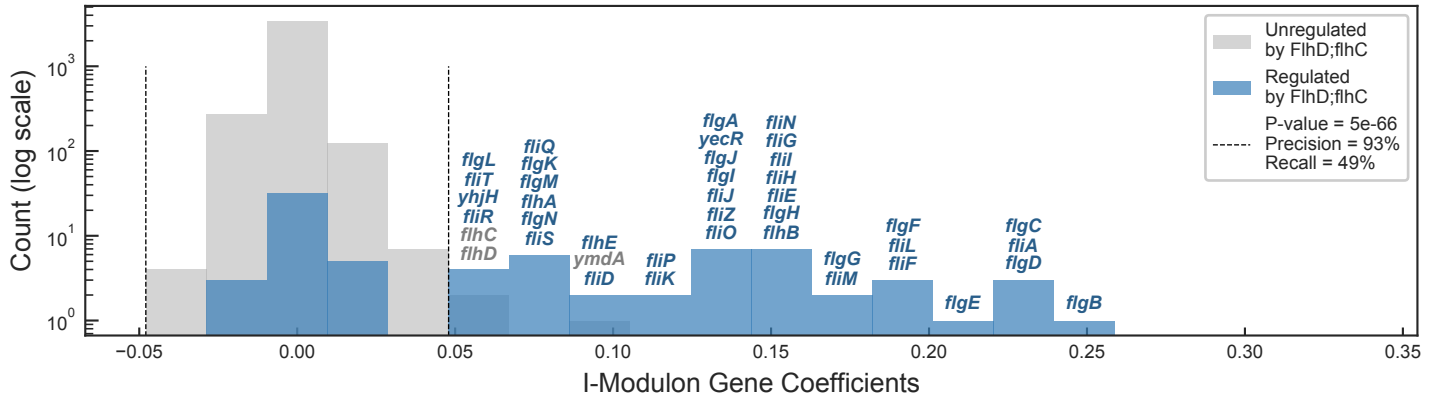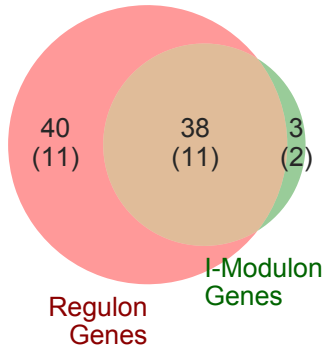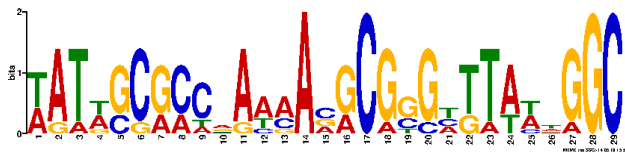

Motif E-value: 7.40e-07  
Operons with Upstream Motif: 54%

# FliA I-Modulon

Regulated by: FliA

Biological Function: Chemotaxis

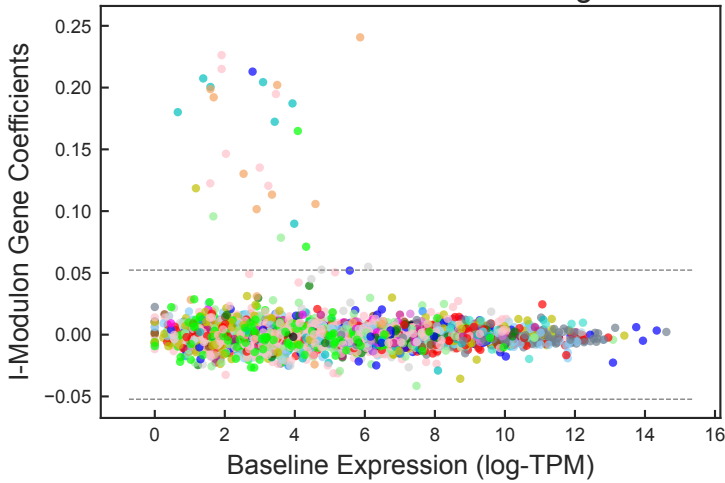

## COG Categories

- Cell motility (8): *cheW, flgK, flgL, flhC, flhD, flhS, motA, motB*
- Signal transduction mechanisms (7): *aer, cheA, cheB, cheR, cheY, cheZ, yhjH*
- Inorganic ion transport and metabolism (2): *modA, modB*
- Transcription (2): *flgM, flhT*
- Carbohydrate transport and metabolism (1): *uhpT*
- Cell wall/membrane/envelope biogenesis (1): *ycgR*
- Function unknown (7): *tap, tar, trg, tsr, ves, yjcZ, ynjH*
- No COG Annotation (2): *flgN, flxA*

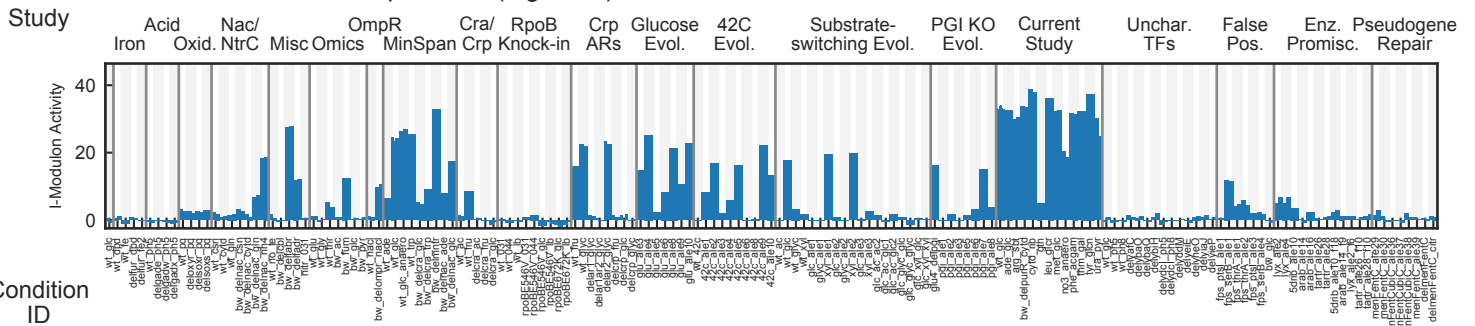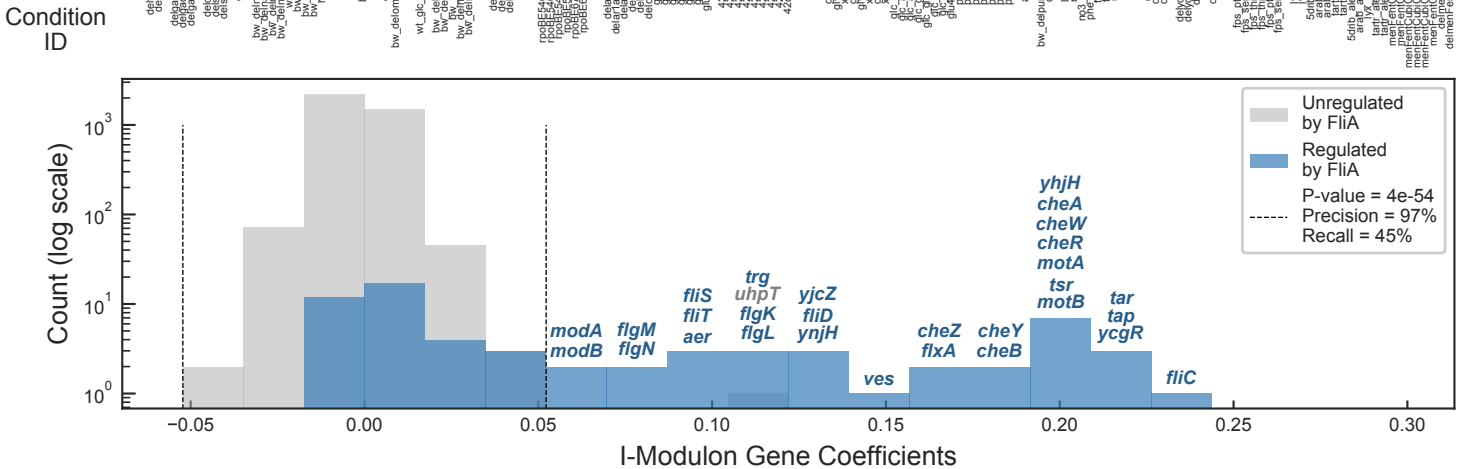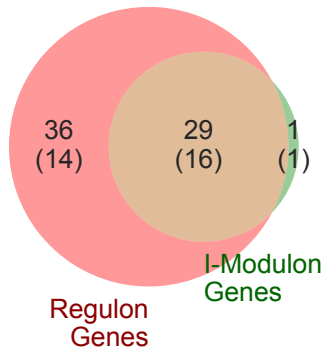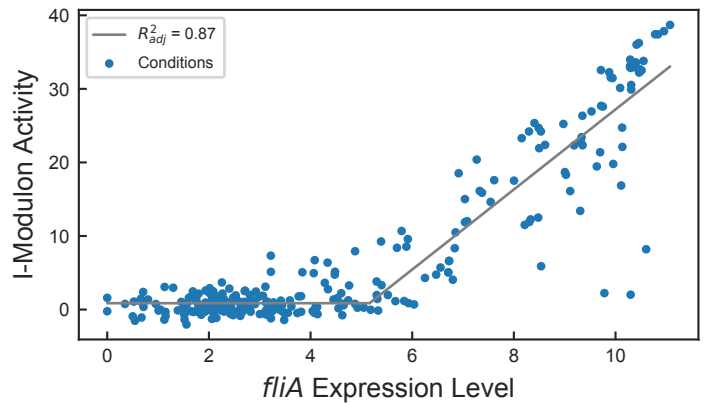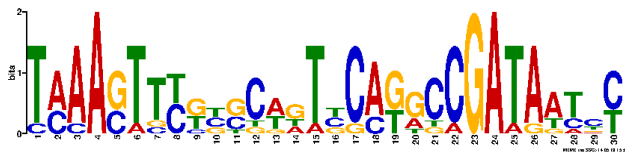

Motif E-value: 2.00e-08  
Operons with Upstream Motif: 47%

# Fnr I-Modulon

Regulated by: Fnr

Biological Function: Anaerobic response

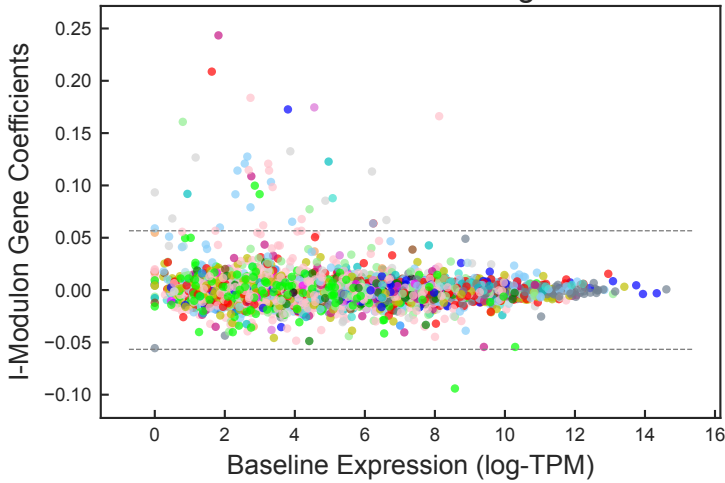

## COG Categories

- Energy production and conversion (10): *dcuC*, *dmsA*, *fdnG*, *frdA*, *hybO*, *napF*, *narG*, *nirB*, *nirD*, *ynfE*
- Inorganic ion transport and metabolism (7): *feoA*, *feoB*, *focA*, *napD*, *narK*, *nikB*, *ynjE*
- Amino acid transport and metabolism (2): *aspA*, *nika*
- Posttranslational modification, protein turnover, chaperones (2): *yhbU*, *yhbV*
- Signal transduction mechanisms (2): *bssR*, *yeal*
- Other (17): *hypB*, *ttdR*, *ompW*, *ynfK*, *nrdD*, *abrB*, *grcA*, *ycbJ*, *ydfZ*, *ydjX*, *ydjY*, *yecH*, *yfcC*, *yhcC*, *iscR*, *yjil*, *yoeA<sub>1</sub>*

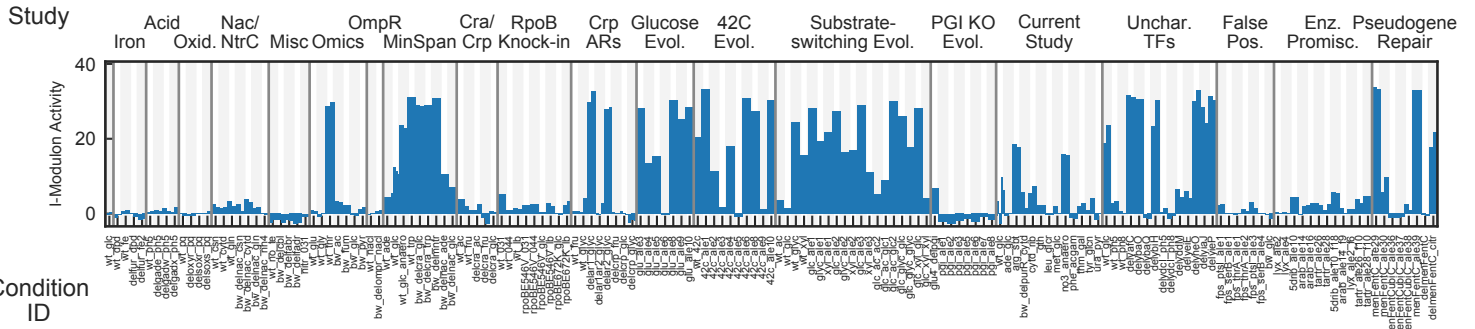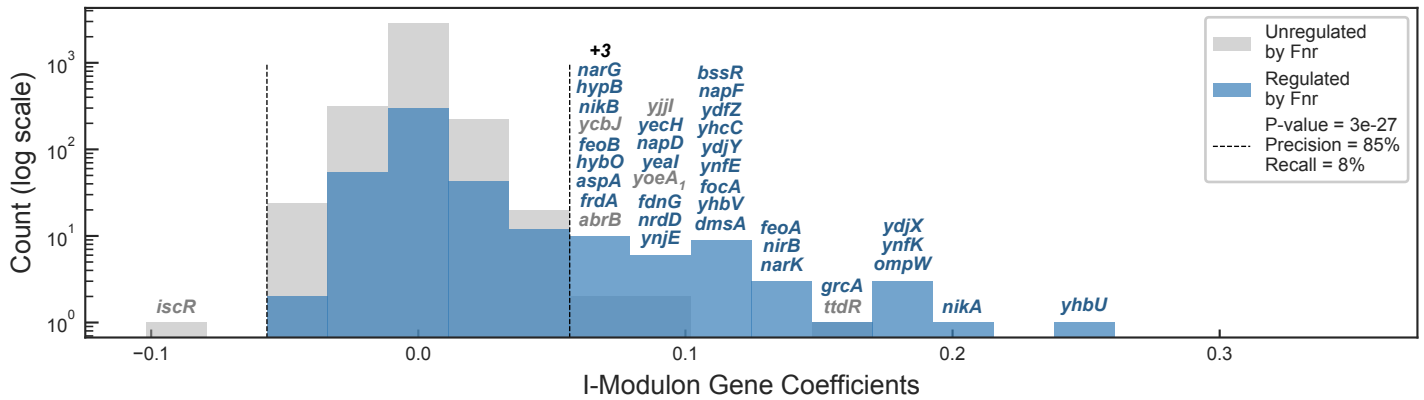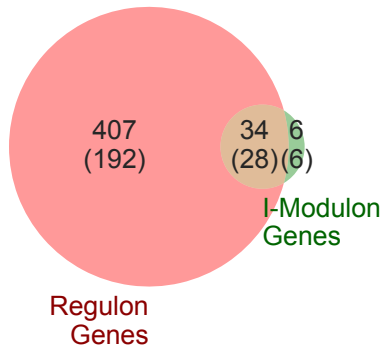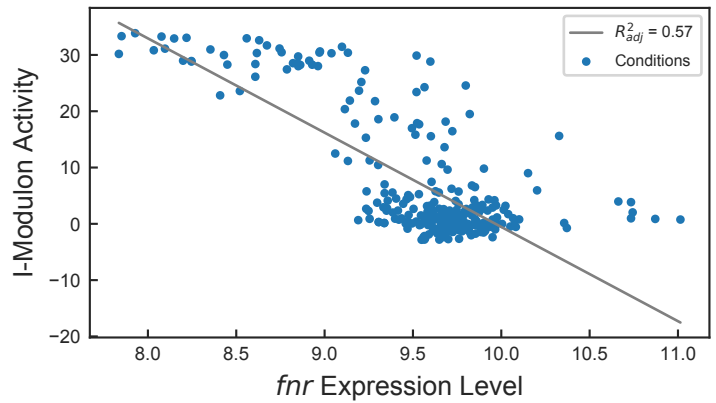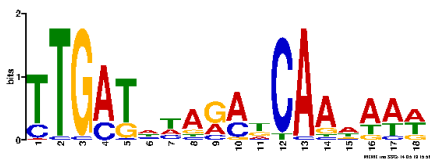

Motif E-value: 4.60e-12  
Operons with Upstream Motif: 82%

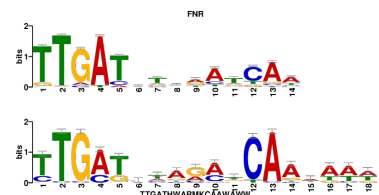

Motif similar to FNR (E-value: 2.98e-06)



# Fur - 1 I-Modulon

Regulated by: Fur

Biological Function: Iron homeostasis

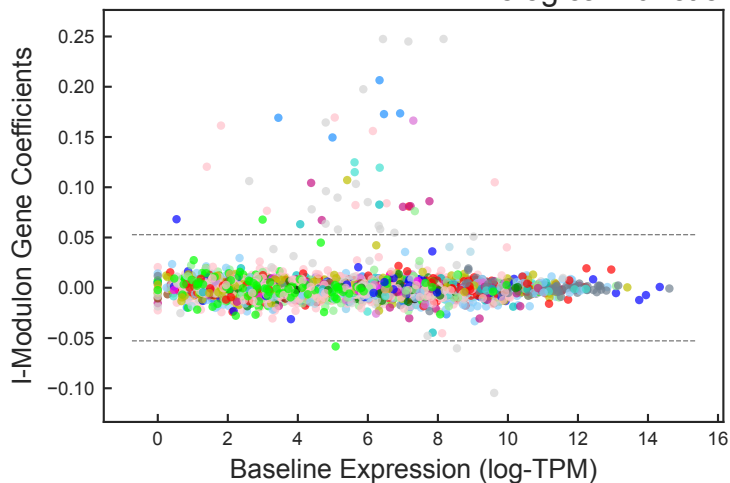

## COG Categories

- Inorganic ion transport and metabolism (18): *bfr, cirA, fecA, fepA, fepB, fepC, fepD, fepG, fes, fhuB, fhuC, fhuD, fhuE, fiu, sodB, yddB, ydiE, yqjH*
- Posttranslational modification, protein turnover, chaperones (5): *nrdH, pqqL, sufB, sufC, sufD*
- Secondary metabolites biosynthesis, transport and catabolism (5): *entB, entD, entE, entF, entH*
- Nucleotide transport and metabolism (3): *nrdE, nrdF, nrdI*
- Signal transduction mechanisms (2): *fecR, ybil*
- Other (15): *sufS, ents, fepE, entC, fecl, entA, sufA, sufE, ybdZ, ybiX, yddA, yjjZ, yncE, yoeA<sub>1</sub>, yoeG<sub>1</sub>*

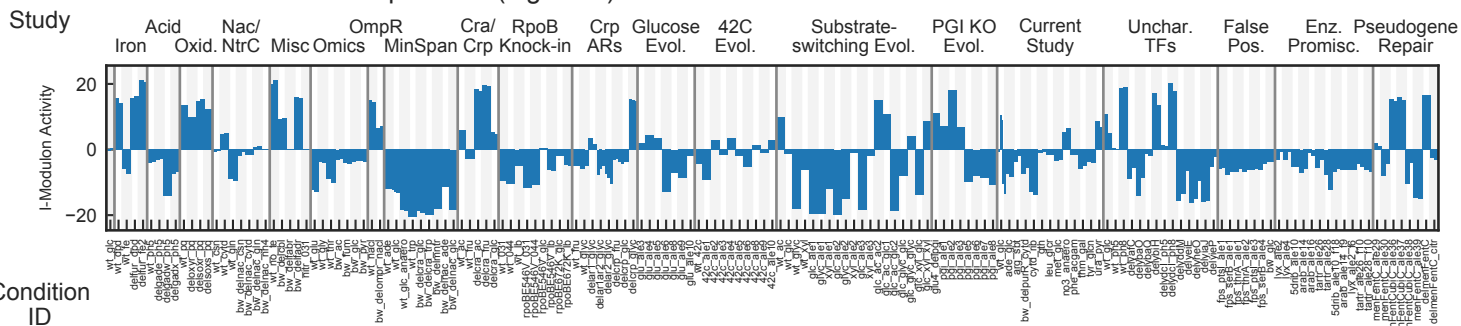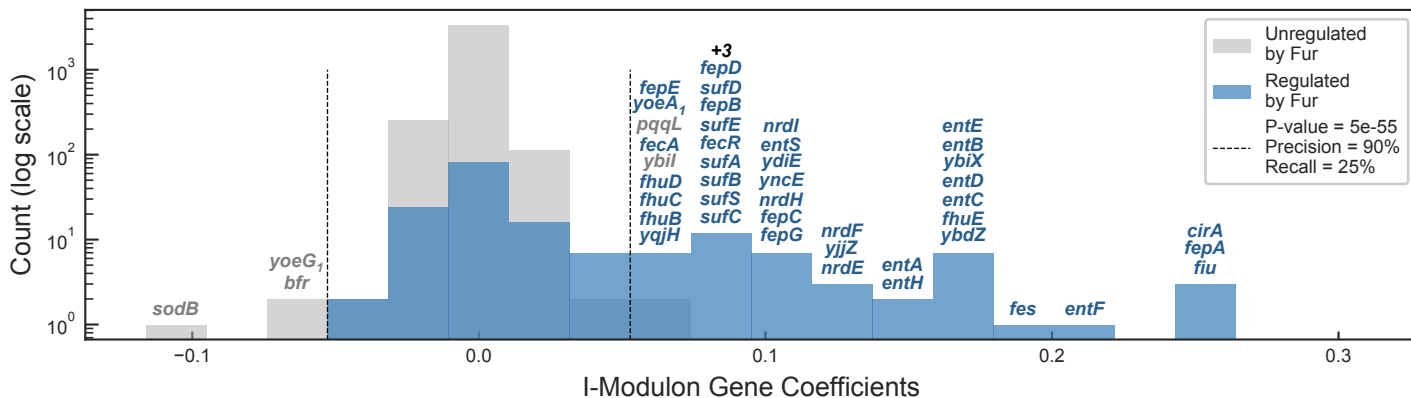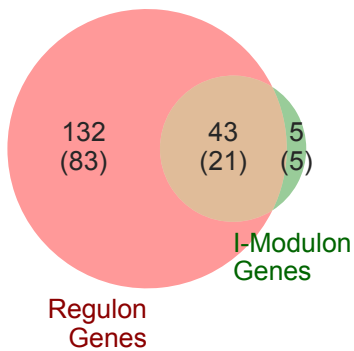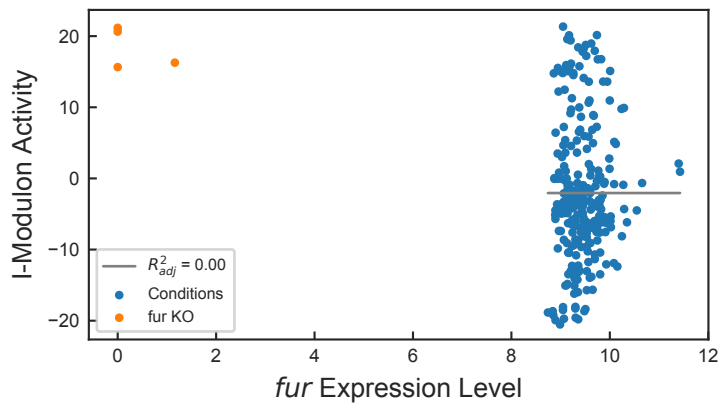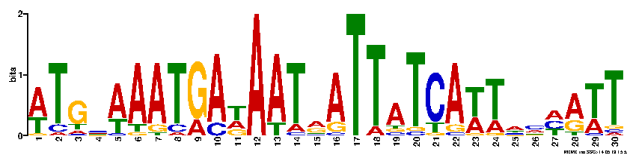

Motif E-value: 9.40e-36  
Operons with Upstream Motif: 69%

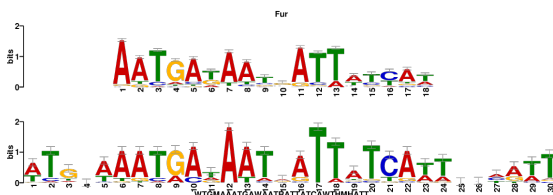

Motif similar to Fur (E-value: 1.75e-10)

# Fur – 2 I-Modulon

Regulated by: Fur

Biological Function: Iron homeostasis

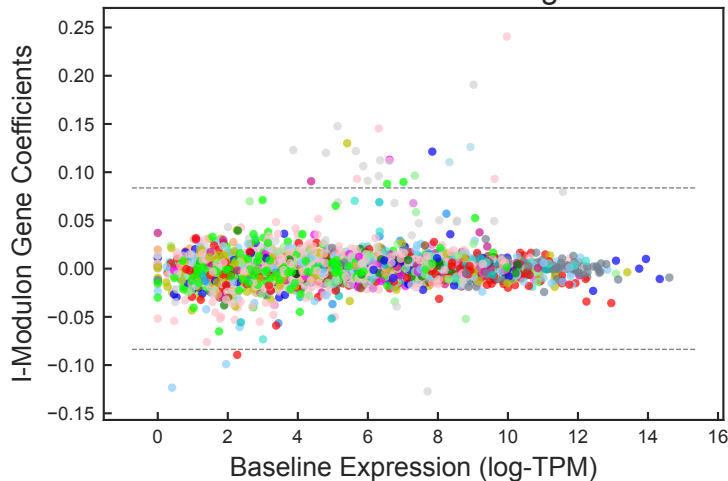

## COG Categories

- Inorganic ion transport and metabolism (11): *feoA*, *feoB*, *fepB*, *fepC*, *fepD*, *fepG*, *fes*, *fhuA*, *fhuC*, *fhuD*, *ftnA*
- Energy production and conversion (2): *ydhV*, *ydhY*
- Intracellular trafficking, secretion, and vesicular transport (2): *exbB*, *exbD*
- Amino acid transport and metabolism (1): *preT*
- Carbohydrate transport and metabolism (1): *entS*
- Cell wall/membrane/envelope biogenesis (1): *tonB*
- Other (9): *yojI*, *nrdH*, *fecl*, *bfd*, *fhuF*, *ybaN*, *yncE*, *efeU<sub>2</sub>*, *gadW*

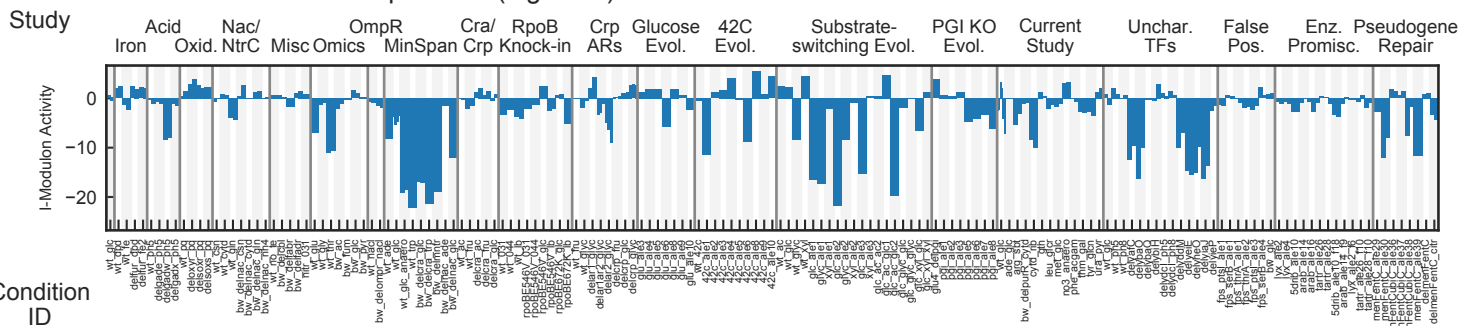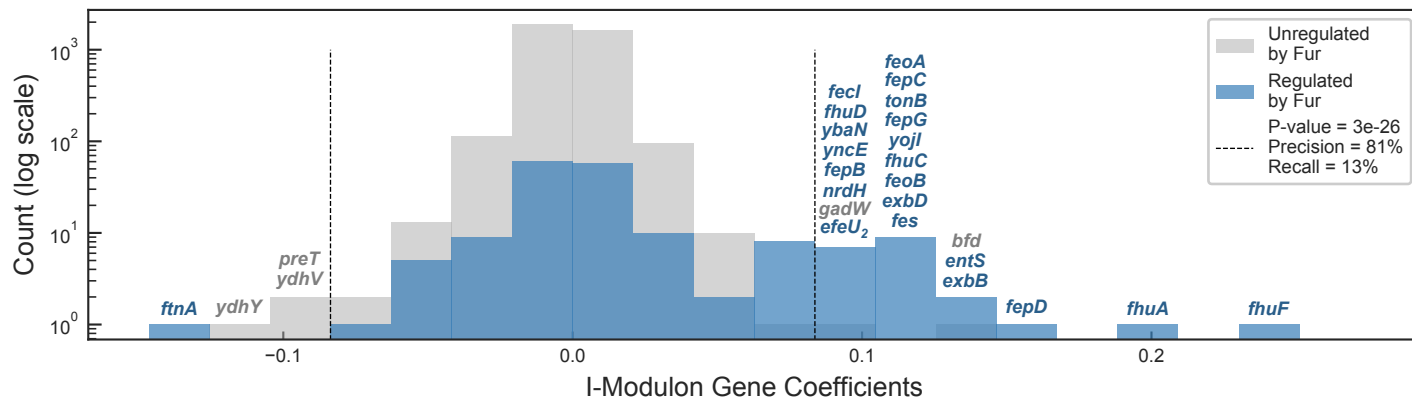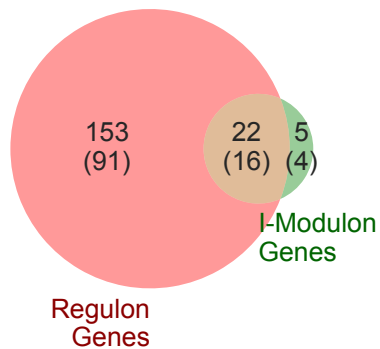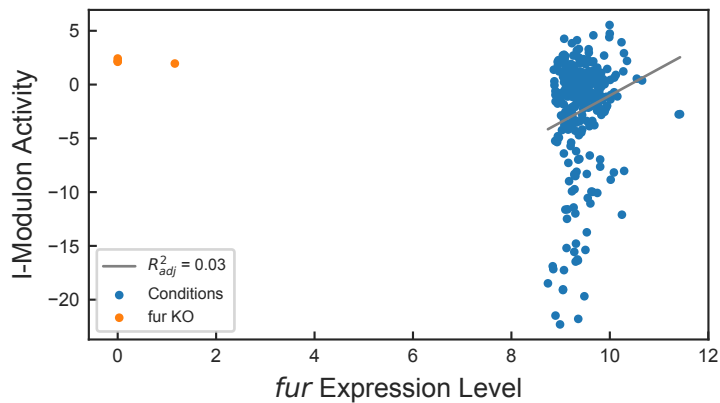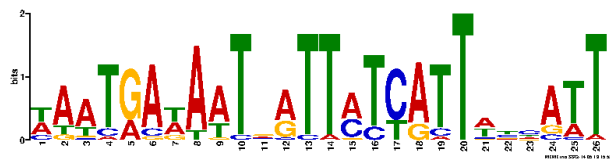

Motif E-value: 3.40e-32  
Operons with Upstream Motif: 90%

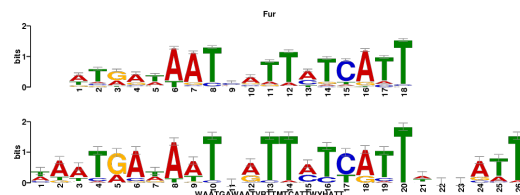

Motif similar to Fur (E-value: 2.42e-11)

# GadEWX I-Modulon

Regulated by: GadE and GadW and GadX

Biological Function: Acid stress response

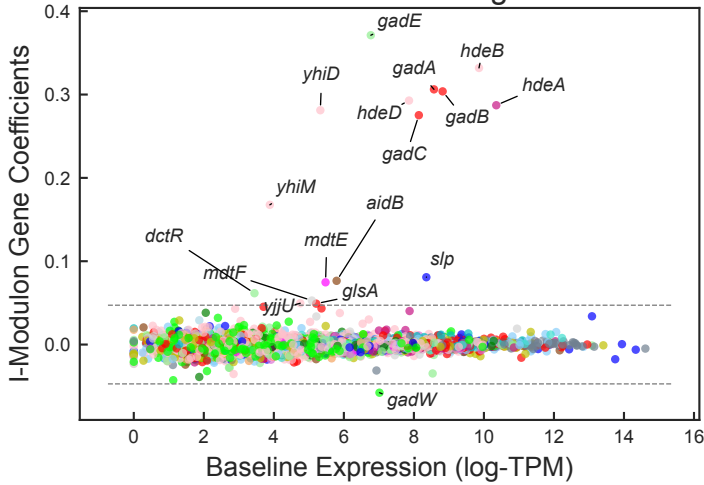

## COG Categories

- Amino acid transport and metabolism (4): *gadA*, *gadB*, *gadC*, *glsA*
- Transcription (2): *dctR*, *gadE*
- Cell wall/membrane/envelope biogenesis (1): *slp*
- Defense mechanisms (1): *mdtE*
- Inorganic ion transport and metabolism (1): *mdtF*
- Lipid transport and metabolism (1): *aidB*
- Other (7): *hdeA*, *hdeB*, *hdeD*, *yhiD*, *yhiM*, *yjiU*, *gadW*

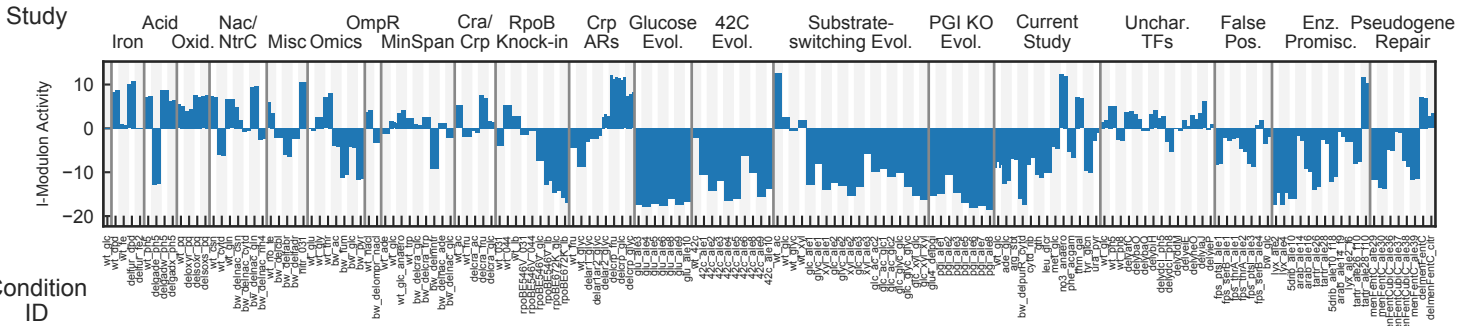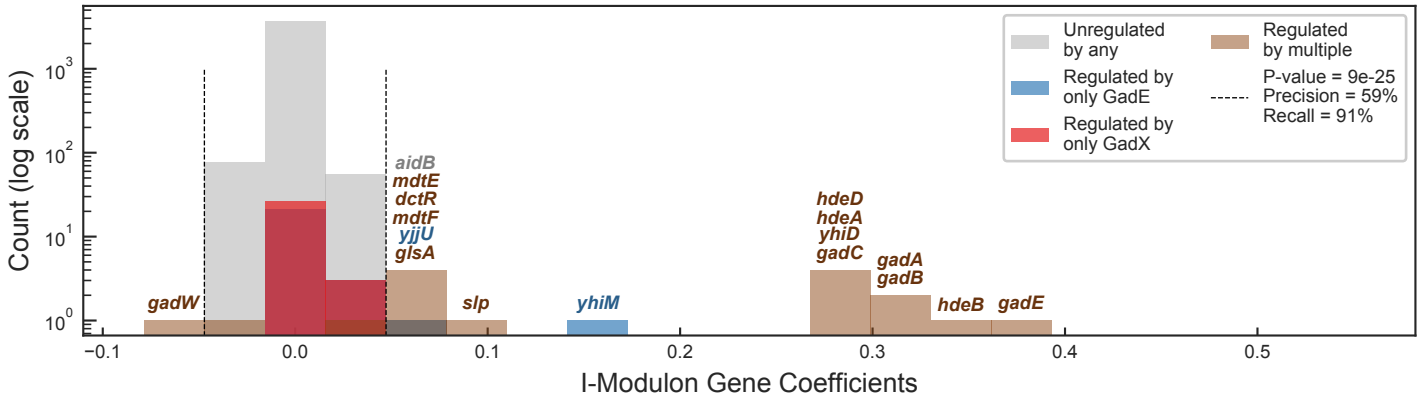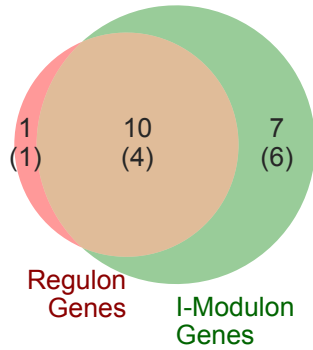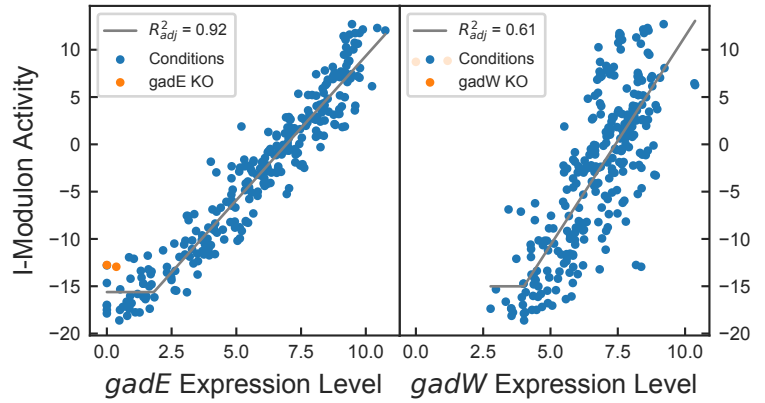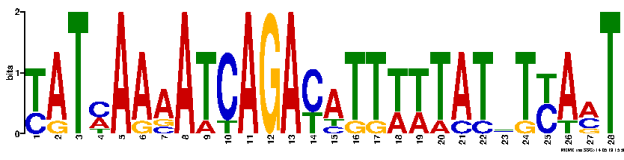

Motif E-value: 8.00e-04  
Operons with Upstream Motif: 60%

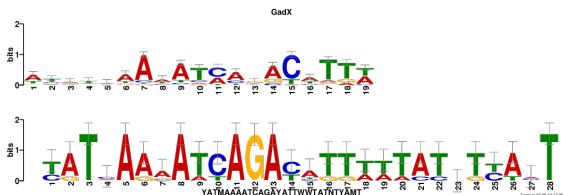

Motif similar to GadX (E-value: 5.32e-04)

# GadWX I-Modulon

Regulated by: GadW and GadX  
 Biological Function: Acid stress response

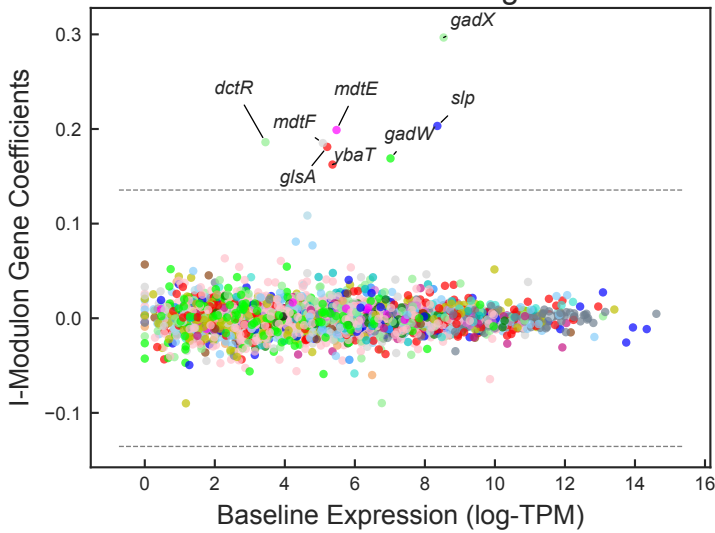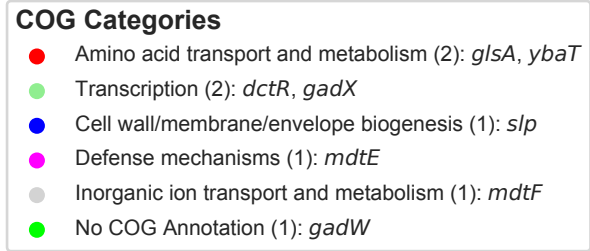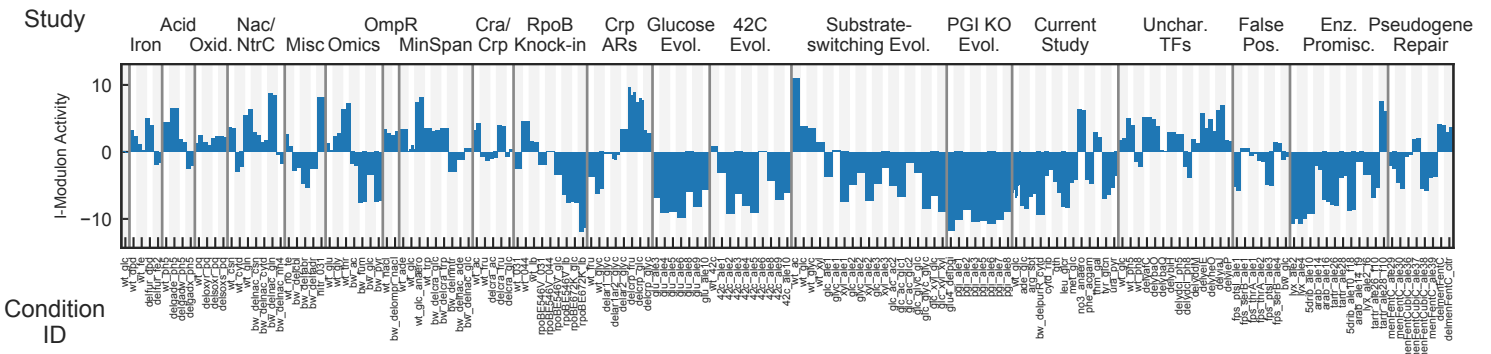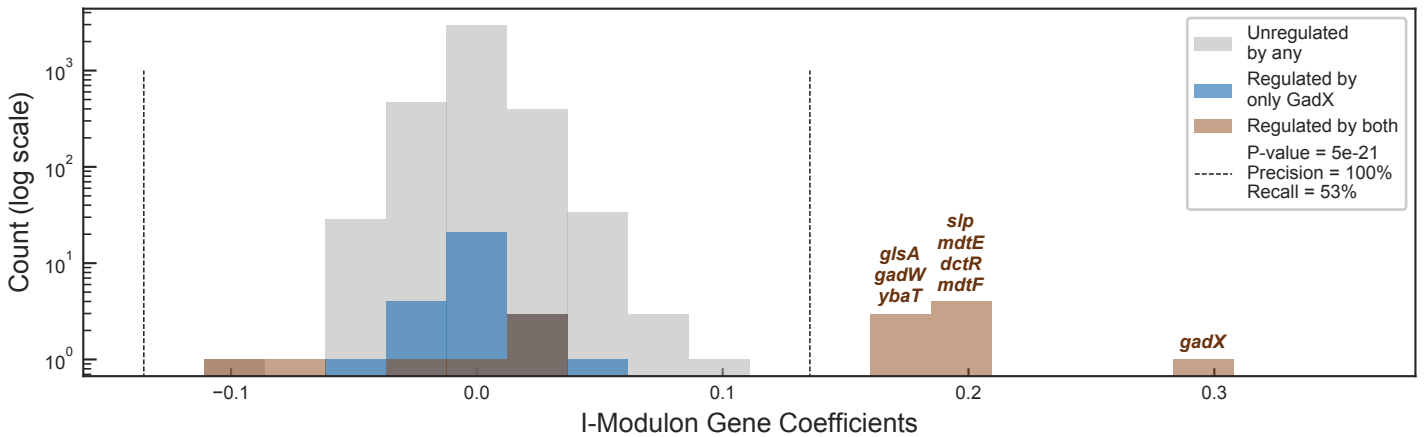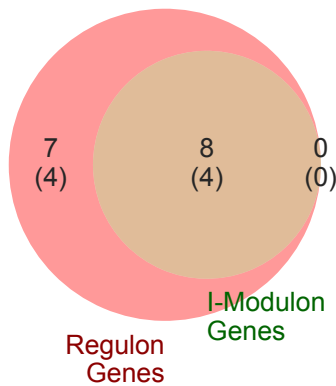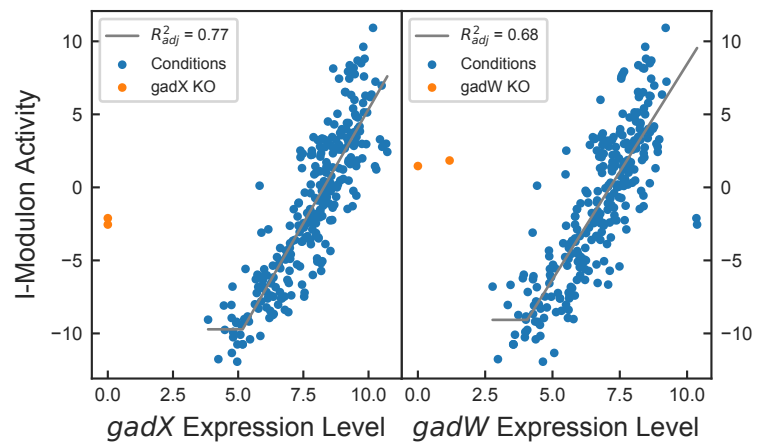

# GcvA I-Modulon

Regulated by: GcvA

Biological Function: Glycine cleavage system

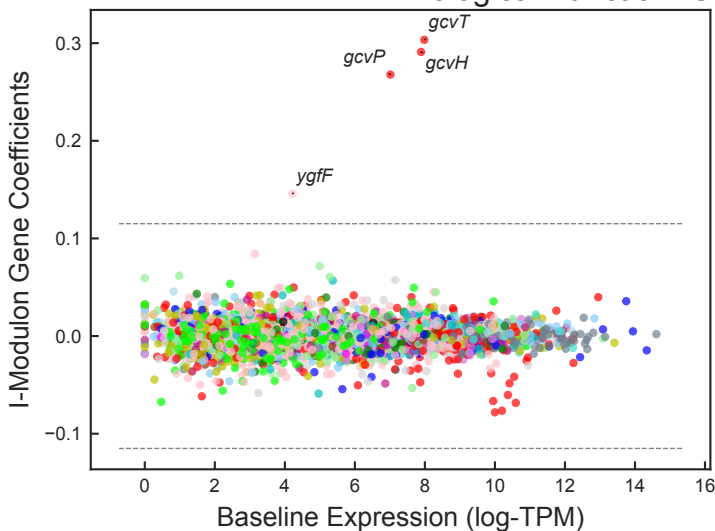

## COG Categories

- Amino acid transport and metabolism (3): *gcvH*, *gcvP*, *gcvT*
- Function unknown (1): *ygfF*

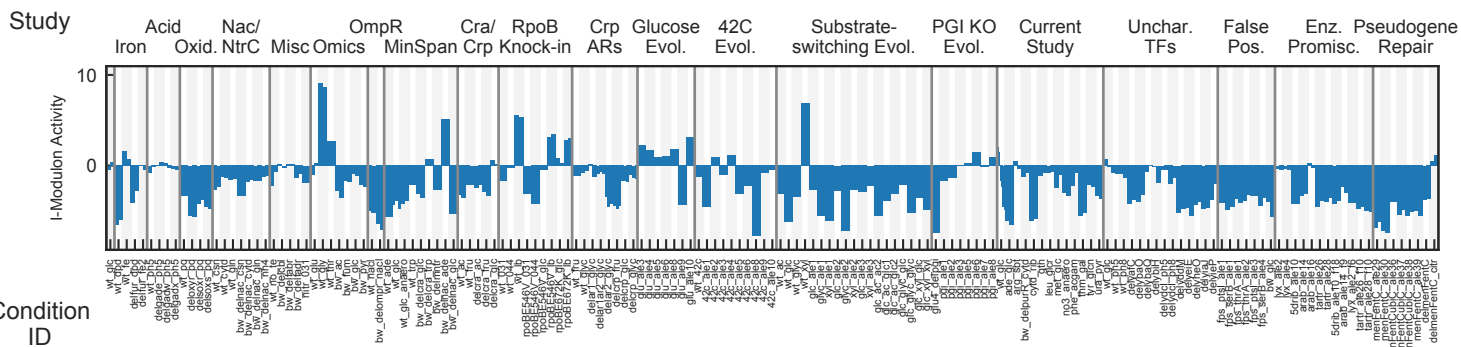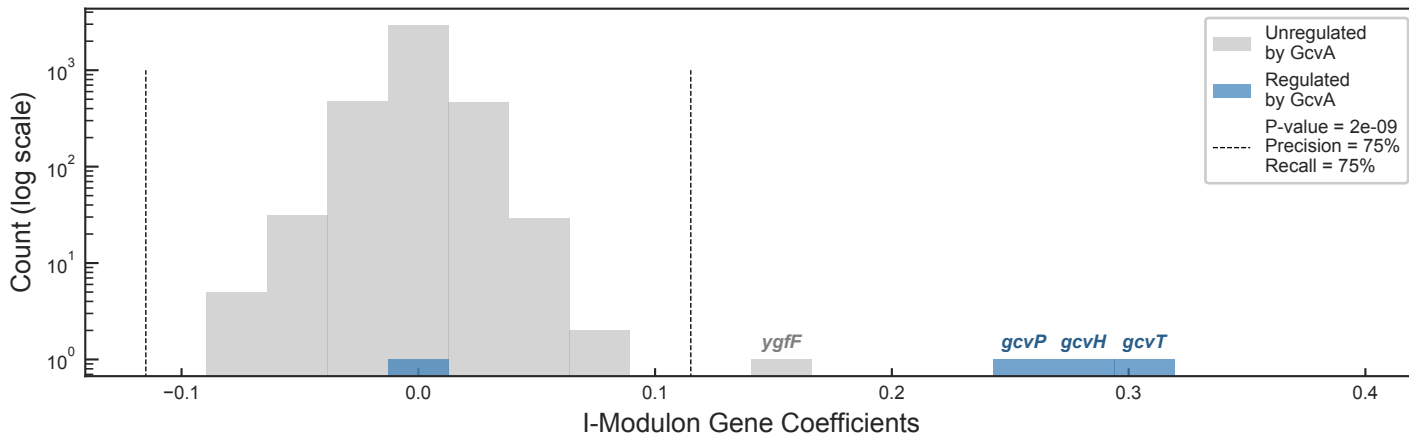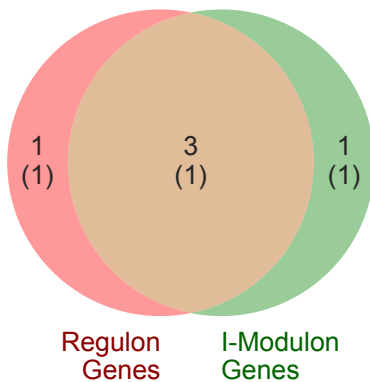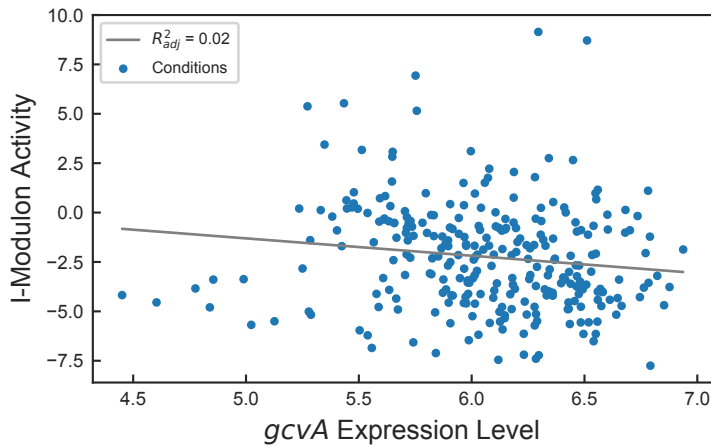

# GlcC I-Modulon

Regulated by: GlcC

Biological Function: Glycolate catabolism

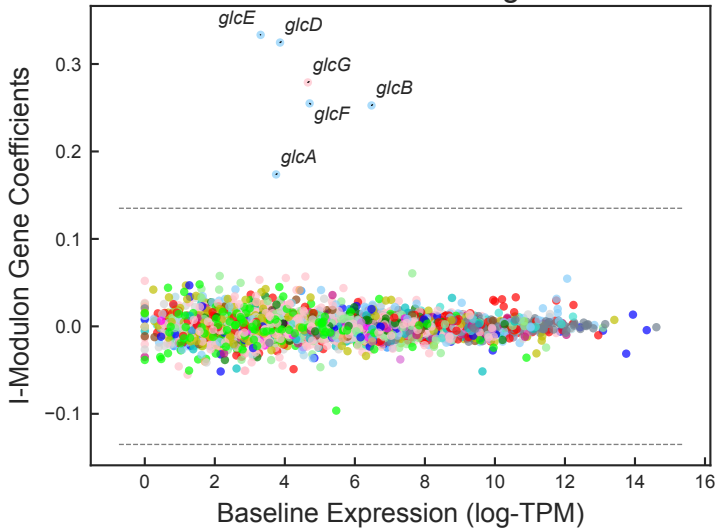

## COG Categories

- Energy production and conversion (5): *glcA*, *glcB*, *glcD*, *glcE*, *glcF*
- Function unknown (1): *glcG*

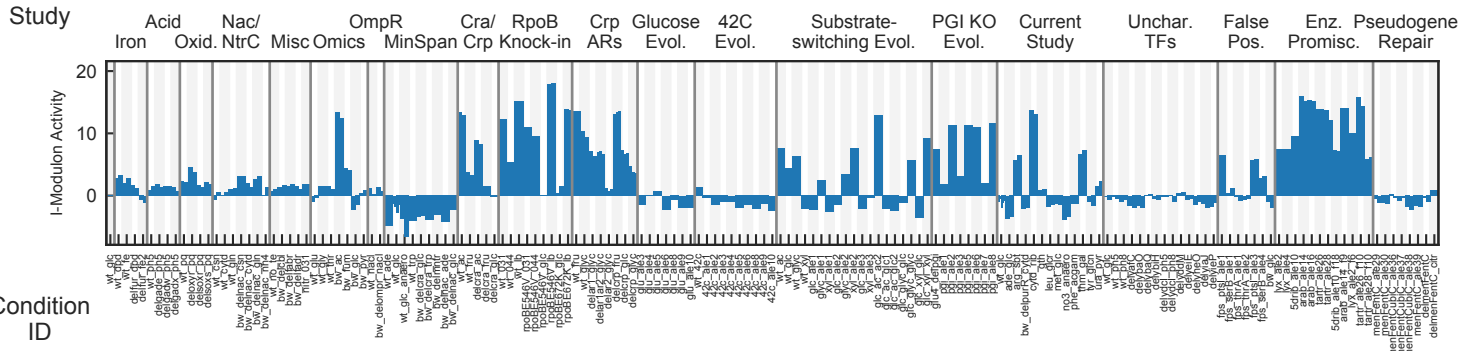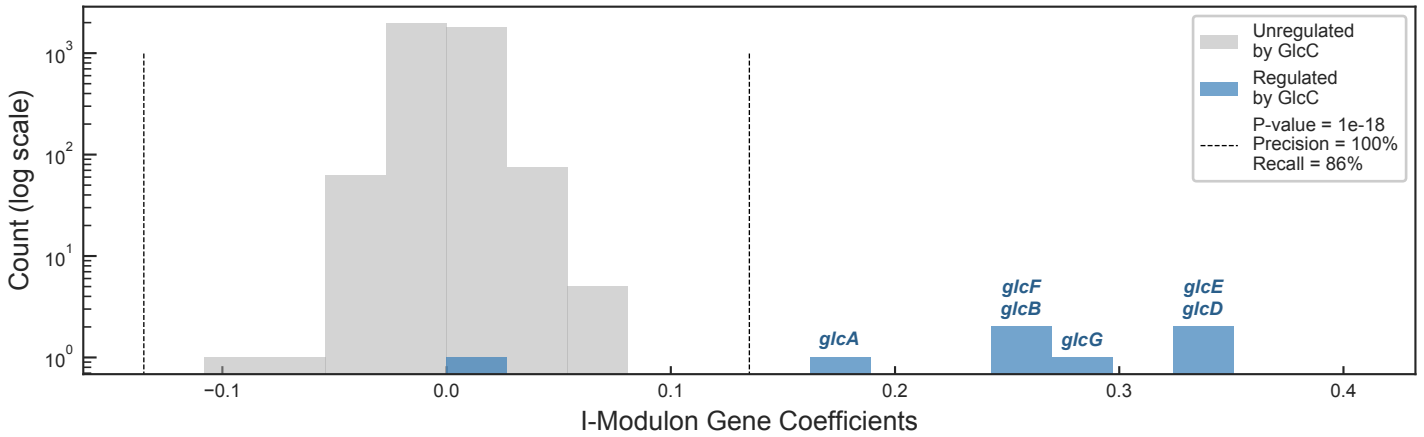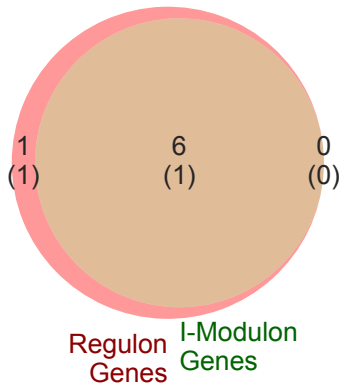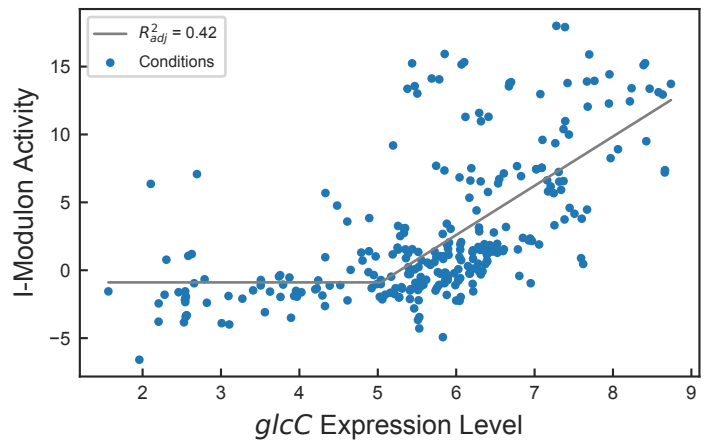

# GlpR I-Modulon

Regulated by: GlpR

Biological Function: Glycerol catabolism

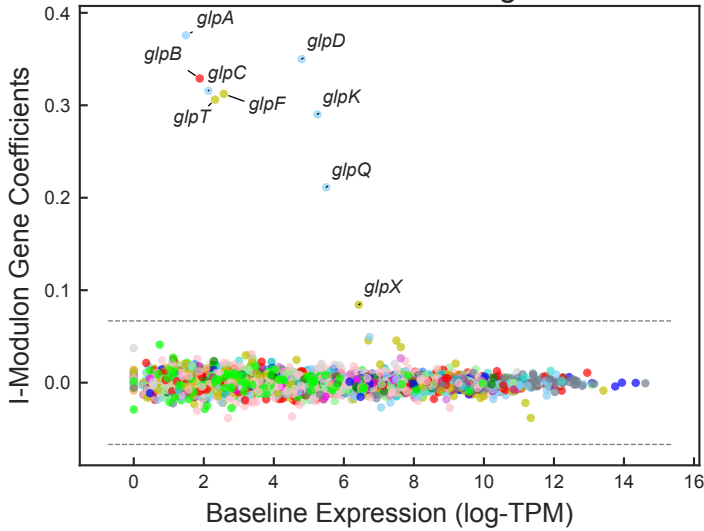

## COG Categories

- Energy production and conversion (5): *glpA*, *glpC*, *glpD*, *glpK*, *glpQ*
- Carbohydrate transport and metabolism (3): *glpF*, *glpT*, *glpX*
- Amino acid transport and metabolism (1): *glpB*

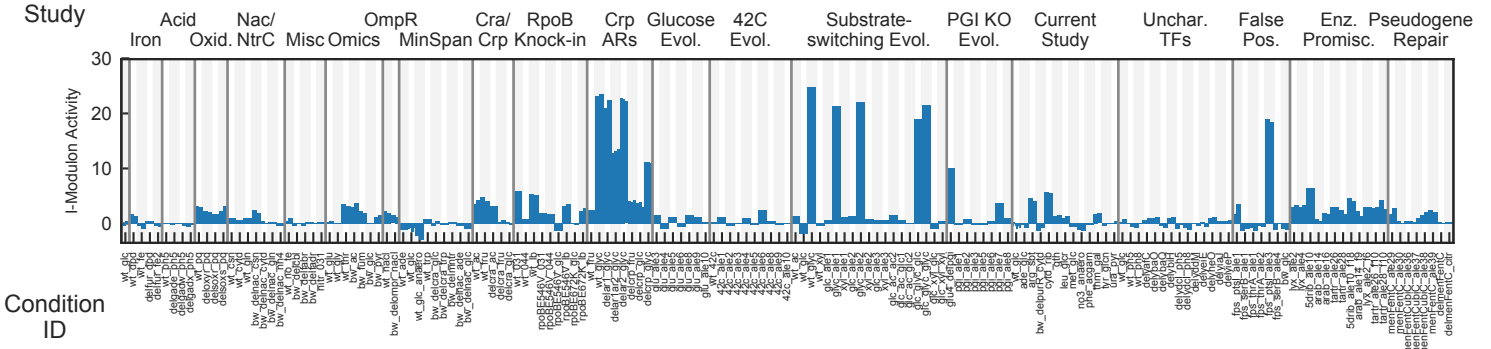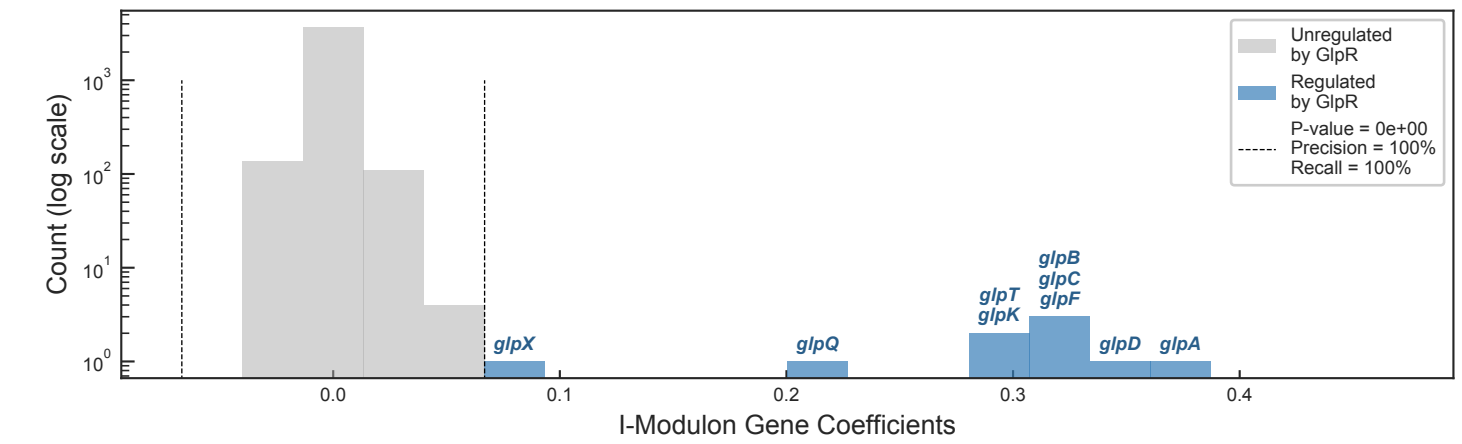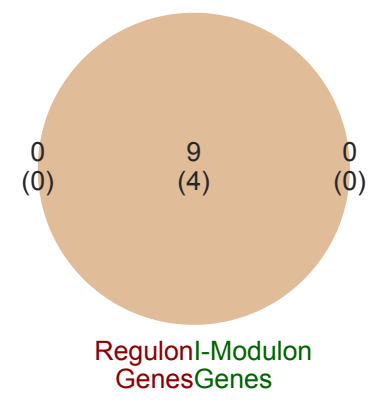

# GntR/TyrR I-Modulon

Regulated by: GntR or TyrR

Biological Function: Gluconate catabolism and tyrosine biosynthesis

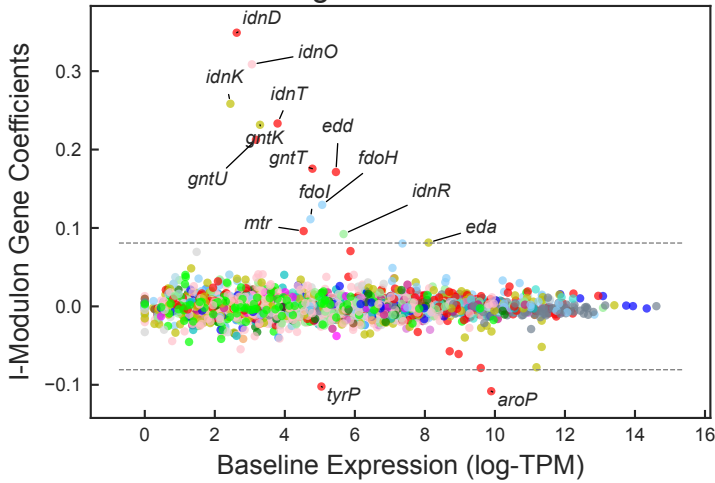

## COG Categories

- Amino acid transport and metabolism (8): *aroP*, *edd*, *gntT*, *gntU*, *idnD*, *idnT*, *mtr*, *tyrP*
- Carbohydrate transport and metabolism (3): *eda*, *gntK*, *idnK*
- Energy production and conversion (2): *fdoH*, *fdoI*
- Transcription (1): *idnR*
- Function unknown (1): *idnO*

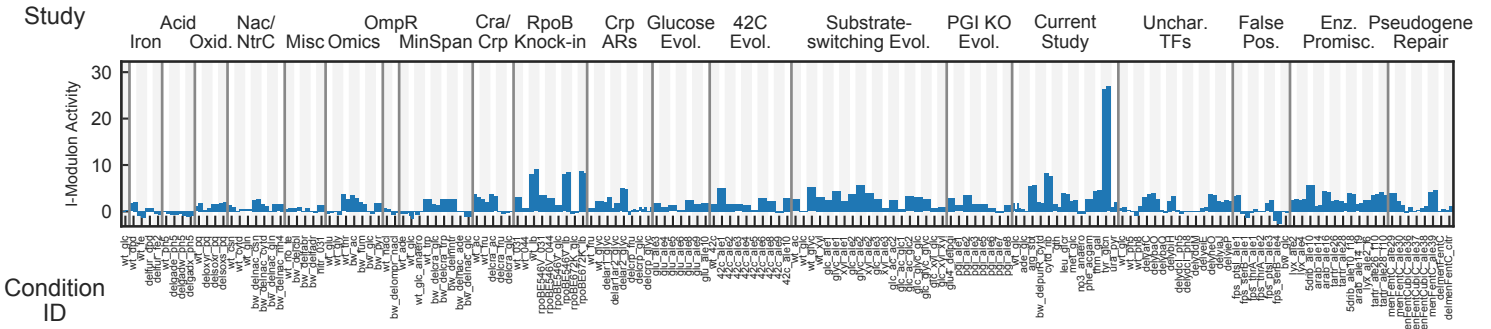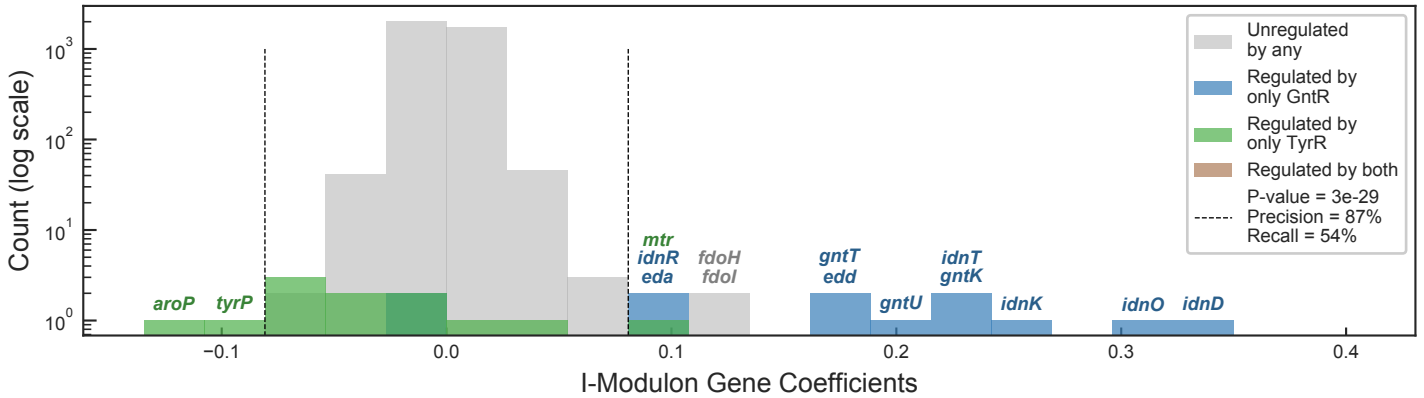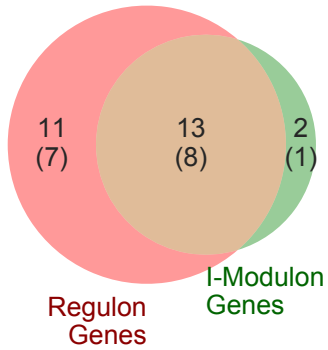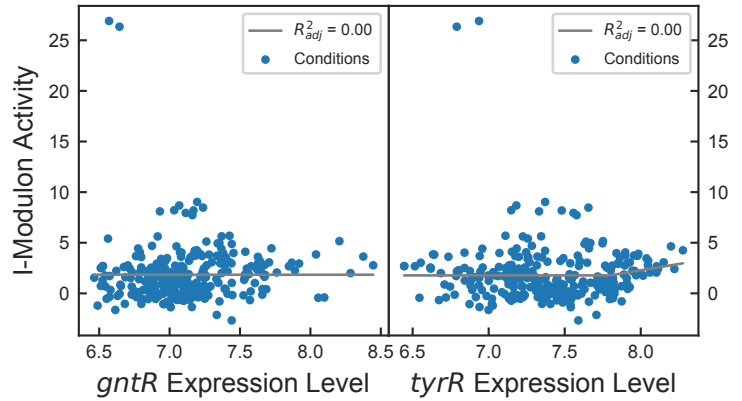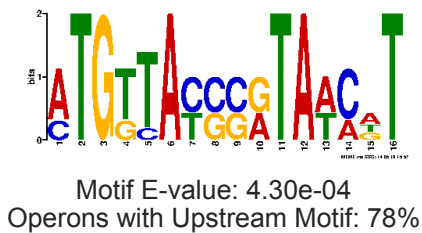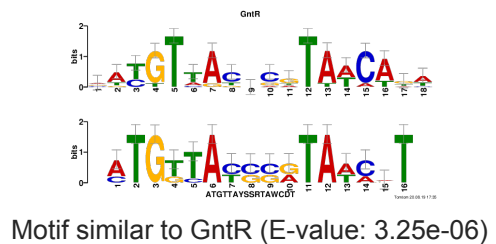



# His - tRNA I-Modulon

Regulated by: His-tRNA attenuation  
 Biological Function: Histidine biosynthesis

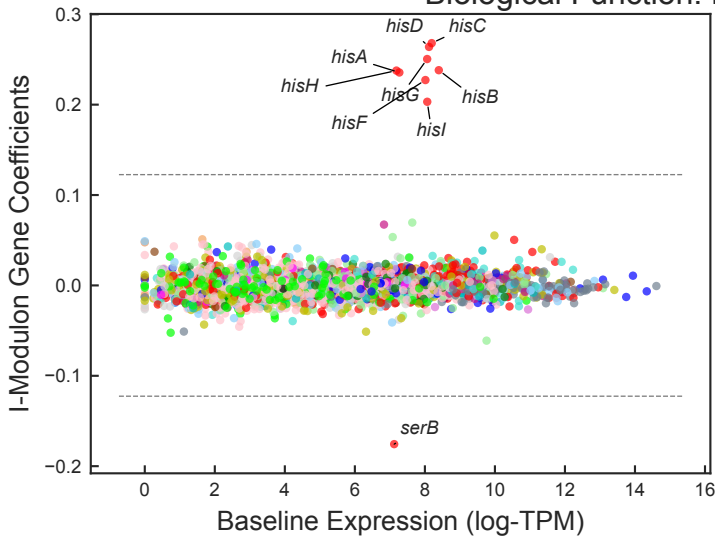

## COG Categories

● Amino acid transport and metabolism (9): *hisA, hisB, hisC, hisD, hisF, hisG, hisH, hisI, serB*

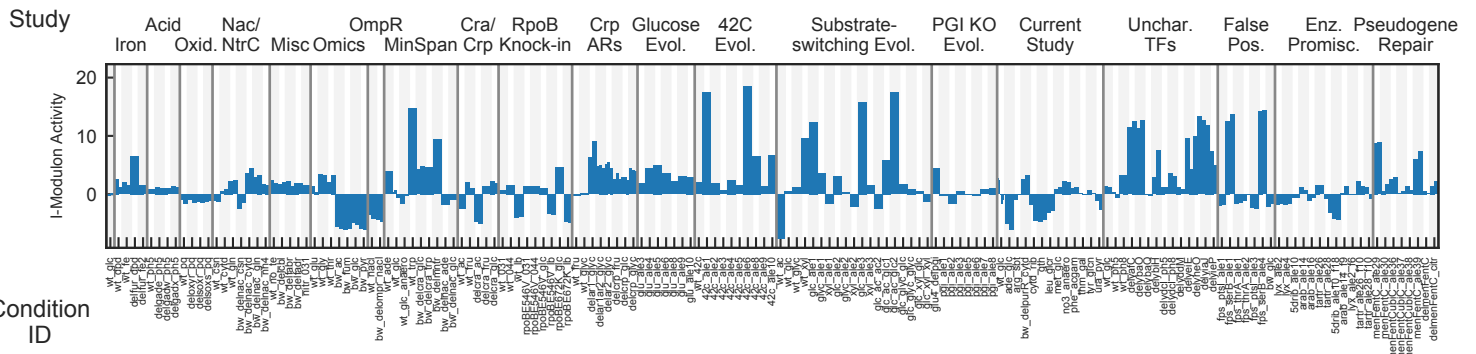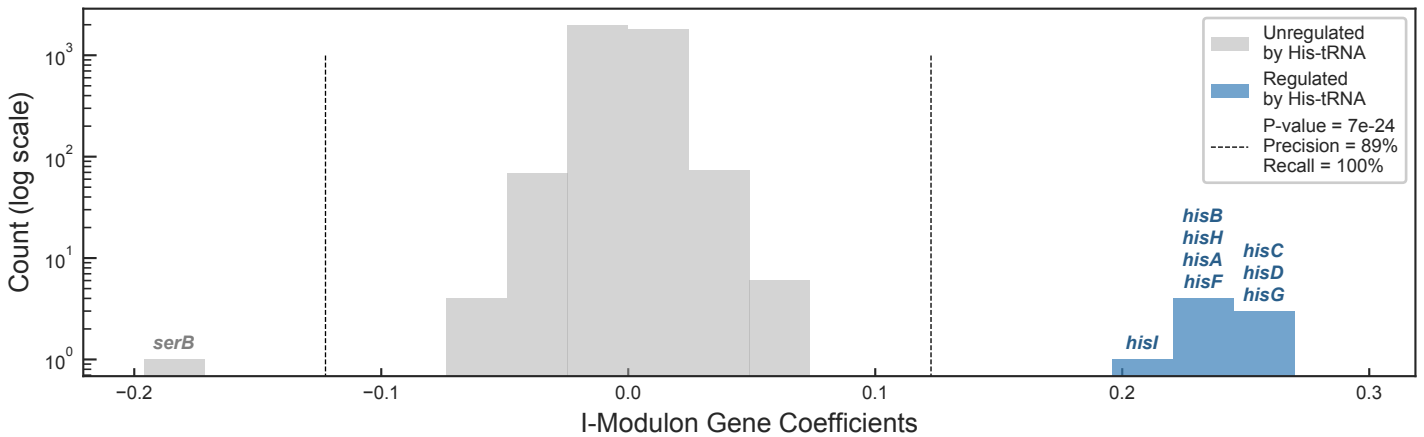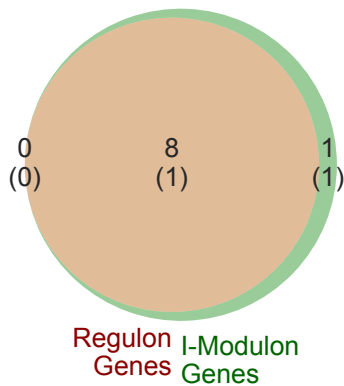

# Leu/Ile I-Modulon

Regulated by: *IlvY* or *leu*-tRNA attenuation or *ile*-tRNA attenuation

Biological Function: Branched-chain amino acid biosynthesis

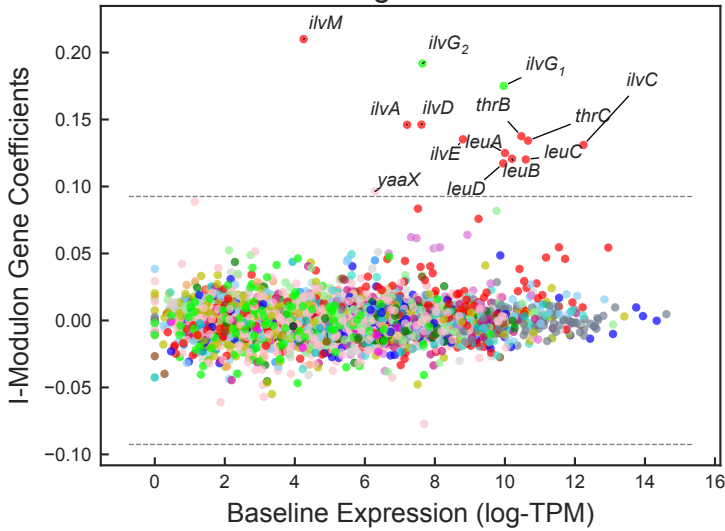

## COG Categories

- Amino acid transport and metabolism (11): *ilvA*, *ilvC*, *ilvD*, *ilvE*, *ilvM*, *leuA*, *leuB*, *leuC*, *leuD*, *thrB*, *thrC*
- No COG Annotation (2): *ilvG1*, *ilvG2*
- Function unknown (1): *yaaX*

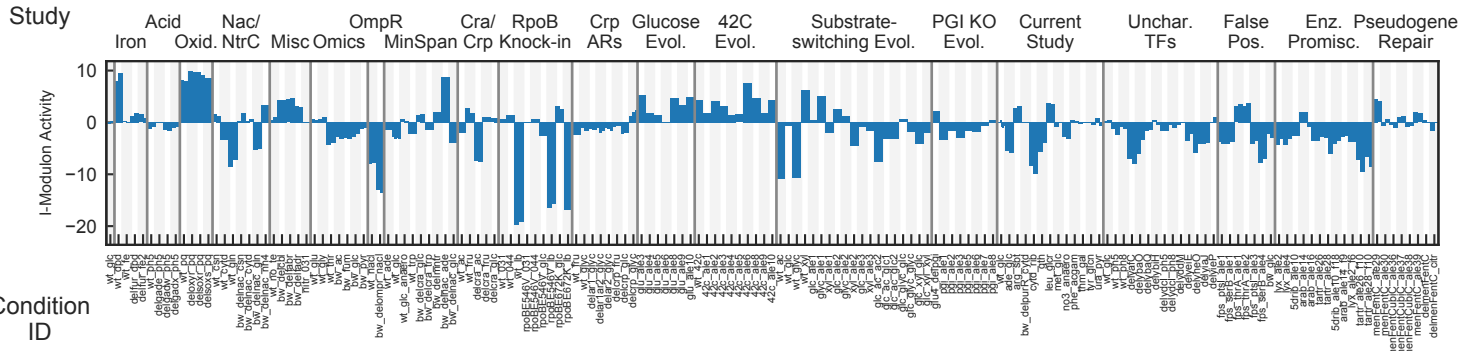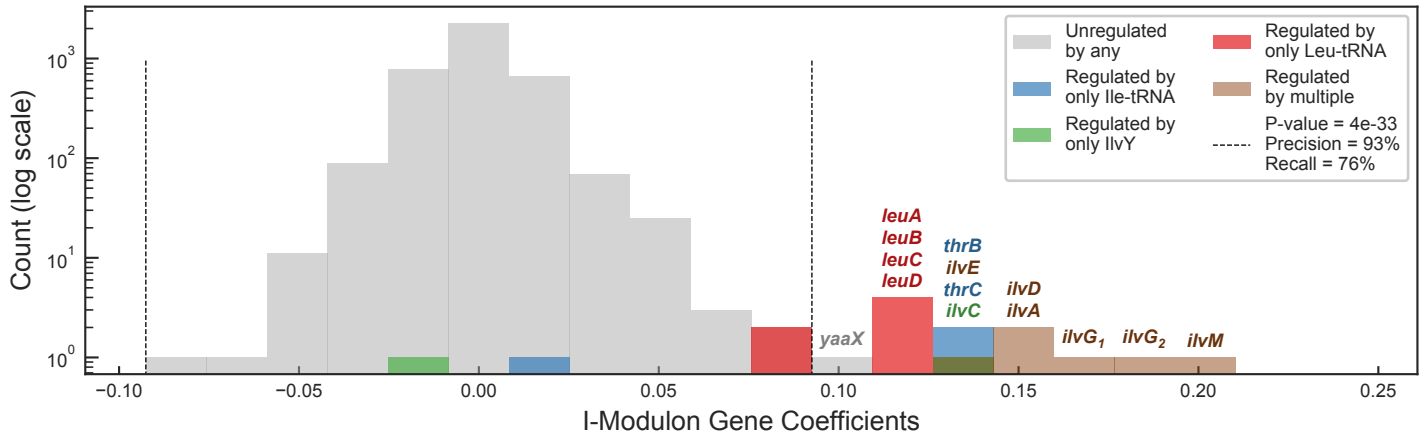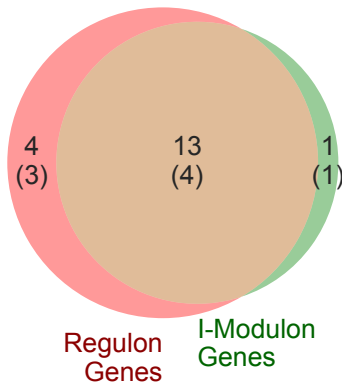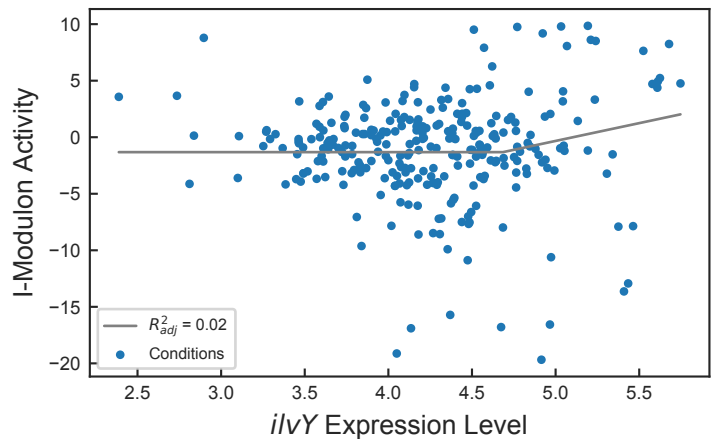

# Lrp I-Modulon

Regulated by: Lrp

Biological Function: Amino acid and peptide transport

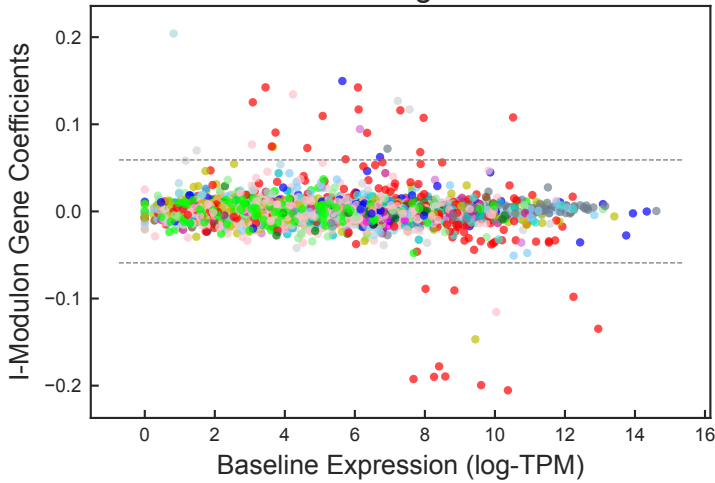

### COG Categories

- Amino acid transport and metabolism (24): *dadA, dtpA, dtpB, ilvC, ilvH, ilvI, leuE, livF, livG, livH, livJ, livK, livM, metE, oppA, oppD, oppF, sdaA, sdaB, sdaC, sstT, tdh, ydgl, yqeG*
- Inorganic ion transport and metabolism (3): *emrD, oppB, oppC*
- Carbohydrate transport and metabolism (2): *ydeE, yhjE*
- Cell wall/membrane/envelope biogenesis (2): *dadX, ddlA*
- Coenzyme transport and metabolism (1): *kbl*
- Other (5): *alaE, lysU, eco, stpA, yjbJ*

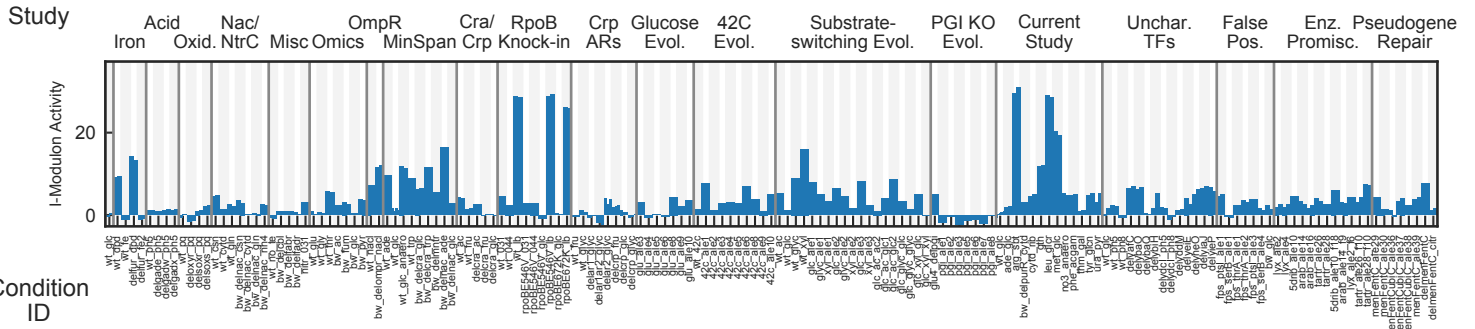

Condition ID

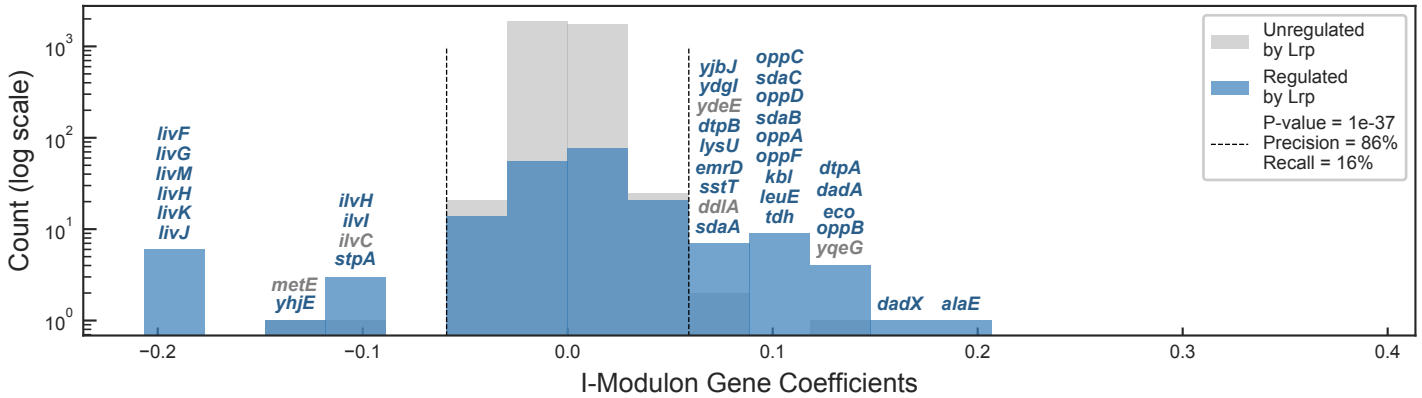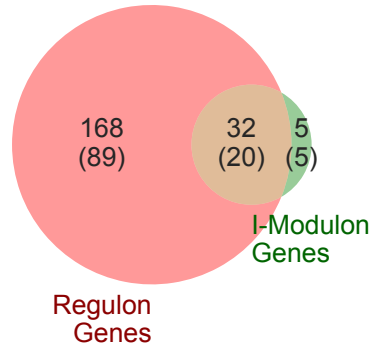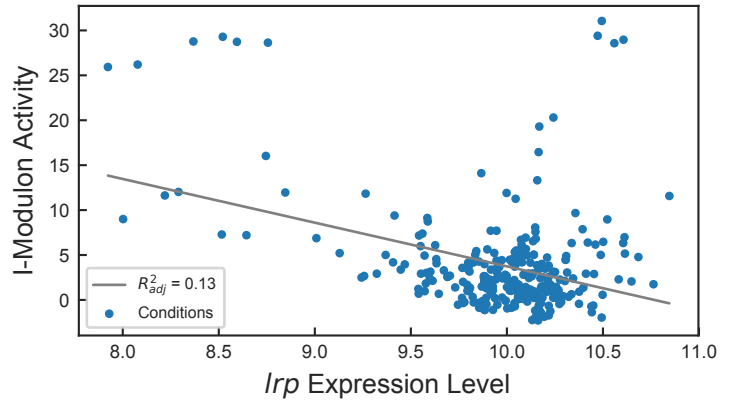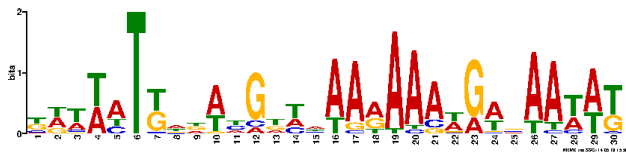

Motif E-value: 1.20e-04

Operons with Upstream Motif: 72%

# MaIT I-Modulon

Regulated by: MaIT

Biological Function: Maltose catabolism

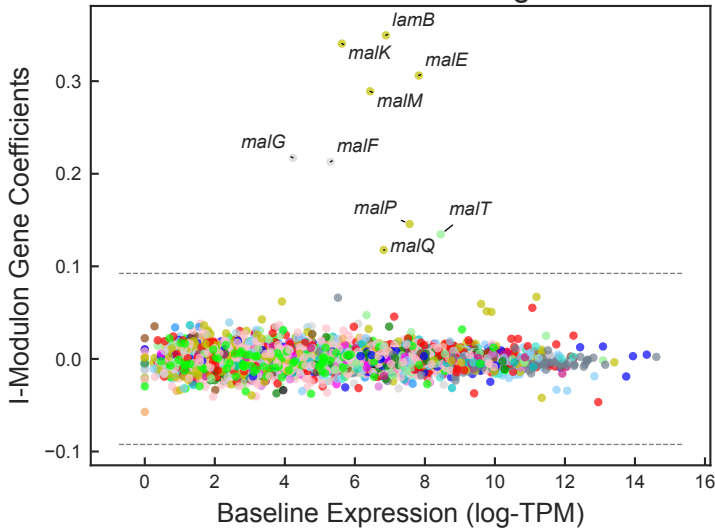

## COG Categories

- Carbohydrate transport and metabolism (6): *lamB*, *malE*, *malK*, *malM*, *malP*, *malQ*
- Inorganic ion transport and metabolism (2): *malF*, *malG*
- Transcription (1): *malT*

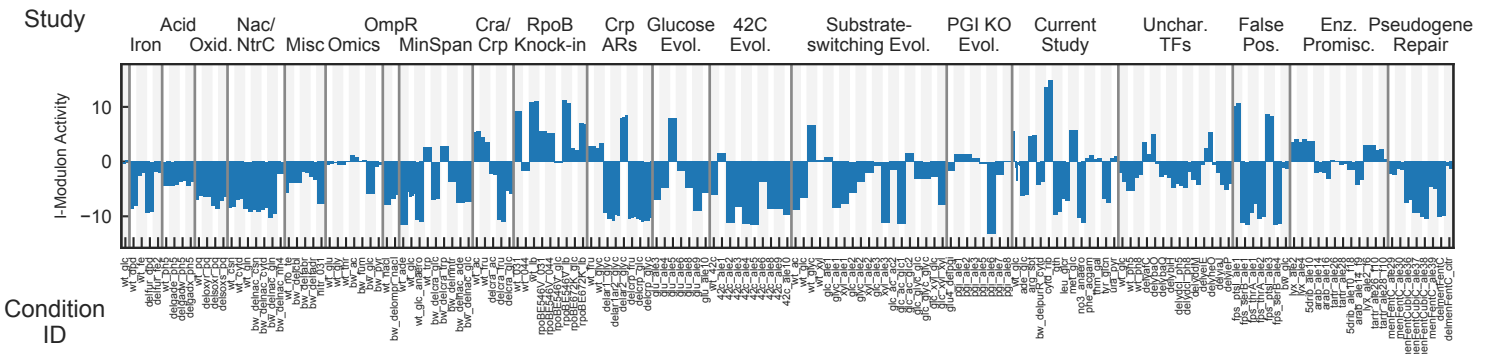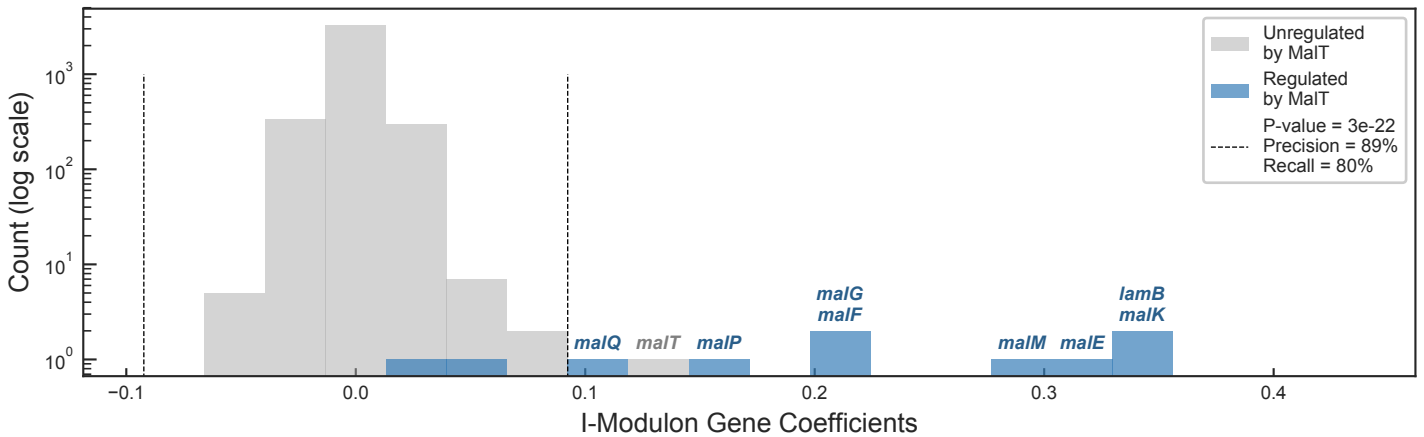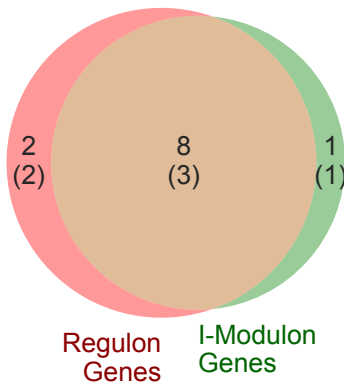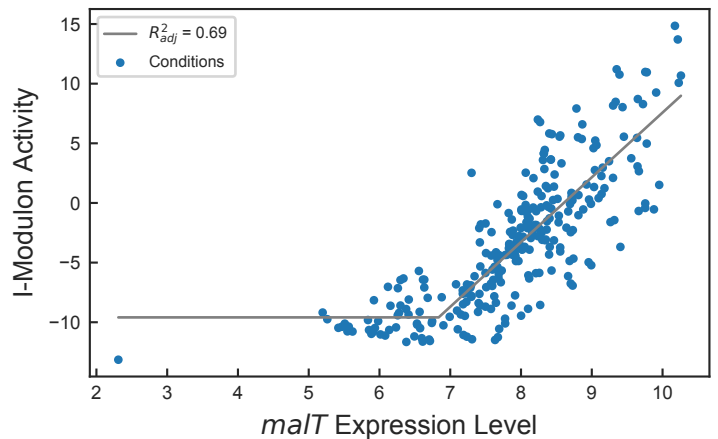

# MetJ I-Modulon

Regulated by: MetJ

Biological Function: Methionine biosynthesis

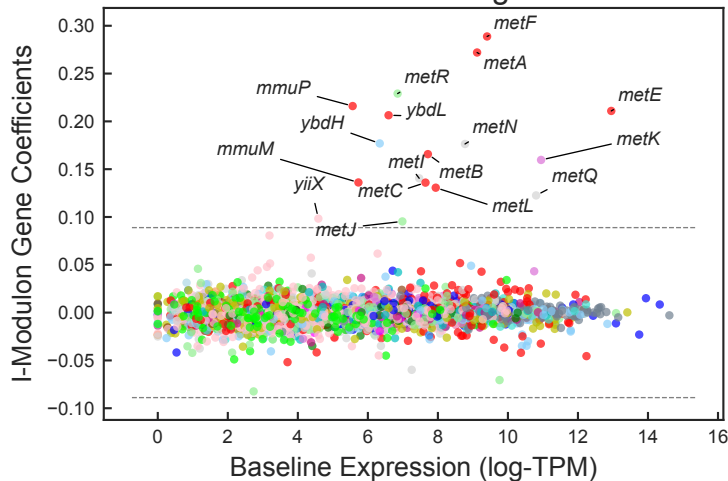

## COG Categories

- Amino acid transport and metabolism (9): *metA*, *metB*, *metC*, *metE*, *metF*, *metL*, *mmuM*, *mmuP*, *ybdL*
- Inorganic ion transport and metabolism (3): *metI*, *metN*, *metQ*
- Transcription (2): *metJ*, *metR*
- Coenzyme transport and metabolism (1): *metK*
- Energy production and conversion (1): *ybdH*
- Function unknown (1): *yixX*

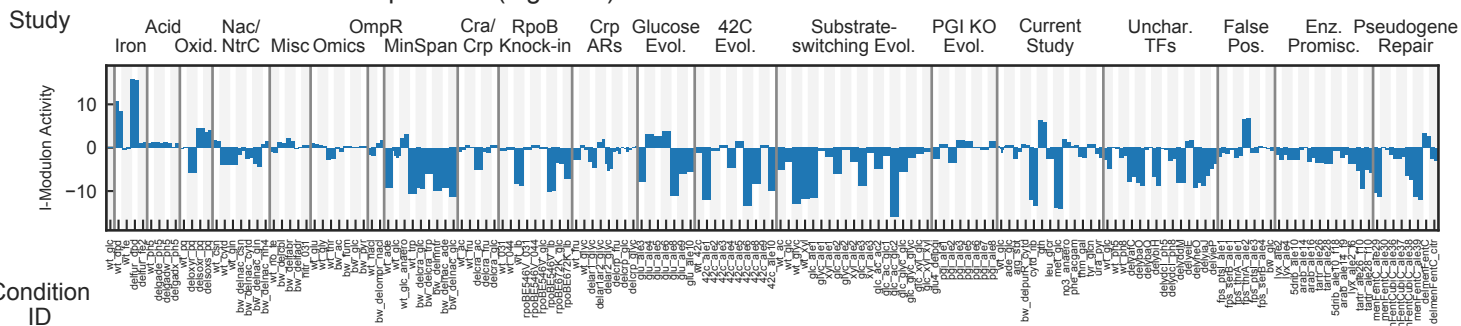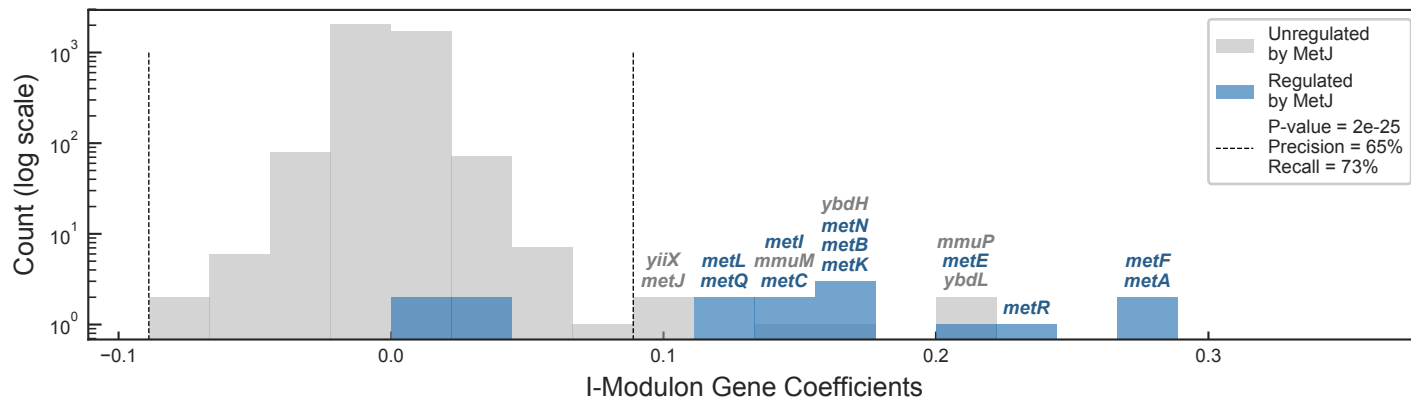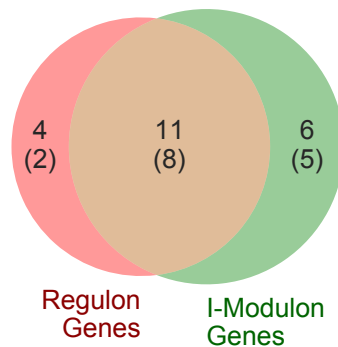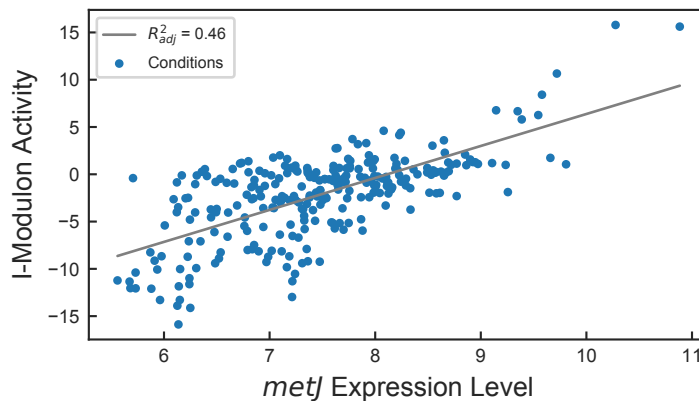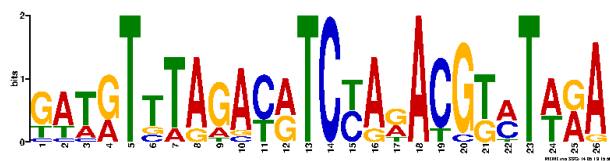

Motif E-value: 1.60e-37  
Operons with Upstream Motif: 92%

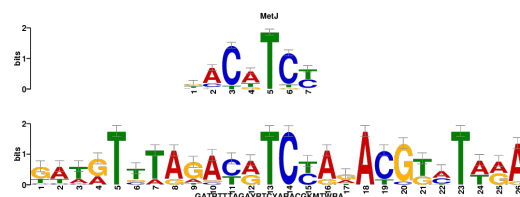

Motif similar to MetJ (E-value: 3.99e-03)

# Nac I-Modulon

Regulated by: Nac

Biological Function: Nitrogen starvation response

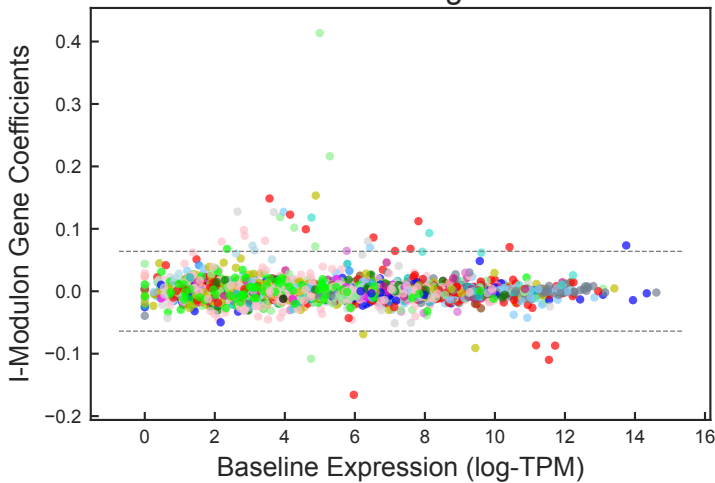

## COG Categories

- Amino acid transport and metabolism (12): *asnA, cycA, dppA, dppD, dppF, gabP, gabT, gltB, gltD, nanA, serA, ydcT*
- Transcription (6): *abgR, csiR, cynR, feaR, nac, yedL*
- Carbohydrate transport and metabolism (3): *shiA, ydcS, yhjE*
- Inorganic ion transport and metabolism (3): *dppB, ydcU, ydcV*
- Energy production and conversion (2): *gabD, patD*
- Intracellular trafficking, secretion, and vesicular transport (2): *gspC, gspE*
- Other (9): *codB, guaD, ompF, yieE, ghxQ, ybeQ, ygiL, yrhB, yrdE<sub>2</sub>*

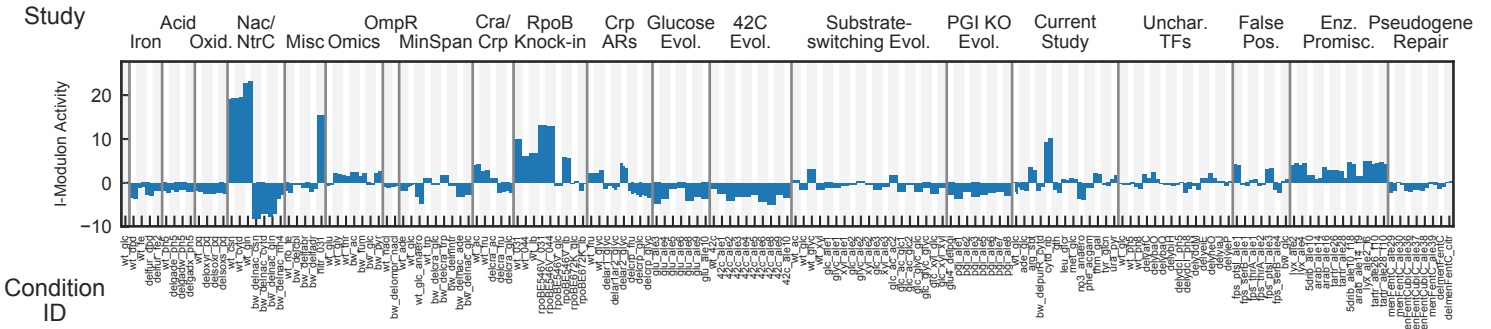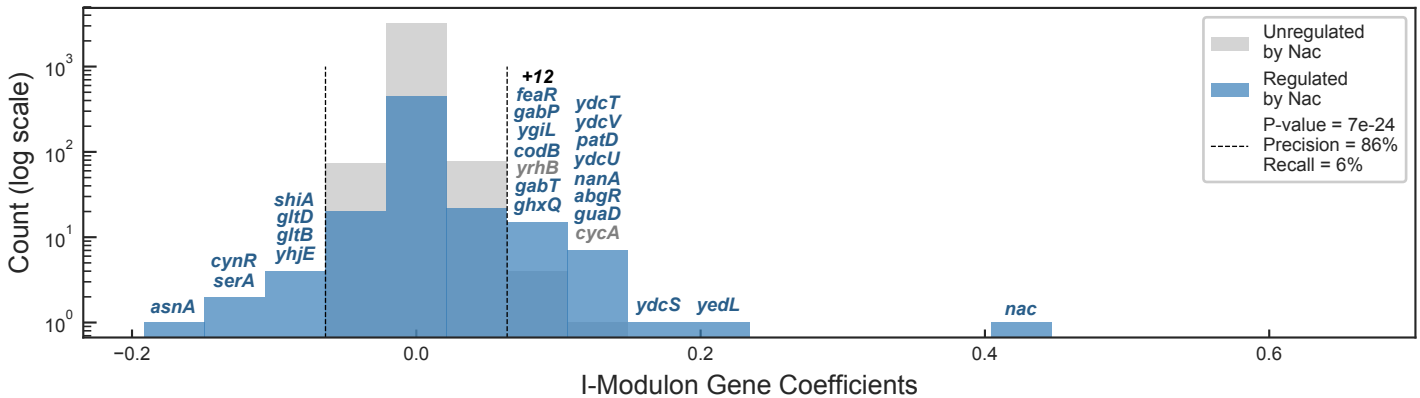

■ Unregulated by Nac  
 ■ Regulated by Nac  
 P-value = 7e-24  
 Precision = 86%  
 Recall = 6%

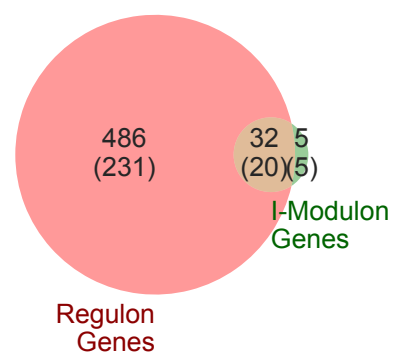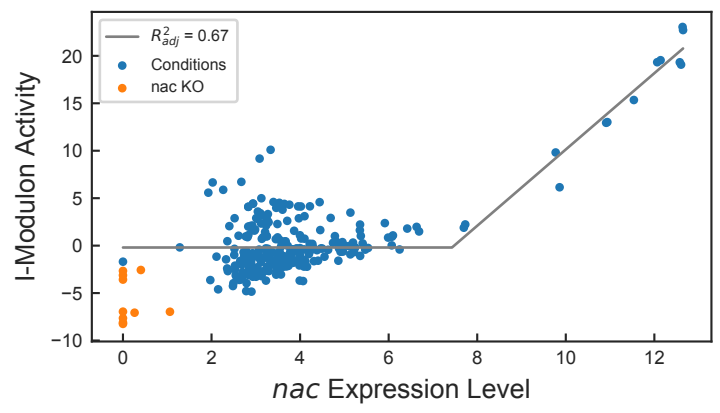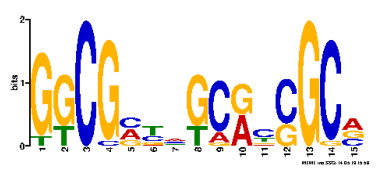

Motif E-value: 2.20e-08  
 Operons with Upstream Motif: 72%

# NagC/TyrR I-Modulon

Regulated by: NagC or TyrR

Biological Function: N-acetylglucosamine catabolism and tyrosine biosynthesis

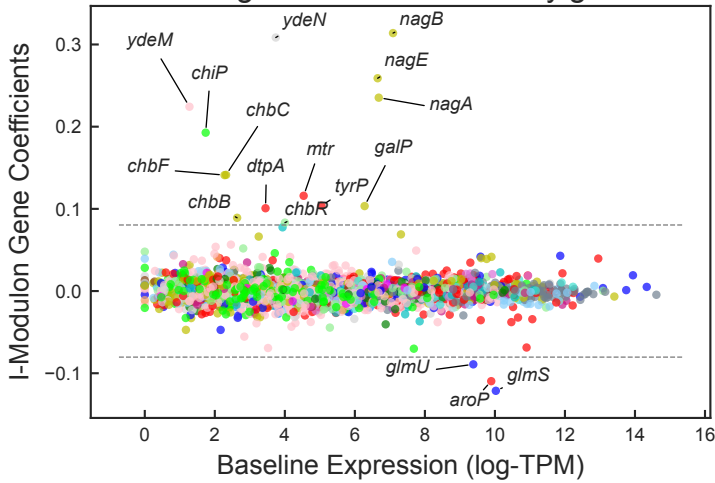

## COG Categories

- Carbohydrate transport and metabolism (7): *chbB*, *chbC*, *chbF*, *galP*, *nagA*, *nagB*, *nagE*
- Amino acid transport and metabolism (4): *aroP*, *dtpA*, *mtr*, *tyrP*
- Cell wall/membrane/envelope biogenesis (2): *glmS*, *glmU*
- Inorganic ion transport and metabolism (1): *ydeN*
- Transcription (1): *chbR*
- Function unknown (1): *ydeM*
- No COG Annotation (1): *chiP*

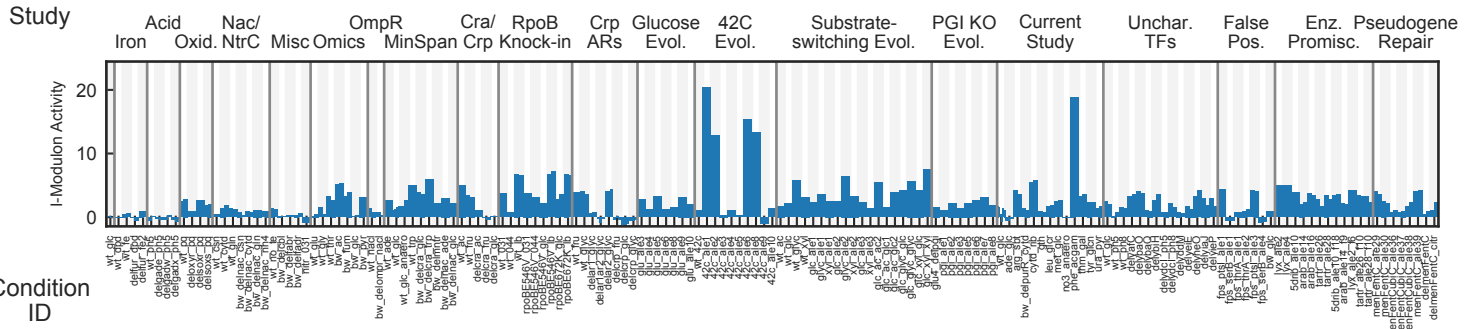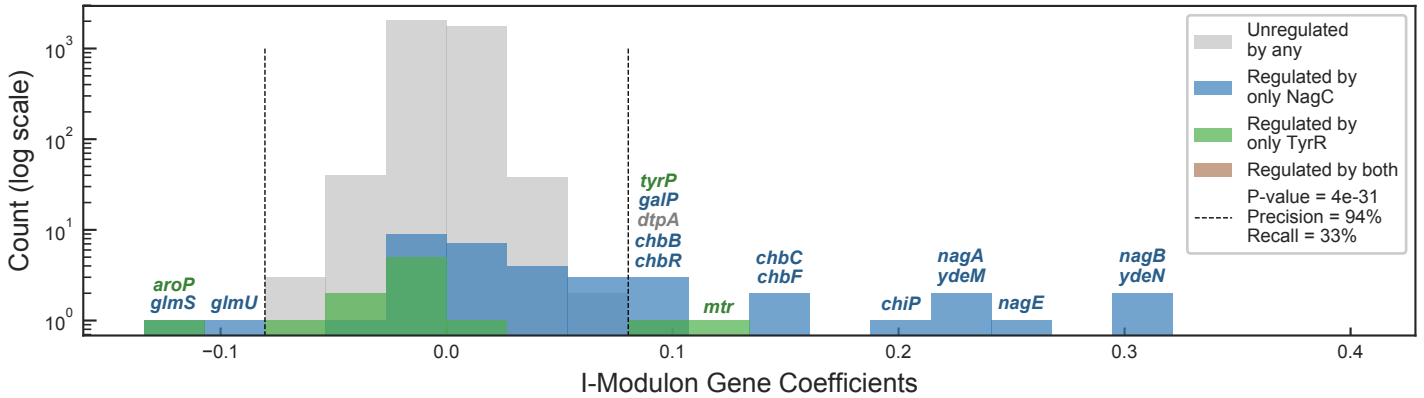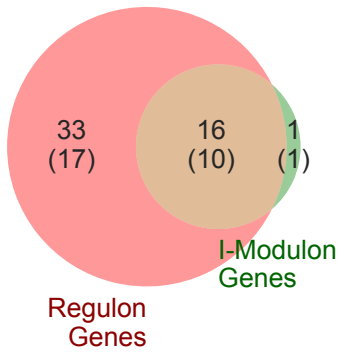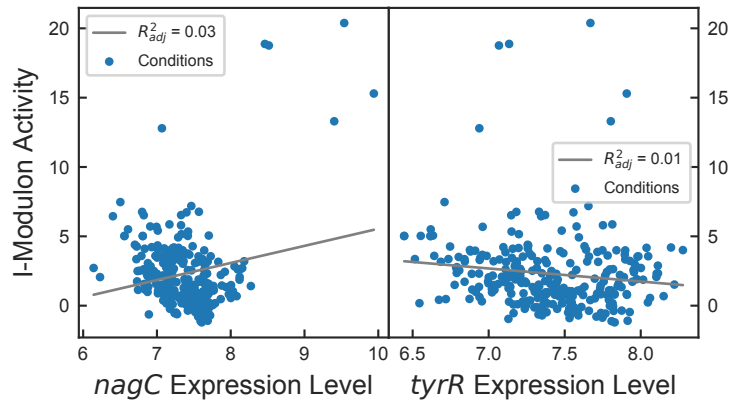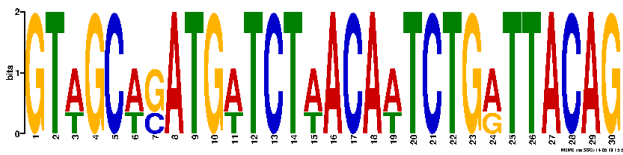

Motif E-value: 1.50e-04  
Operons with Upstream Motif: 27%

# NarL I-Modulon

Regulated by: NarL

Biological Function: Nitrate respiration

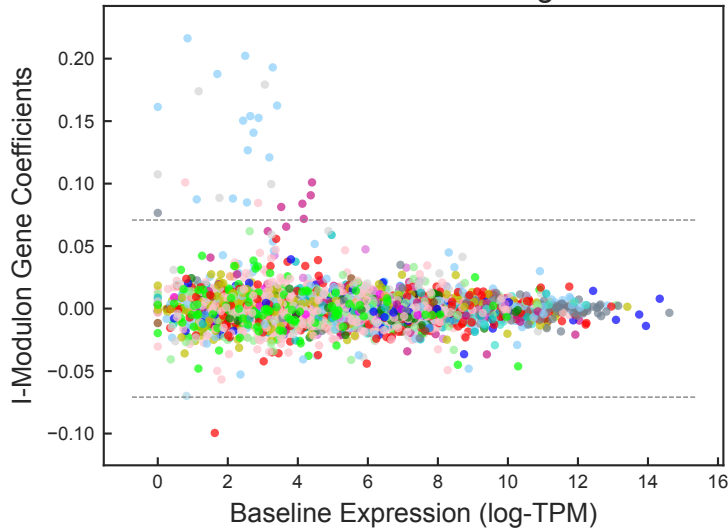

## COG Categories

- Energy production and conversion (15): *dmsB*, *napA*, *napB*, *napC*, *napF*, *napG*, *napH*, *narG*, *narH*, *narI*, *narJ*, *nirB*, *nirD*, *nrfB*, *nrfC*
- Inorganic ion transport and metabolism (5): *napD*, *narK*, *nirC*, *nrfA*, *nrfD*
- Posttranslational modification, protein turnover, chaperones (5): *ccmA*, *ccmC*, *ccmE*, *ccmF*, *dsbE*
- Amino acid transport and metabolism (1): *nika*
- Translation, ribosomal structure and biogenesis (1): *ykgO*
- Function unknown (2): *dmsC*, *yehD*

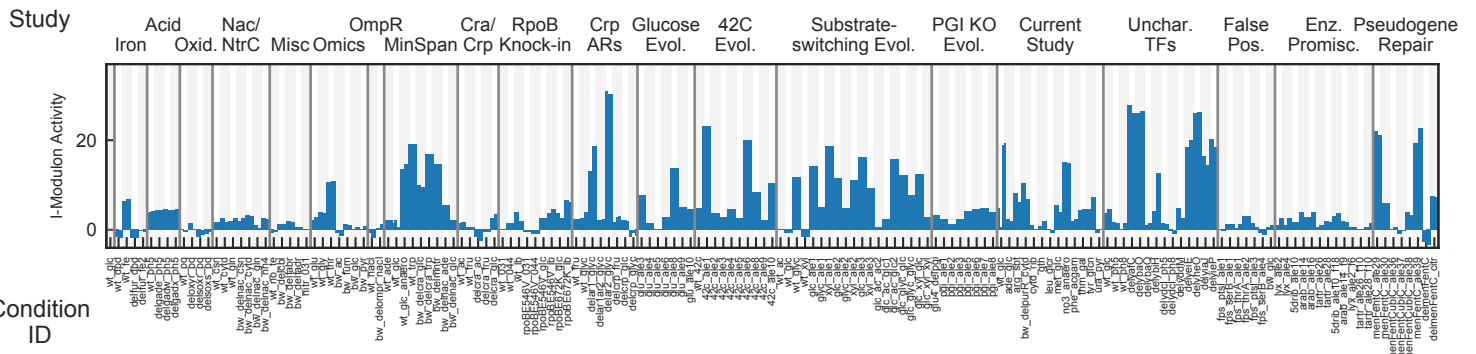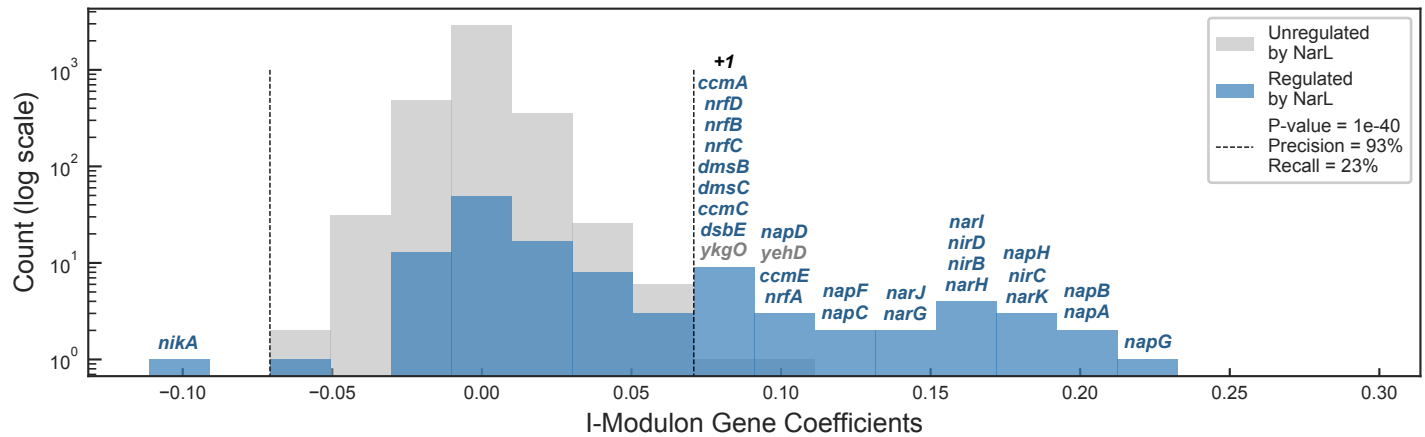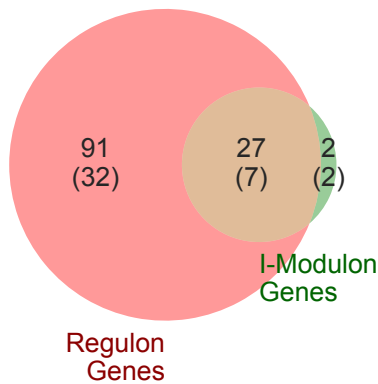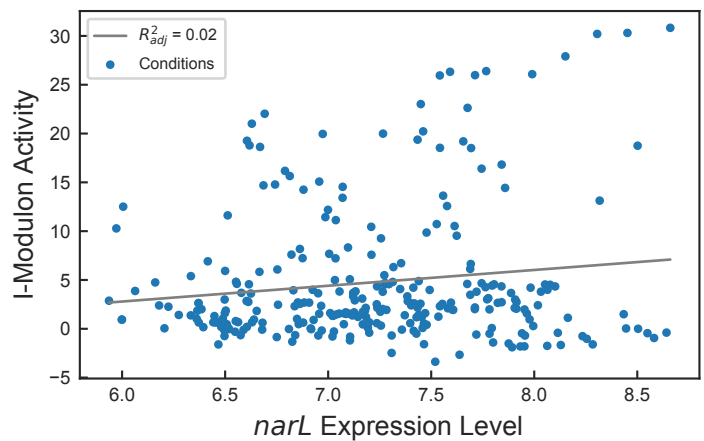



# NikR I-Modulon

Regulated by: NikR

Biological Function: Nickel homeostasis

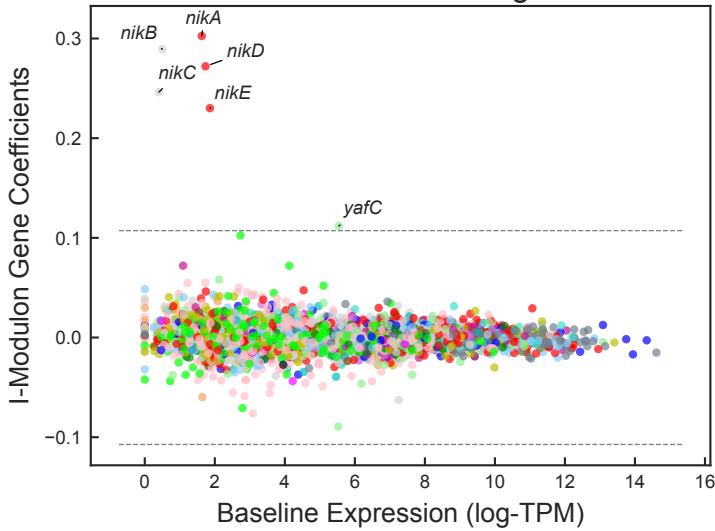

## COG Categories

- Amino acid transport and metabolism (3): *nikA*, *nikD*, *nikE*
- Inorganic ion transport and metabolism (2): *nikB*, *nikC*
- Transcription (1): *yafC*

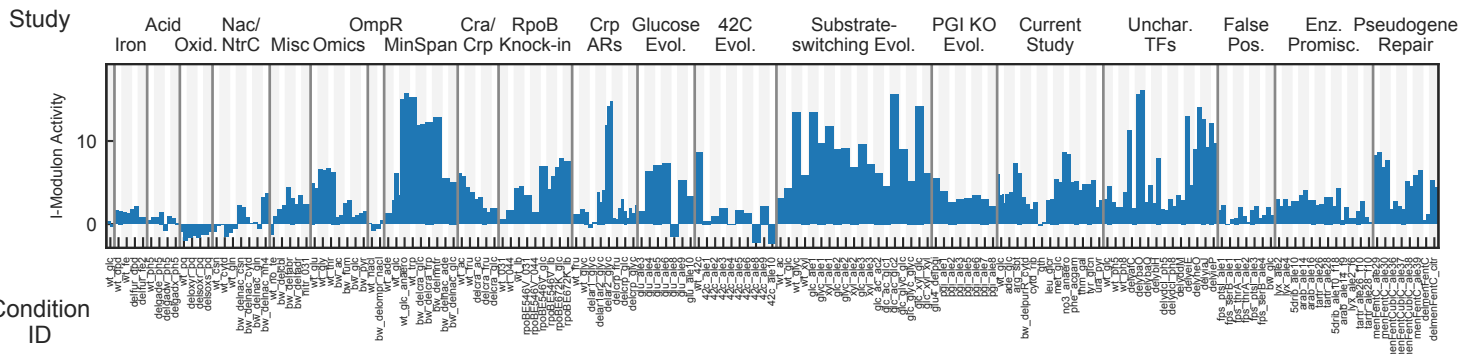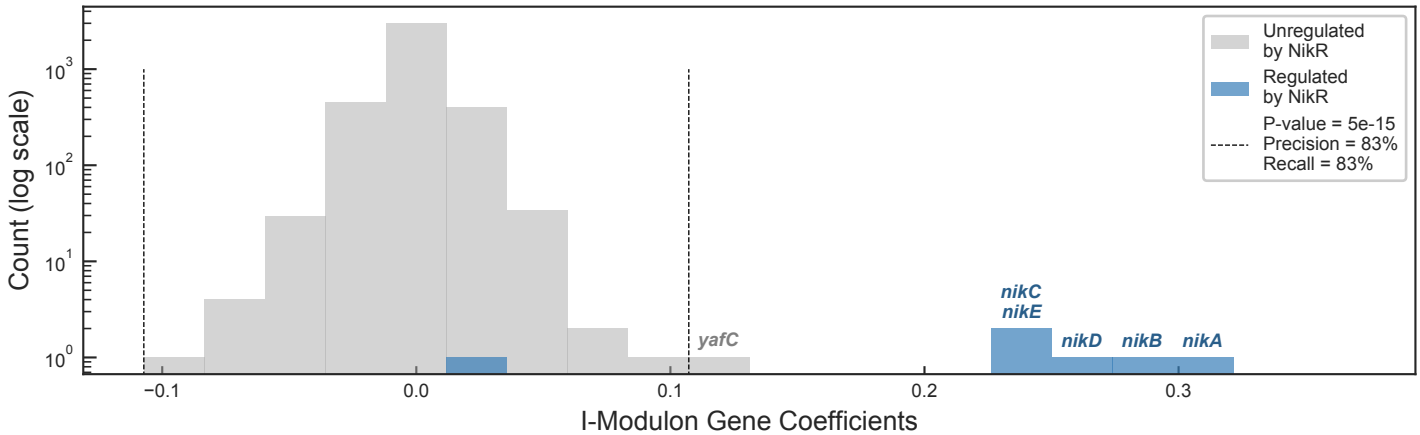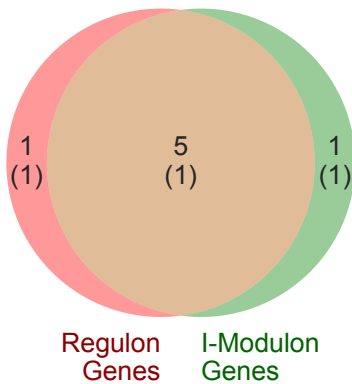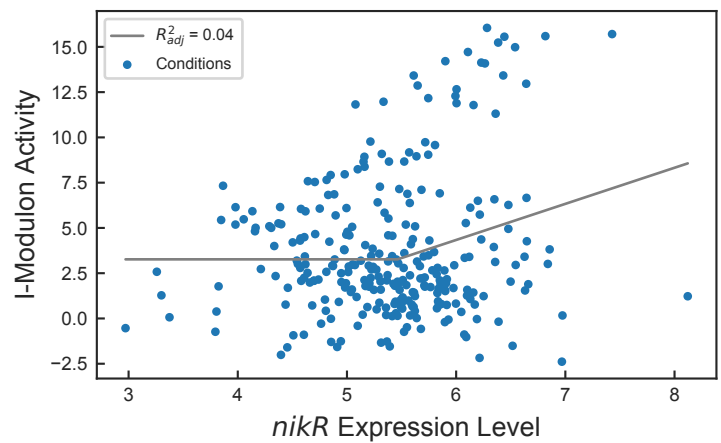

# NtrC + RpoN I-Modulon

Regulated by: NtrC and RpoN

Biological Function: Nitrogen starvation response

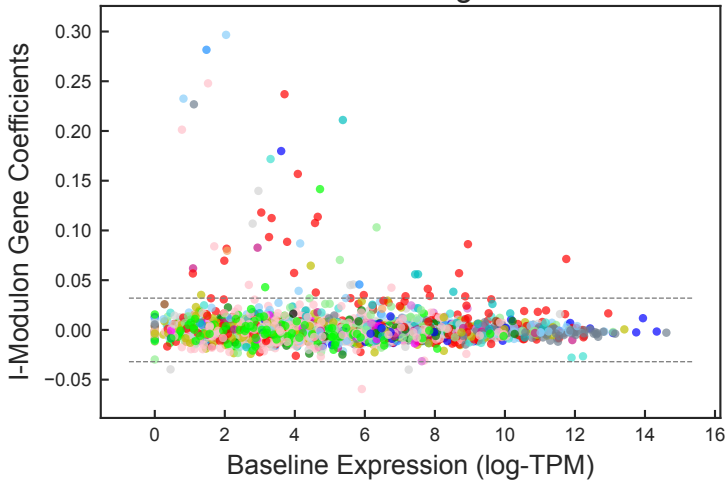

## COG Categories

- Amino acid transport and metabolism (21): *argT, asnA, asnB, astA, astB, astC, astE, ddpA, ddpD, ddpF, gabP, glnA, glnK, gtlI, hisP, patA, potF, ygeW, yhdX, yhdY, yhdZ*
- Inorganic ion transport and metabolism (6): *chaC, ddpB, ddpC, mgtA, rcnA, yeaR*
- Energy production and conversion (5): *astD, fdhF, lhgO, rutA, rutE*
- Signal transduction mechanisms (4): *amtB, glnG, glnL, yeaG*
- Carbohydrate transport and metabolism (2): *prpB, ynfM*
- Other (18): *hypA, yqeB, csiD, rutB, cbl, yedL, zraP, ddpX, rutG, rutC, mgrB, rutD, rutF, yeaE, yeaH, yqeC, asr, yhdW<sub>2</sub>*

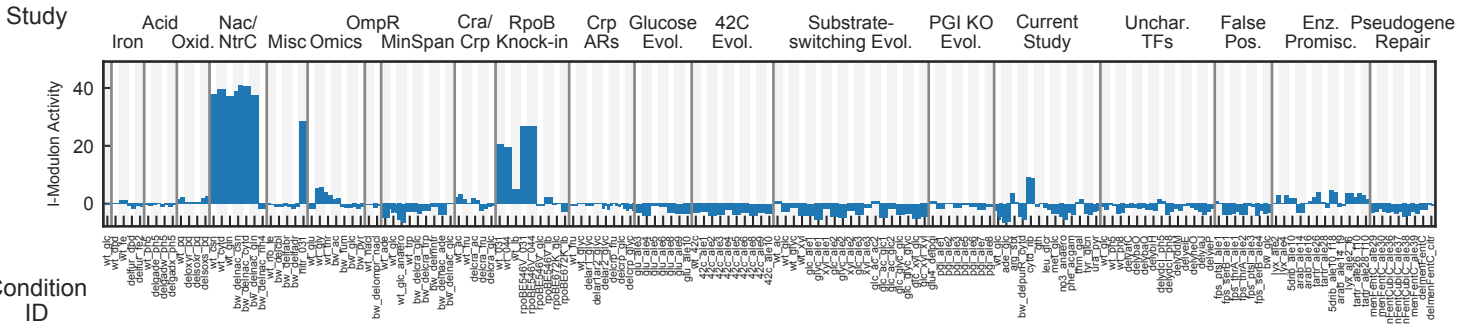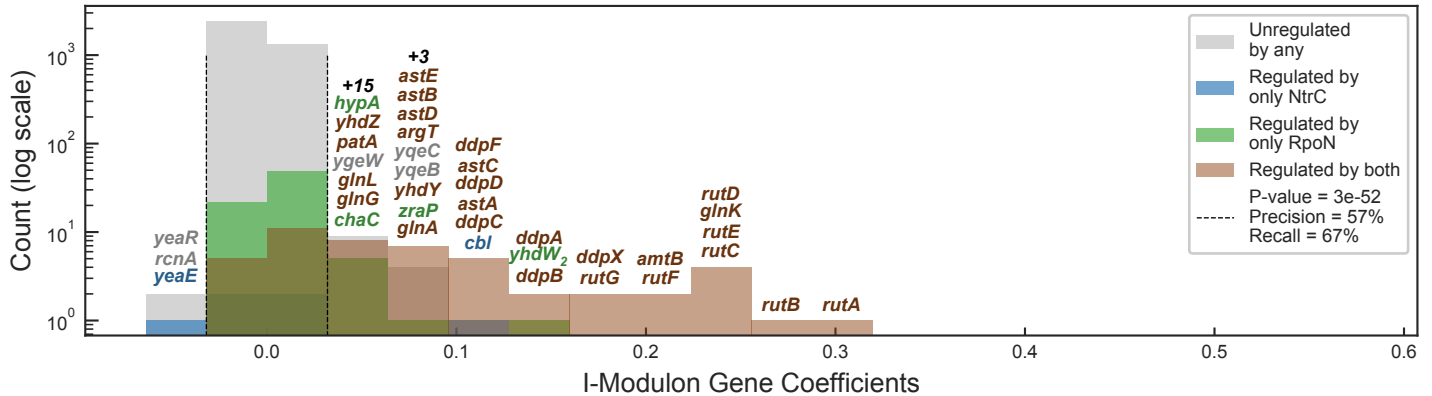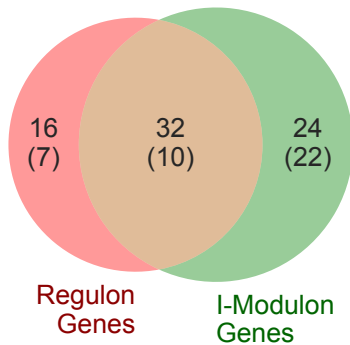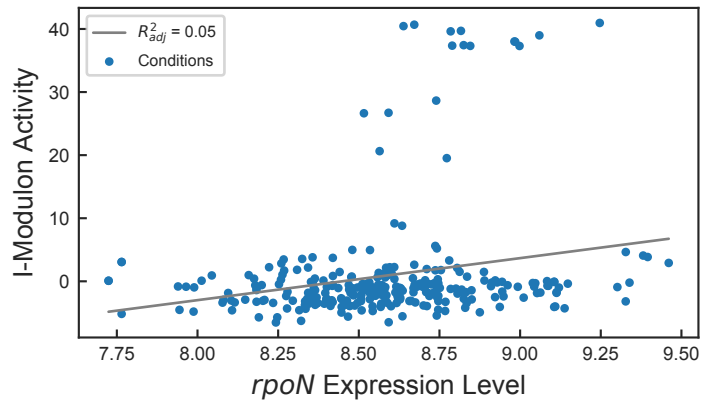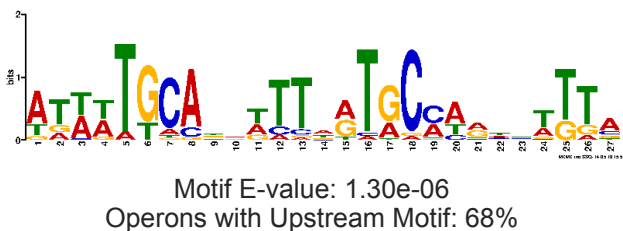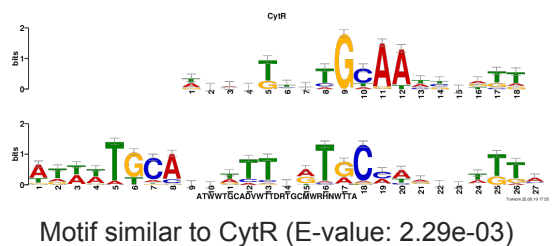

# OxyR I-Modulon

Regulated by: OxyR

Biological Function: Peroxide reductases

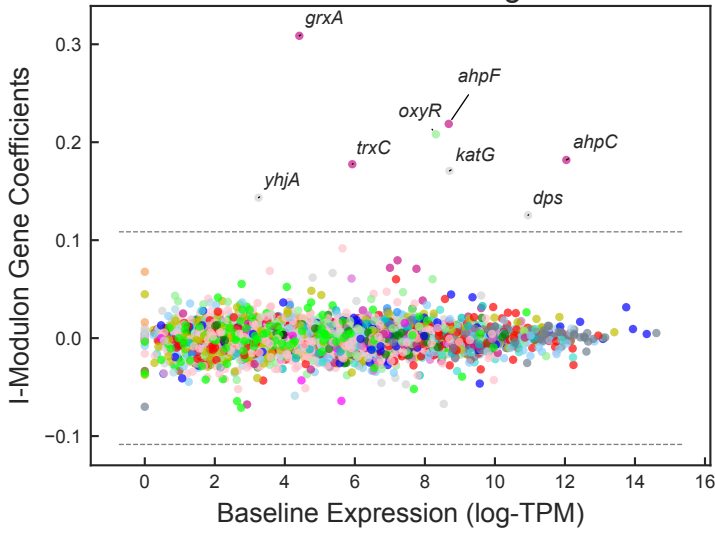

## COG Categories

- Posttranslational modification, protein turnover, chaperones (4): *ahpC*, *ahpF*, *grxA*, *trxC*
- Inorganic ion transport and metabolism (3): *dps*, *katG*, *yhjA*
- Transcription (1): *oxyR*

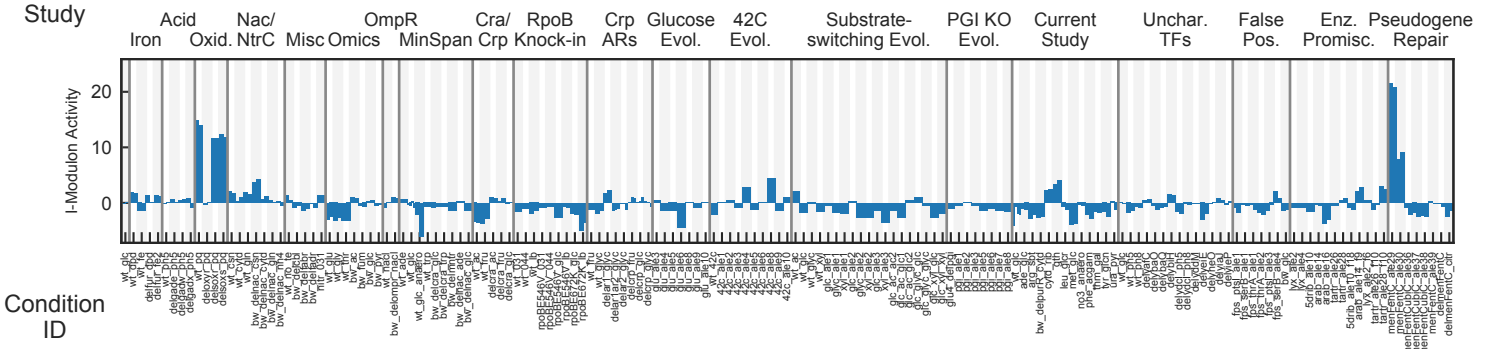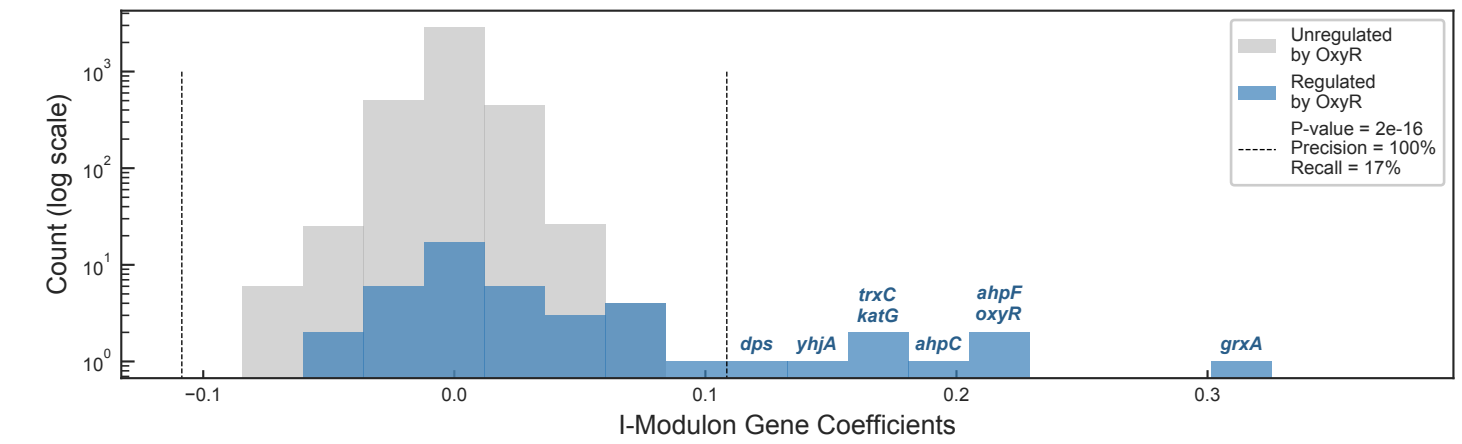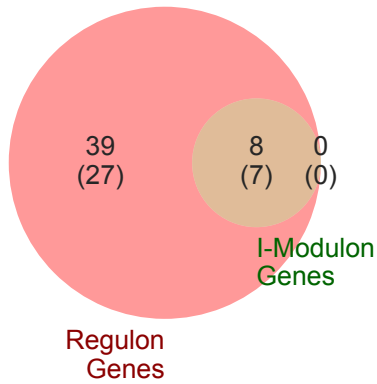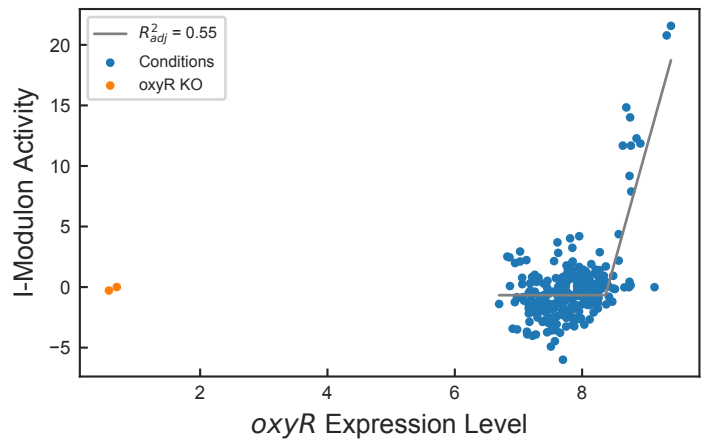

# PrpR I-Modulon

Regulated by: PrpR

Biological Function: Propionate catabolism

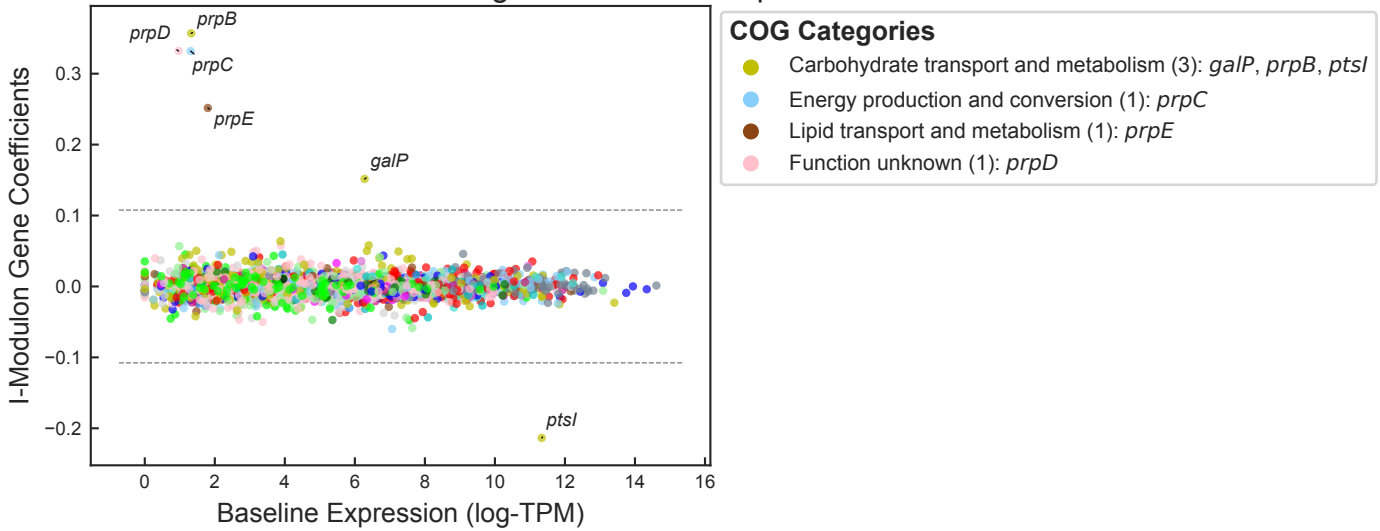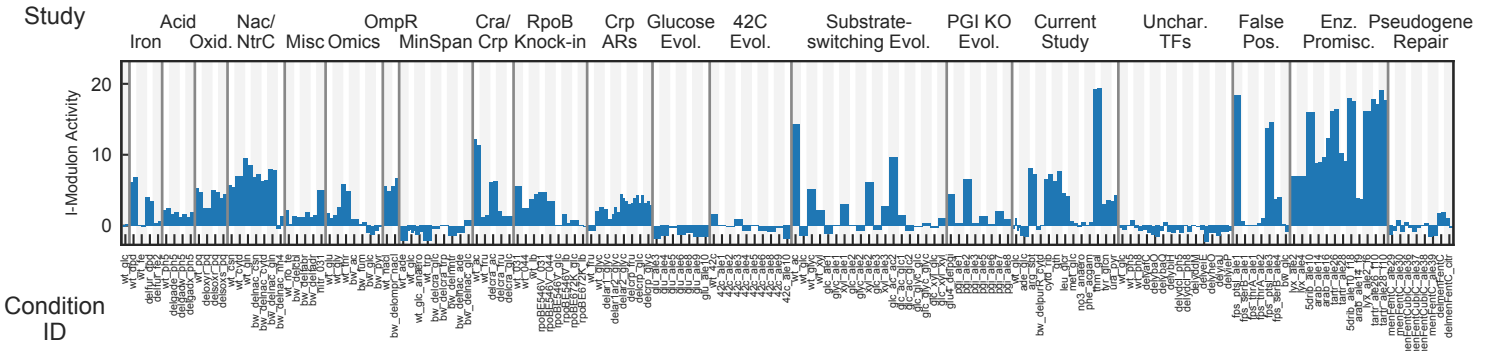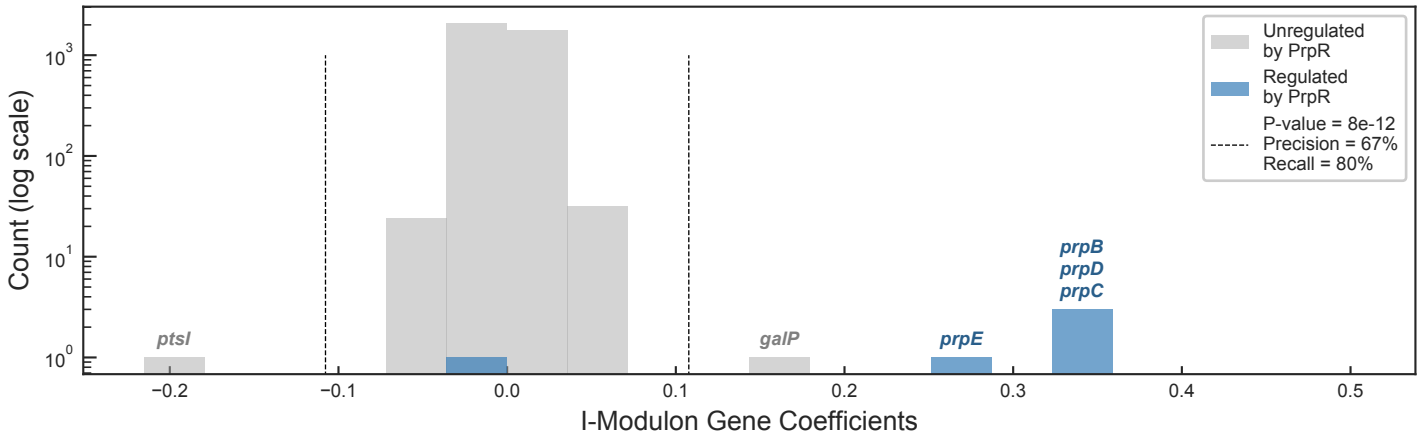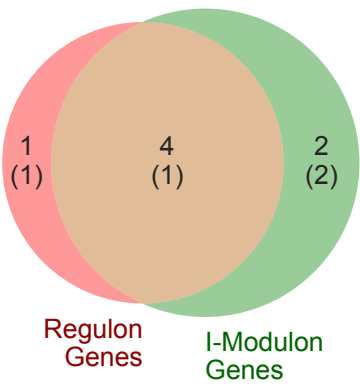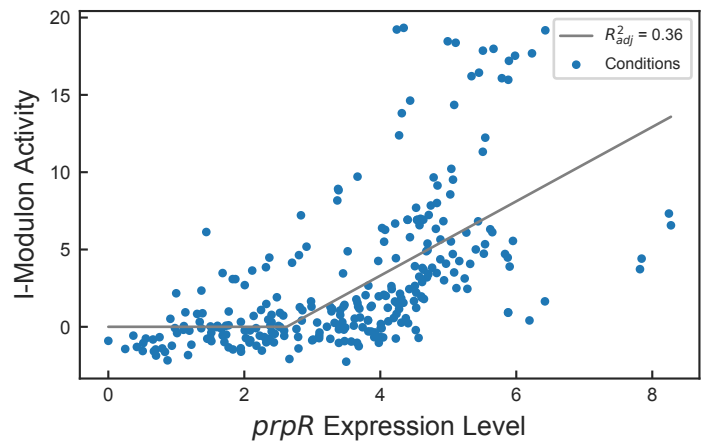

# PurR – 1 I-Modulon

Regulated by: PurR

Biological Function: Purine Biosynthesis

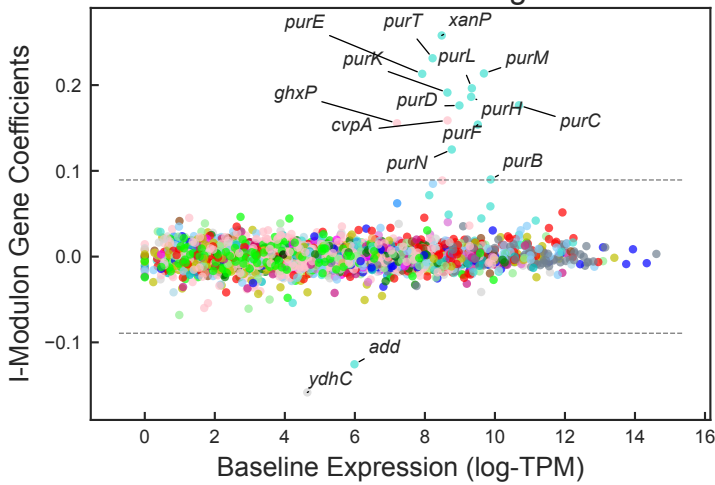

## COG Categories

- Nucleotide transport and metabolism (13): *add*, *purB*, *purC*, *purD*, *purE*, *purF*, *purH*, *purK*, *purL*, *purM*, *purN*, *purT*, *xanP*
- Inorganic ion transport and metabolism (1): *ydhC*
- Function unknown (2): *cvpA*, *ghxP*

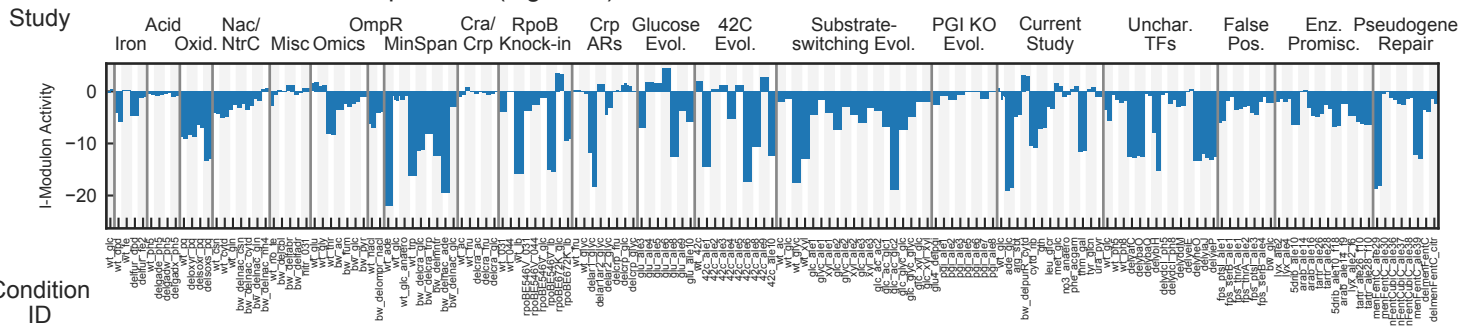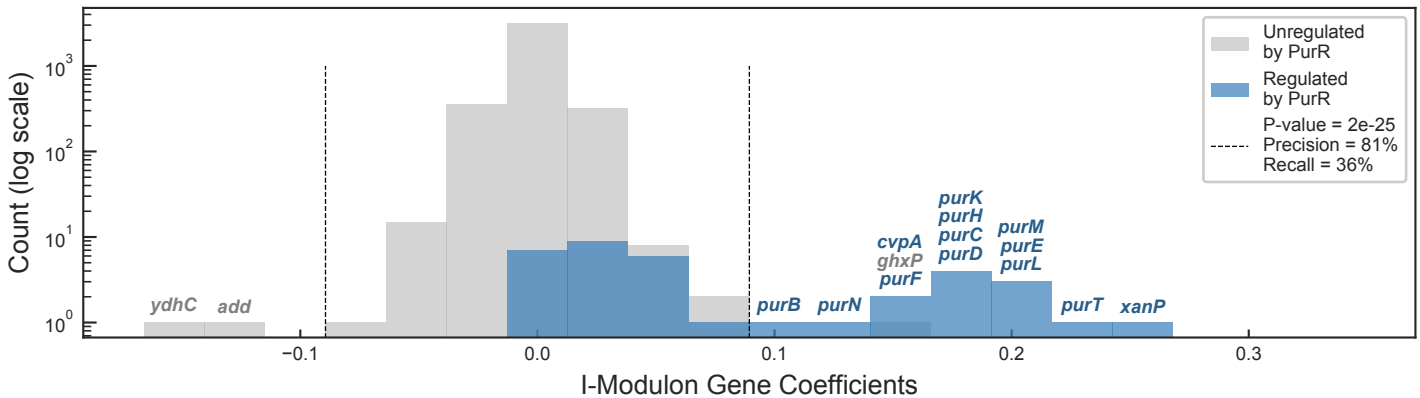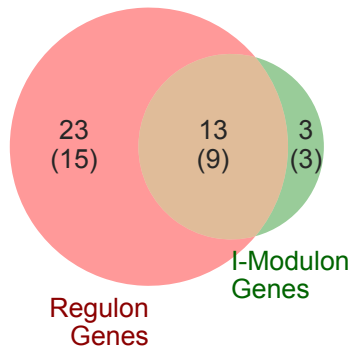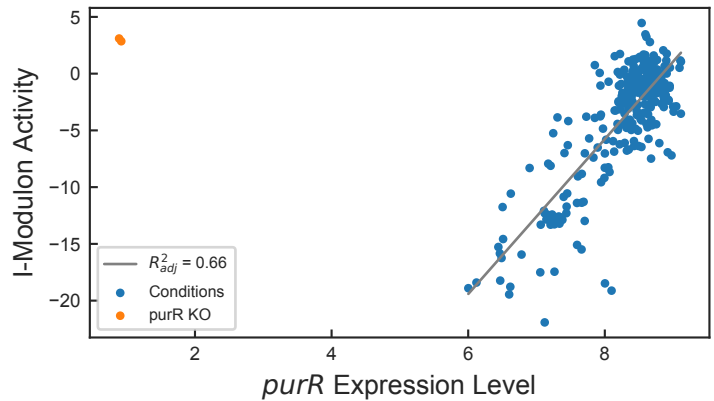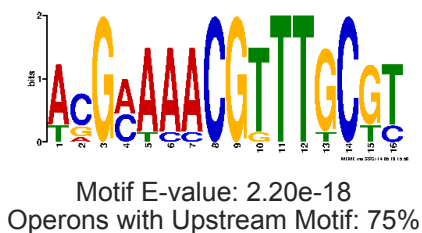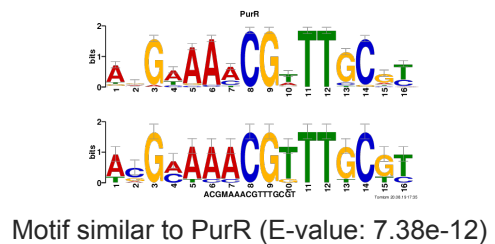

# PurR – 2 I-Modulon

Regulated by: PurR

Biological Function: Pyrimidine biosynthesis

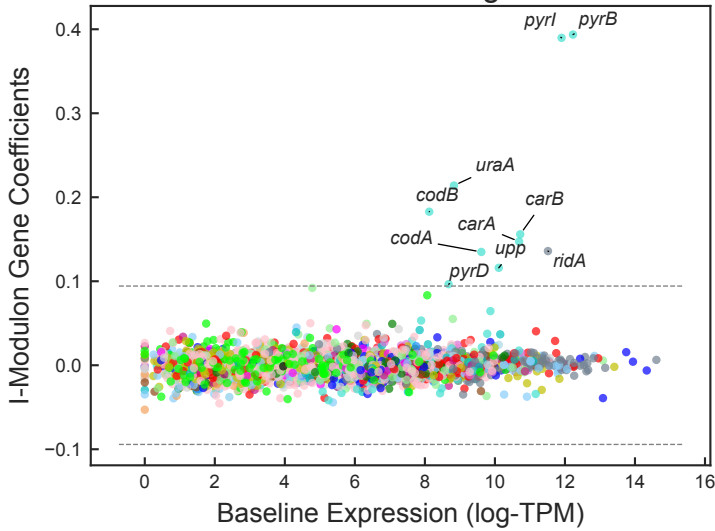

## COG Categories

- Nucleotide transport and metabolism (9): *carA*, *carB*, *codA*, *codB*, *pyrB*, *pyrD*, *pyrI*, *upp*, *uraA*
- Translation, ribosomal structure and biogenesis (1): *ridA*

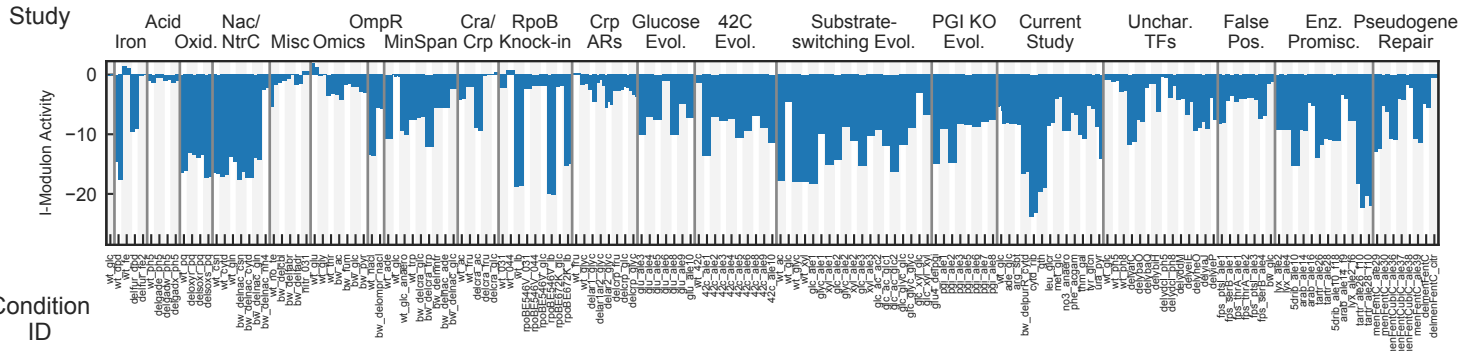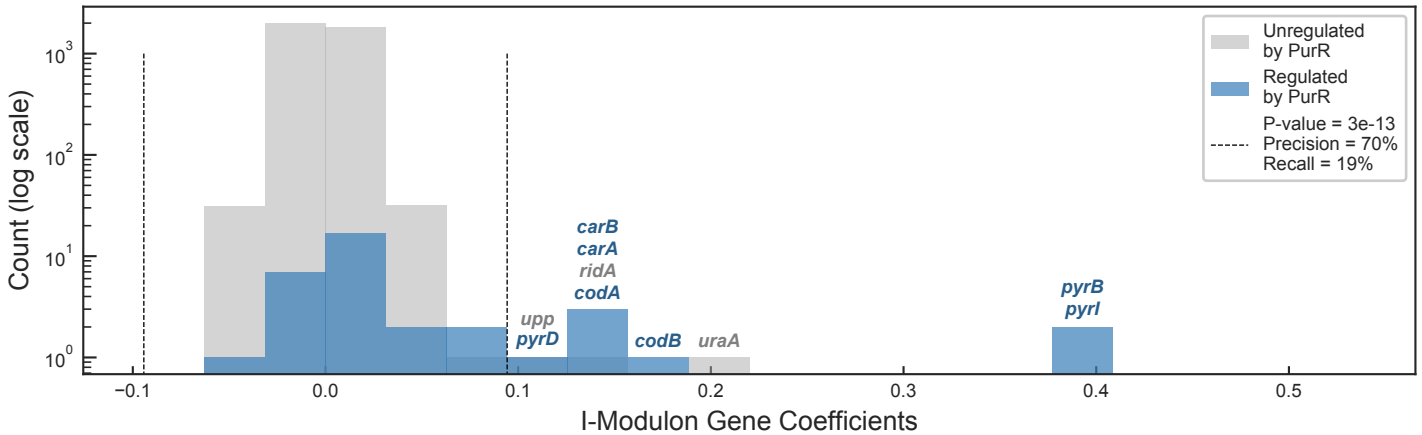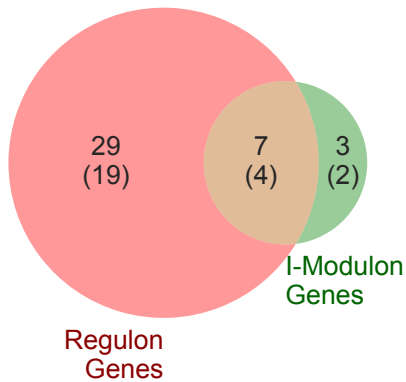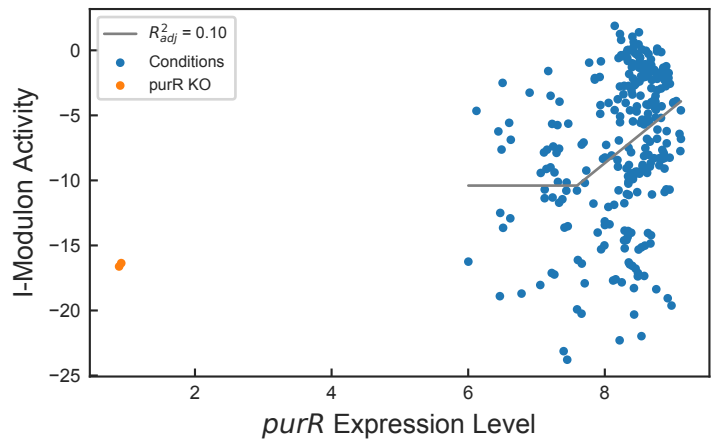

# PuuR I-Modulon

Regulated by: PuuR

Biological Function: Putrescine catabolism

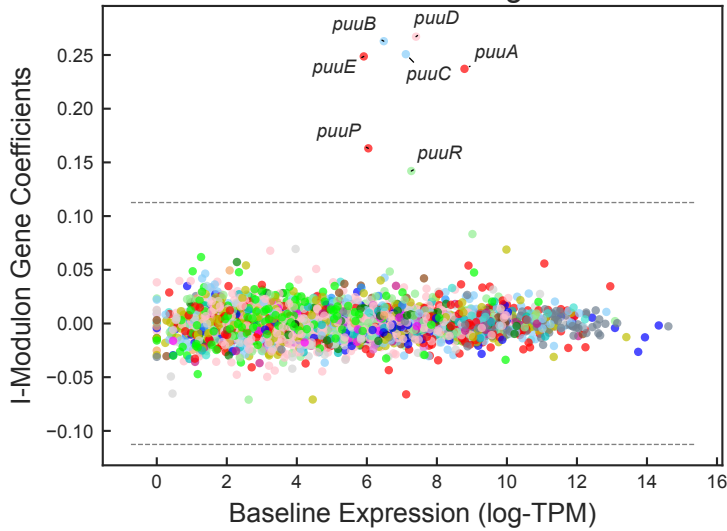

## COG Categories

- Amino acid transport and metabolism (3): *puuA*, *puuE*, *puuP*
- Energy production and conversion (2): *puuB*, *puuC*
- Transcription (1): *puuR*
- Function unknown (1): *puuD*

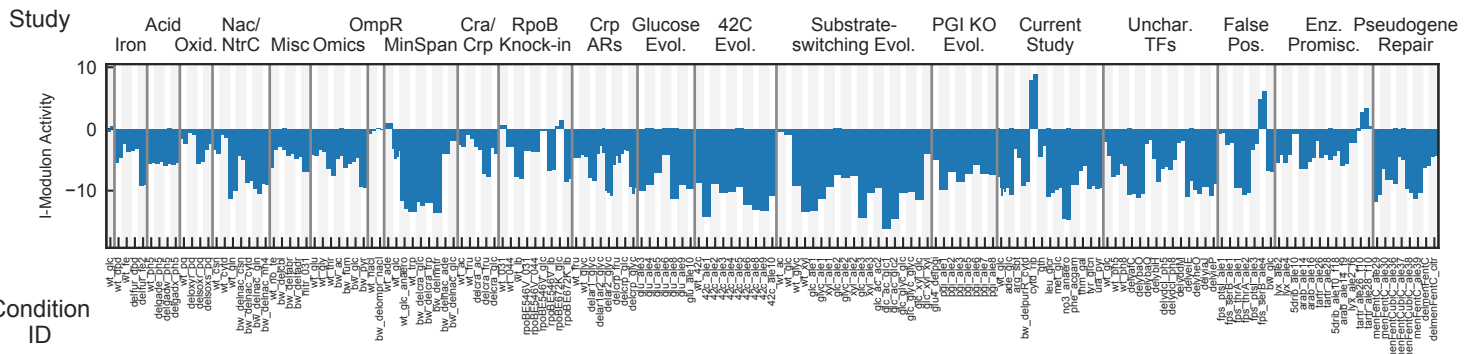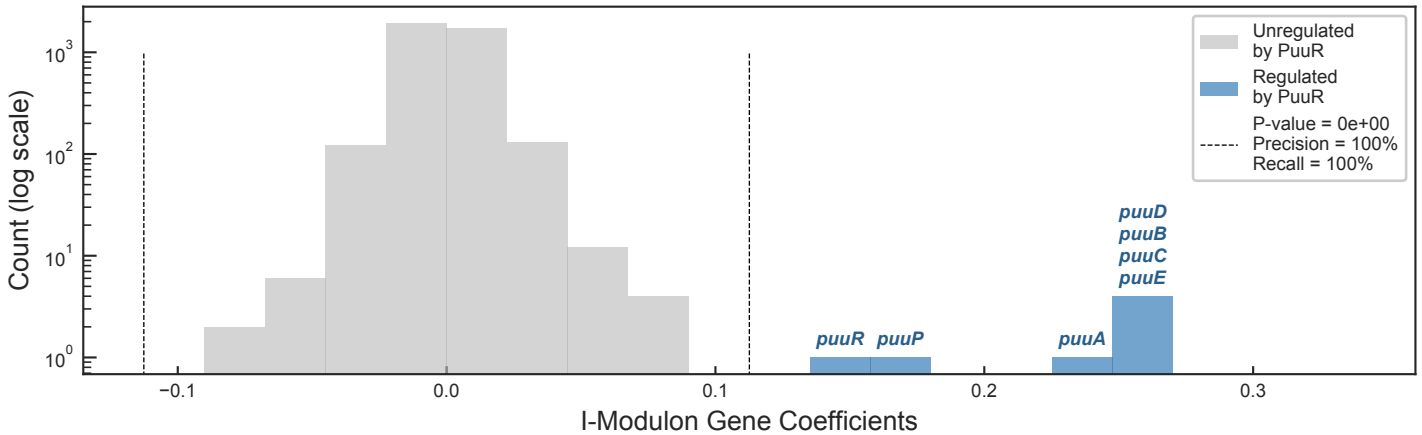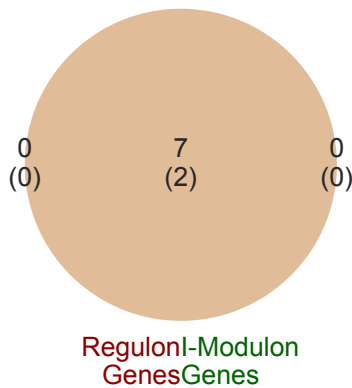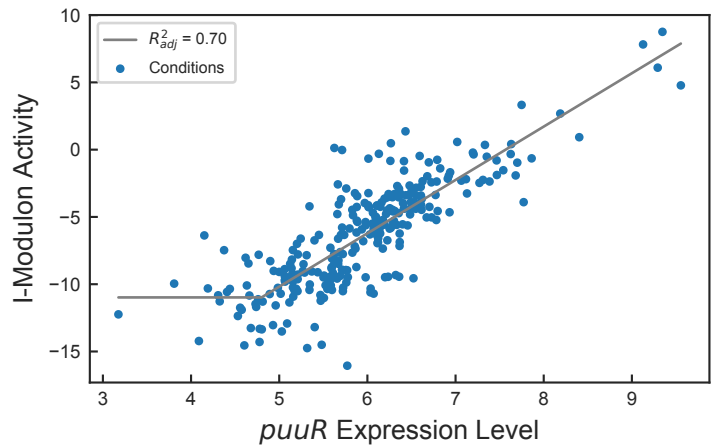

# Pyruvate I-Modulon

Regulated by: BtsR or YpdB or PdhR

Biological Function: Pyruvate transport and metabolism

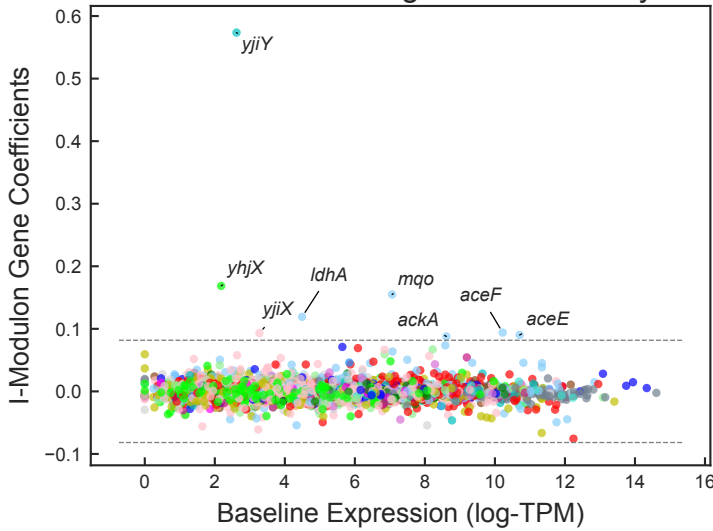

## COG Categories

- Energy production and conversion (5): *aceE*, *aceF*, *ackA*, *ldhA*, *mgo*
- Signal transduction mechanisms (1): *yjiY*
- Function unknown (1): *yjiX*
- No COG Annotation (1): *yhjX*

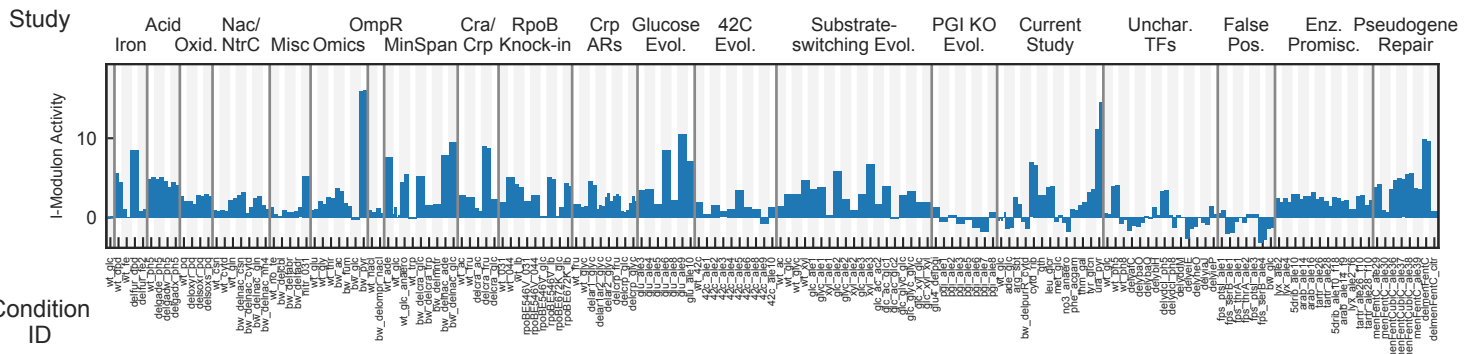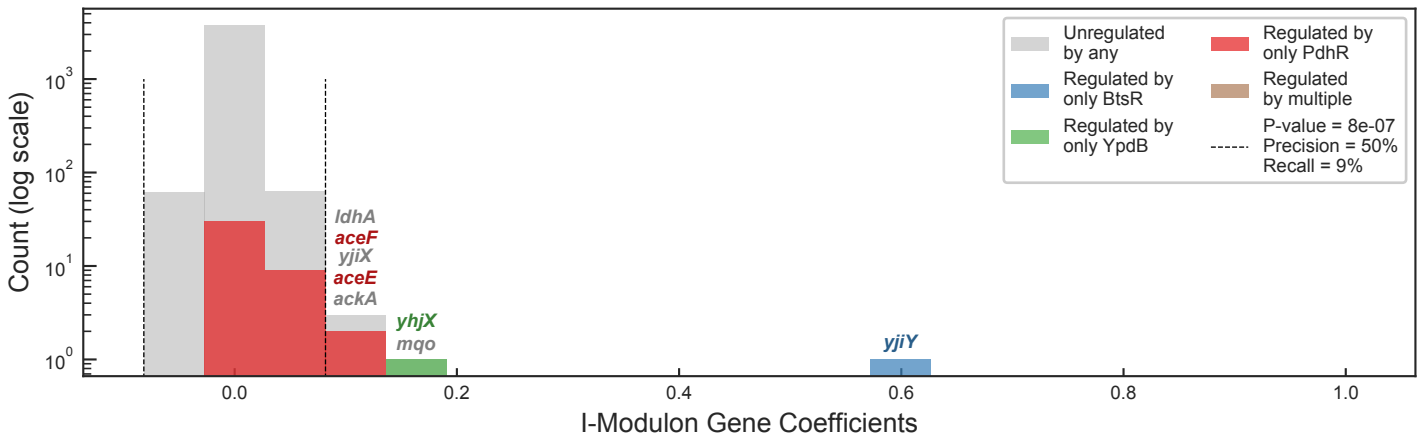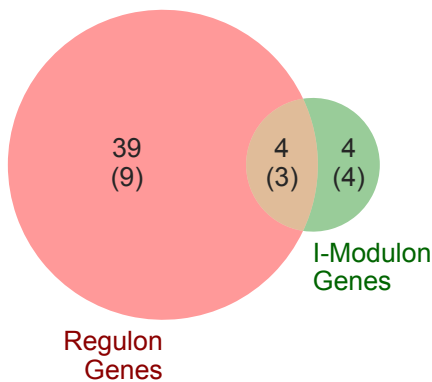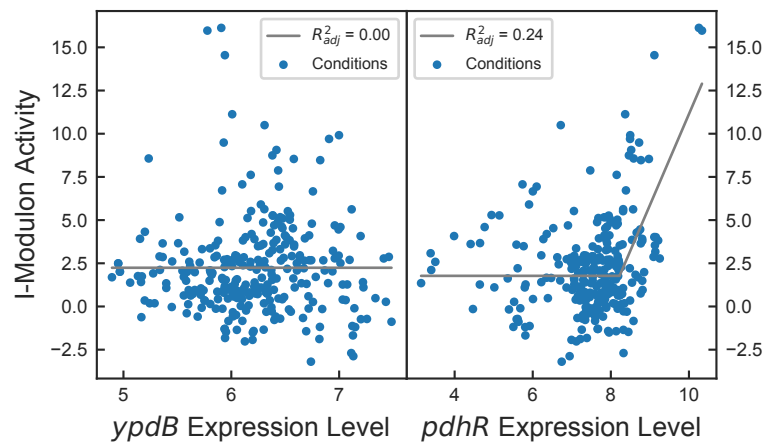



# RbsR I-Modulon

Regulated by: RbsR

Biological Function: D-ribose catabolism

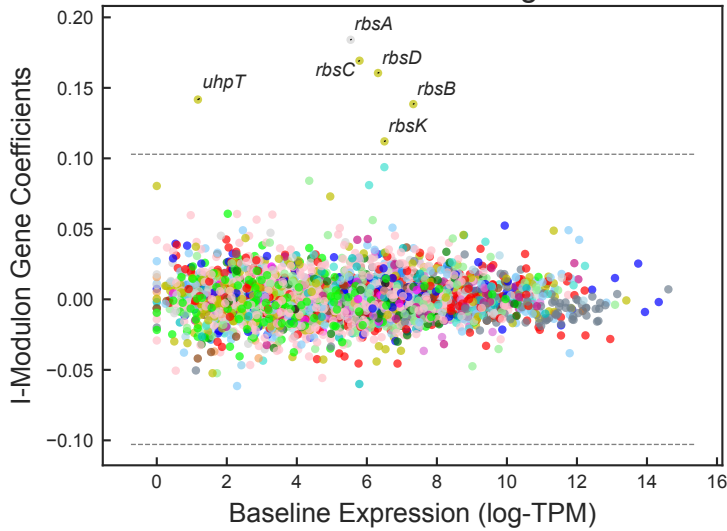

## COG Categories

- Carbohydrate transport and metabolism (5): *rbsB*, *rbsC*, *rbsD*, *rbsK*, *uhpT*
- Inorganic ion transport and metabolism (1): *rbsA*

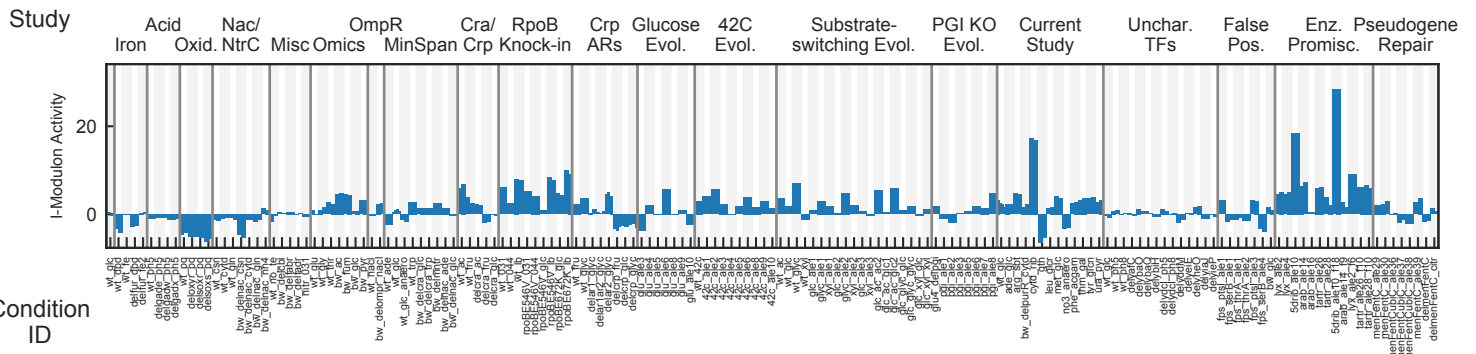

Condition ID

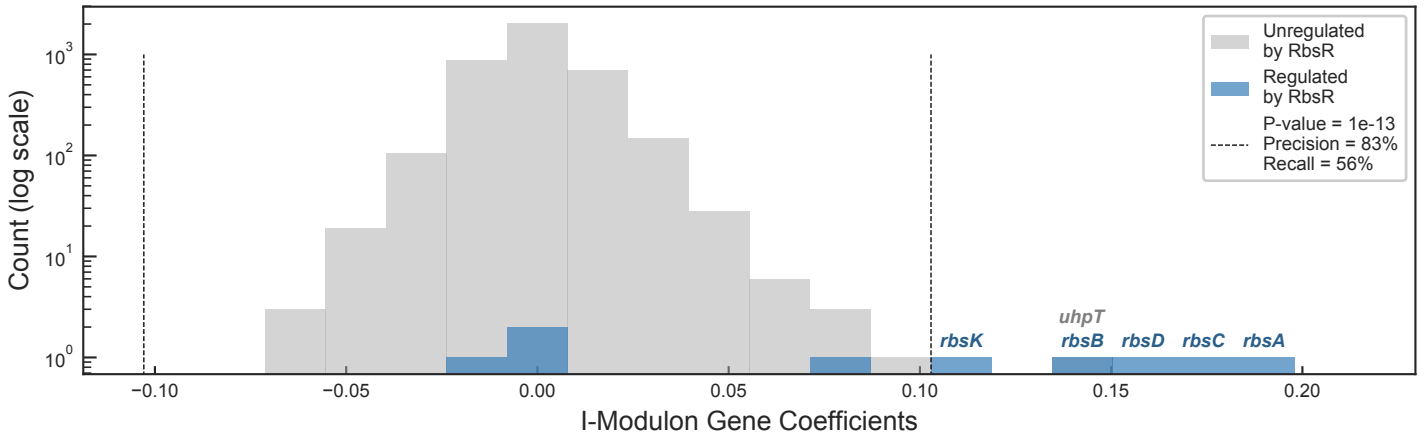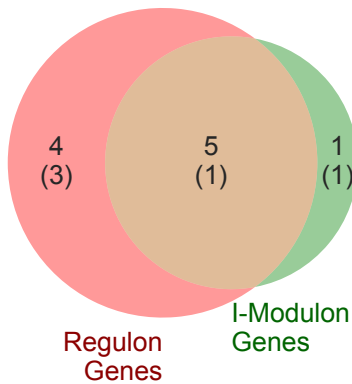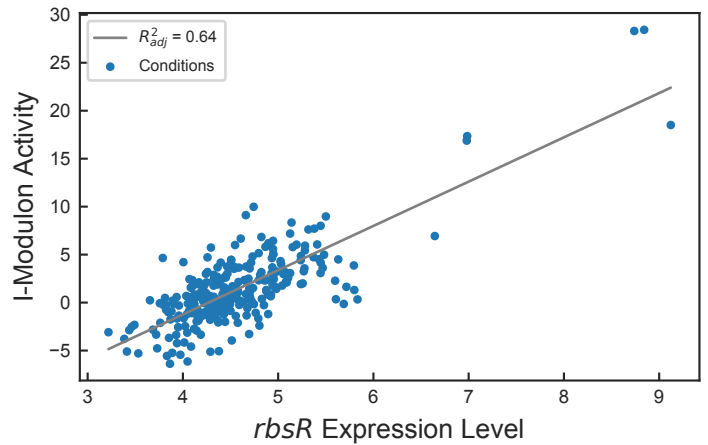

# RcsAB I-Modulon

Regulated by: RcsAB

Biological Function: Colanic acid capsule formation

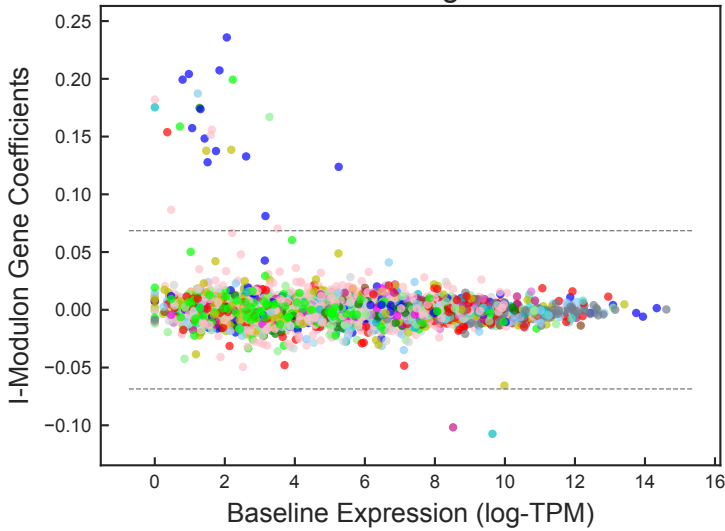

## COG Categories

- Cell wall/membrane/envelope biogenesis (12): *gmd*, *ugd*, *wcaA*, *wcaC*, *wcaE*, *wcaG*, *wcaI*, *wcaJ*, *wcaK*, *wcaL*, *wza*, *wzx*
- Carbohydrate transport and metabolism (2): *cpsB*, *cpsG*
- Signal transduction mechanisms (2): *crp*, *wzb*
- Amino acid transport and metabolism (1): *wcaB*
- Cell cycle control, cell division, chromosome partitioning (1): *wzc*
- Other (10): *lon*, *wcaH*, *rcaA*, *wcaF*, *yiaB*, *yjbF*, *yjbG*, *yjbH*, *wcaD*, *yjbE*

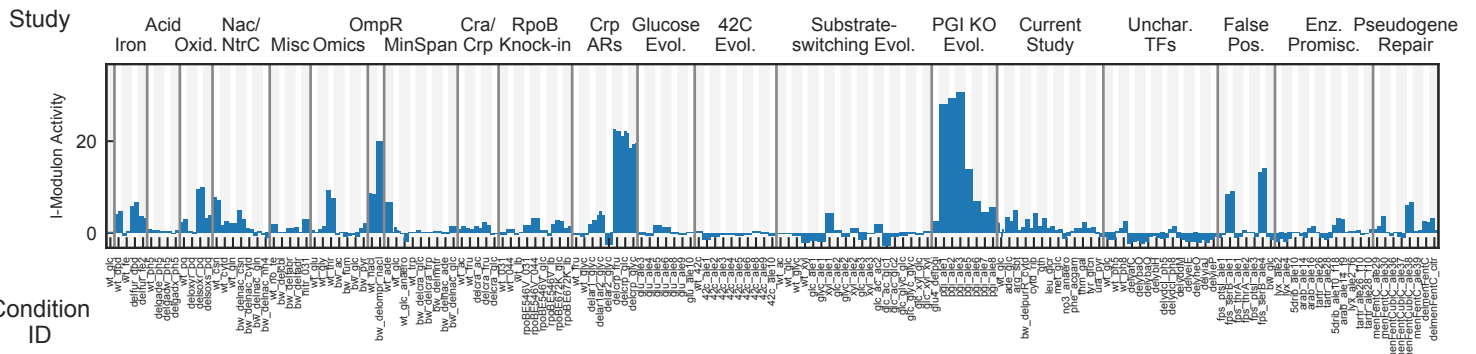

Condition ID

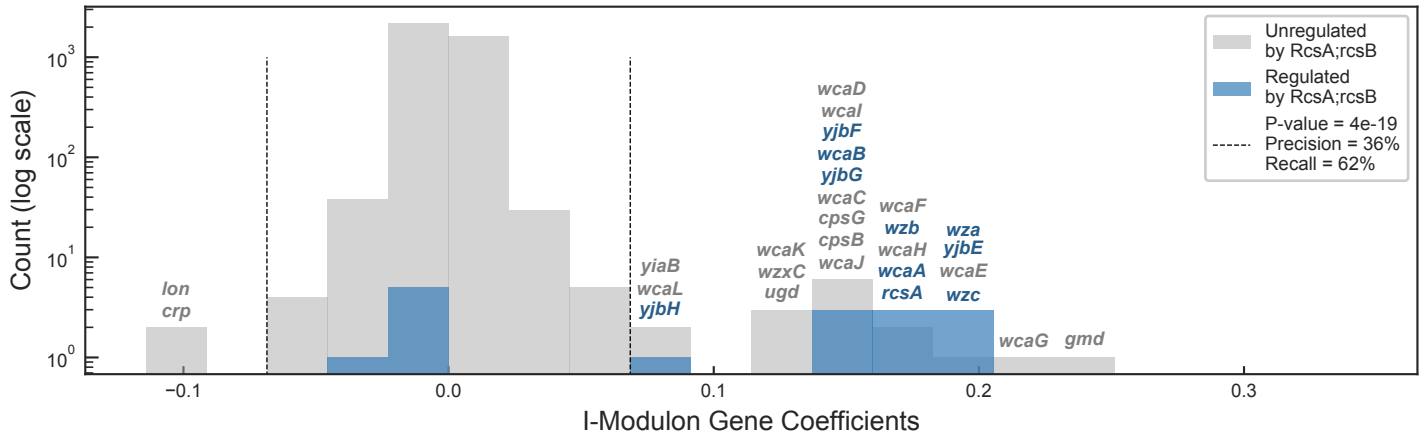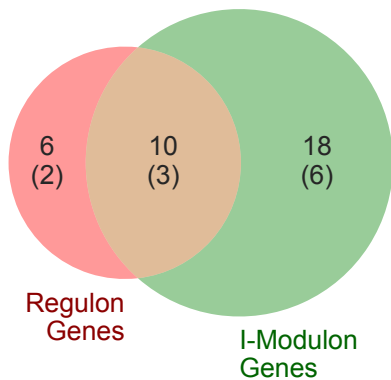

# RpoH I-Modulon

Regulated by: RpoH

Biological Function: Heat shock response

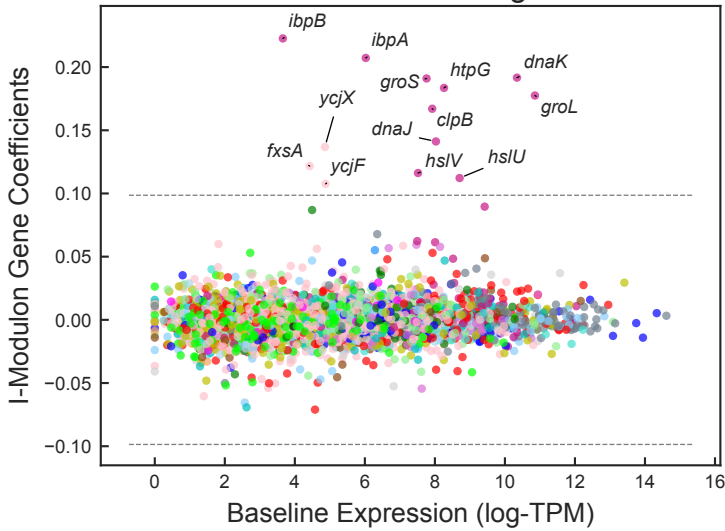

## COG Categories

- Posttranslational modification, protein turnover, chaperones (10): *clpB*, *dnaJ*, *dnaK*, *groL*, *groS*, *hslU*, *hslV*, *htpG*, *ibpA*, *ibpB*
- Function unknown (3): *fxsA*, *ycjF*, *ycjX*

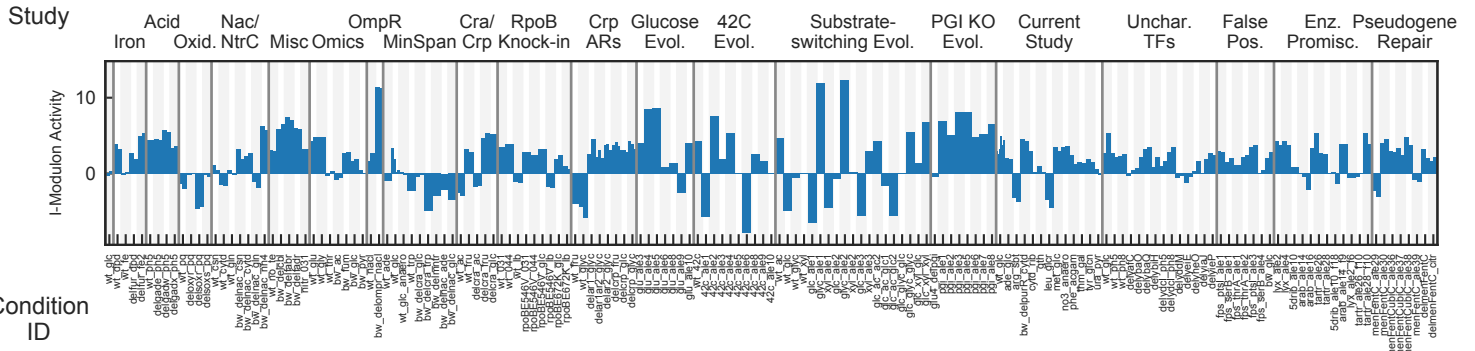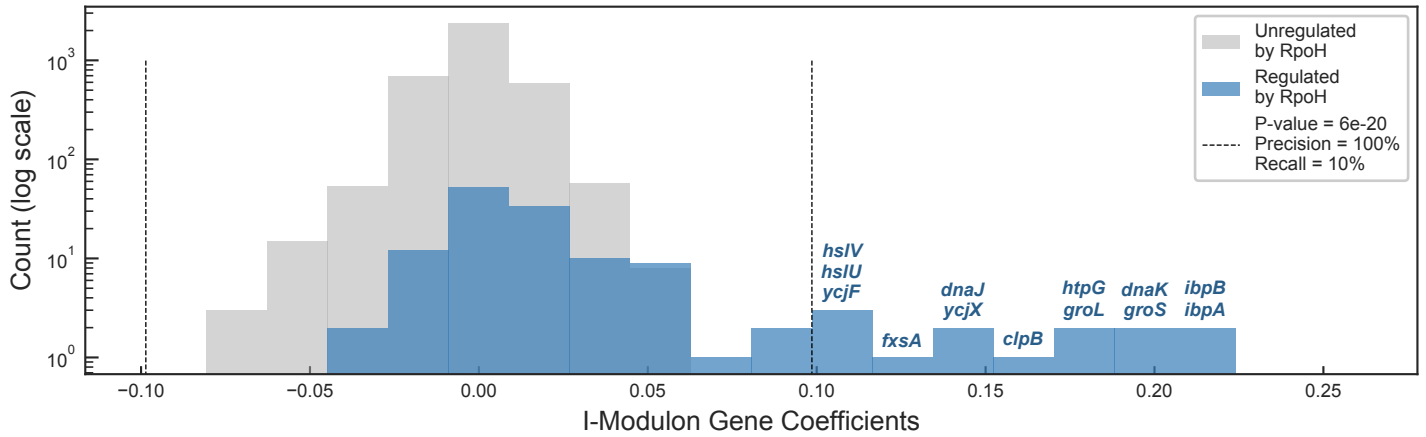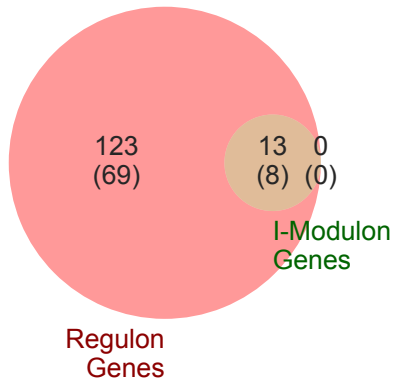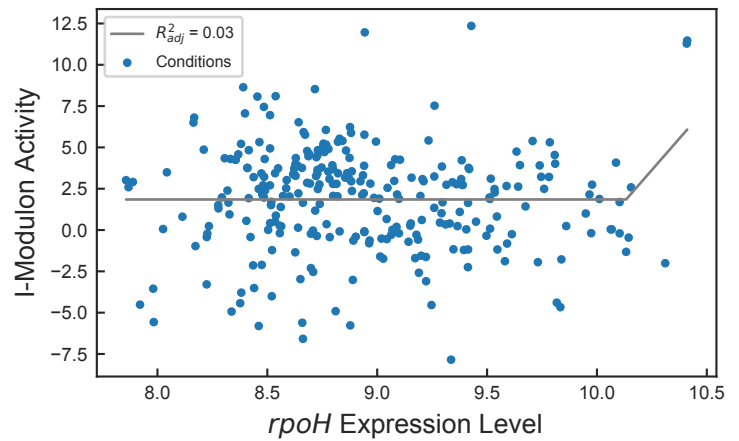

# RpoS I-Modulon

Regulated by: RpoS

Biological Function: General stress response

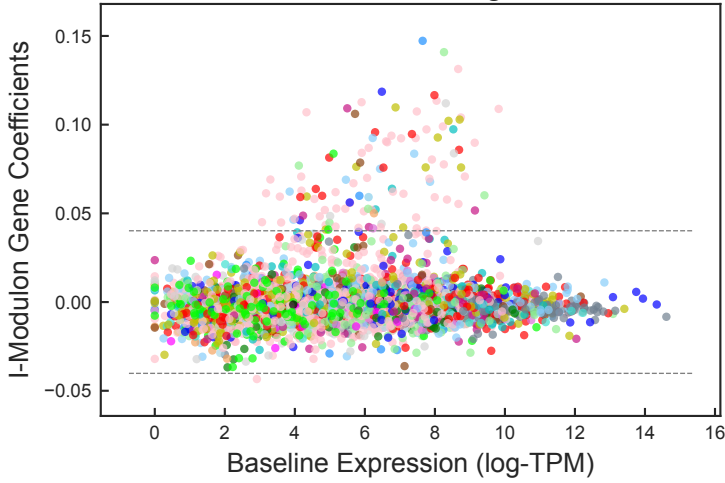

## COG Categories

- Carbohydrate transport and metabolism (10): *amyA, fbaB, otsA, otsB, talA, tktB, treA, ydcS, ylii, yniA*
- Amino acid transport and metabolism (9): *gabP, gabT, ggt, osmF, patA, poxB, yehW, yehX, yehY*
- Energy production and conversion (7): *adhP, ahr, aldB, gabD, lhgO, rclA, yahK*
- Transcription (5): *mcbR, mlrA, osmE, yhcO, yiaG*
- Inorganic ion transport and metabolism (4): *bfr, katE, sodC, yfdC*
- Other (72): *osmC, yfcG, yncG, yqjG, blc, ybiO, yhjG, gmr, ydaM, yeaG, clsB, yegS, csiD, ycaC, fic, yhjY, ubiC, cura, ecnB, elaB + 52*

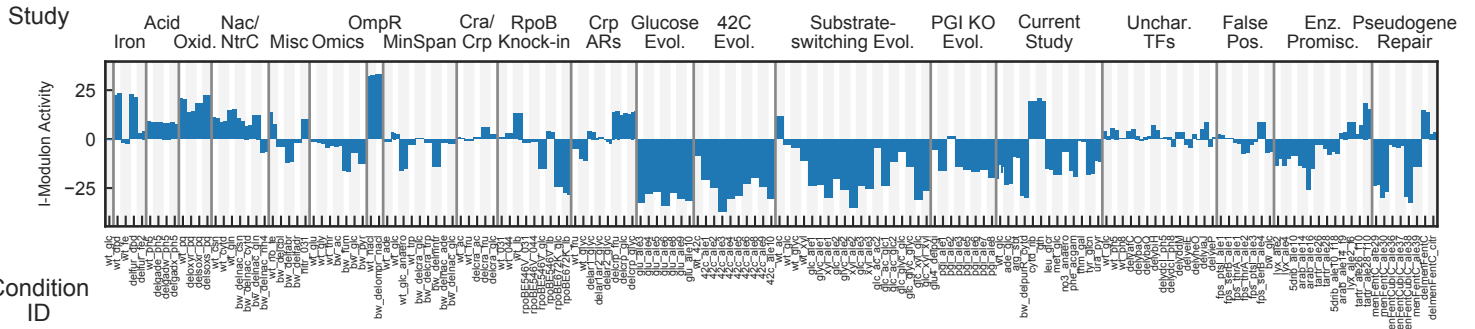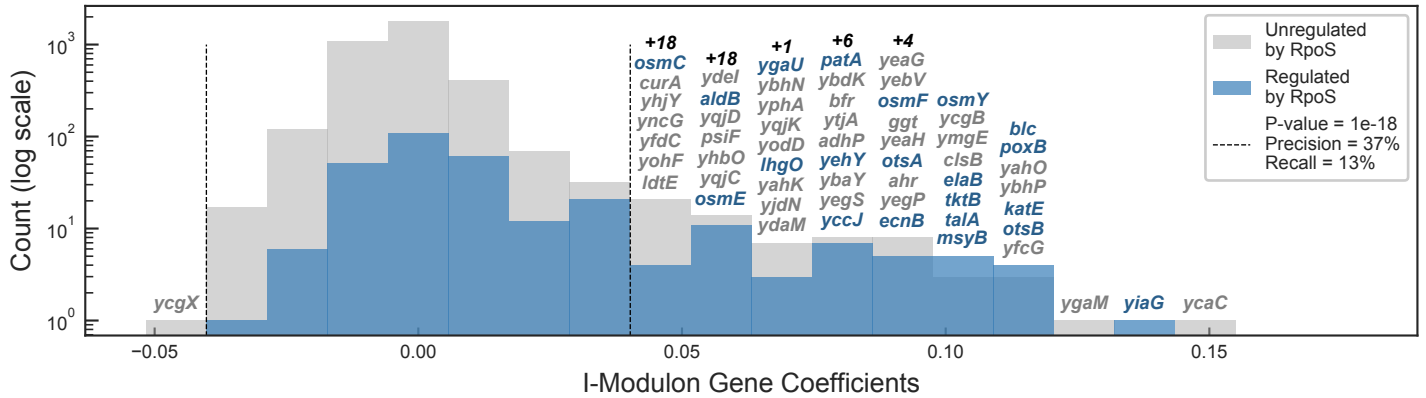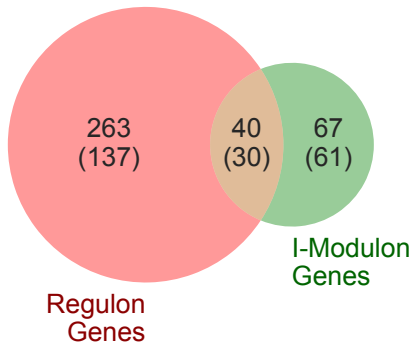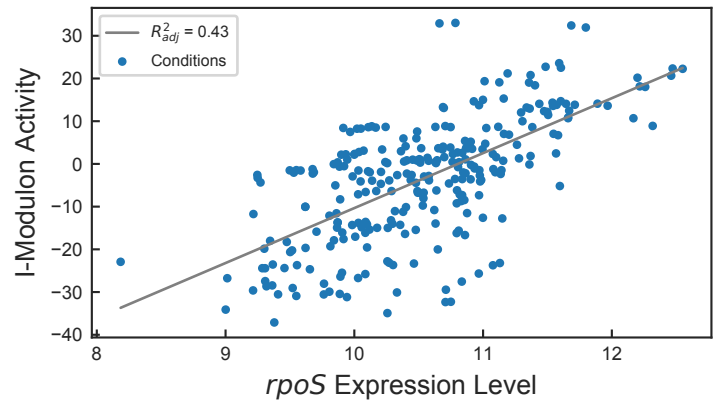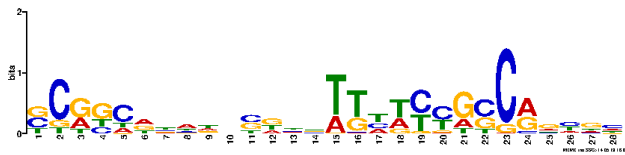

Motif E-value: 3.00e-05  
Operons with Upstream Motif: 98%

# SoxS I-Modulon

Regulated by: SoxS

Biological Function: Oxidative stress response

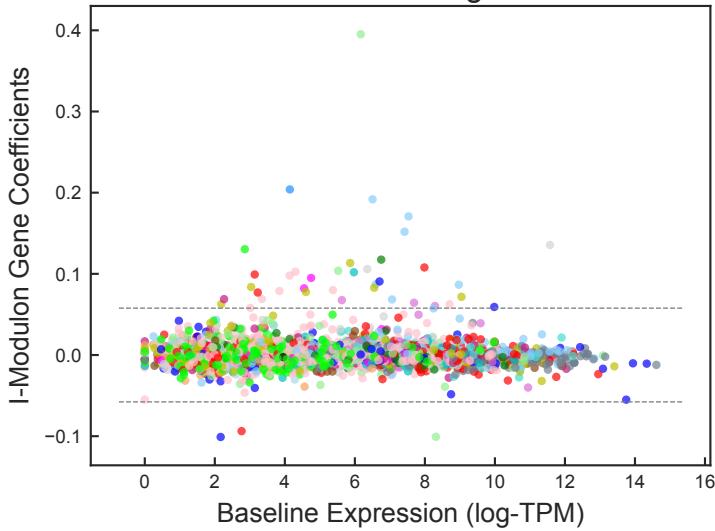

## COG Categories

- Carbohydrate transport and metabolism (6): *cpsG*, *mdtG*, *nepI*, *treF*, *yeil*, *zwf*
- Energy production and conversion (6): *fldA*, *fldB*, *fpr*, *fumC*, *nfsA*, *pfo*
- Amino acid transport and metabolism (4): *aegA*, *frvX*, *poxB*, *rspB*
- Cell wall/membrane/envelope biogenesis (3): *lpxC*, *mltC*, *rspA*
- Other (22): *lipA*, *ribA*, *rimK*, *oxyR*, *soxS*, *ybaO*, *mdlA*, *mdlB*, *sodA*, *yggX*, *yjwW*, *nfo*, *nhoA*, *inaA*, *ariR*, *yaiA*, *ybjC*, *ygfZ*, *yhcN*, *ymgA* + 2

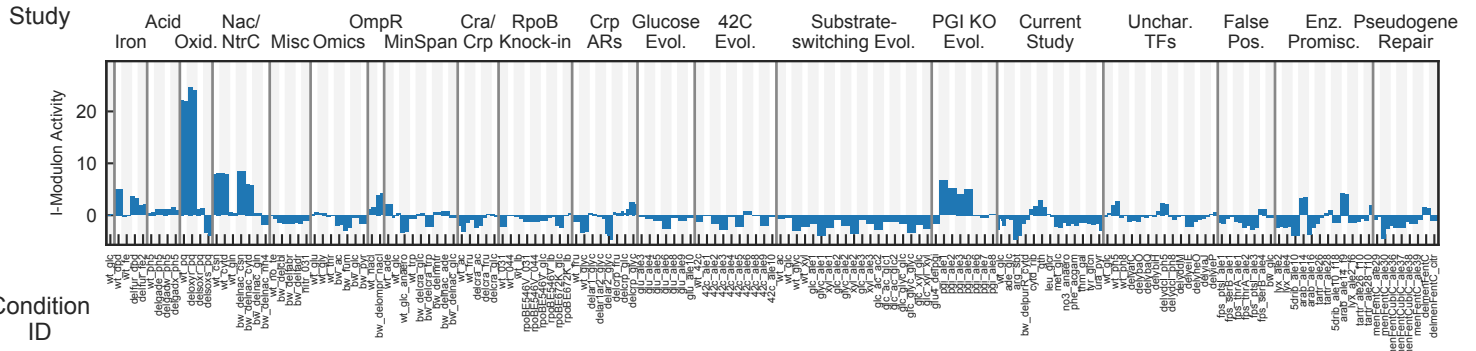

Condition ID

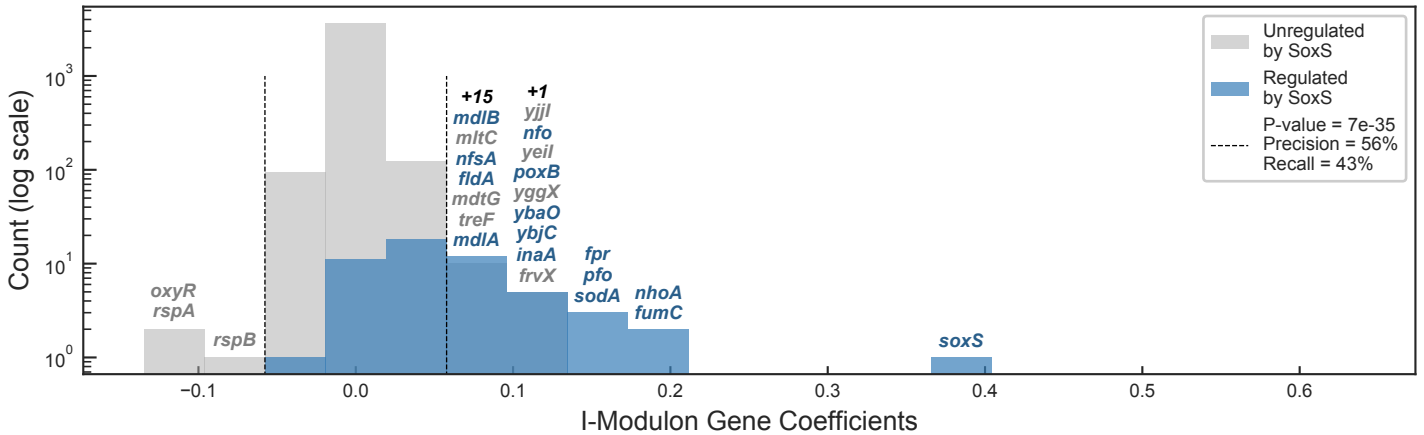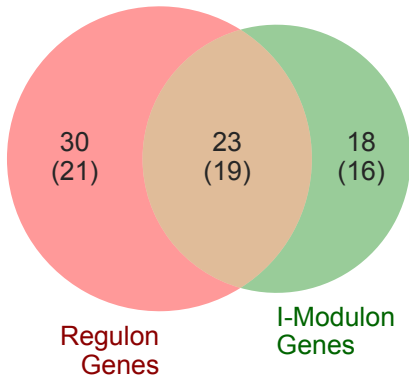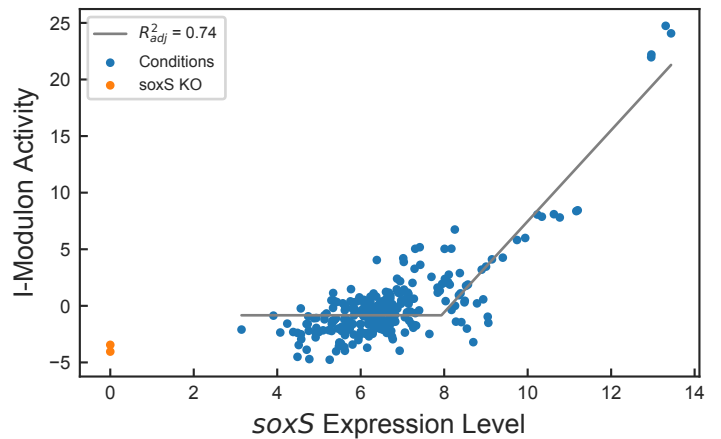

# SrIR + GutM I-Modulon

Regulated by: SrIR and GutM  
Biological Function: Sorbitol catabolism

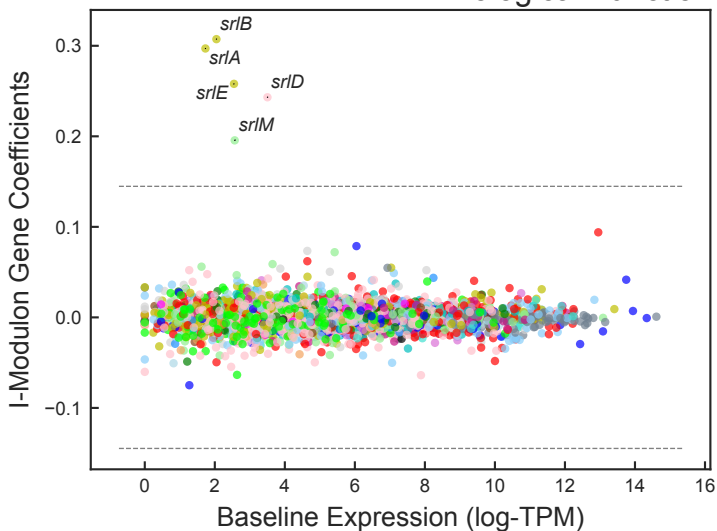

## COG Categories

- Carbohydrate transport and metabolism (3): *srIA*, *srIB*, *srIE*
- Transcription (1): *srIM*
- Function unknown (1): *srID*

Study: Acid Iron, Nac/Oxid. NtrC, OmpR Misc Omics, Cra/MinSpan, RpoB Crp Knock-in, Crp ARs, Glucose Evol., 42C Evol., Substrate-switching Evol., PGI KO Evol., Current Study, Unchar. TFs, False Pos., Enz. Promisc., Pseudogene Repair

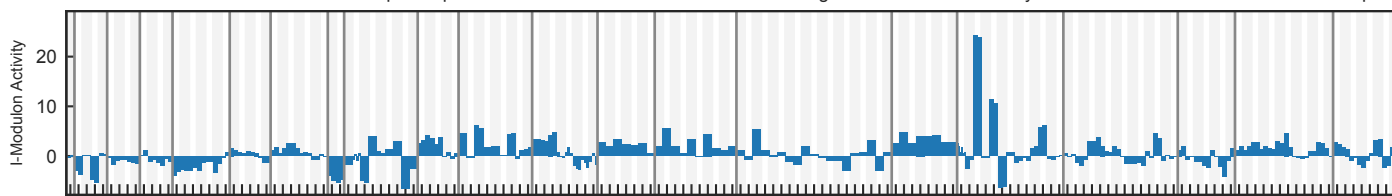

Condition ID

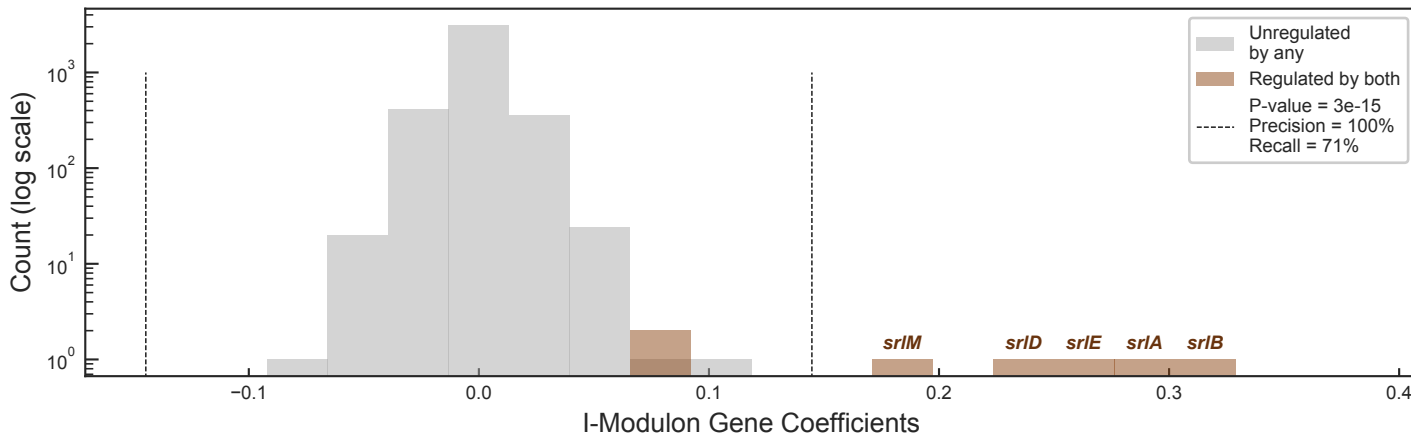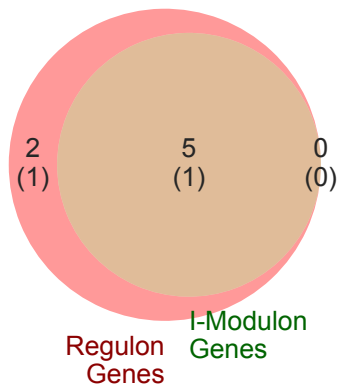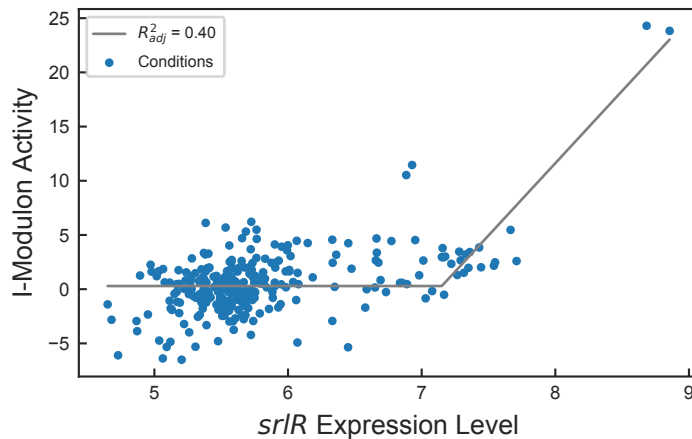

# Thiamine I-Modulon

Regulated by: Thiamine

Biological Function: Thiamine biosynthesis

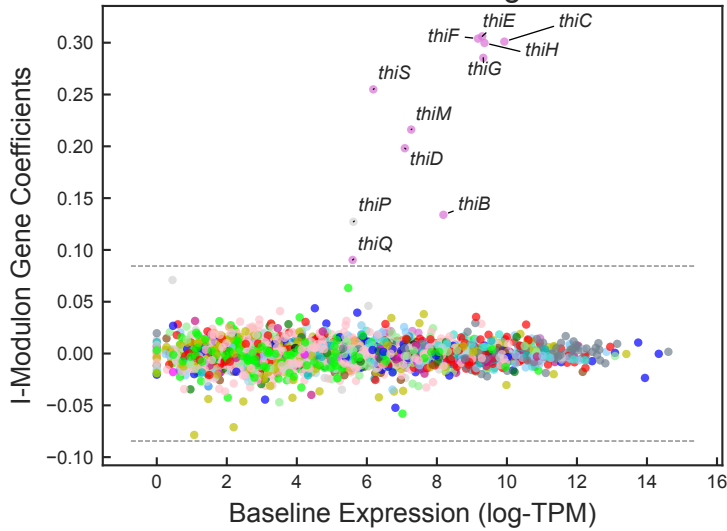

## COG Categories

- Coenzyme transport and metabolism (10): *thiB*, *thiC*, *thiD*, *thiE*, *thiF*, *thiG*, *thiH*, *thiM*, *thiQ*, *thiS*
- Inorganic ion transport and metabolism (1): *thiP*

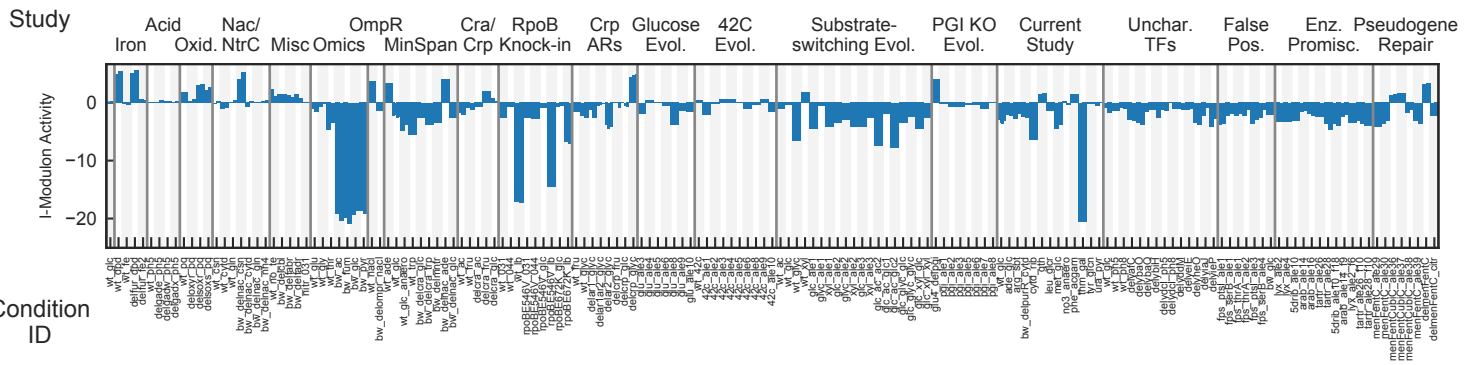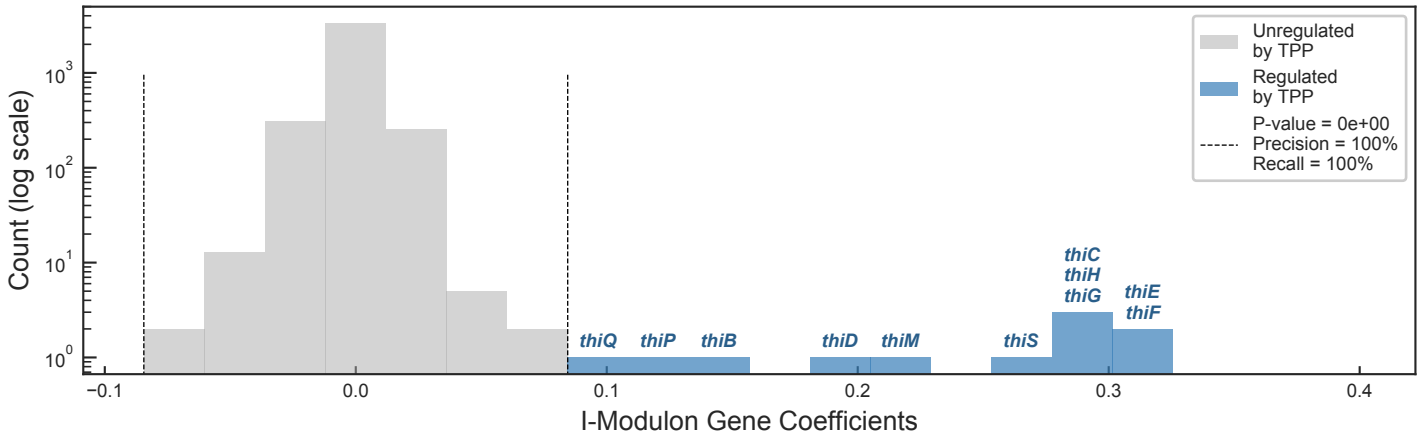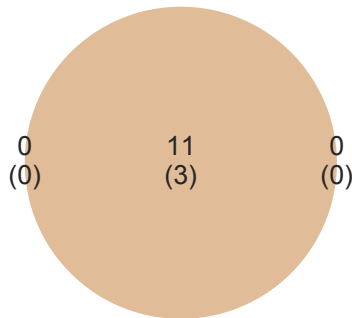

Regulon I-Modulon  
Genes Genes

# Tryptophan I-Modulon

Regulated by: TrpR or trp-tRNA attenuation or Tryptophan attenuation

Biological Function: Tryptophan Biosynthesis

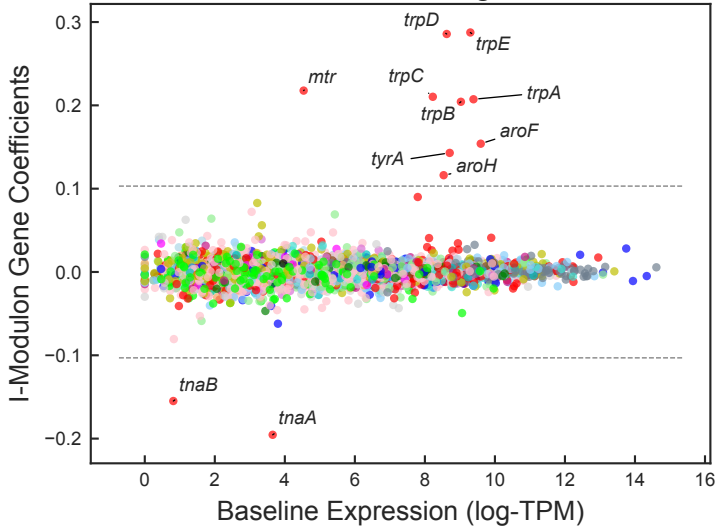

## COG Categories

● Amino acid transport and metabolism (11): *aroF*, *aroH*, *mtr*, *tnaA*, *tnaB*, *trpA*, *trpB*, *trpC*, *trpD*, *trpE*, *tyrA*

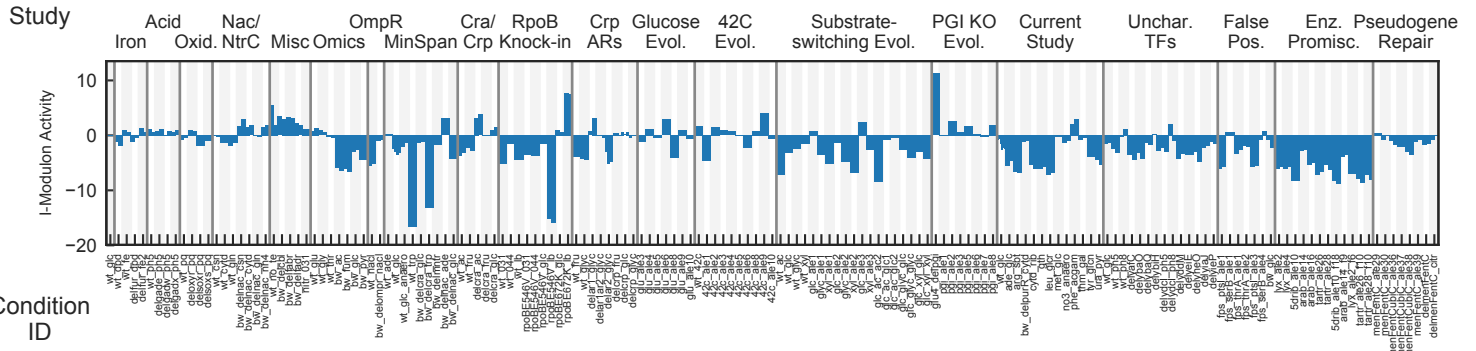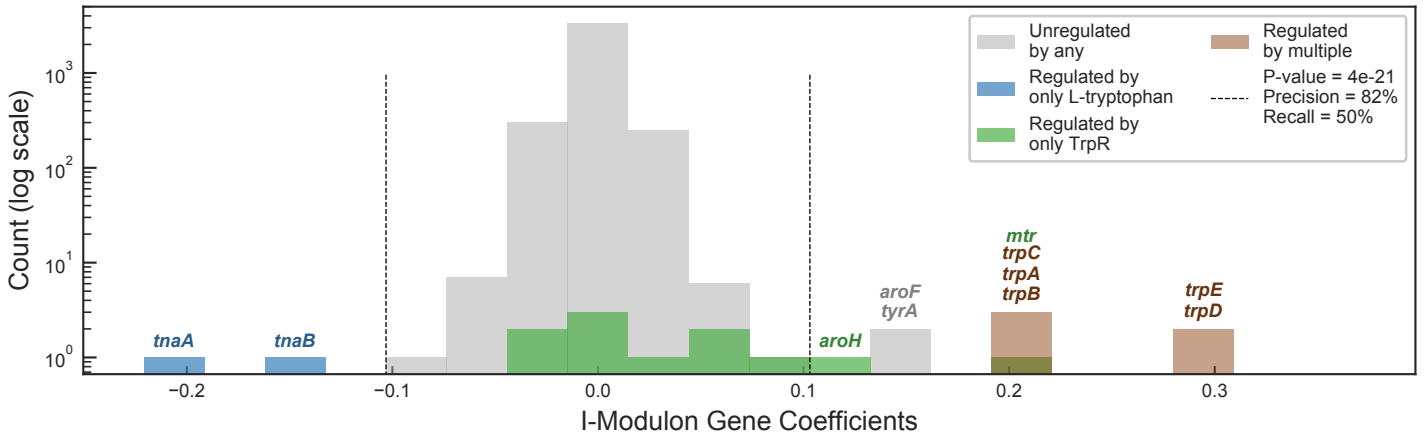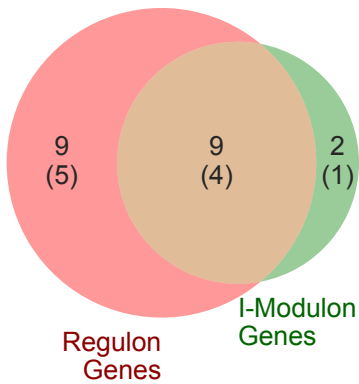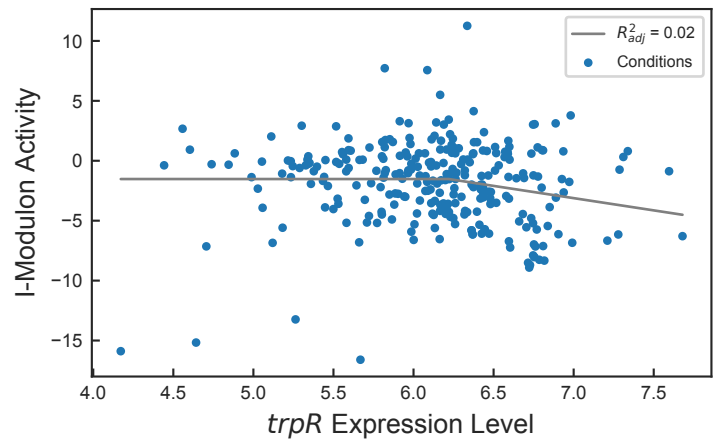



# XylR I-Modulon

Regulated by: XylR

Biological Function: Xylose catabolism

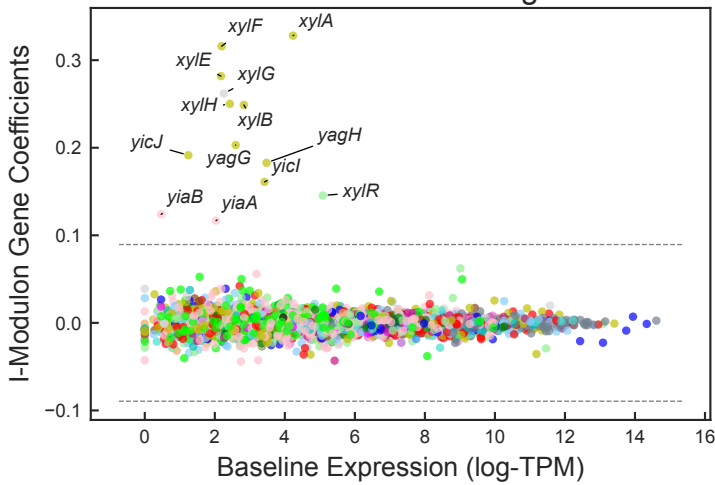

## COG Categories

- Carbohydrate transport and metabolism (9): *xylA*, *xylB*, *xylE*, *xylF*, *xylH*, *yagG*, *yagH*, *yicl*, *yicj*
- Inorganic ion transport and metabolism (1): *xylG*
- Transcription (1): *xylR*
- Function unknown (2): *yiaA*, *yiaB*

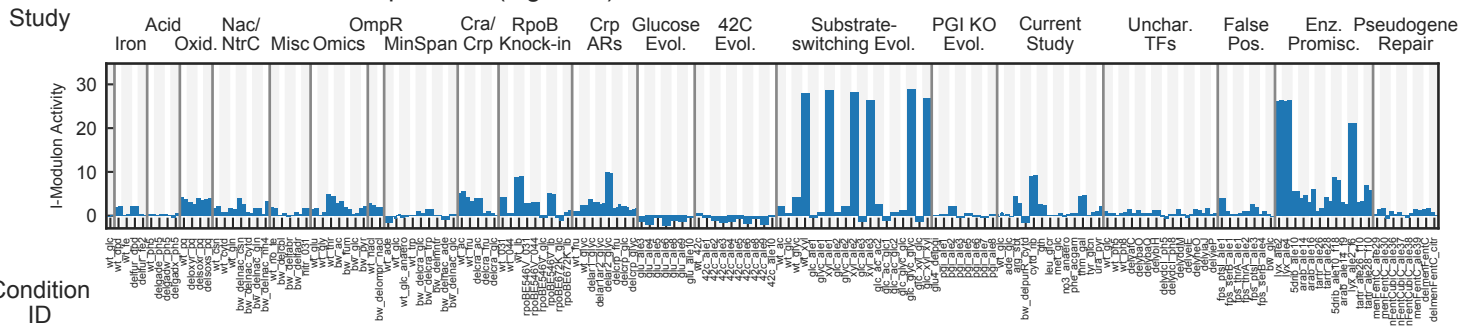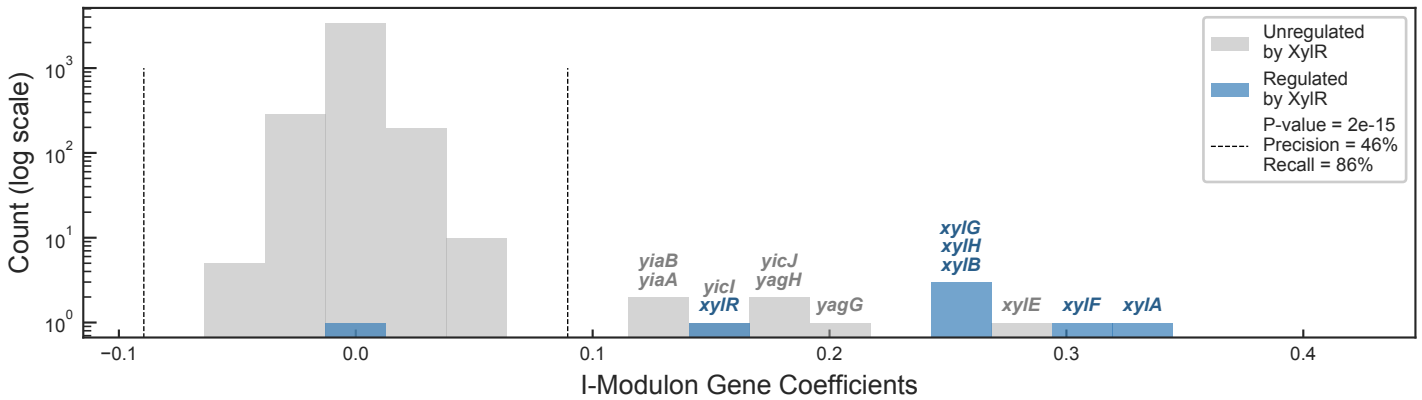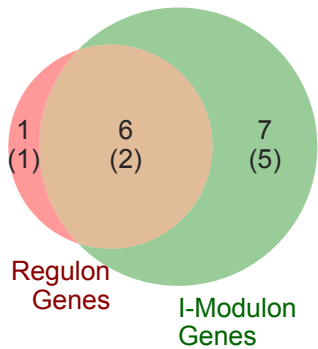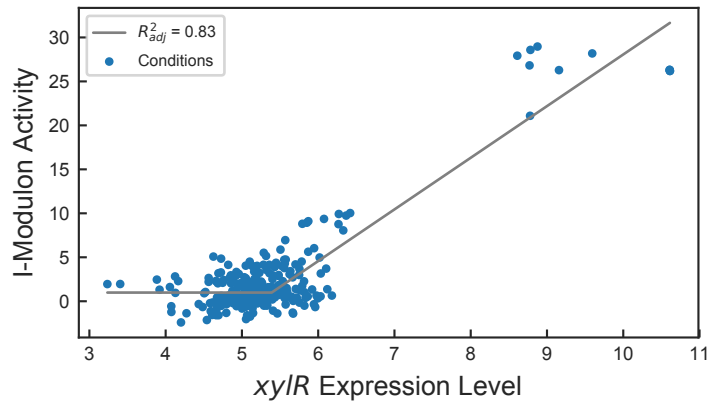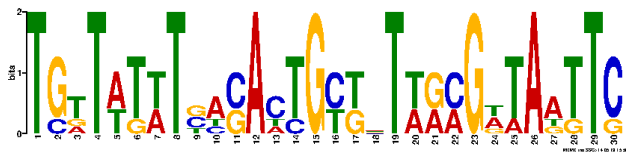

Motif E-value: 3.70e-04  
Operons with Upstream Motif: 71%

# YgbI I-Modulon

Regulated by: YgbI

Biological Function: Unknown Function

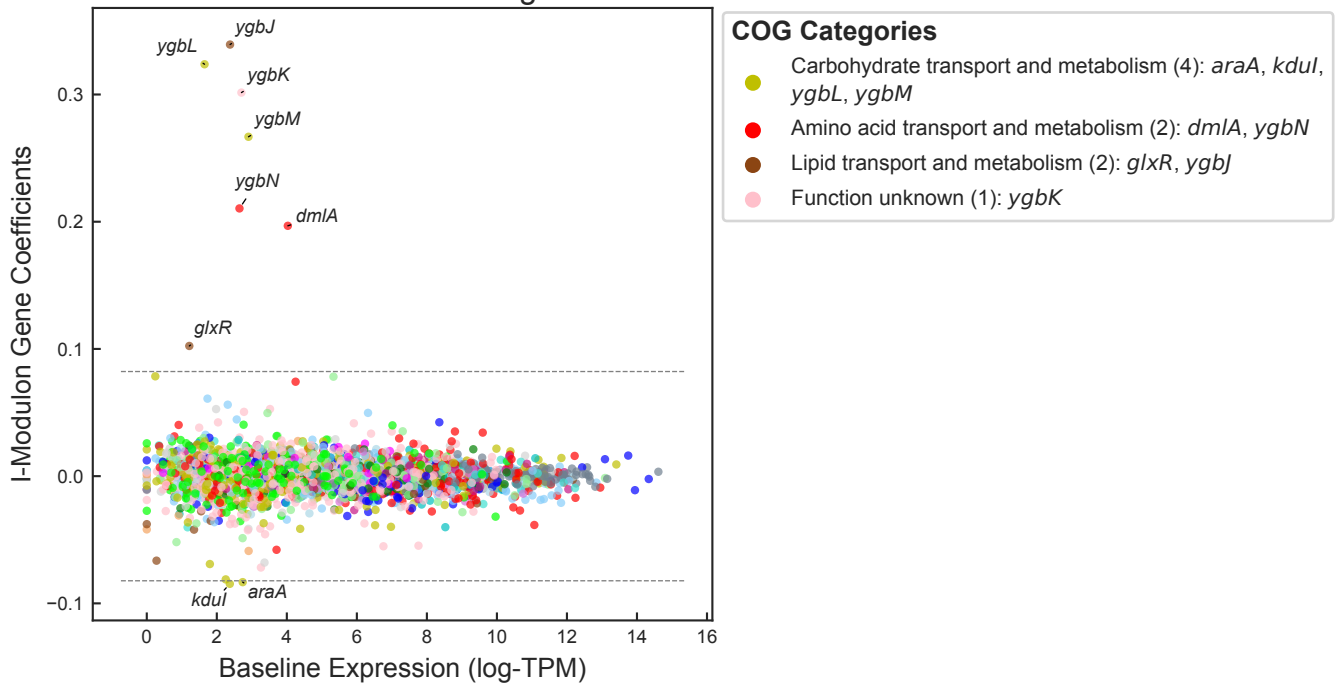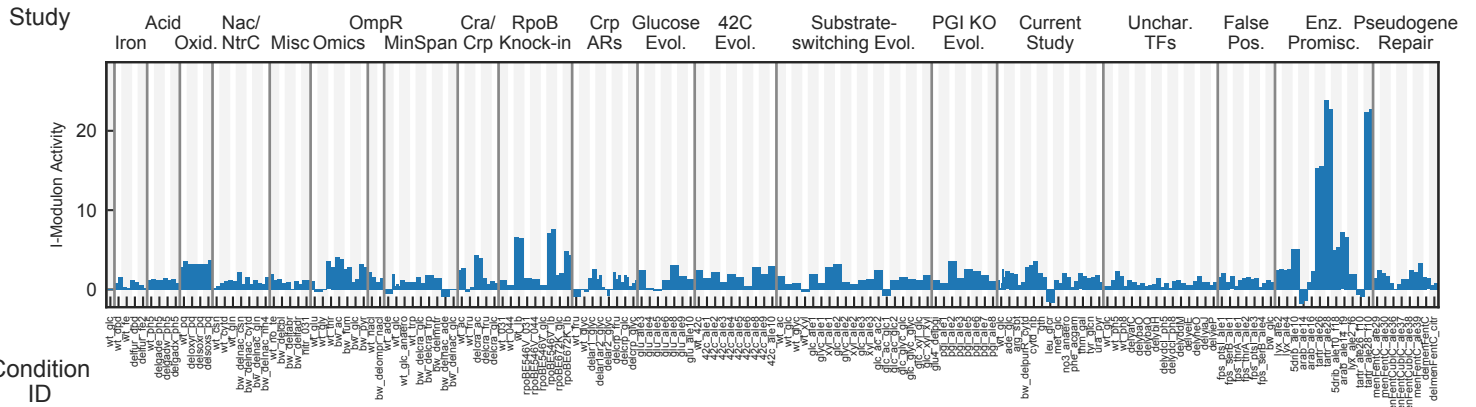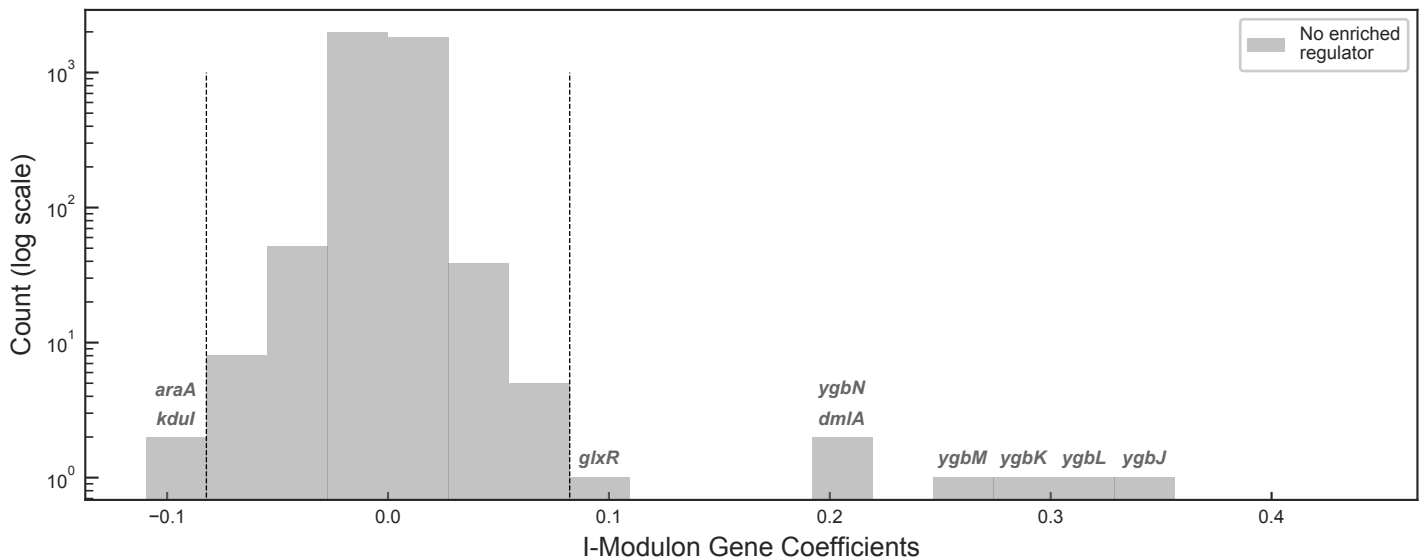

# YiaJ I-Modulon

Regulated by: YiaJ

Biological Function: Ascorbate utilization

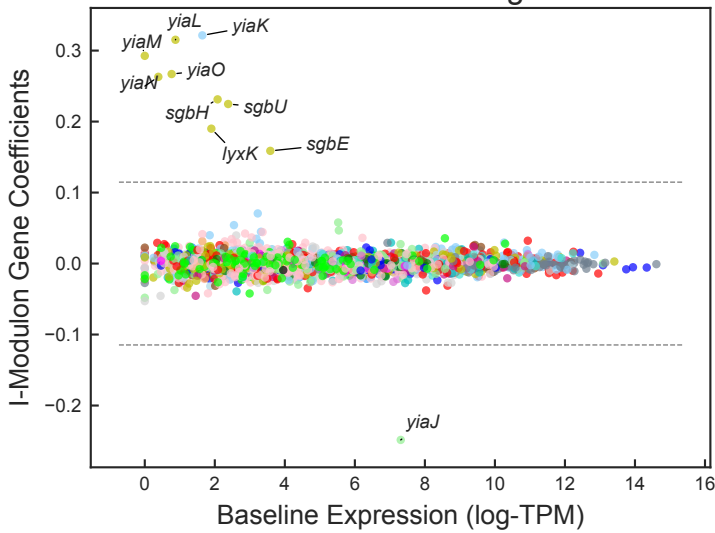

## COG Categories

- Carbohydrate transport and metabolism (8): *lyxK*, *sgbE*, *sgbH*, *sgbU*, *yiaL*, *yiaM*, *yiaN*, *yiaO*
- Energy production and conversion (1): *yiaK*
- Transcription (1): *yiaJ*

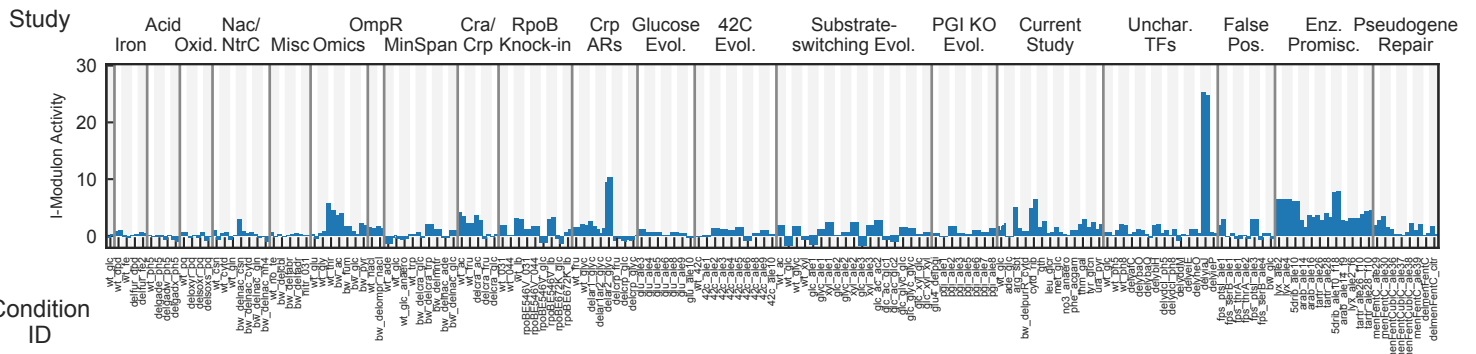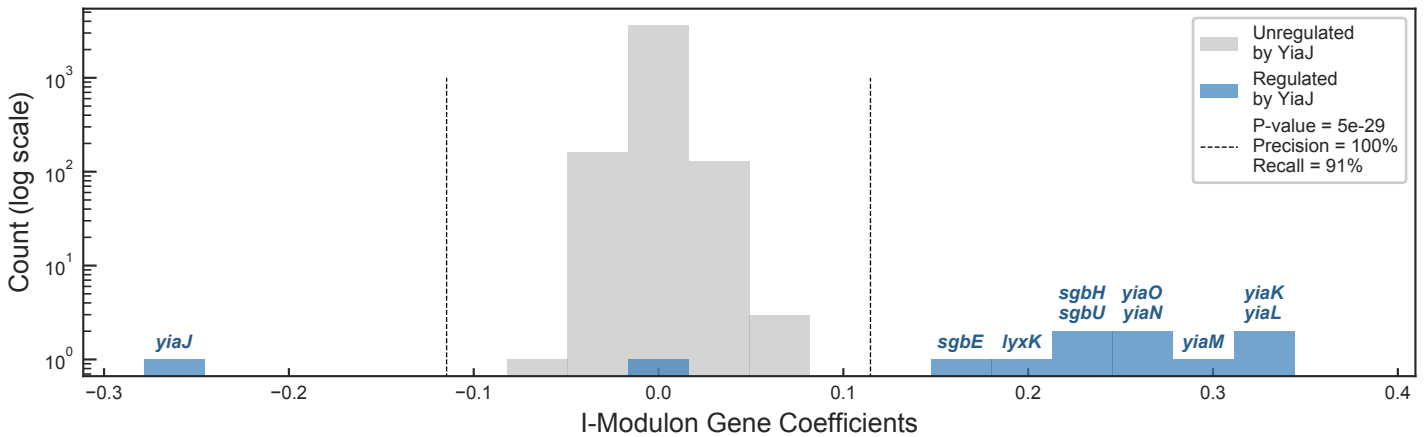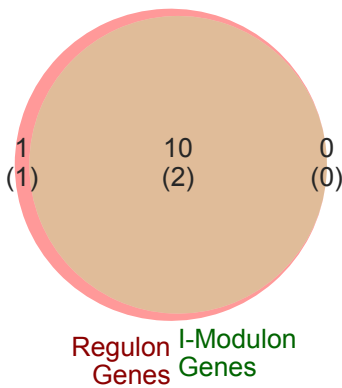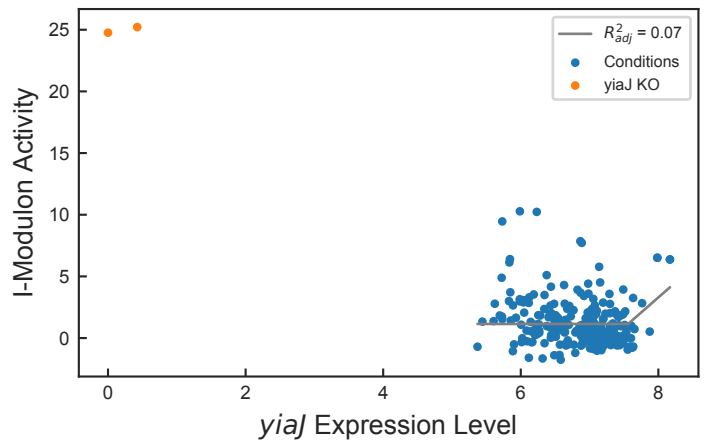

# YieP I-Modulon

Regulated by: YieP

Biological Function: Unknown

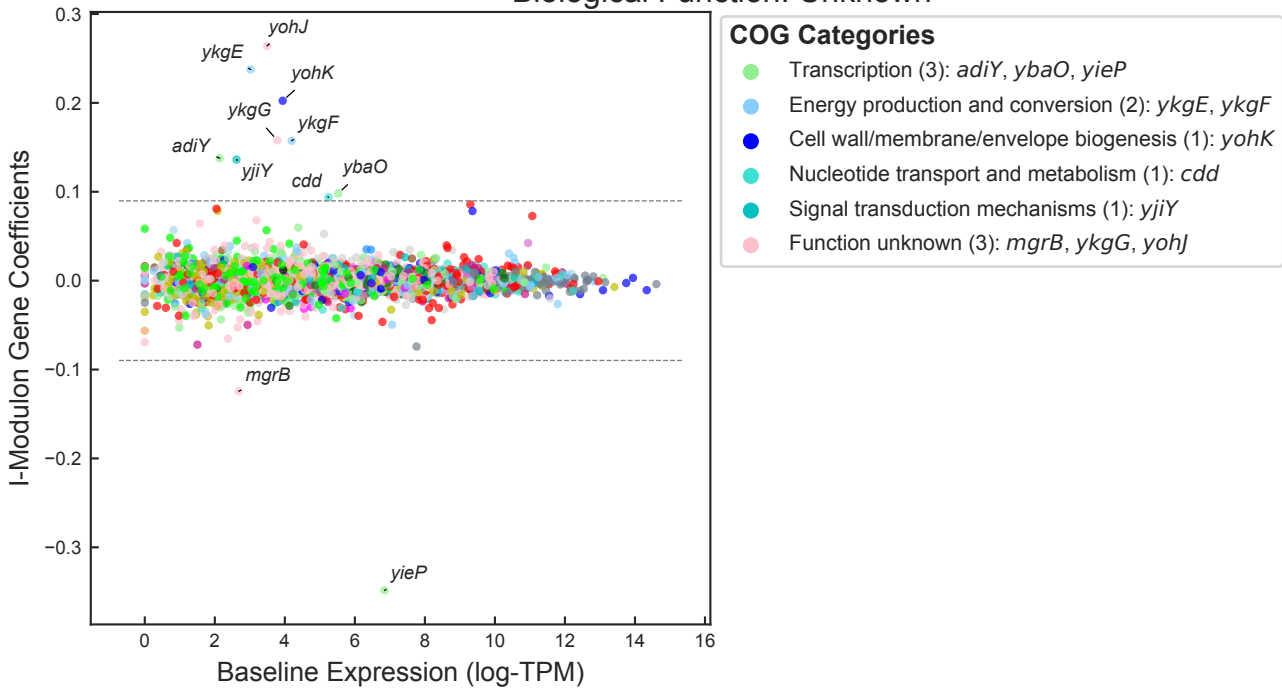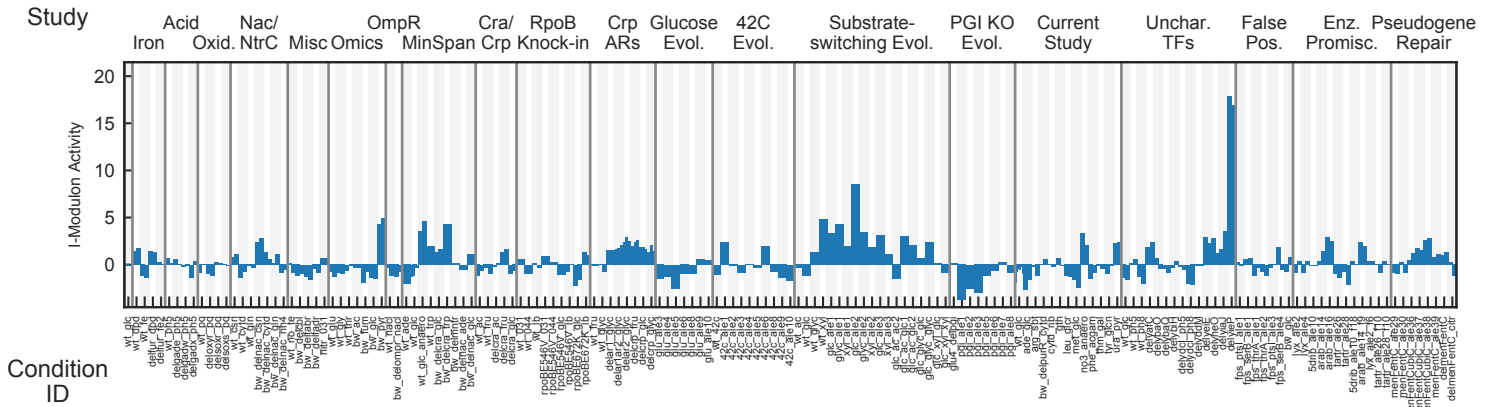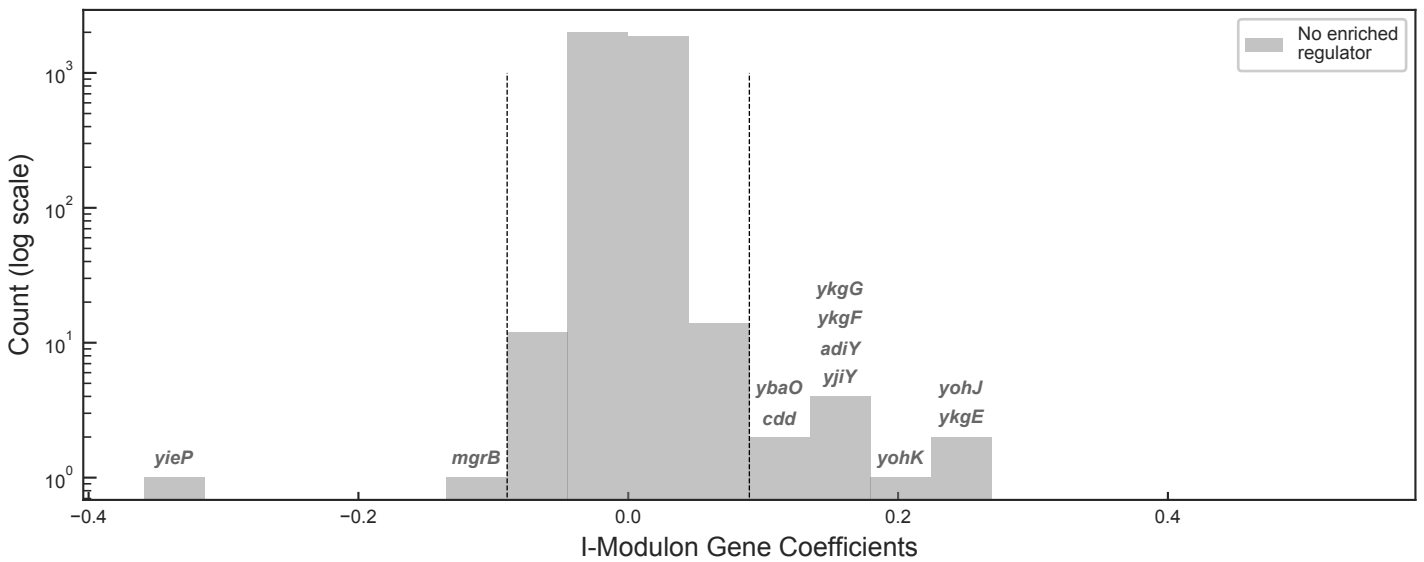

# YneJ I-Modulon

Regulated by: YneJ

Biological Function: Unknown Function

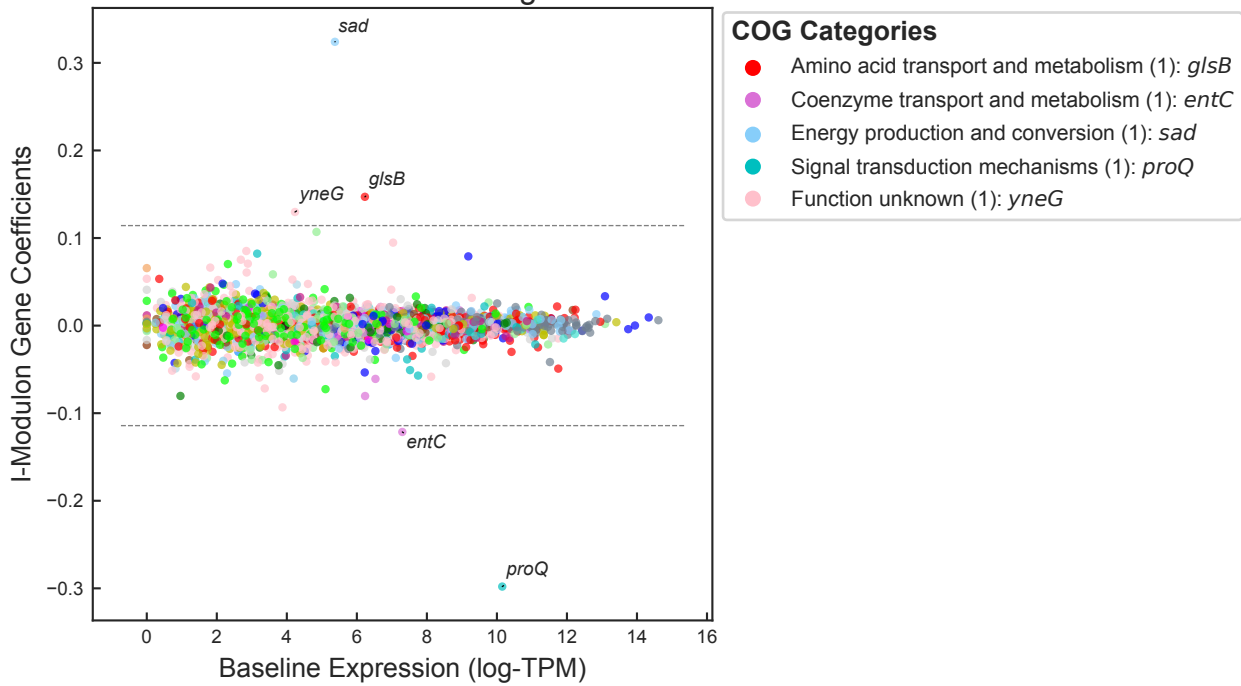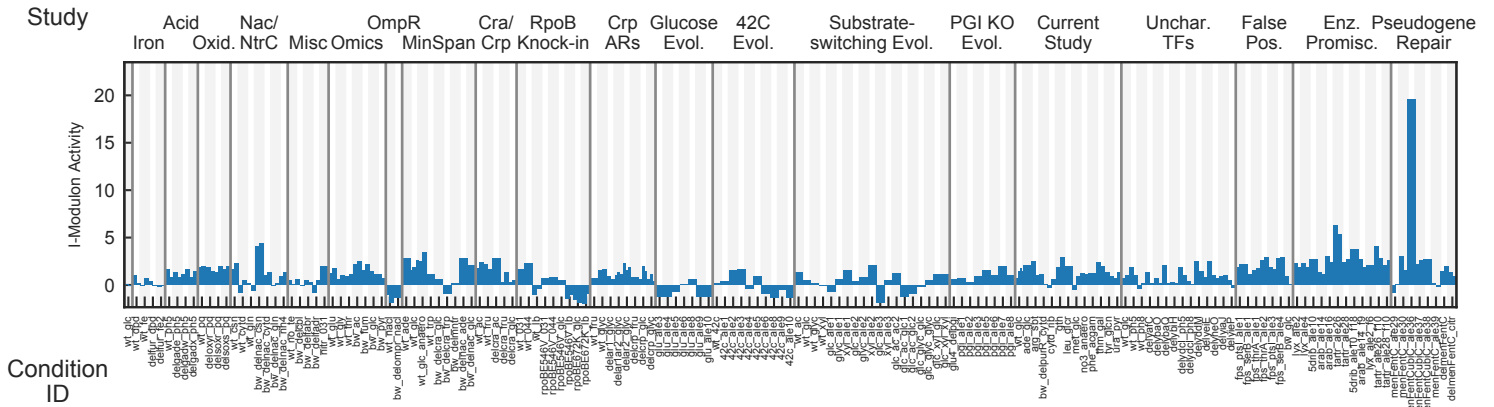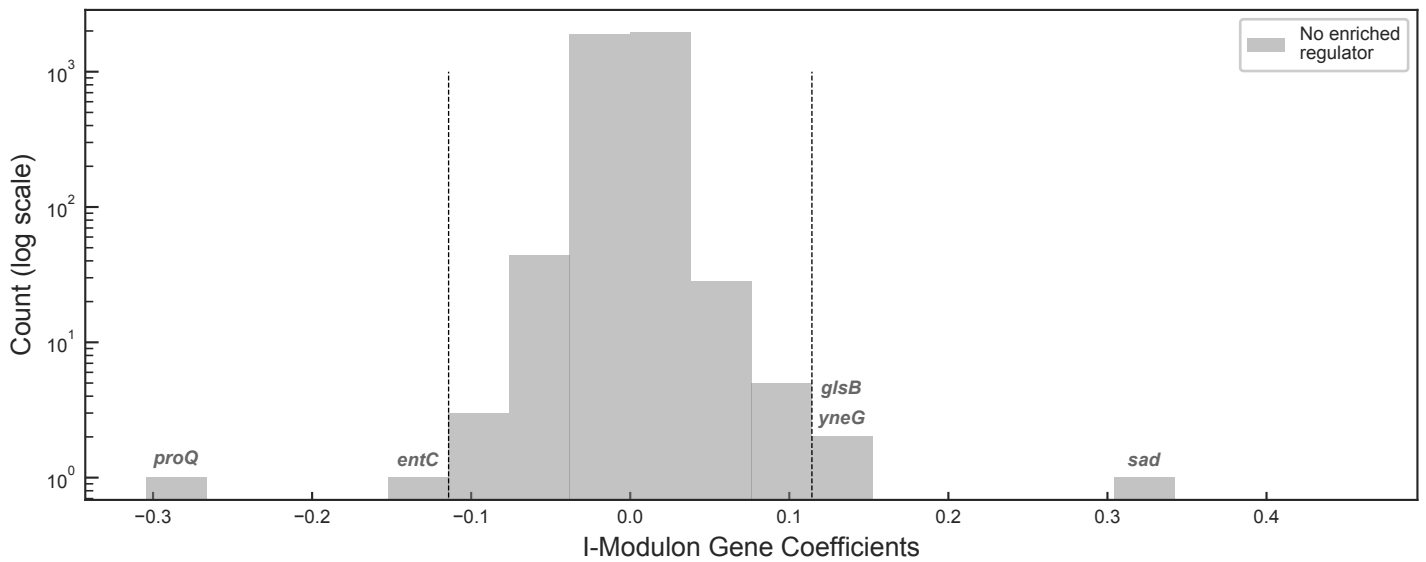

# Zinc I-Modulon

Regulated by: ZntR or Zur  
Biological Function: Zinc homeostasis

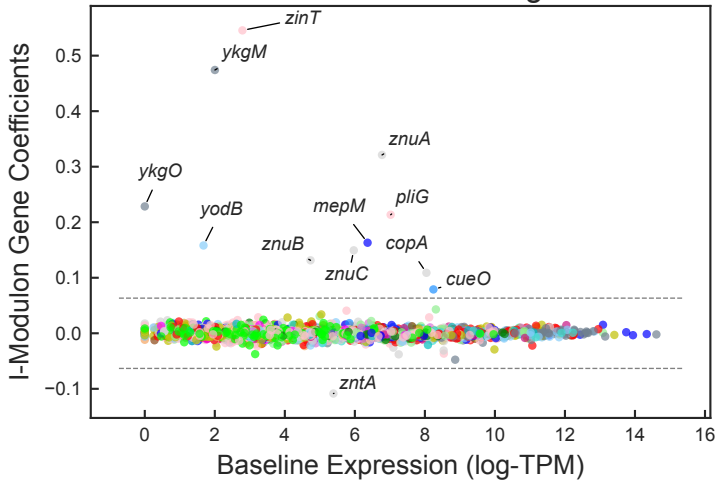

## COG Categories

- Inorganic ion transport and metabolism (5): *copA*, *zntA*, *znuA*, *znuB*, *znuC*
- Translation, ribosomal structure and biogenesis (2): *ykgM*, *ykgO*
- Cell wall/membrane/envelope biogenesis (1): *mepM*
- Energy production and conversion (1): *yodB*
- Secondary metabolites biosynthesis, transport and catabolism (1): *cueO*
- Function unknown (2): *pliG*, *zinT*

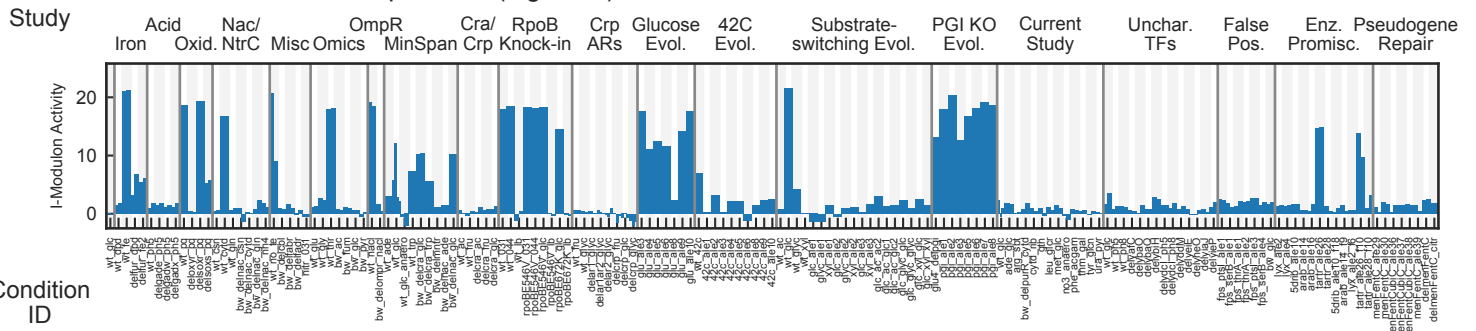

Condition ID

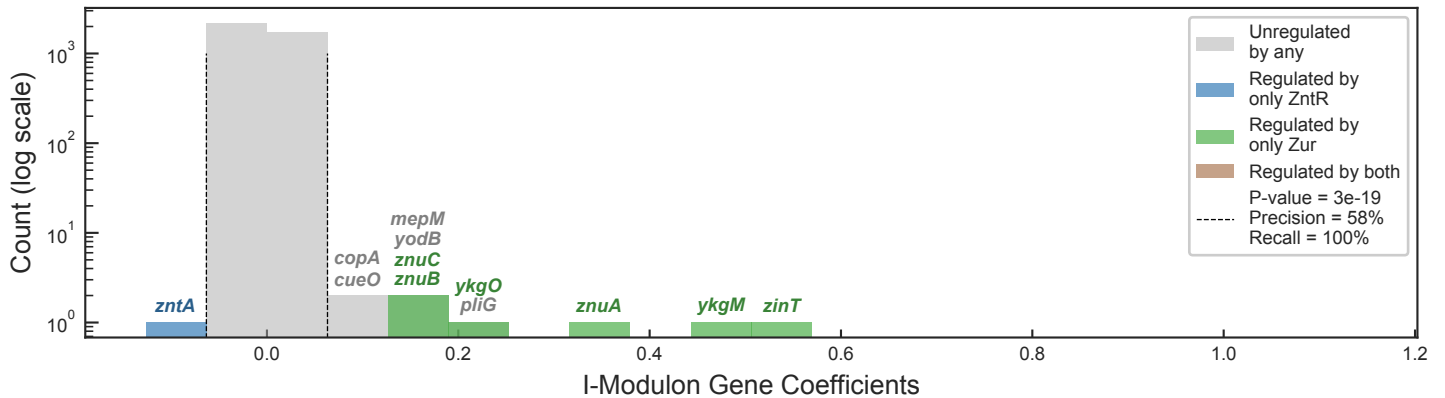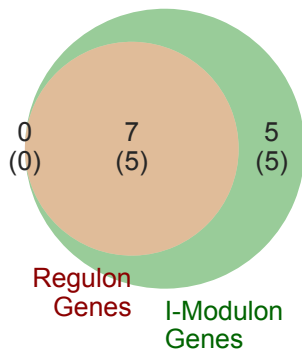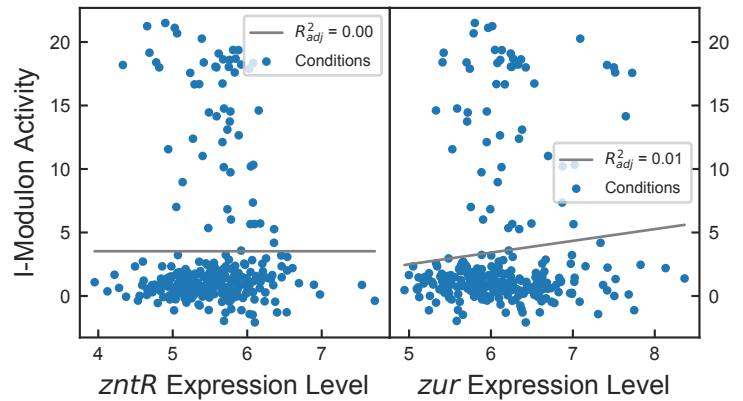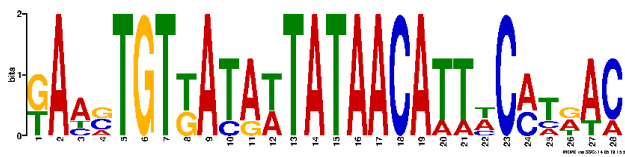

Motif E-value: 4.50e-06  
Operons with Upstream Motif: 50%

# crp – KO I-Modulon

Biological Function: Accounts for crp knock-out

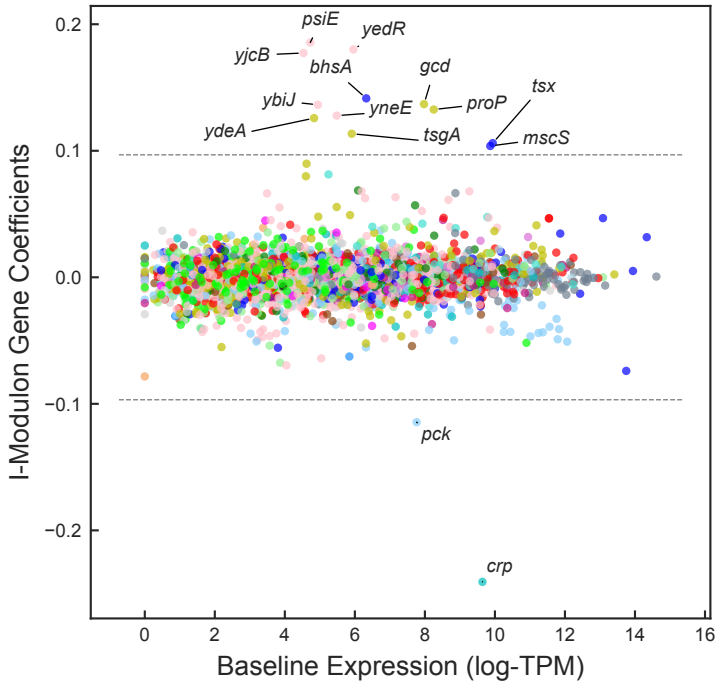

## COG Categories

- Carbohydrate transport and metabolism (4): *gcd*, *proP*, *tsgA*, *ydeA*
- Cell wall/membrane/envelope biogenesis (3): *bhsA*, *mscS*, *tsx*
- Energy production and conversion (1): *pck*
- Signal transduction mechanisms (1): *crp*
- Function unknown (5): *psiE*, *ybiJ*, *yedR*, *yjcB*, *yneE*

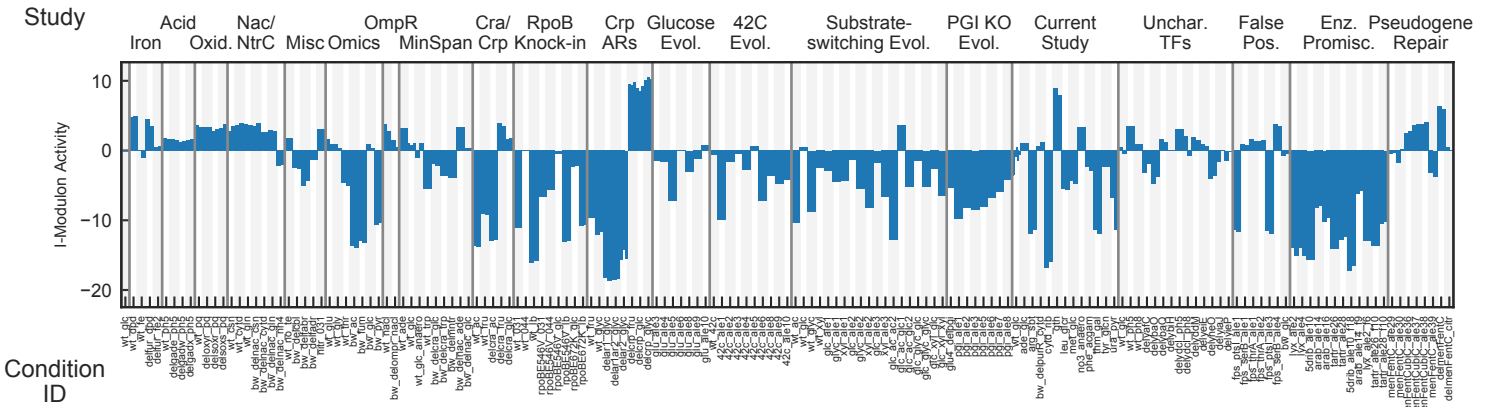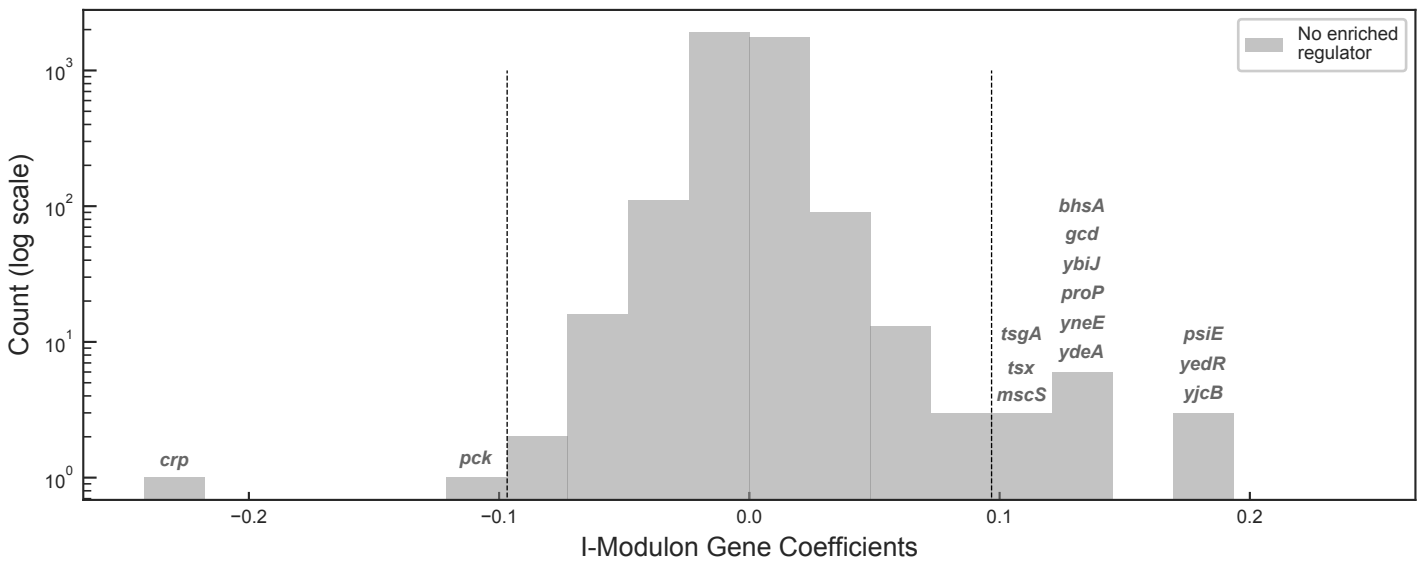

# curli I-Modulon

Biological Function: Curli assembly

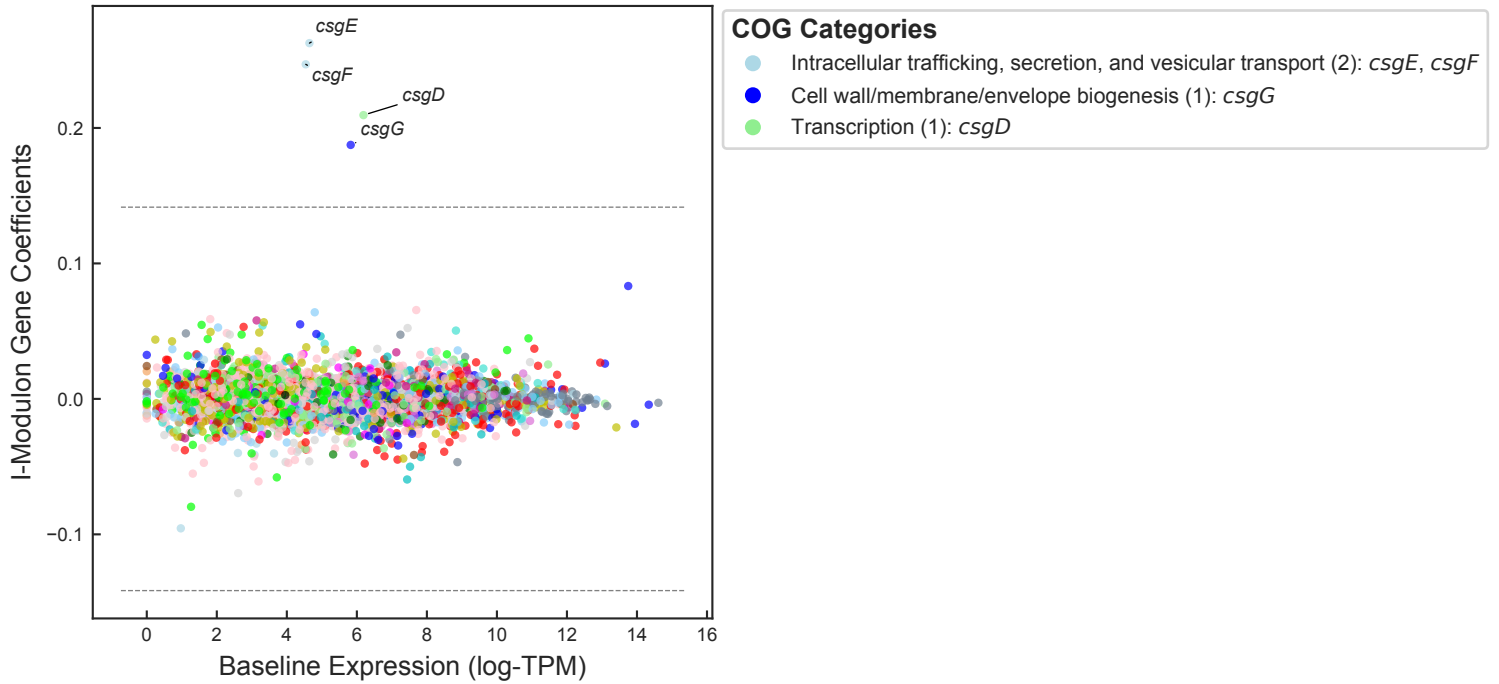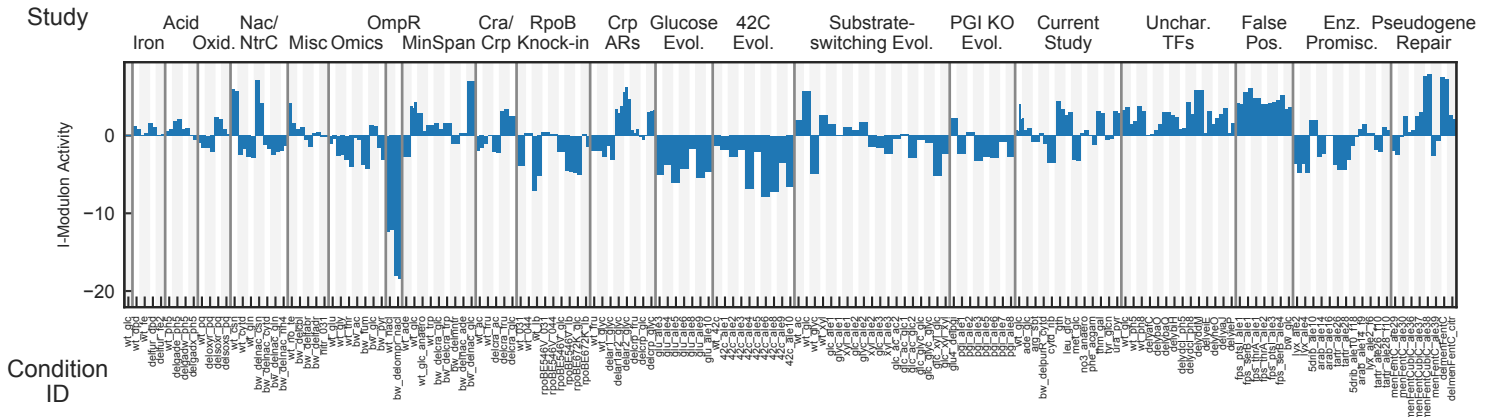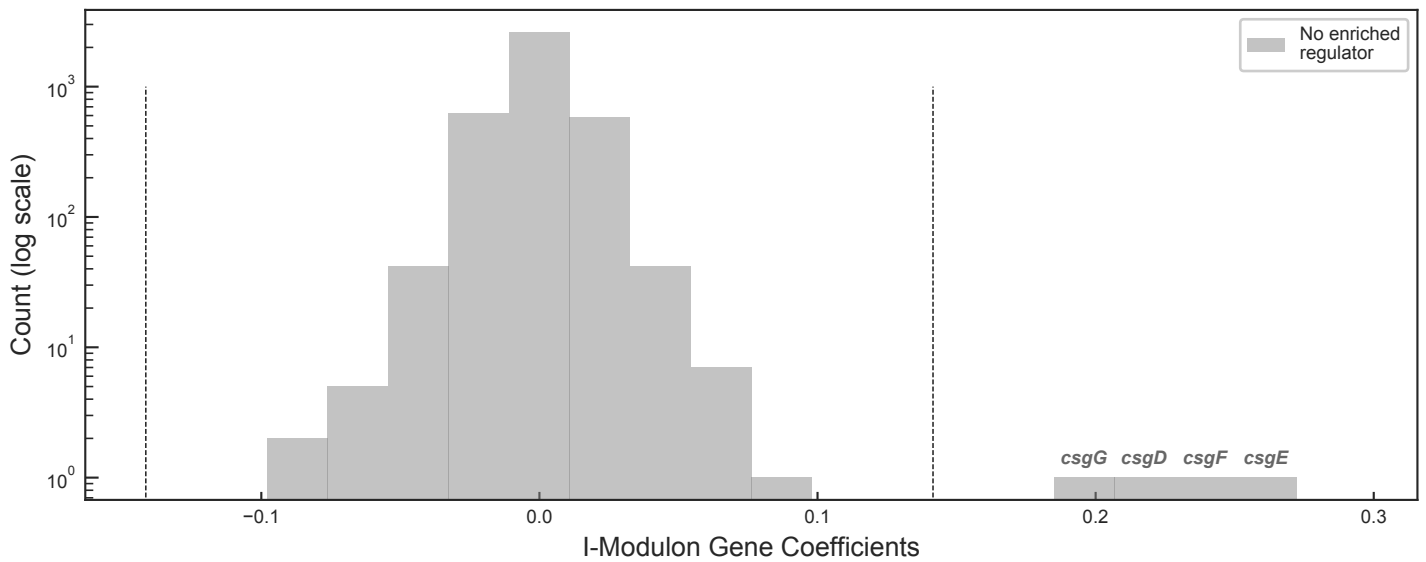



# deletion - 1 I-Modulon

Biological Function: Large deletion of 39 genes during evolution

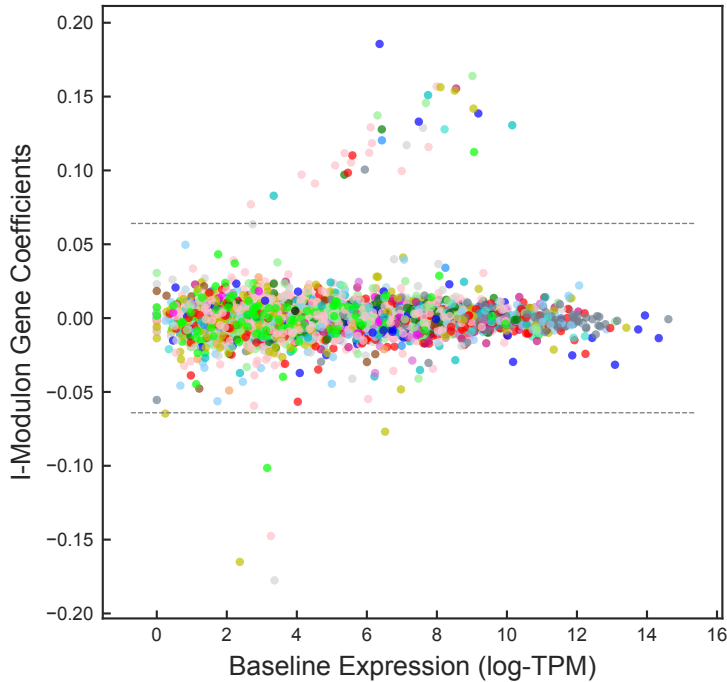

## COG Categories

- Carbohydrate transport and metabolism (6): *eda*, *hyi*, *kdgK*, *kduI*, *pykA*, *zwf*
- Cell wall/membrane/envelope biogenesis (3): *lpxM*, *mepM*, *prc*
- Inorganic ion transport and metabolism (3): *kdgT*, *yebZ*, *yobA*
- Signal transduction mechanisms (3): *msrC*, *pphA*, *proQ*
- Other (26): *cspC*, *kdgR*, *yebK*, *edd*, *ptrB*, *exoX*, *holE*, *purT*, *htpX*, *rlmA*, *rsmF*, *kduD*, *mgrB*, *yebE*, *yebF*, *yebG*, *yebO*, *yebS*, *yebT*, *yebV* + 6

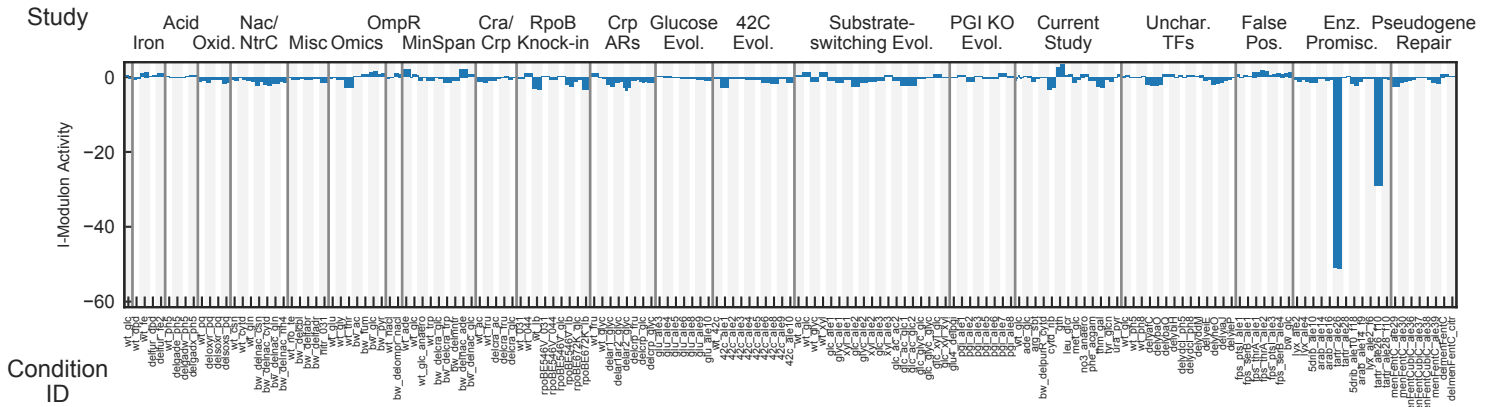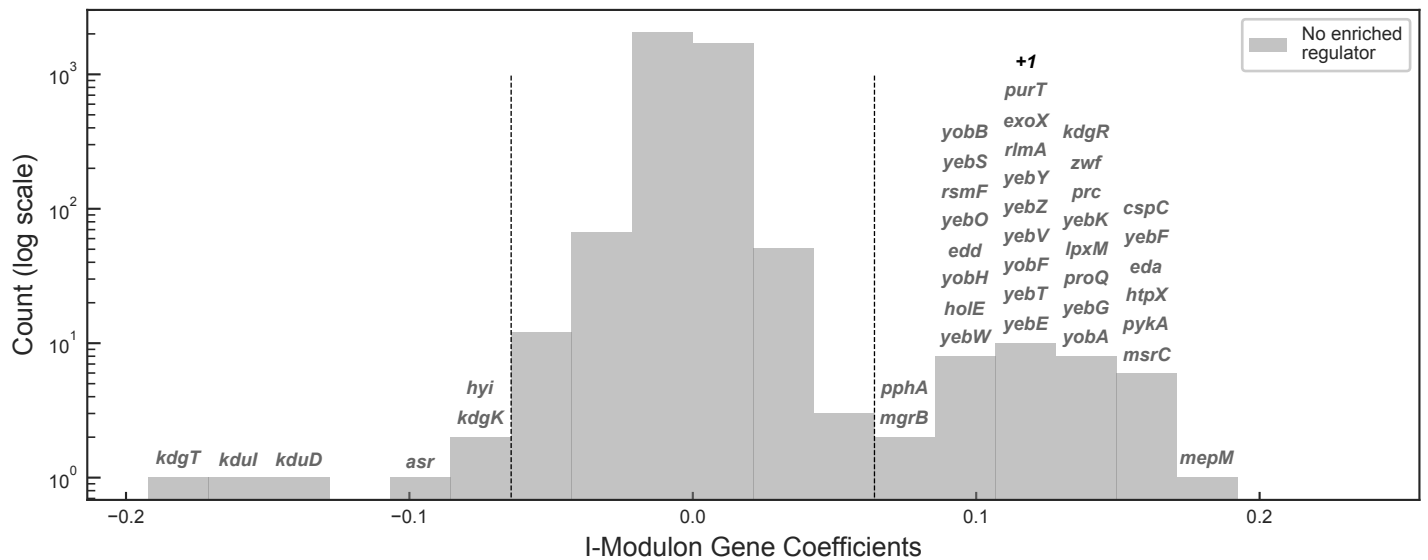

# deletion - 2 I-Modulon

Biological Function: Large deletion of 171 genes during evolution

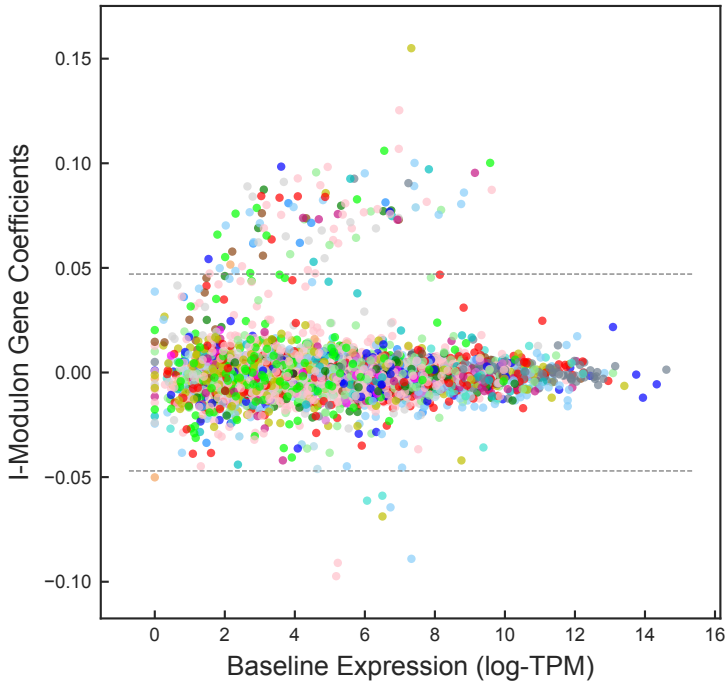

## COG Categories

- Energy production and conversion (16): *adhP, aldA, cybB, fdnG, fdnI, feaB, frmA, maeA, narV, narW, narY, narZ, patD, pfo, ydbC, yqhD*
- Inorganic ion transport and metabolism (11): *ddpB, ddpC, opgD, tehA, trkG, ydaN, ydcU, ydcV, yddb, ydeN, yncD*
- Transcription (7): *abgR, feaR, mcbR, paaX, racR, ydcN, ydcR*
- Amino acid transport and metabolism (5): *ddpA, ddpD, ddpF, ydcT, yddG*
- Other (71): *azoR, paaH, paaJ, ynbC, ynbD, hslJ, osmC, pqqL, ydcP, yncG, dbpA, hrpA, insQ, intr, recT, nhoA, paaK, tehB, tynA, ydcO + 51*

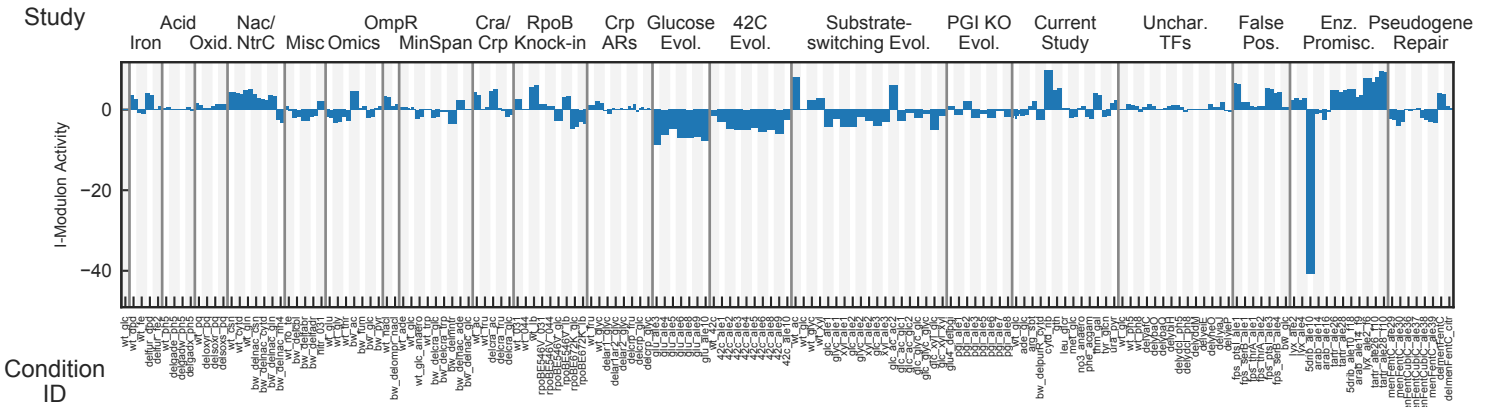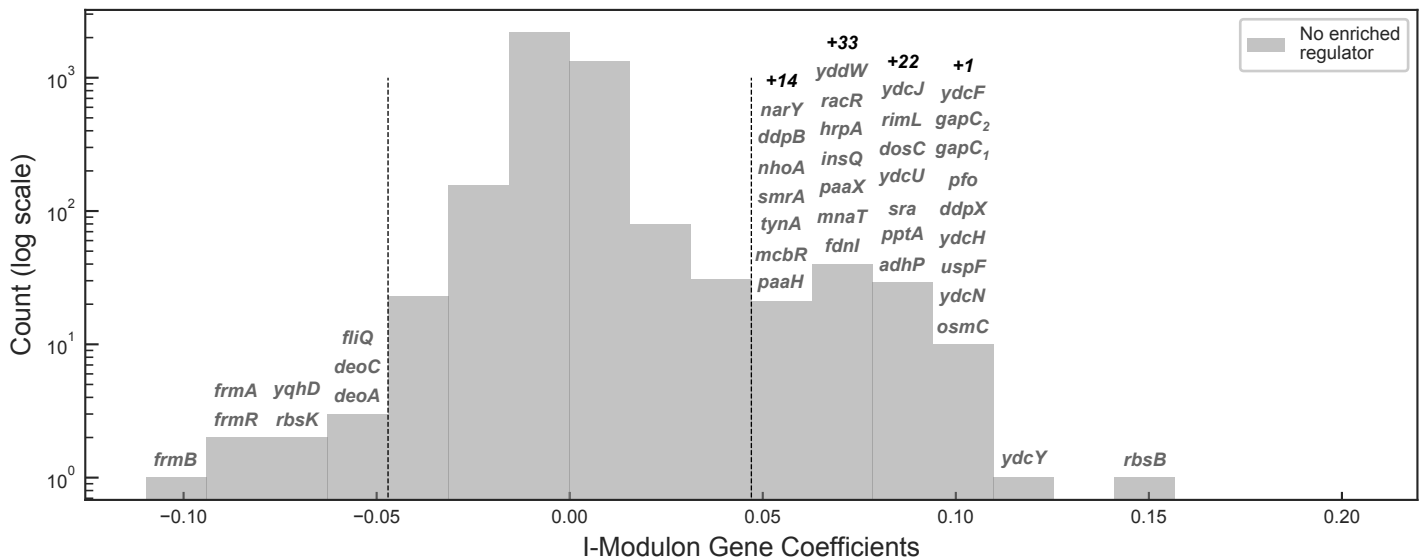

# duplication - 1 I-Modulon

Biological Function: Large duplication of 129 genes during evolution

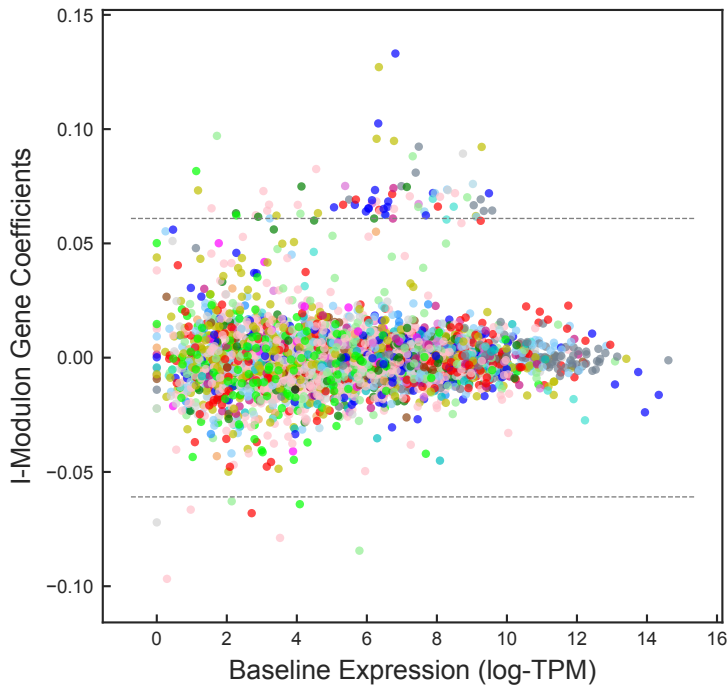

## COG Categories

- Cell wall/membrane/envelope biogenesis (16): *bhsA, galE, hldD, waaA, waaB, waaC, waaF, waaG, waaO, waaP, waaQ, waaR, waaU, waaY, waaZ, yiaD*
- Carbohydrate transport and metabolism (8): *galK, galM, galP, galT, gpmM, nepl, setC, yicL*
- Translation, ribosomal structure and biogenesis (8): *glyQ, glyS, rph<sub>1</sub>, rpmB, rpmG, selB, trmH, trmL*
- Other (52): *adiY, galR, rpoZ, spoT, yafY, yiaJ, yiaU, cysE, gltS, selA, tdh, yagE, yicL, bisC, ghrB, gpsA, ysaA, insK, ligB, recG* + 32

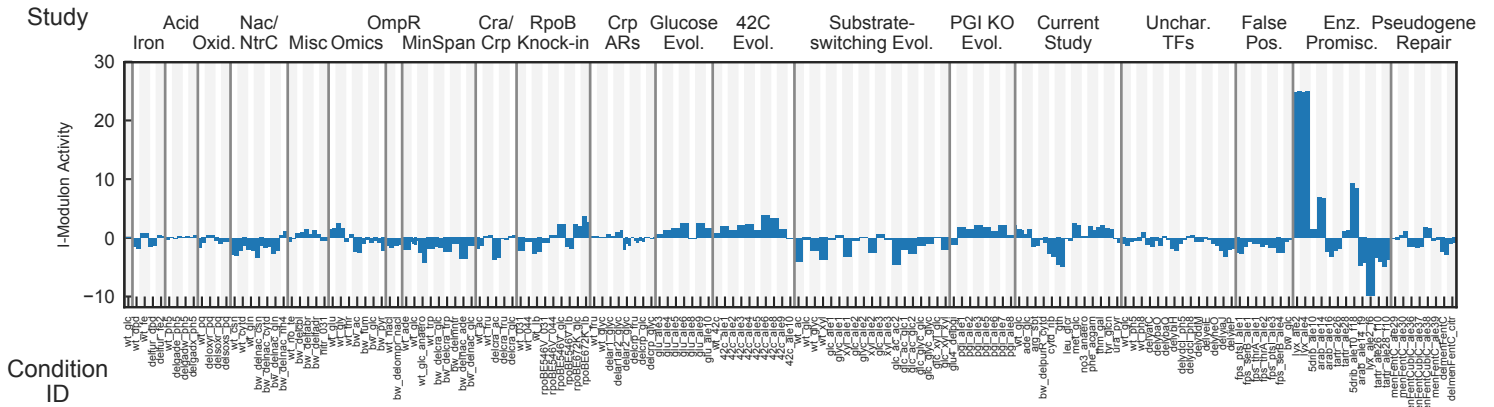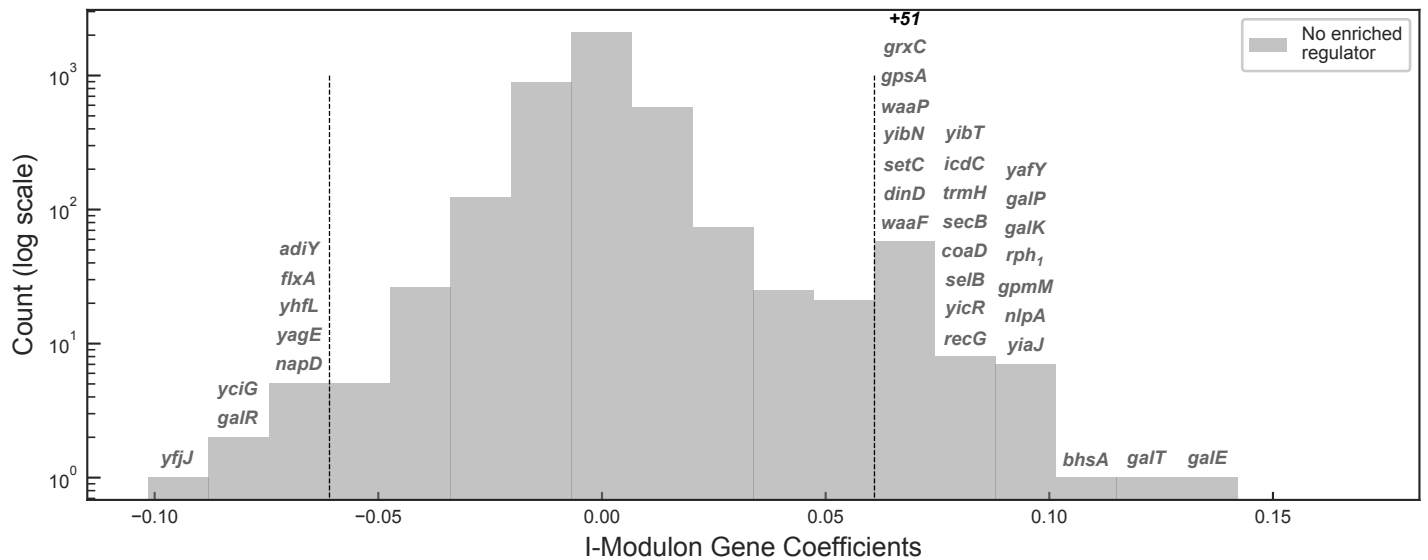

# e14 - deletion I-Modulon

Biological Function: Removal of e14 prophage

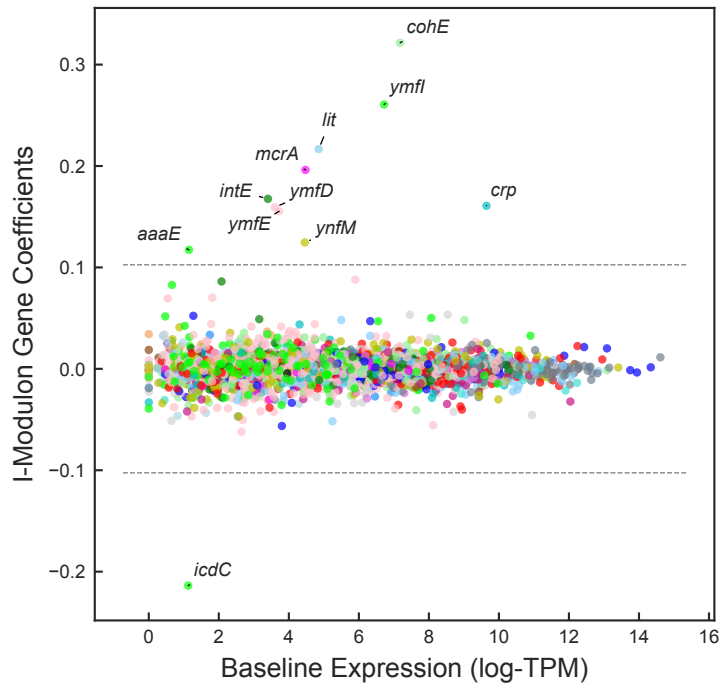

## COG Categories

- Carbohydrate transport and metabolism (1): *ynfM*
- Cell cycle control, cell division, chromosome partitioning (1): *lit*
- Defense mechanisms (1): *mcrA*
- Replication, recombination and repair (1): *intE*
- Signal transduction mechanisms (1): *crp*
- Transcription (1): *cohE*
- No COG Annotation (3): *aaaE*, *icdC*, *ymfI*
- Function unknown (2): *ymfD*, *ymfE*

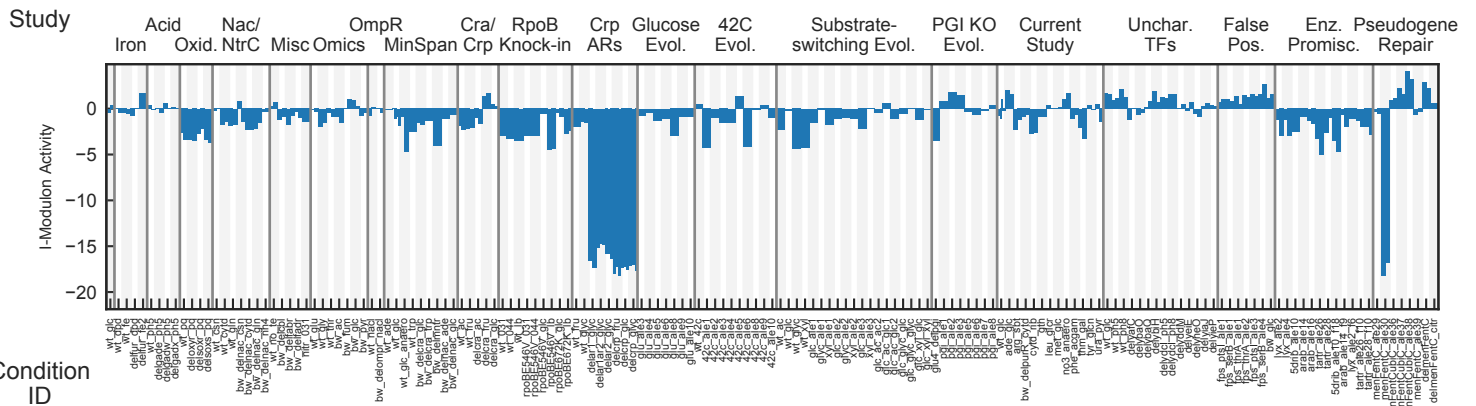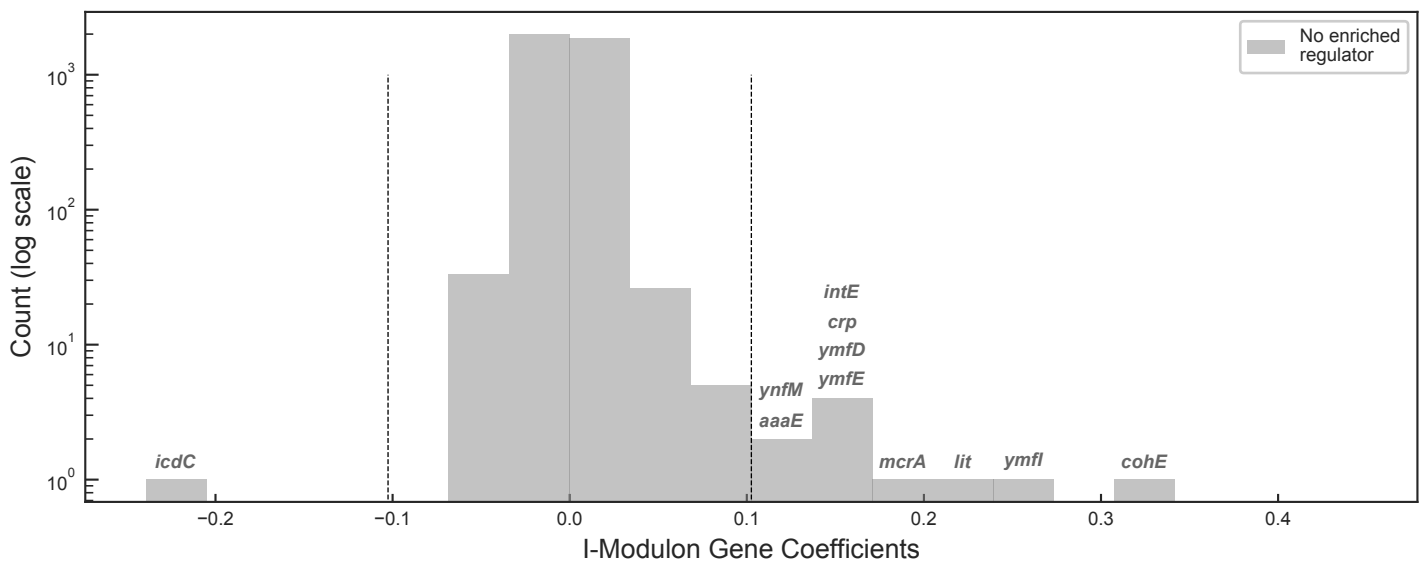

# e<sub>f</sub>eU – repair I-Modulon

Biological Function: Accounts for repair and expression of e<sub>f</sub>eU operon

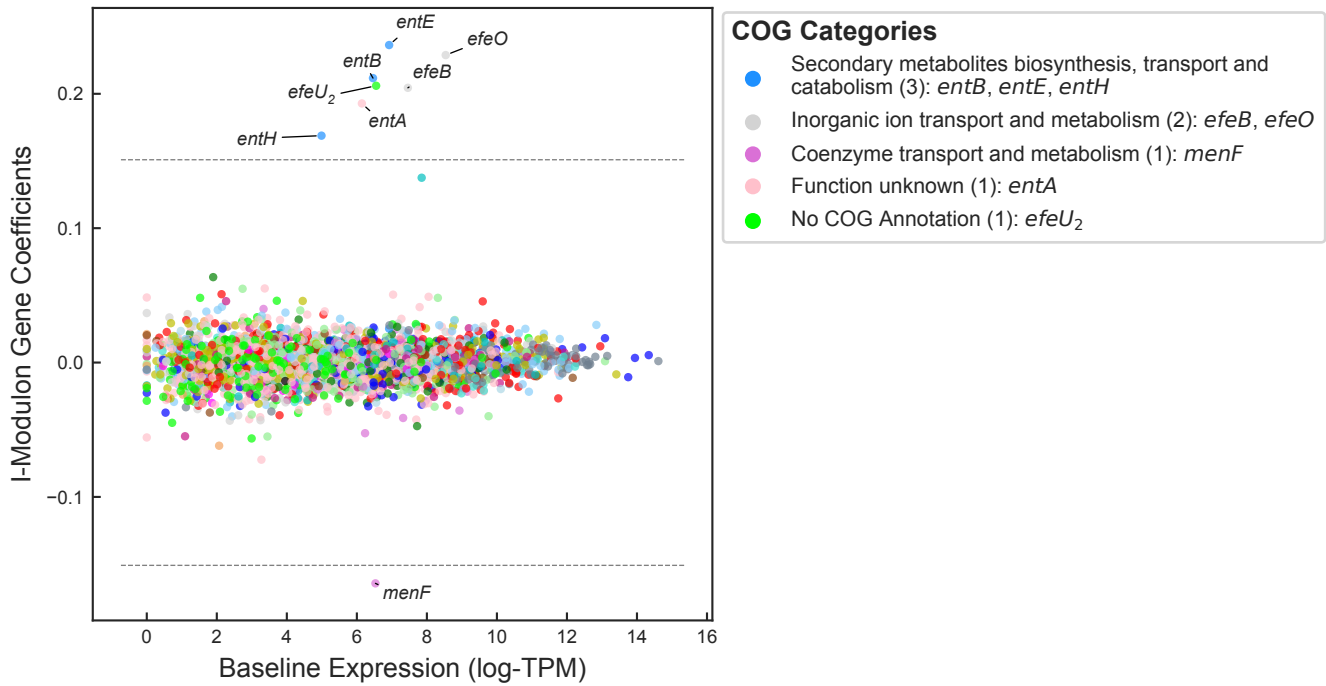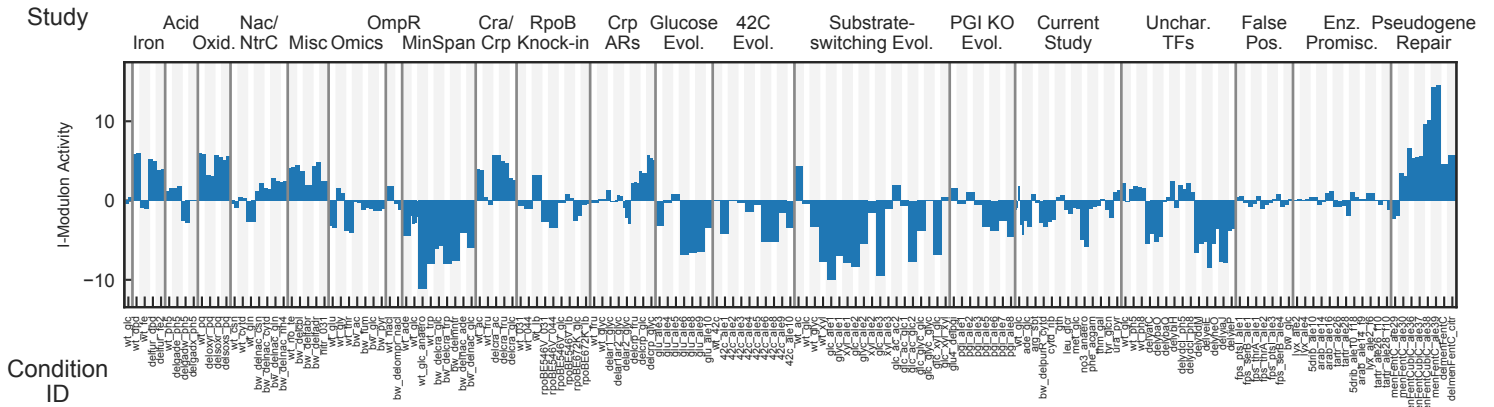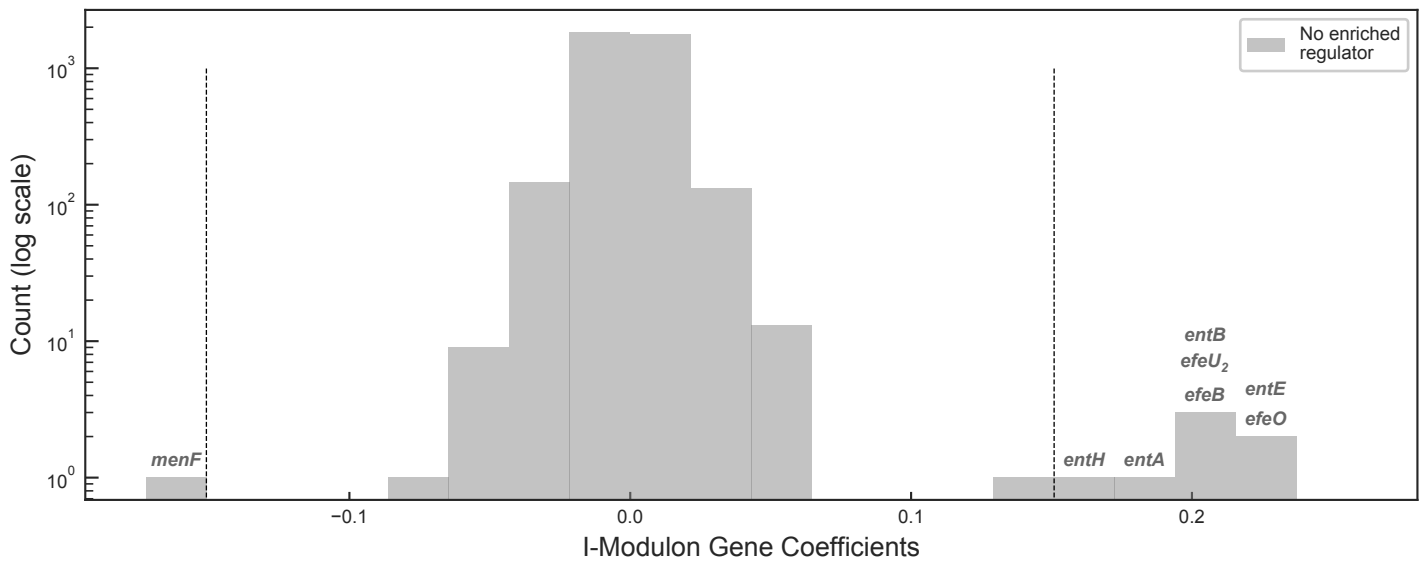

# entC – menF – KO I-Modulon

Biological Function: Accounts for entC and menF knock-outs

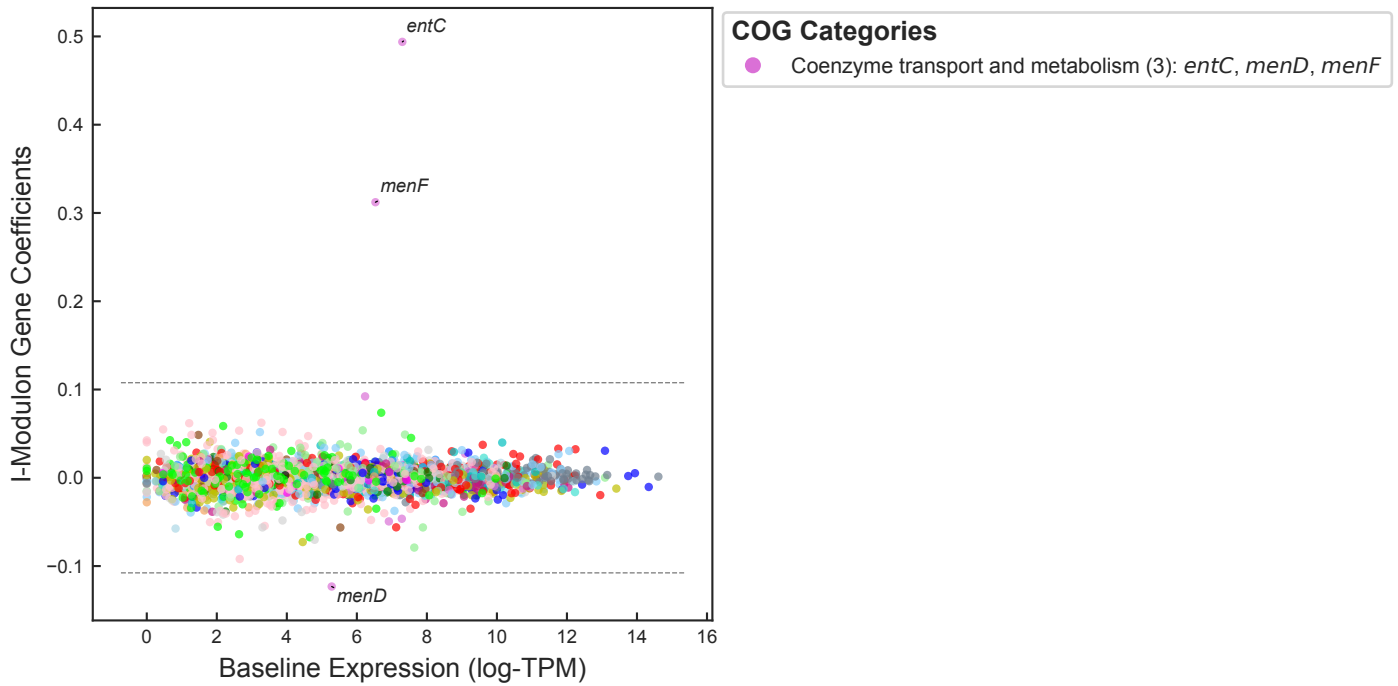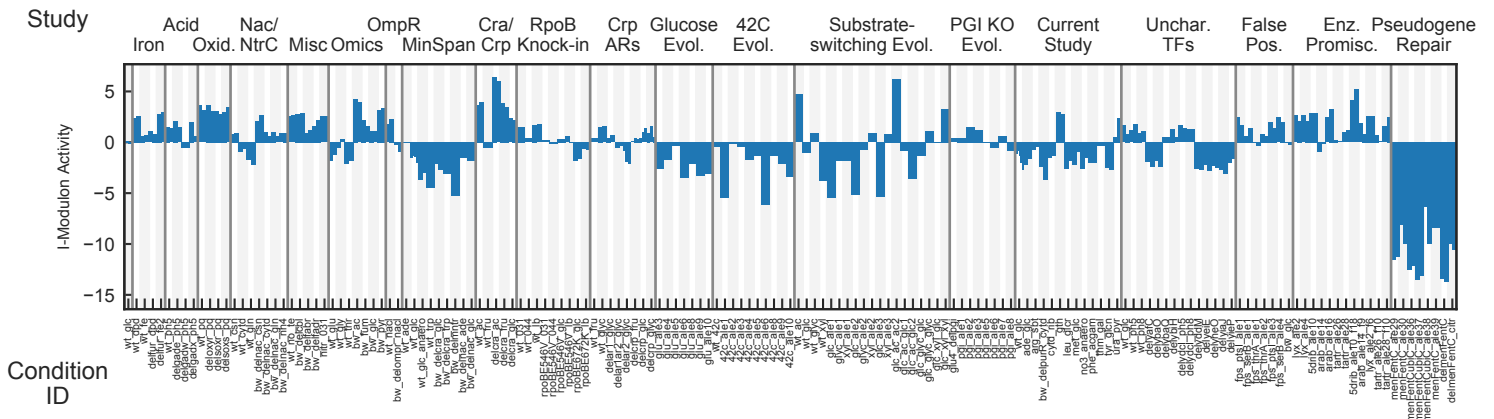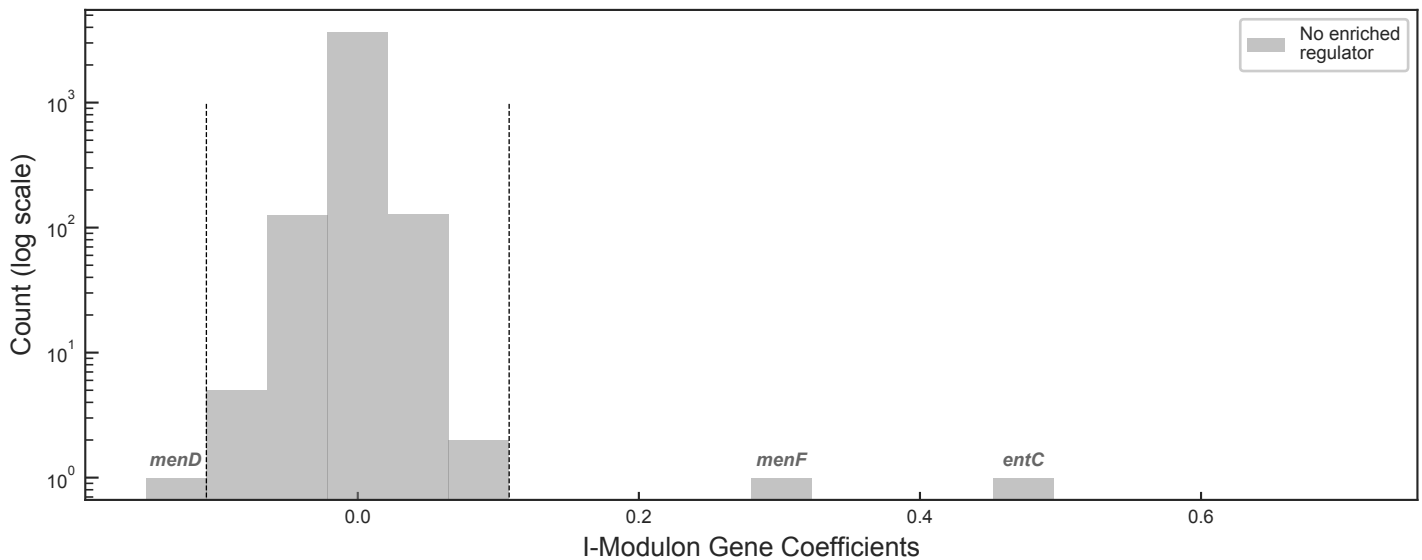

# fimbriae I-Modulon

Biological Function: Fimbriae assembly

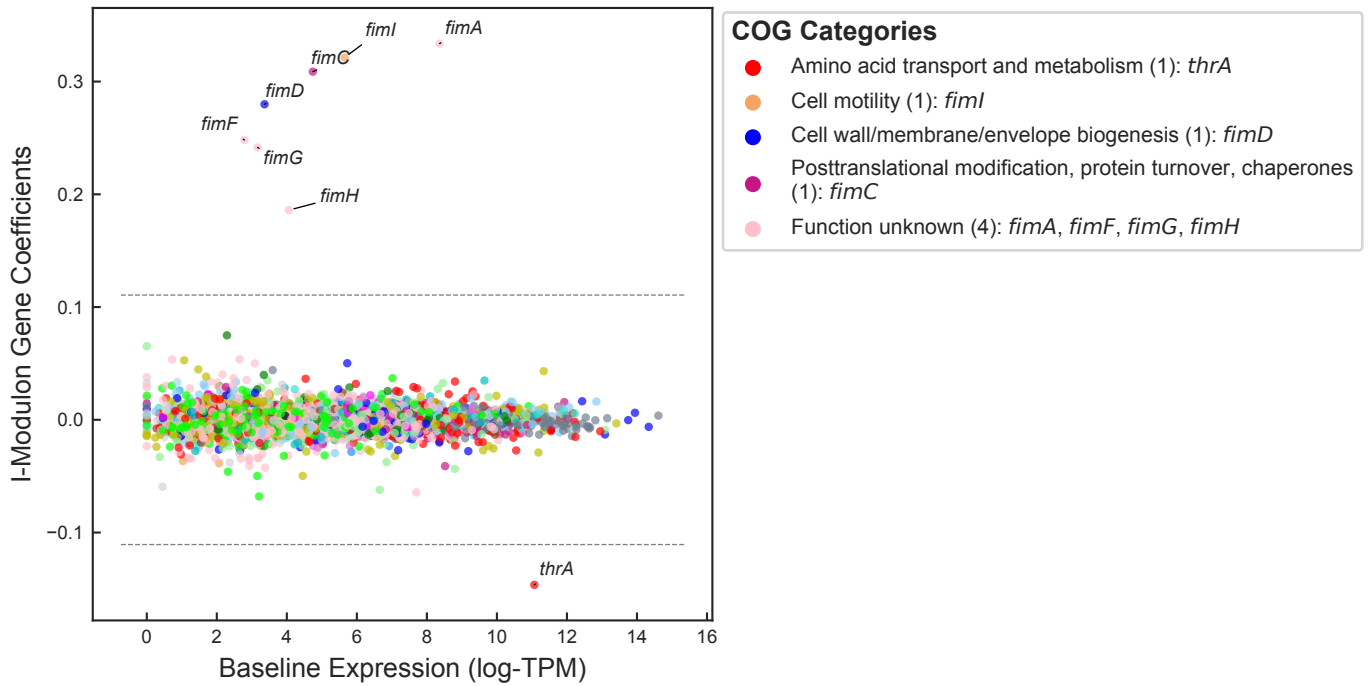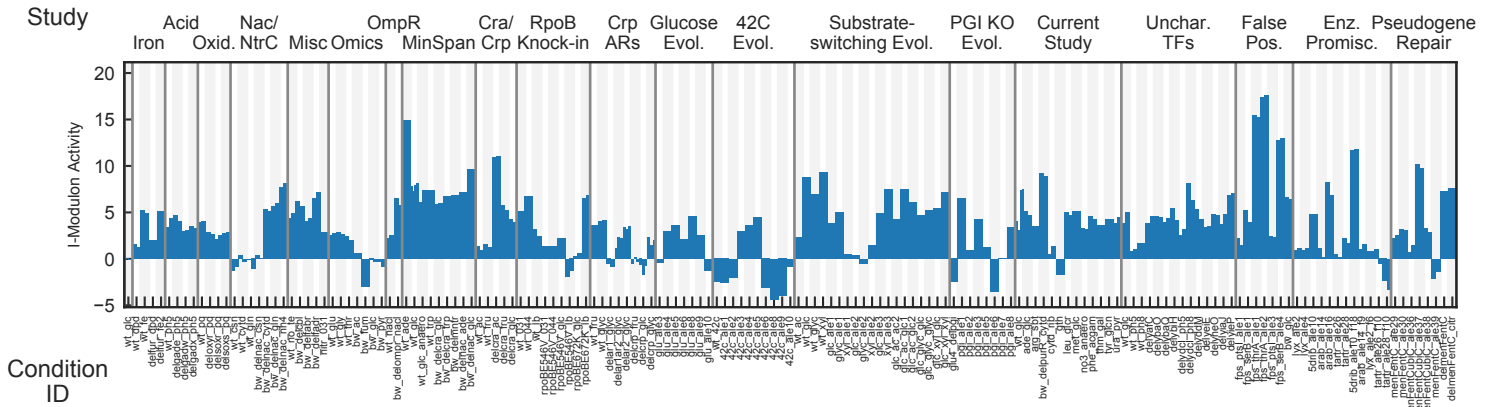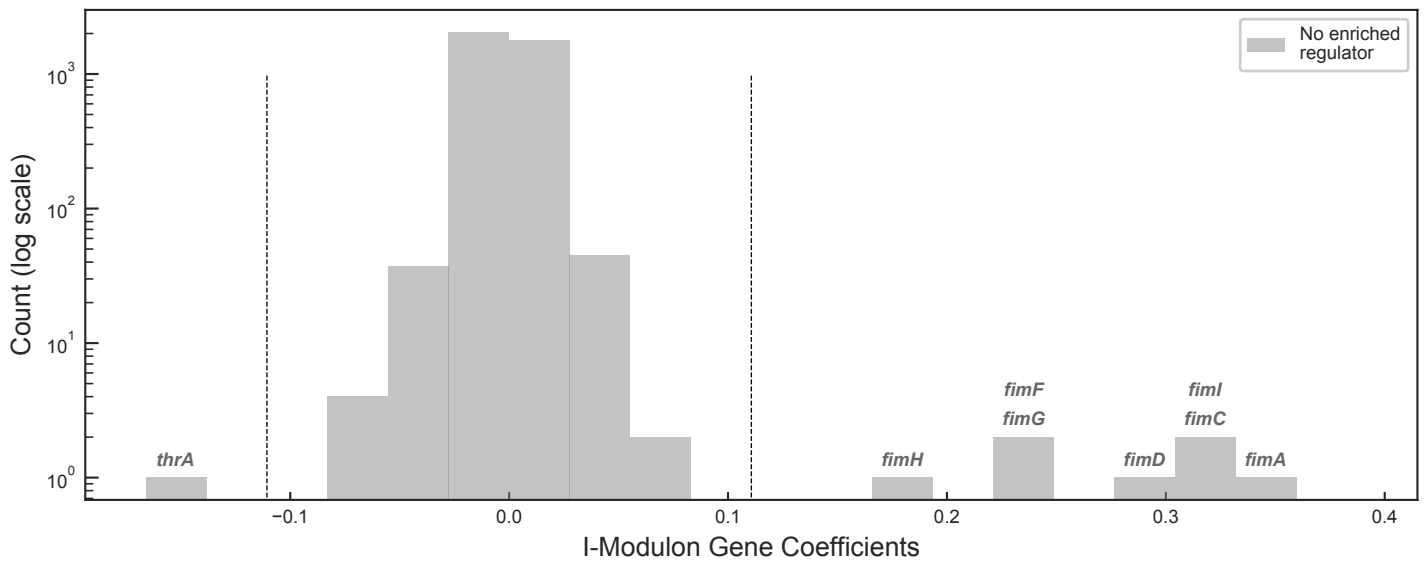

# flu – yeeRS I-Modulon

Biological Function: Genes in CP4-44 prophage

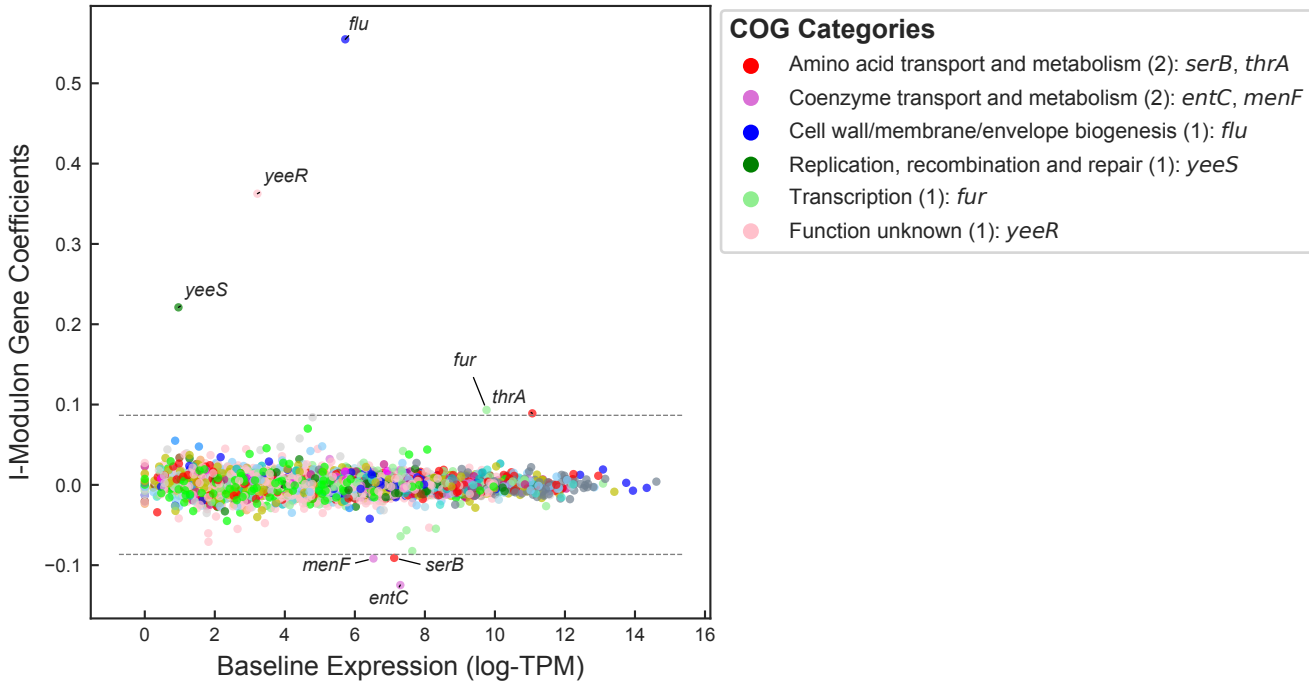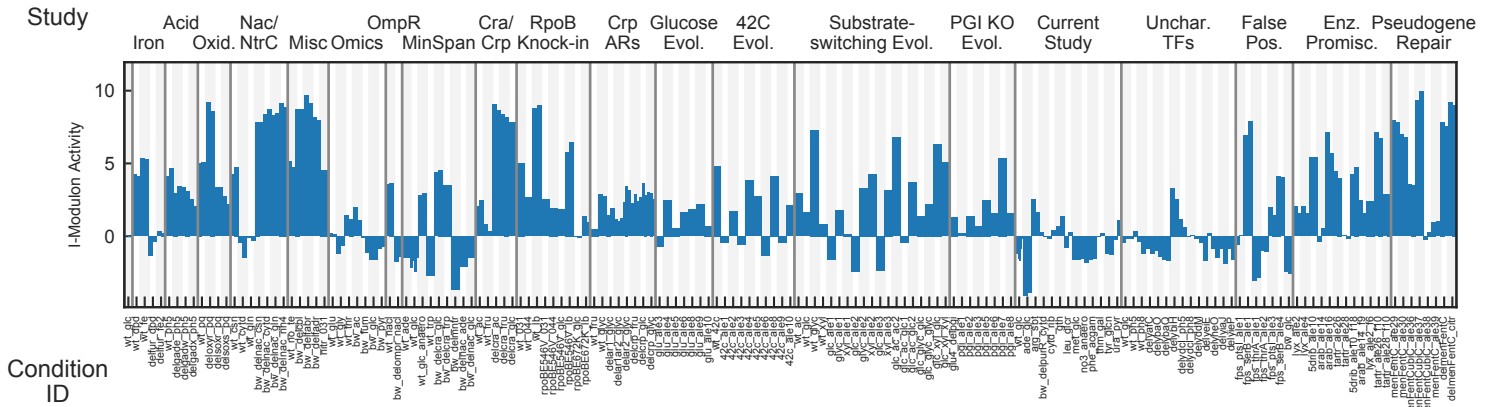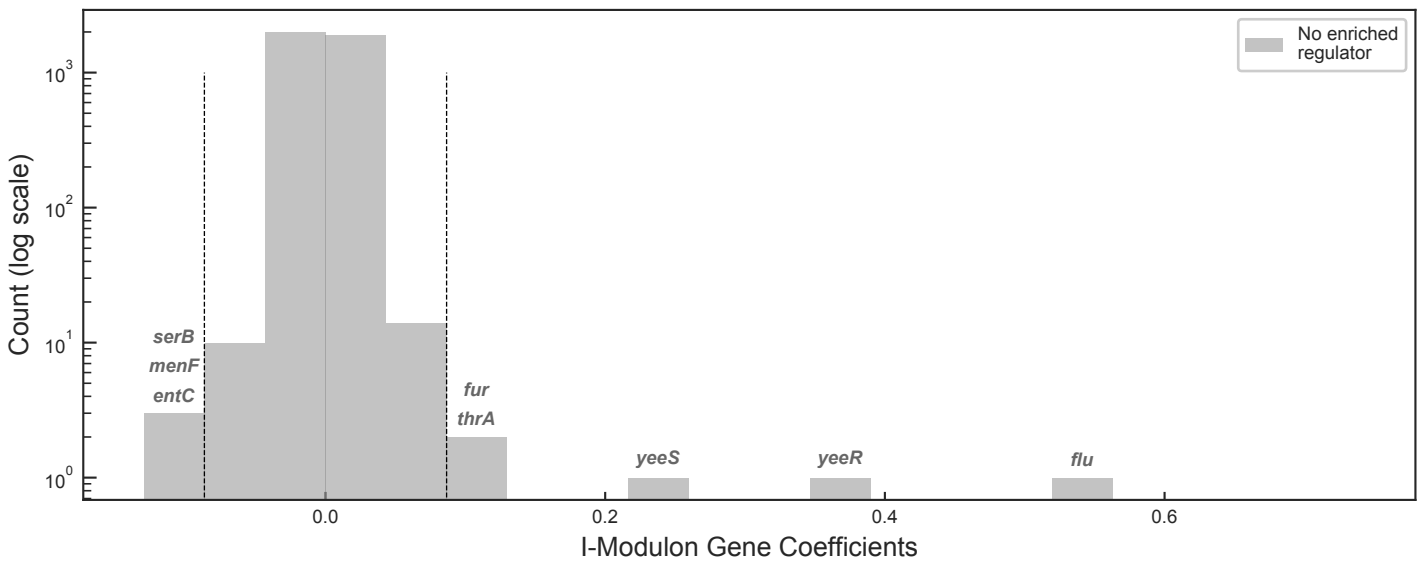



# fur – KO I-Modulon

Biological Function: Accounts for fur knock-out

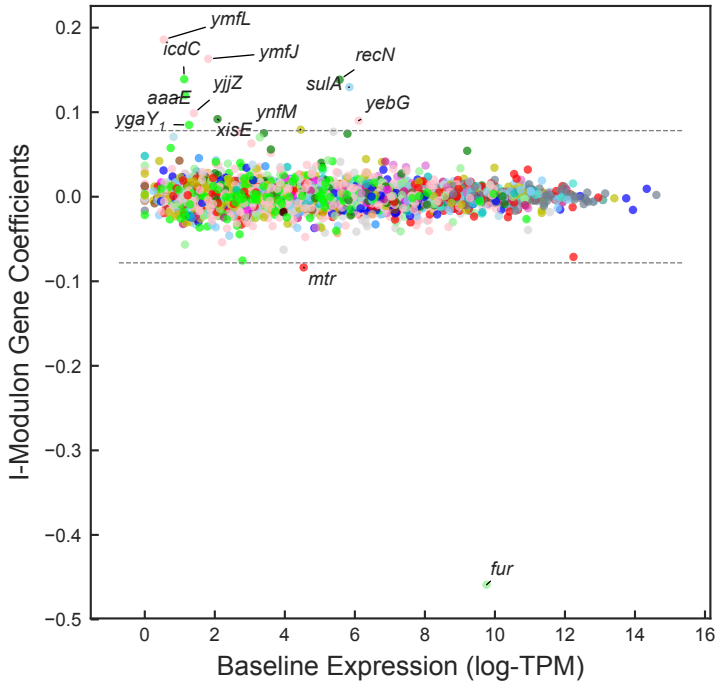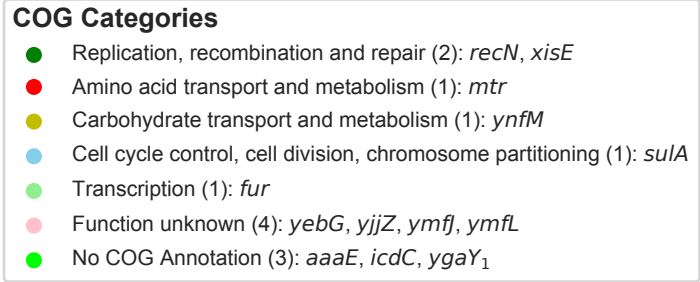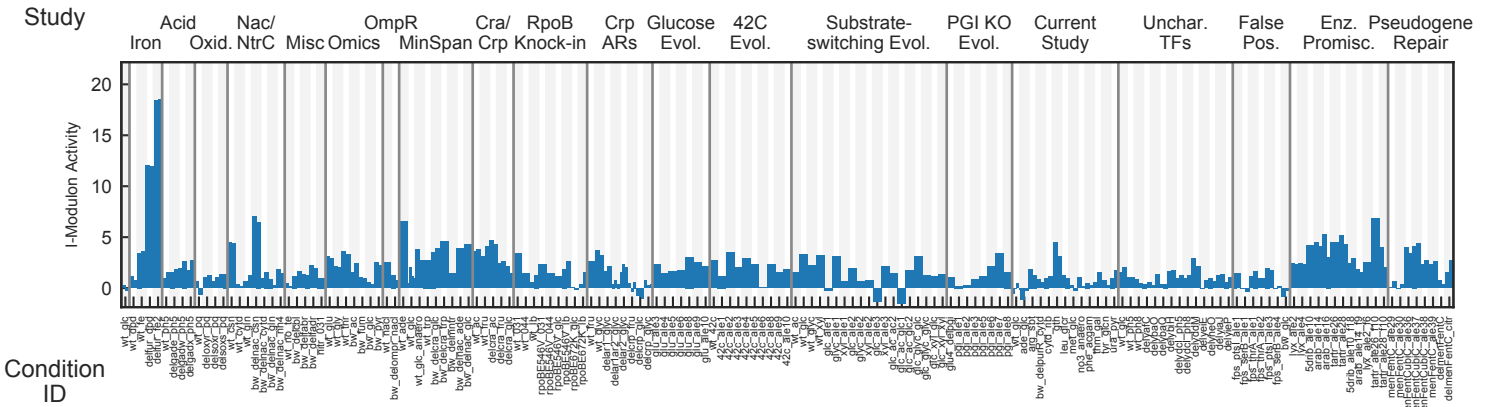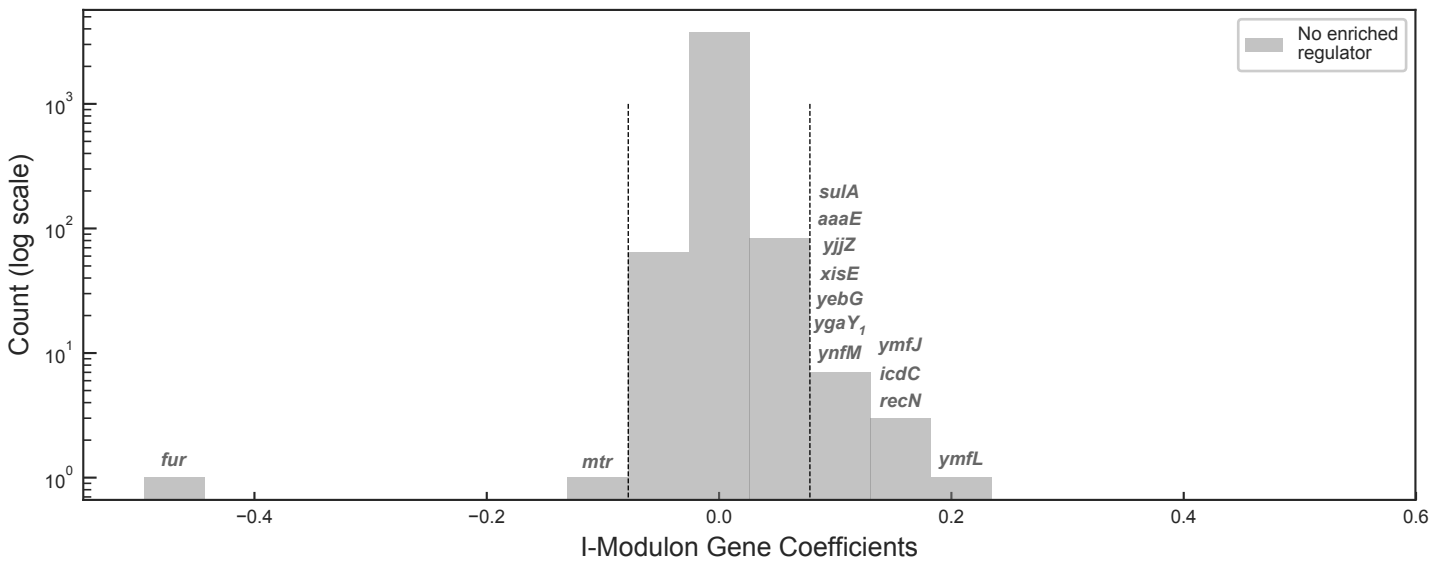

# gadWX – KO I-Modulon

Biological Function: Accounts for gadW and gadX knock-outs

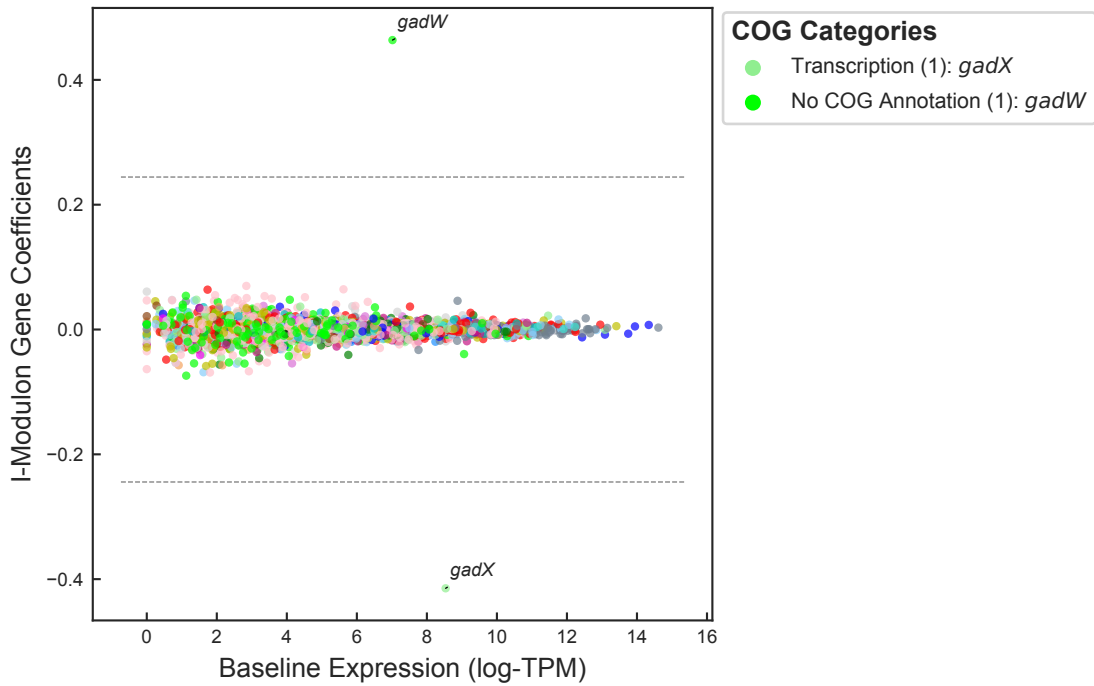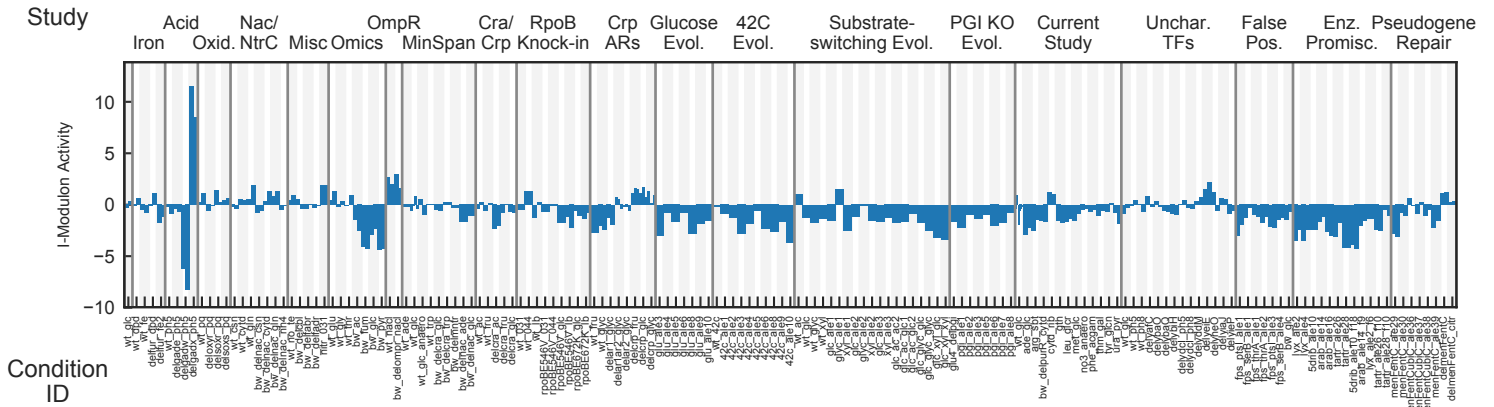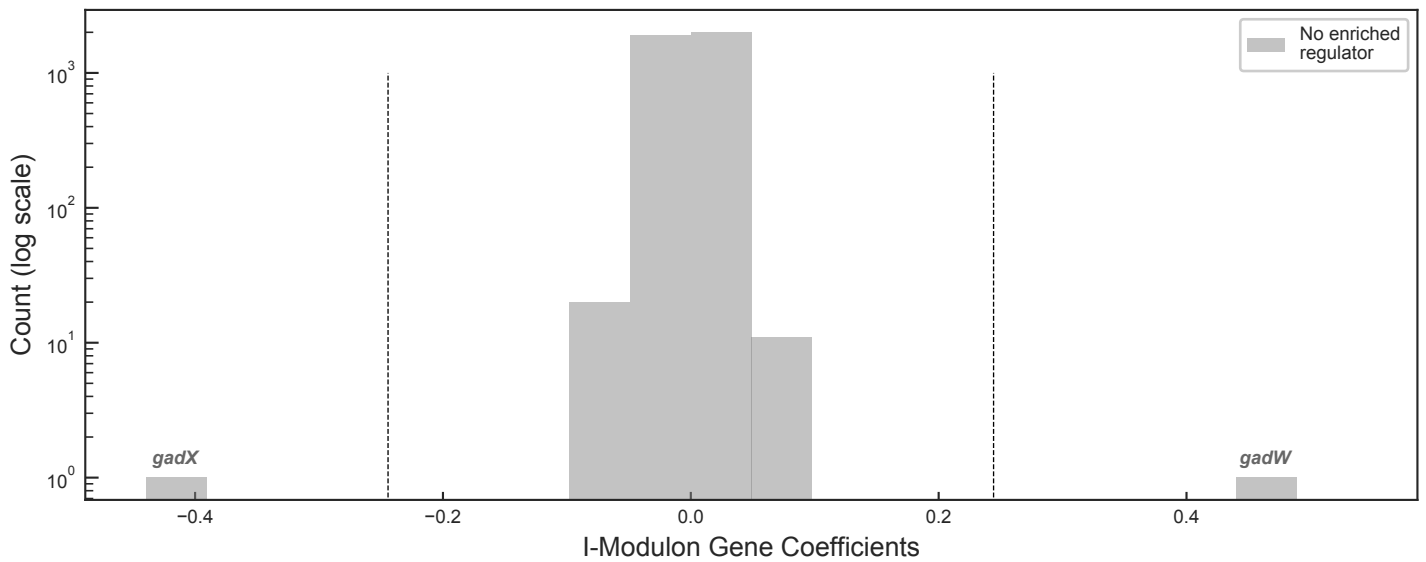

# insertion I-Modulon

Biological Function: IS2 insertion element after laboratory evolution

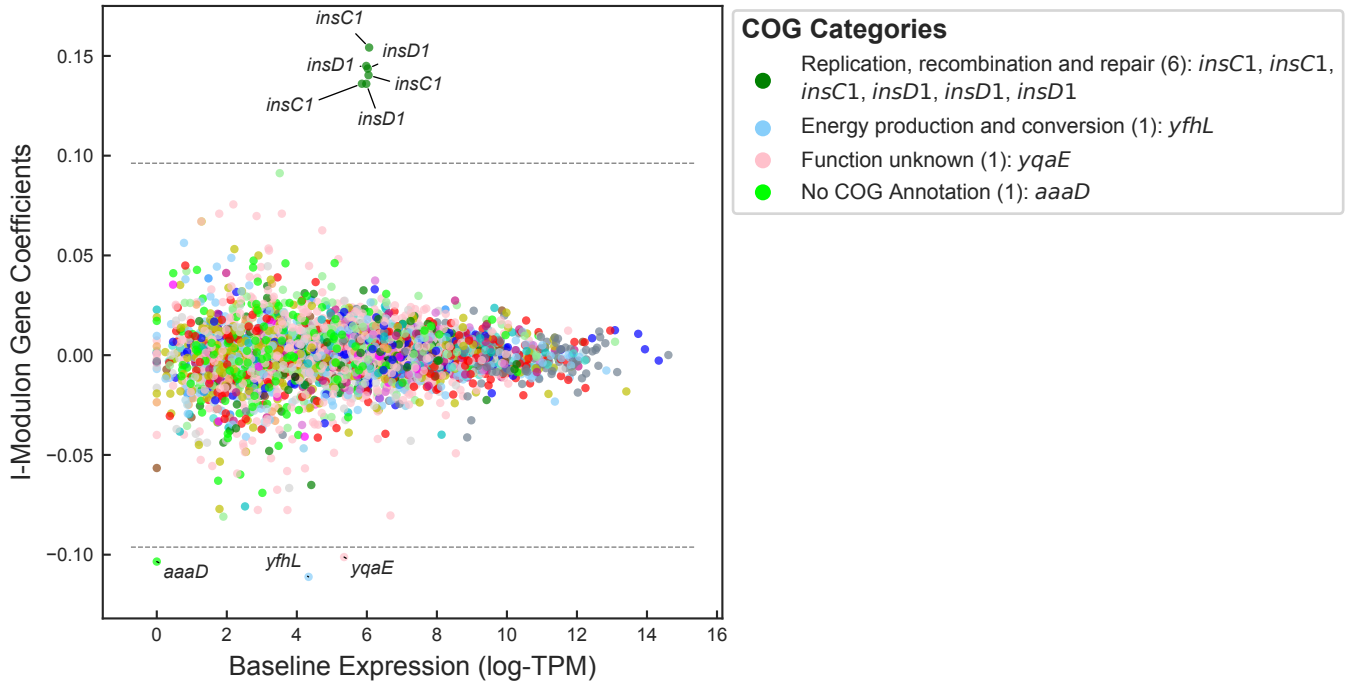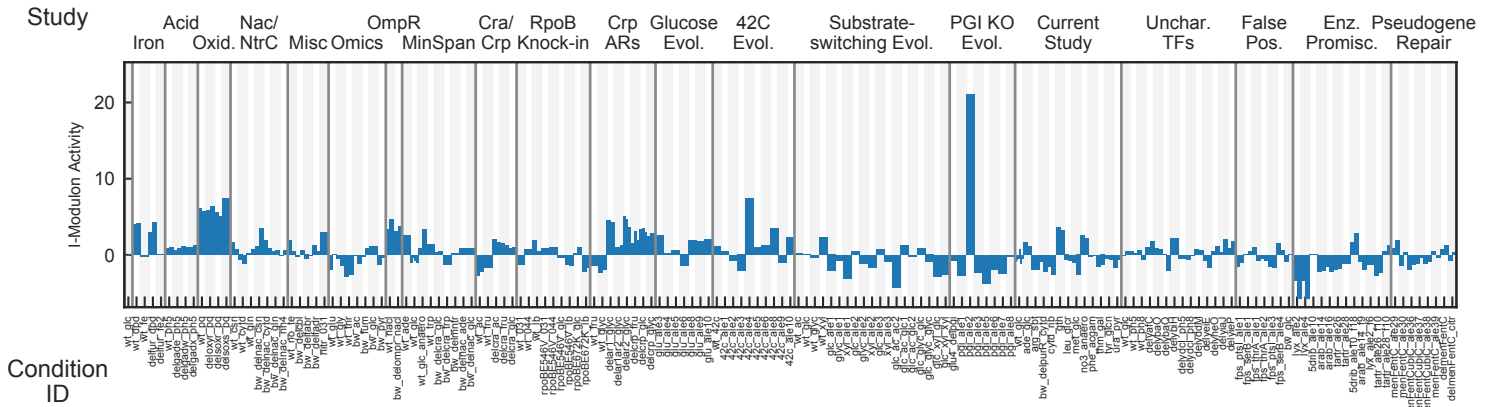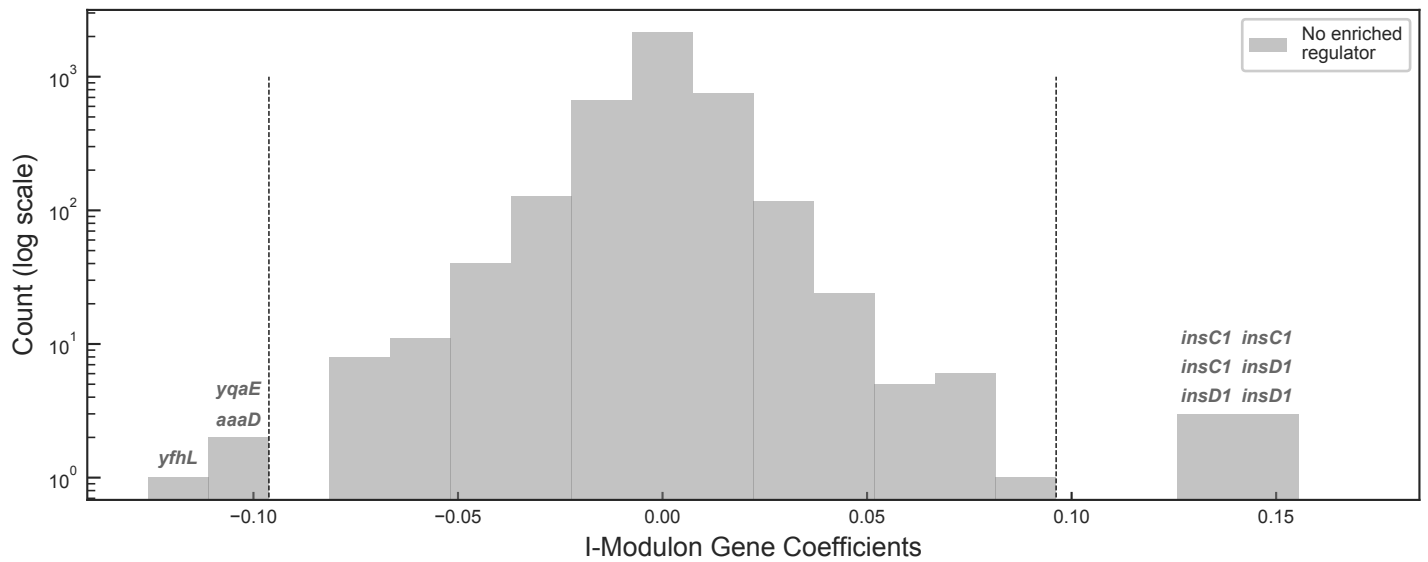

# iron – related I-Modulon

Biological Function: Related to iron metabolism

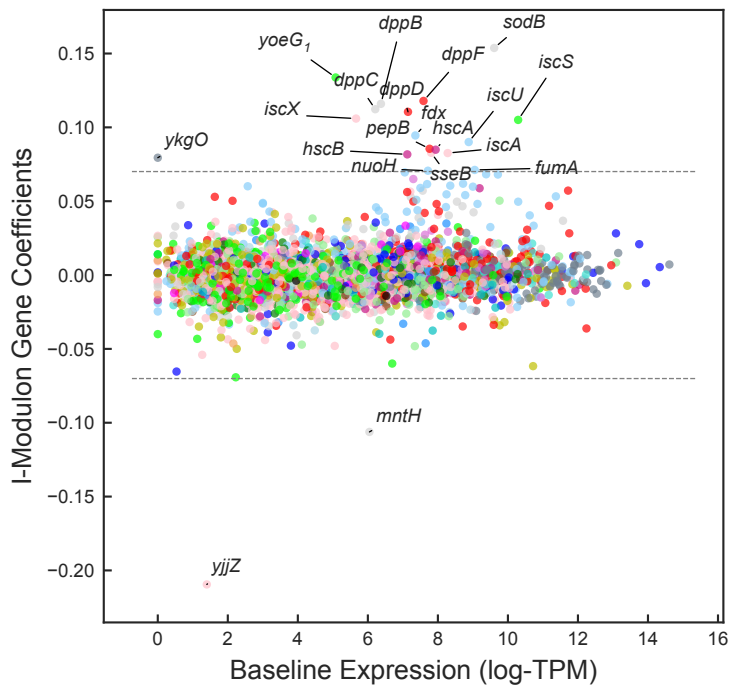

## COG Categories

- Energy production and conversion (4): *fdx, fumA, iscU, nuoH*
- Inorganic ion transport and metabolism (4): *dppB, dppC, mntH, sodB*
- Amino acid transport and metabolism (3): *dppD, dppF, pepB*
- Posttranslational modification, protein turnover, chaperones (2): *hscA, hscB*
- Translation, ribosomal structure and biogenesis (1): *ykgO*
- Function unknown (4): *iscA, iscX, sseB, yjjZ*
- No COG Annotation (2): *iscS, yoeG1*

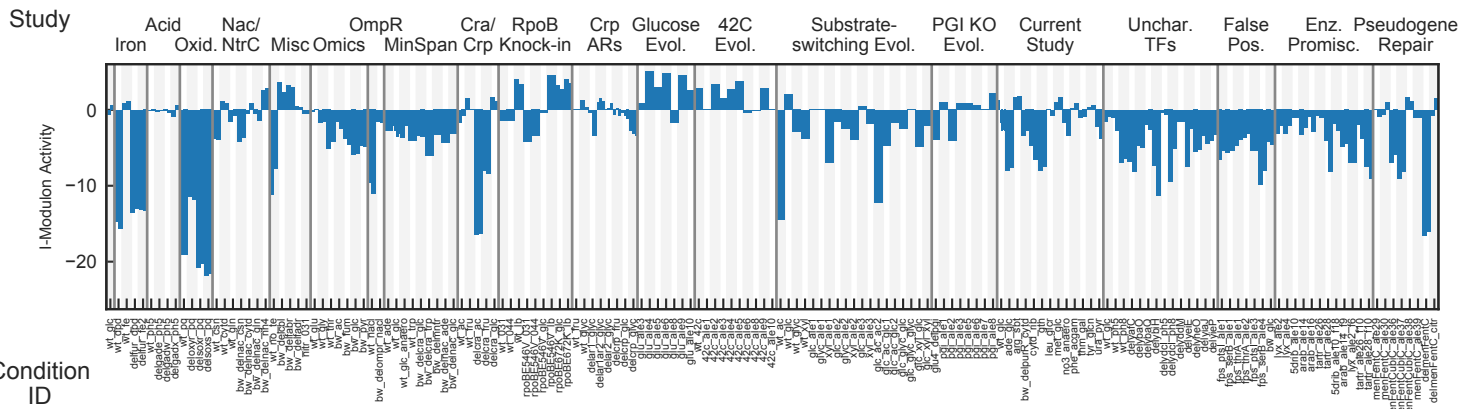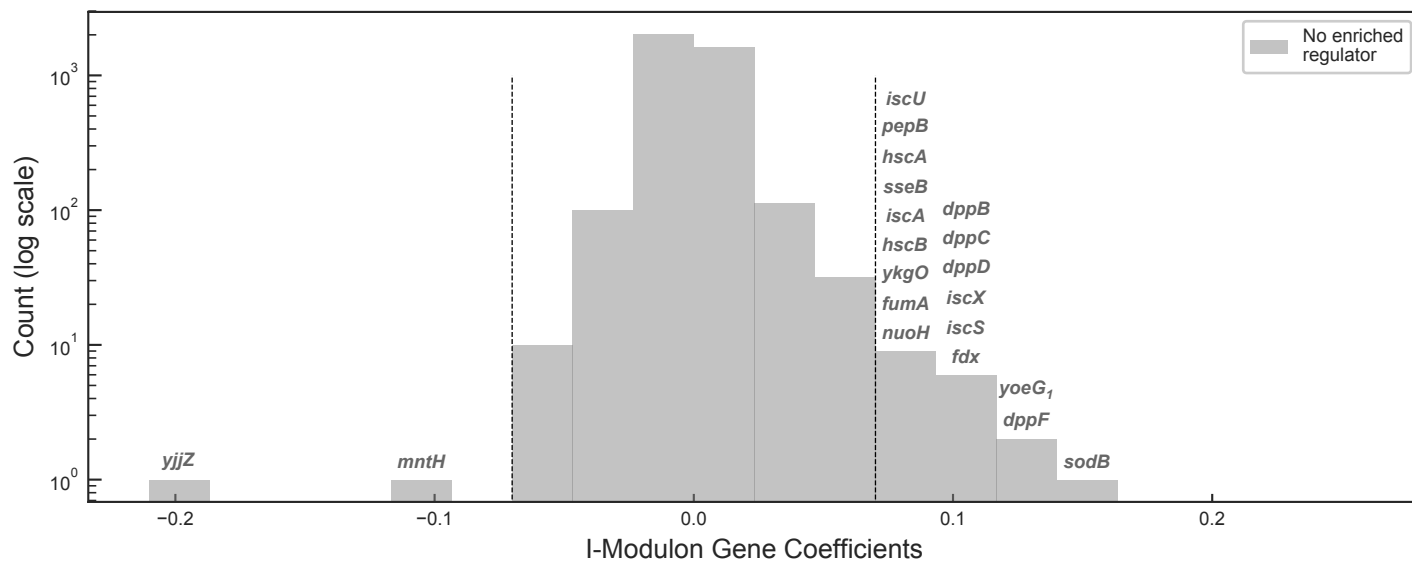

# lipopolysaccharide I-Modulon

Biological Function: Lipopolysaccharide biosynthesis

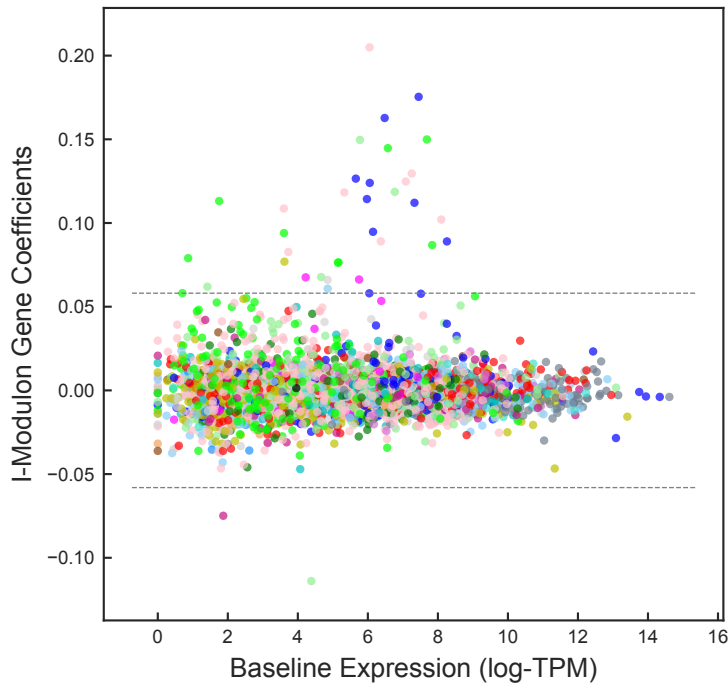

## COG Categories

- Cell wall/membrane/envelope biogenesis (8): *glf*, *waaO*, *waaR*, *waaU*, *waaY*, *waaZ*, *wbbK*, *wzxB*
- Transcription (5): *appY*, *gadE*, *glpR<sub>1</sub>*, *ybcM*, *yqeH*
- Defense mechanisms (2): *mcrB*, *mcrC*
- Carbohydrate transport and metabolism (1): *yjhB*
- Cell cycle control, cell division, chromosome partitioning (1): *lit*
- Other (19): *trkG*, *hypC*, *gtrS*, *wbbH*, *wbbL<sub>1</sub>*, *wbbL<sub>2</sub>*, *yabP<sub>2</sub>*, *ycdC*, *ydfO*, *yjbl<sub>3</sub>*, *yjgL*, *gnsB*, *waaL*, *waaS*, *wbbI*, *yfjW*, *yibA*, *yibB*, *ymfD*

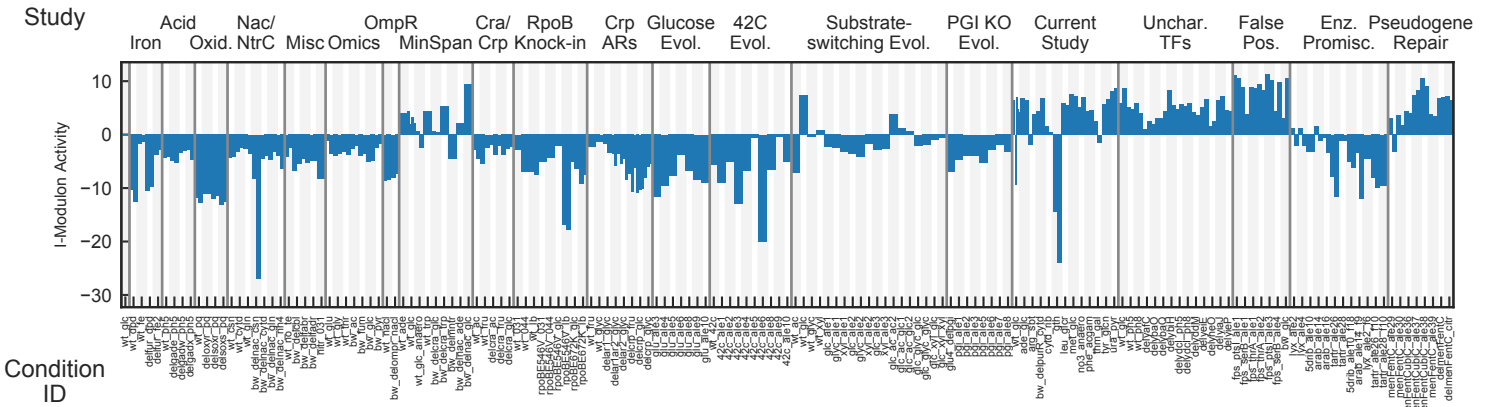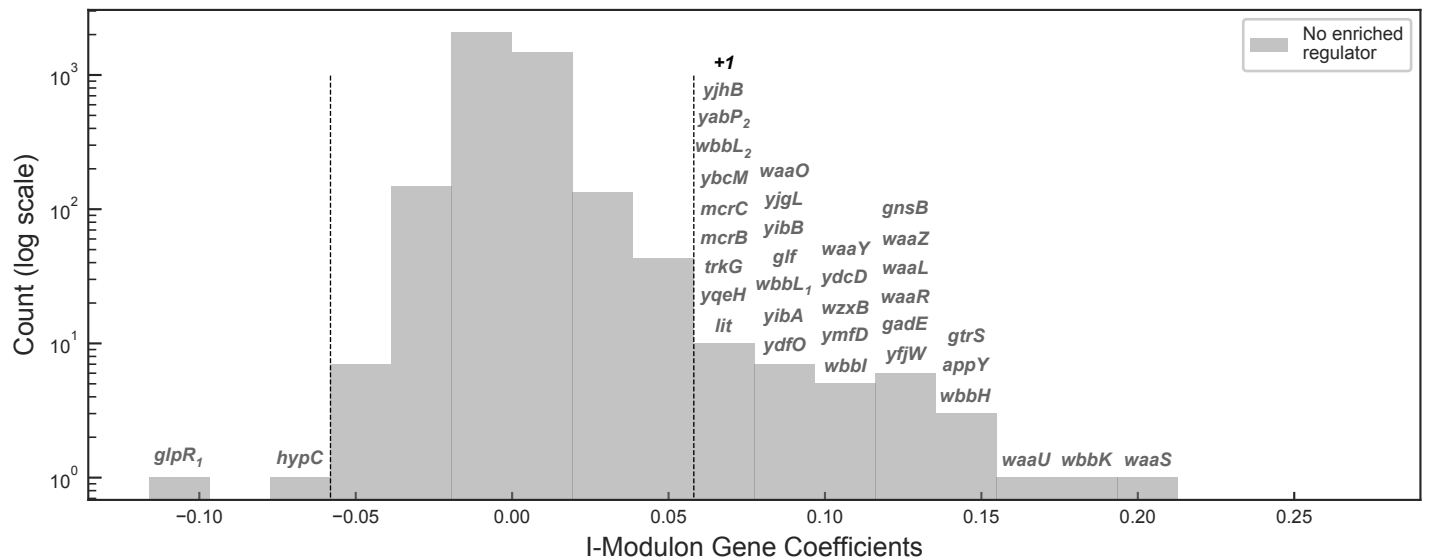

# membrane I-Modulon

Biological Function: Enriched in membrane-bound proteins

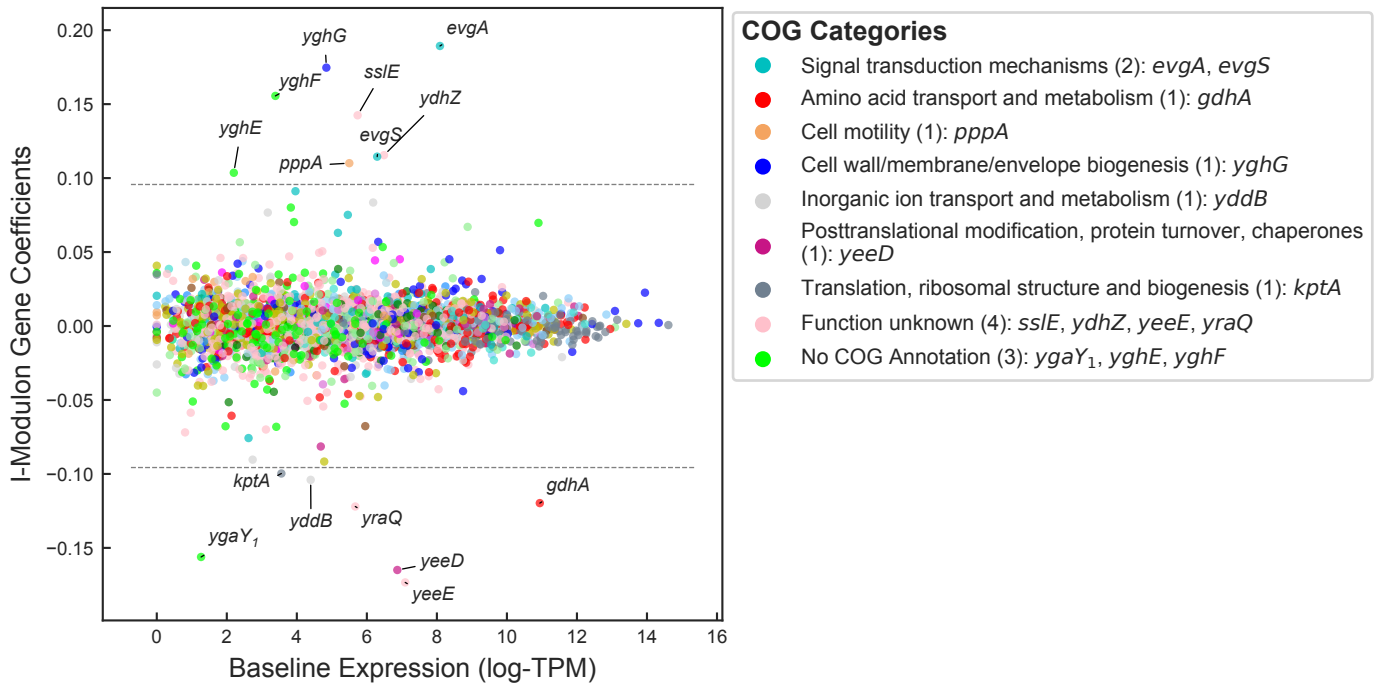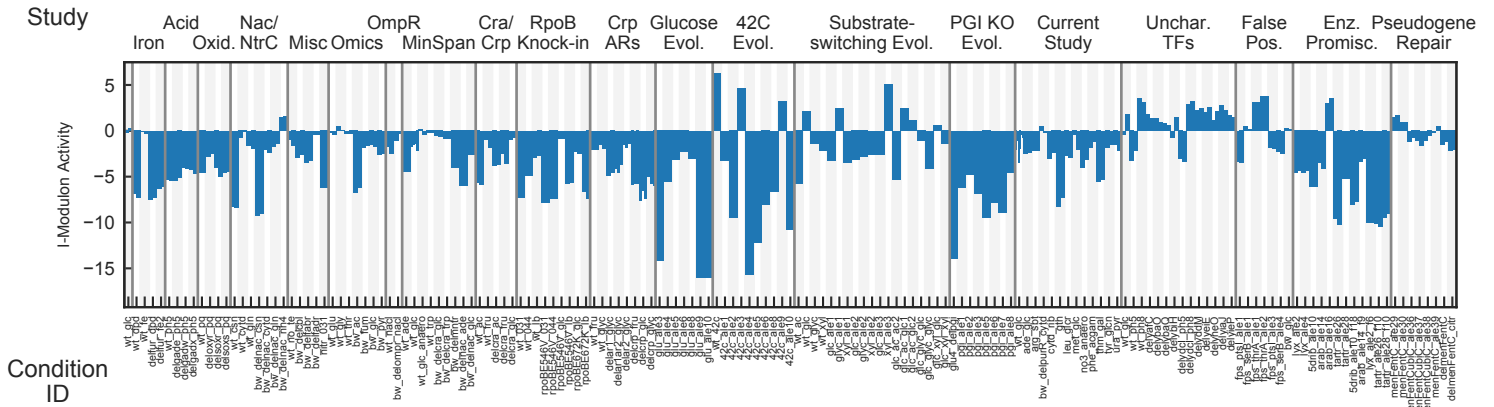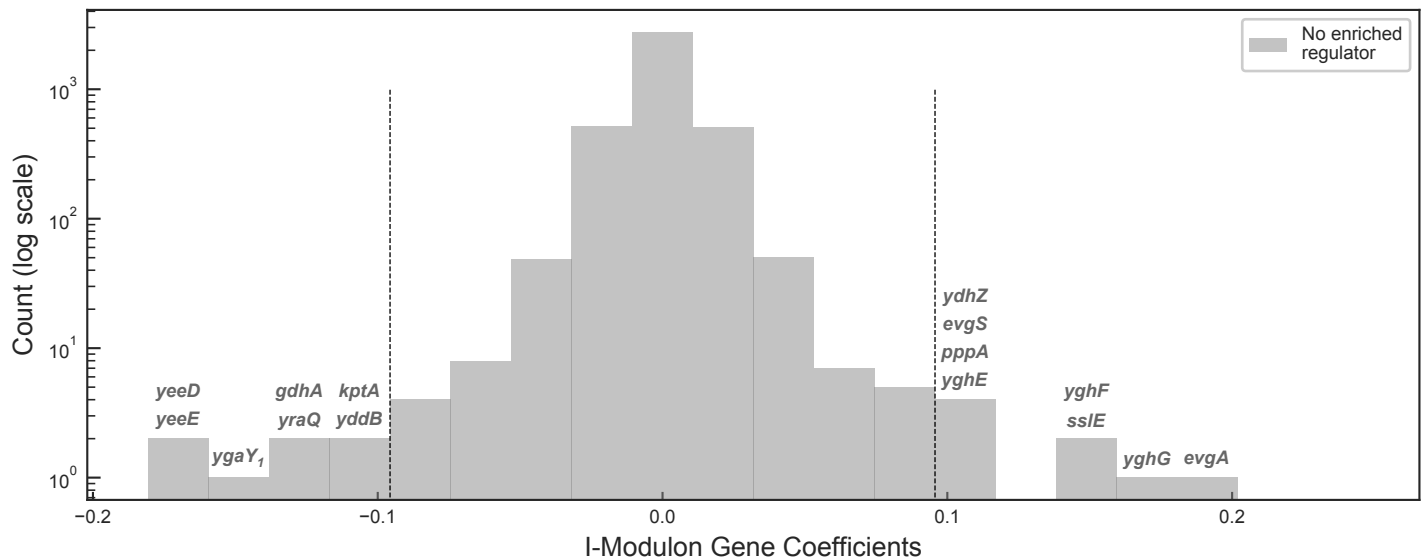

# nitrate – related I-Modulon

Biological Function: Nitric oxide response

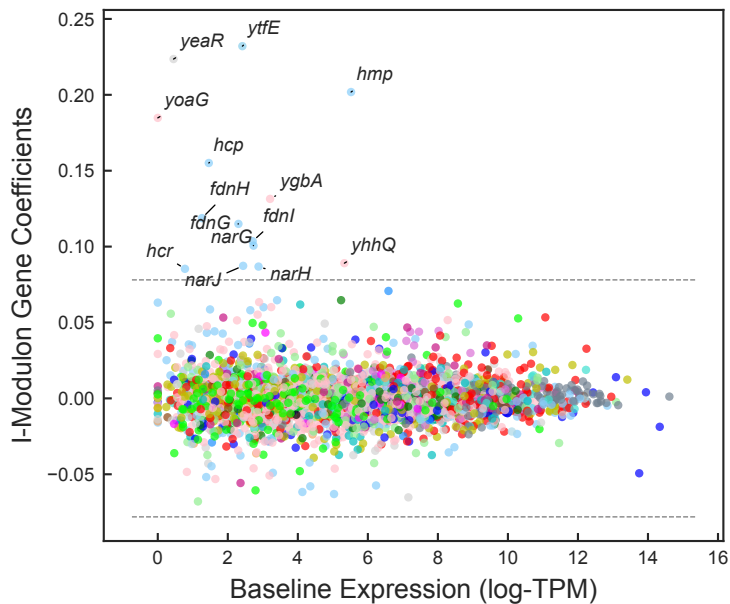

## COG Categories

- Energy production and conversion (9): *fdnG, fdnH, fdnI, hcp, hcr, hmp, narG, narH, narJ*
- Cell cycle control, cell division, chromosome partitioning (1): *ytfE*
- Inorganic ion transport and metabolism (1): *yeaR*
- Function unknown (3): *ygbA, yhhQ, yoaG*

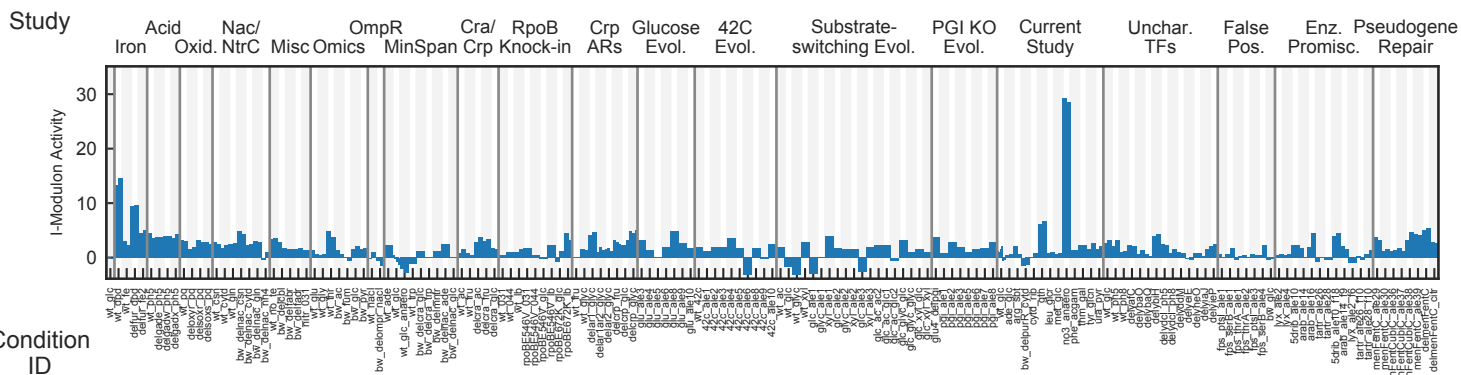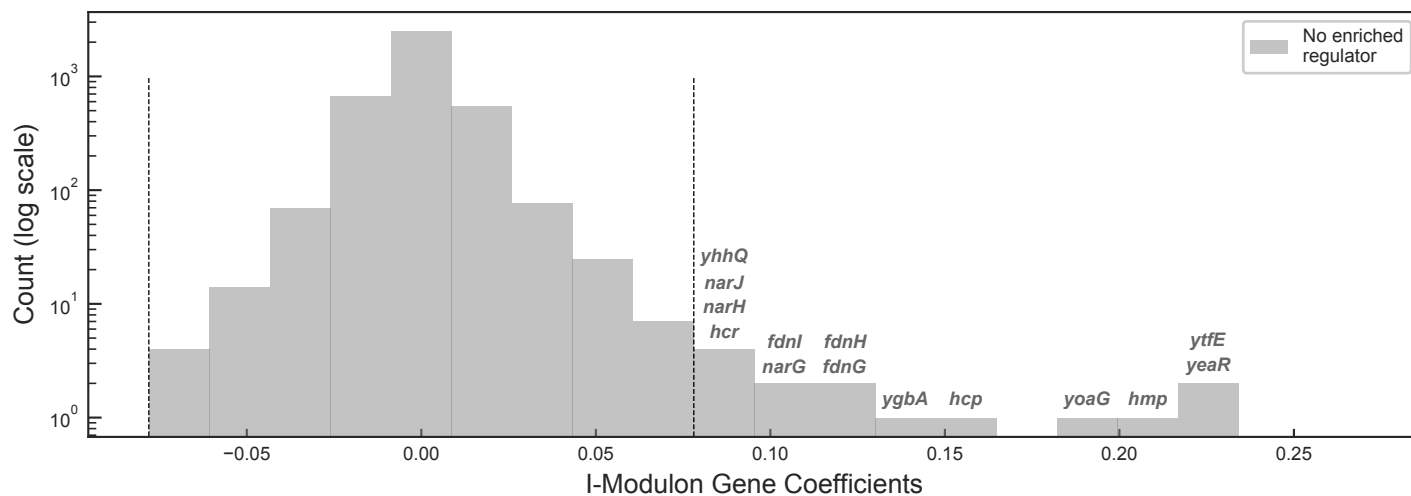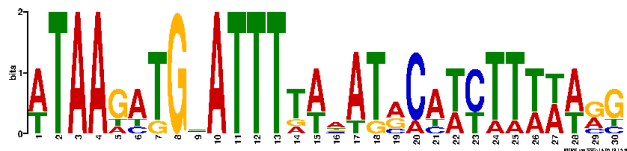

Motif E-value: 5.30e-05  
Operons with Upstream Motif: 75%

# proVWX I-Modulon

Biological Function: Glycine betaine transport

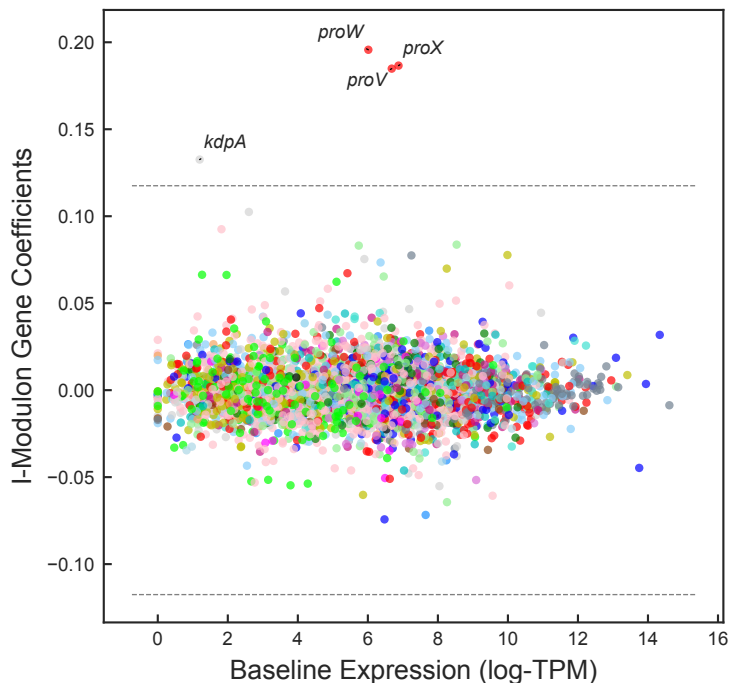

### COG Categories

- Amino acid transport and metabolism (3): *proV*, *proW*, *proX*
- Inorganic ion transport and metabolism (1): *kdpA*

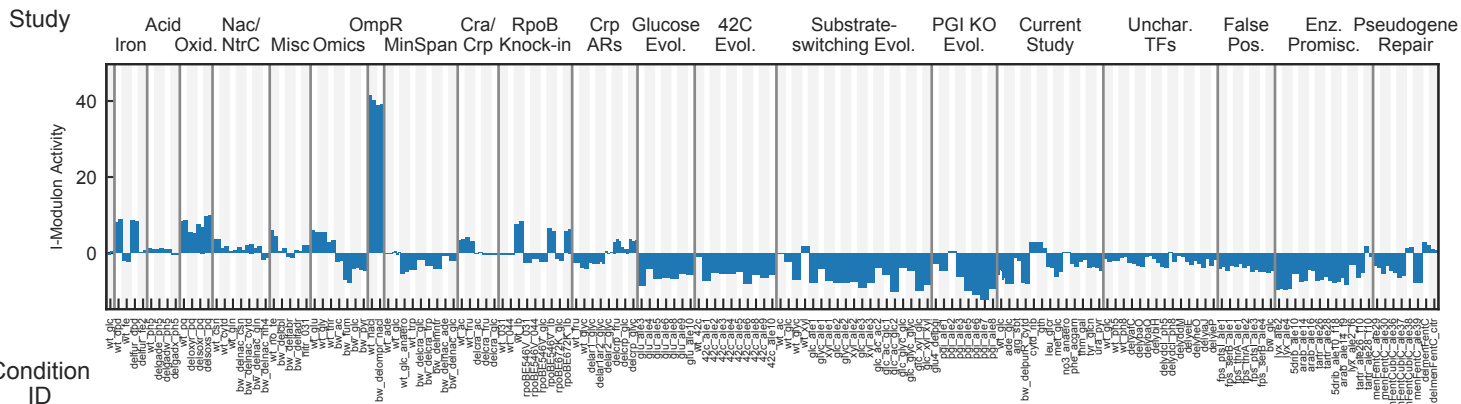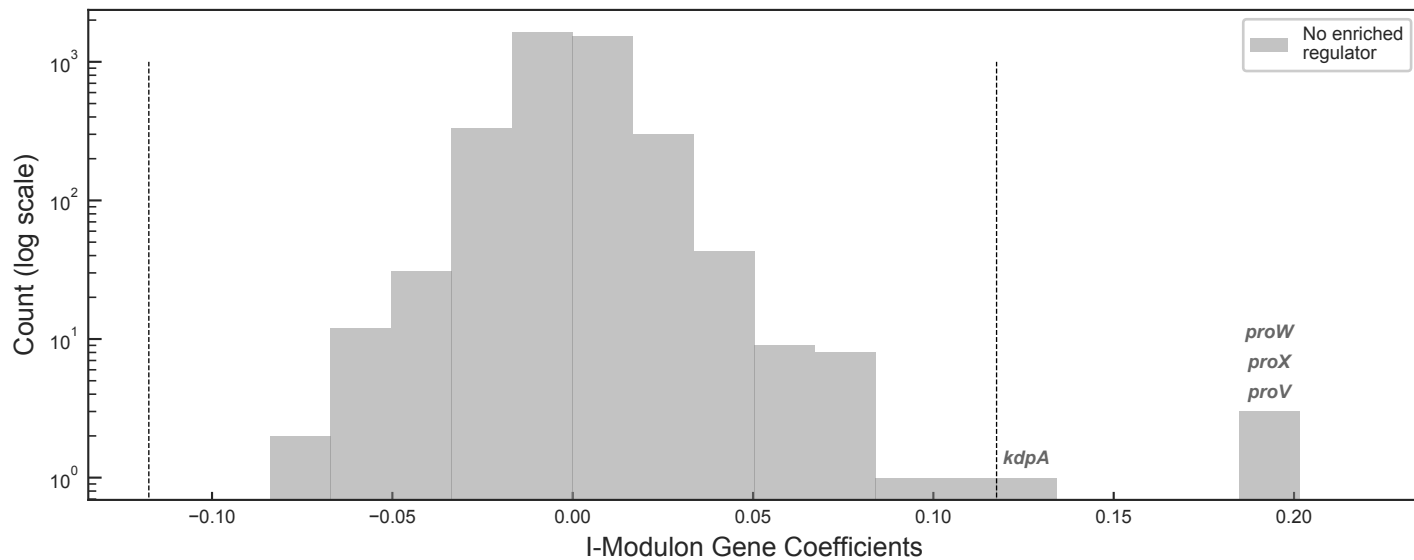



# purR – KO I-Modulon

Biological Function: Accounts for purR knock-out

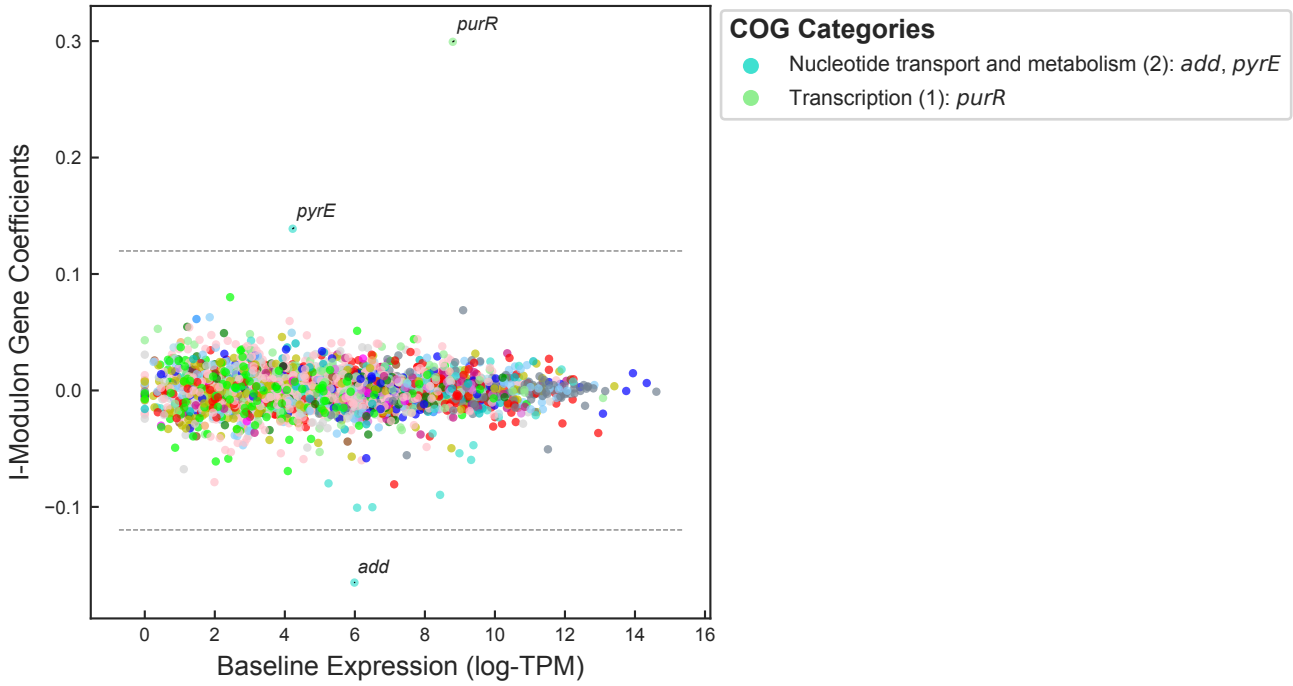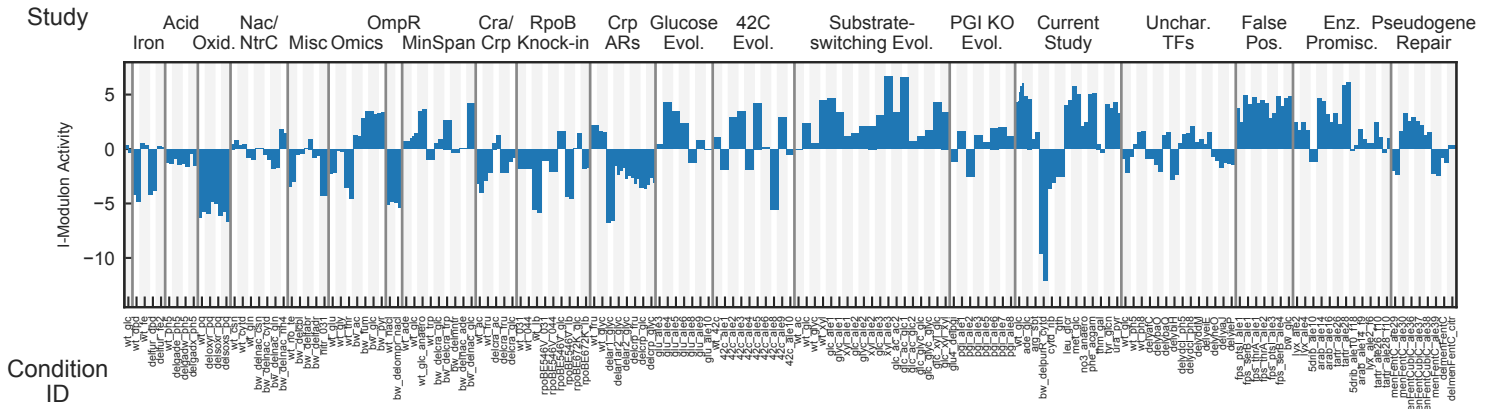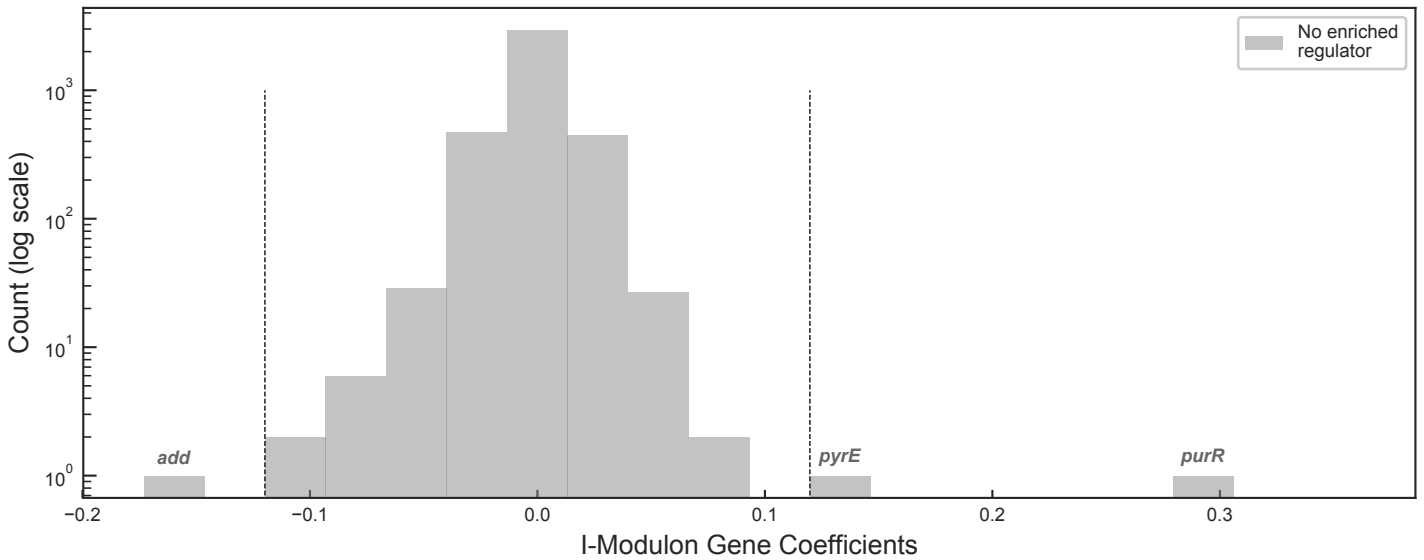

# sgrT I-Modulon

Biological Function: Contains single dominating gene: sgrT

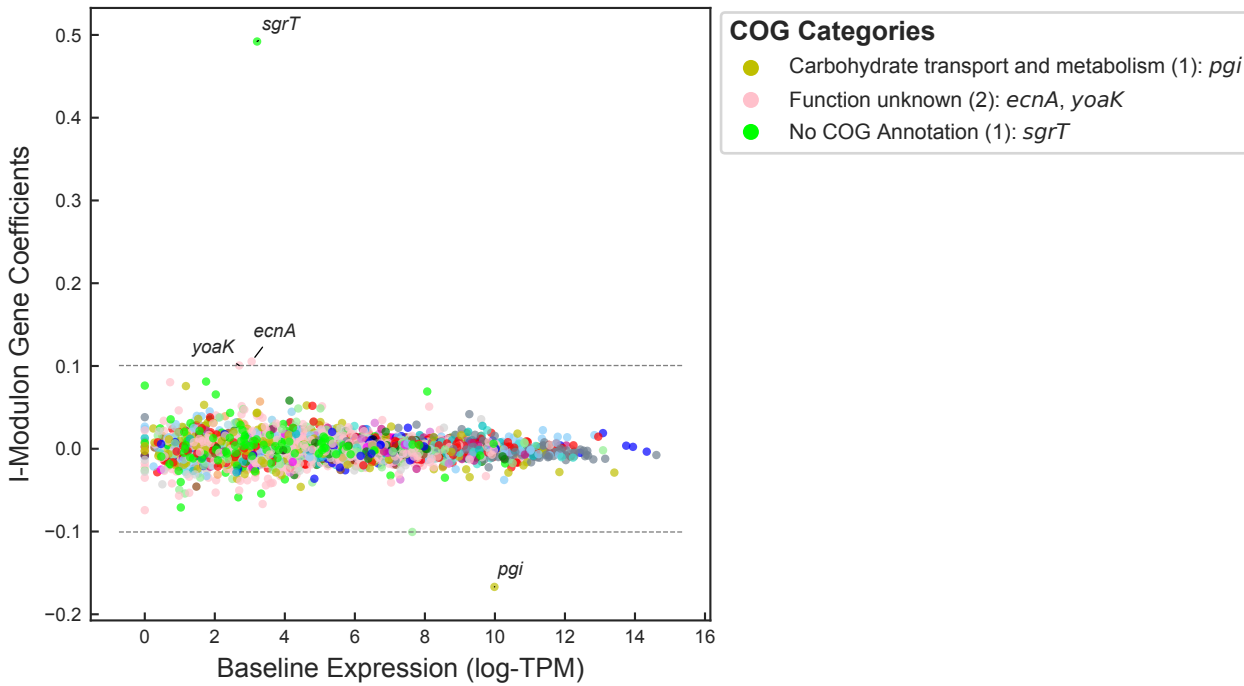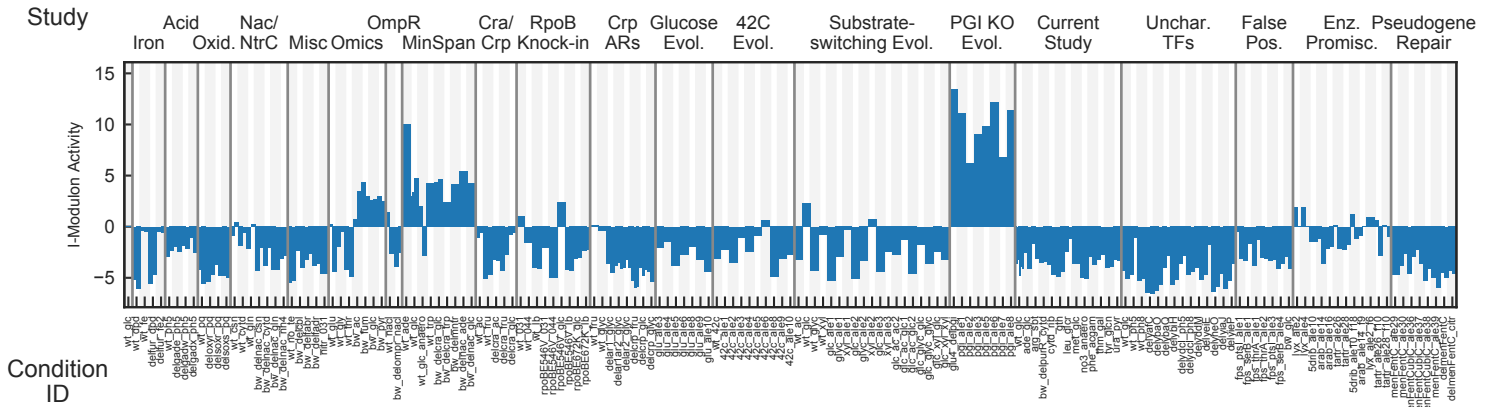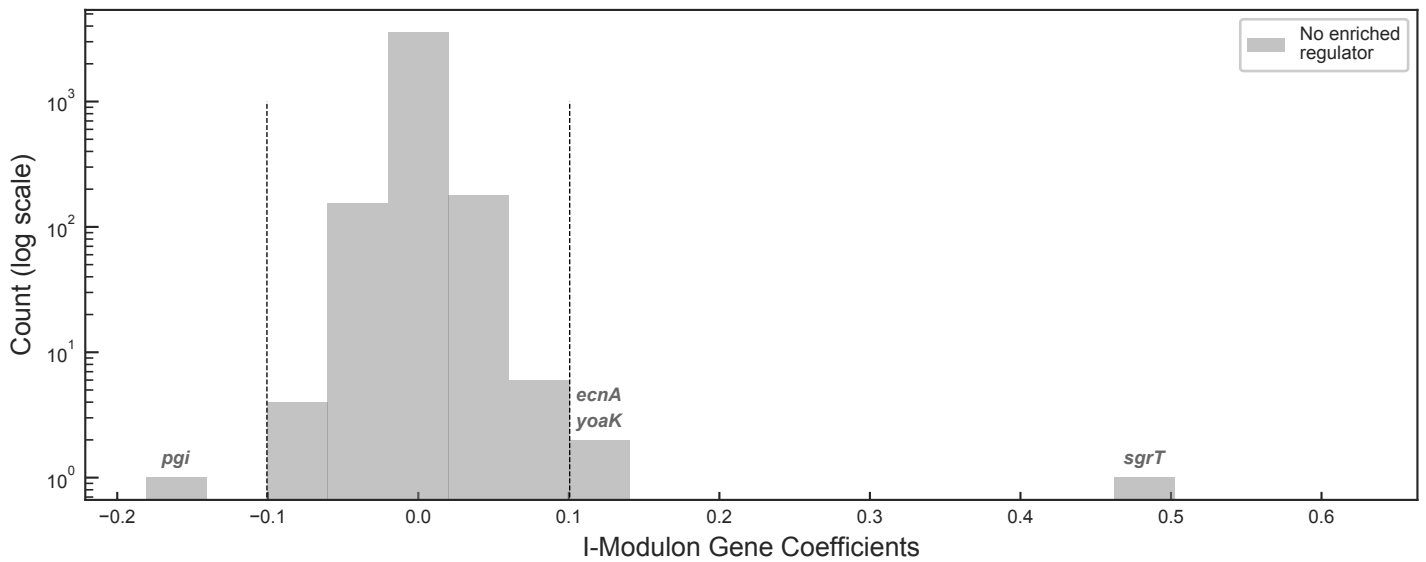

# thrA – KO I-Modulon

Biological Function: Accounts for thrA knock-out

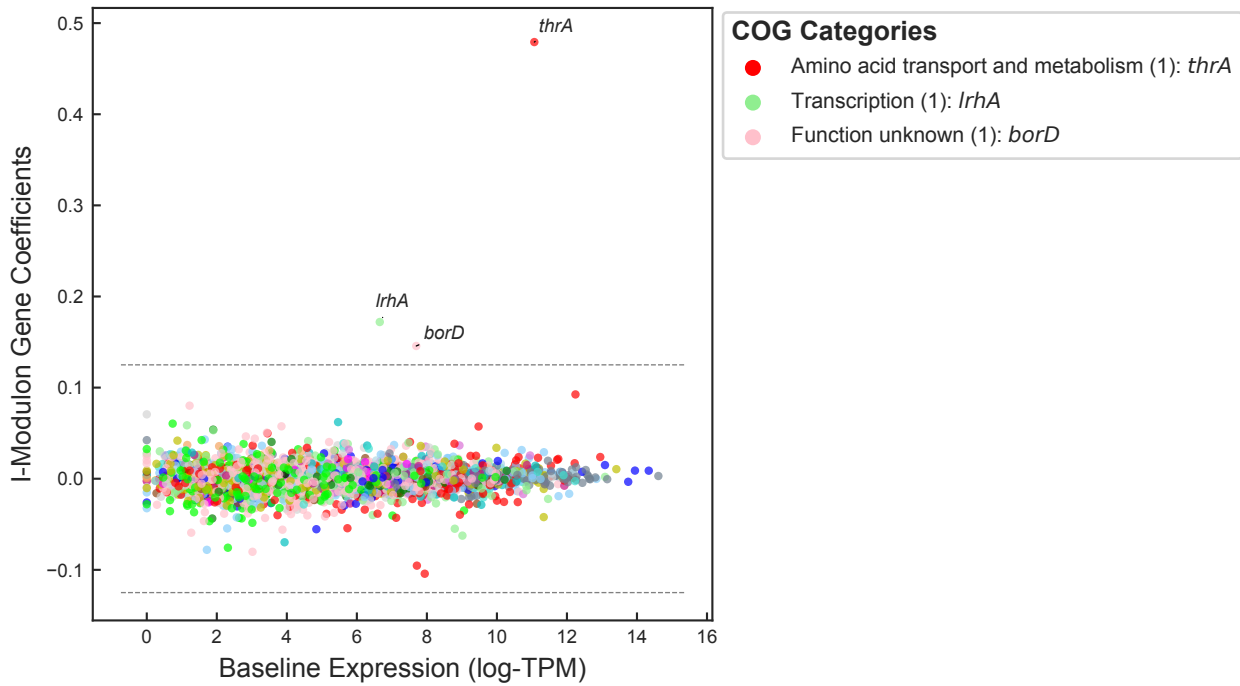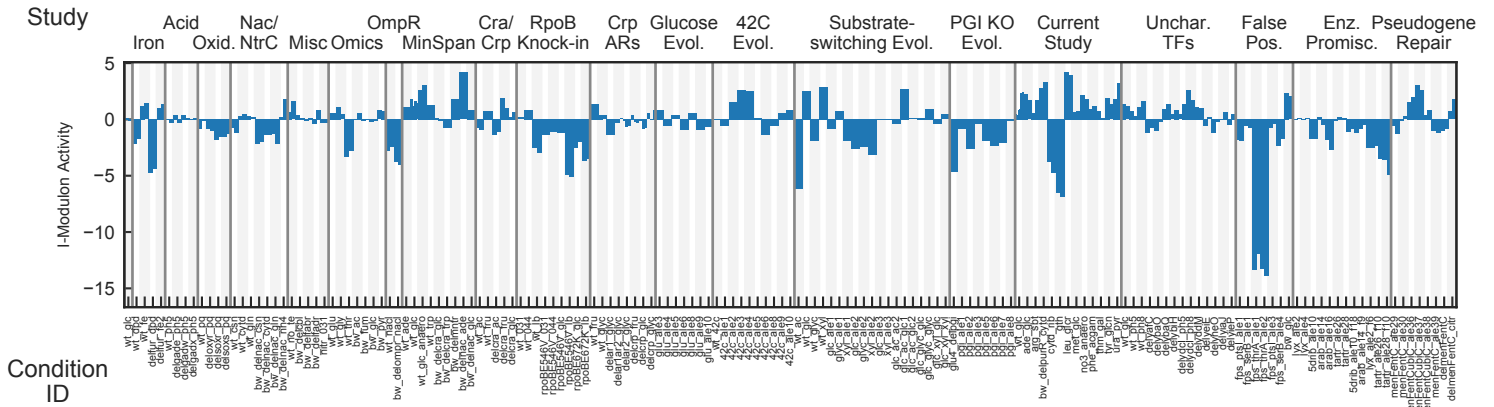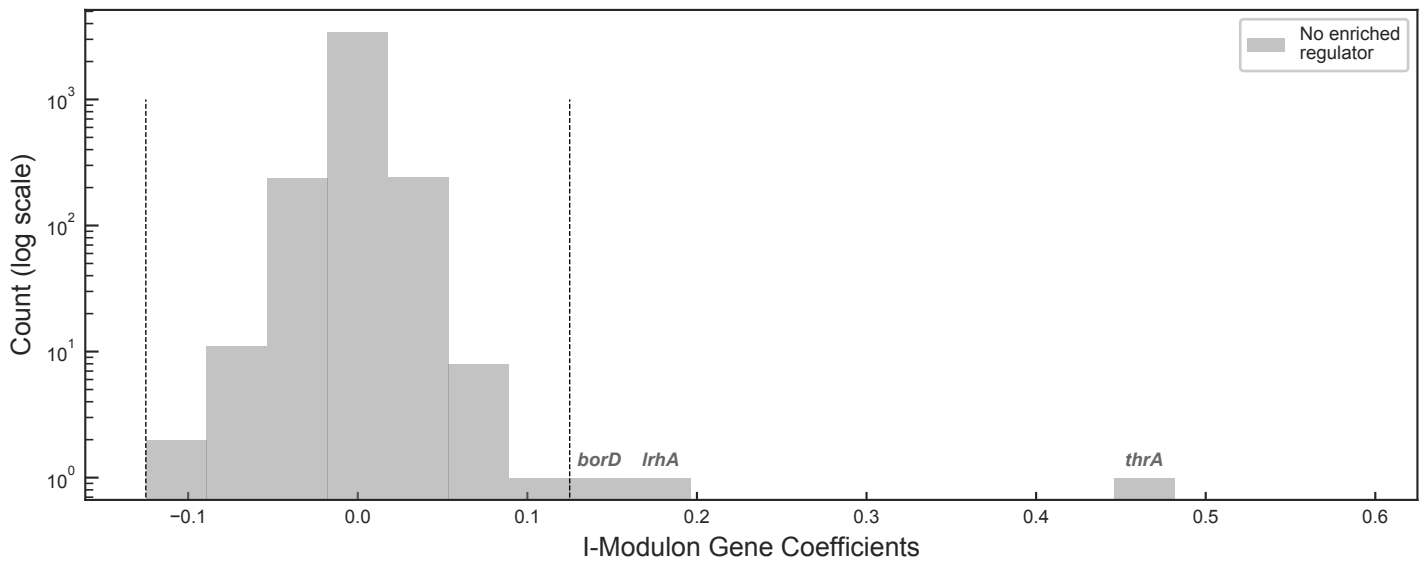

# translation I-Modulon

Biological Function: Enriched in translation machinery

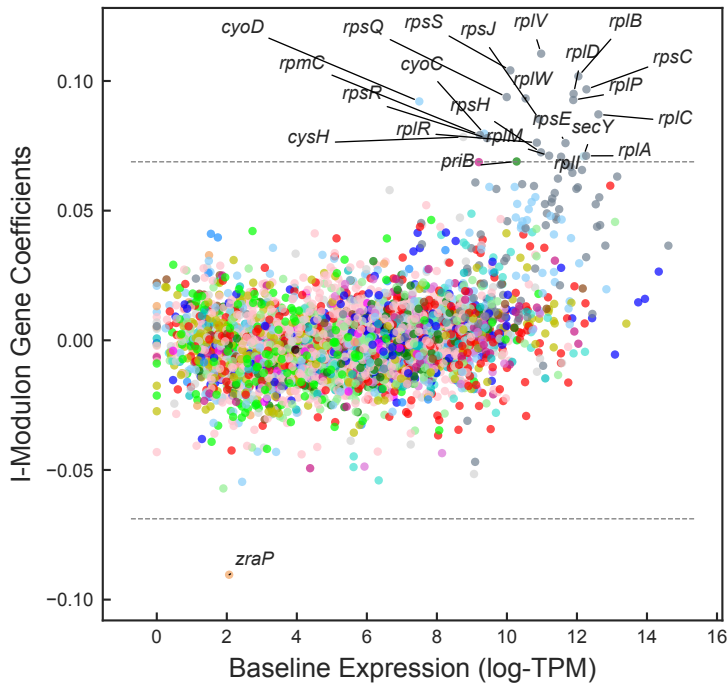

## COG Categories

- Translation, ribosomal structure and biogenesis (18): *rplA*, *rplB*, *rplC*, *rplD*, *rplI*, *rplM*, *rplP*, *rplR*, *rplV*, *rplW*, *rpmC*, *rpsC*, *rpsE*, *rpsH*, *rpsJ*, *rpsQ*, *rpsR*, *rpsS*
- Energy production and conversion (2): *cyoC*, *cyoD*
- Cell motility (1): *zraP*
- Inorganic ion transport and metabolism (1): *cysH*
- Intracellular trafficking, secretion, and vesicular transport (1): *secY*
- Replication, recombination and repair (1): *priB*

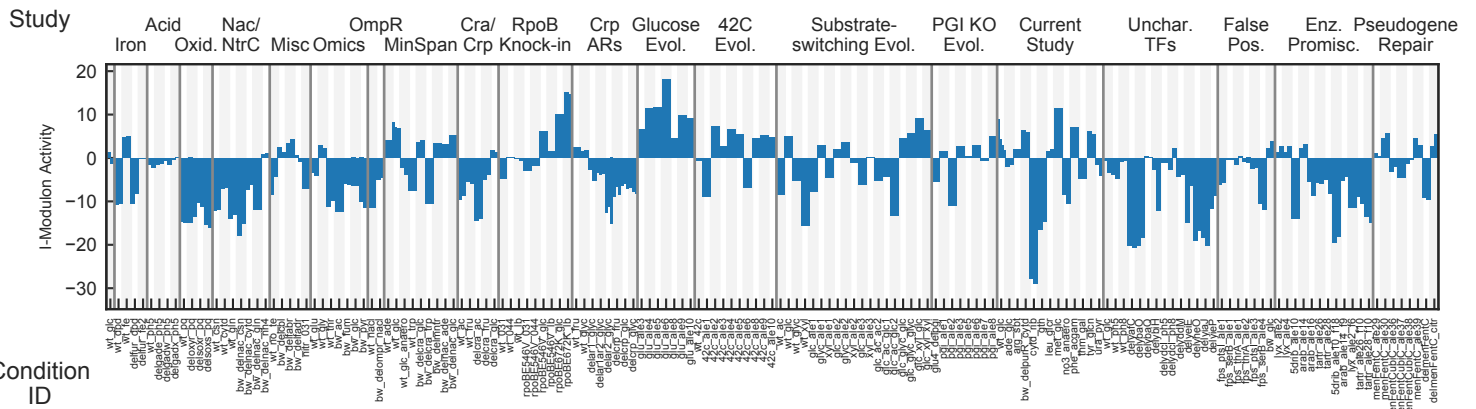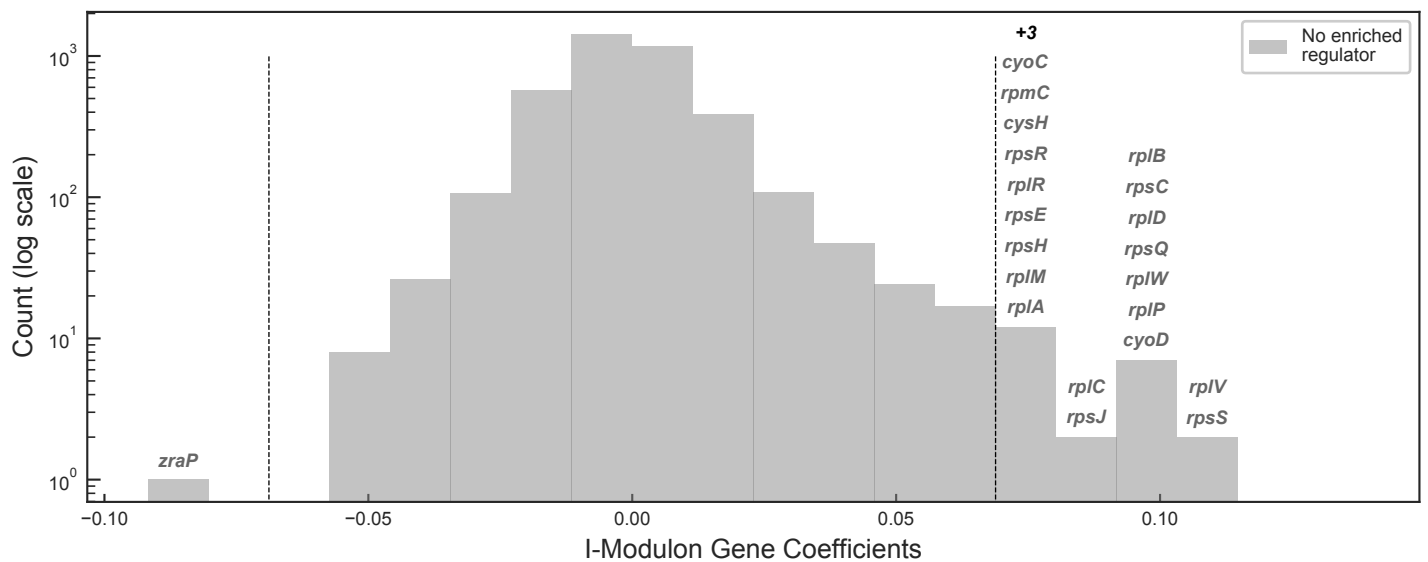

# ydcl – KO I-Modulon

Biological Function: Accounts for *ydcl* knock-out

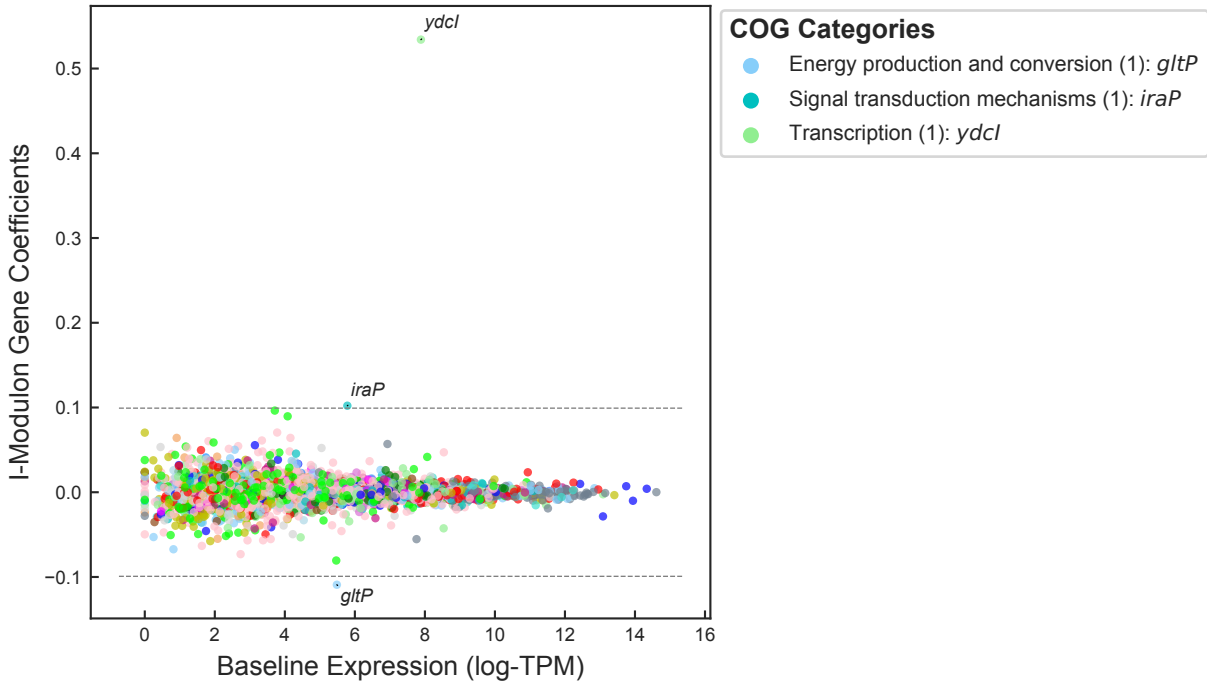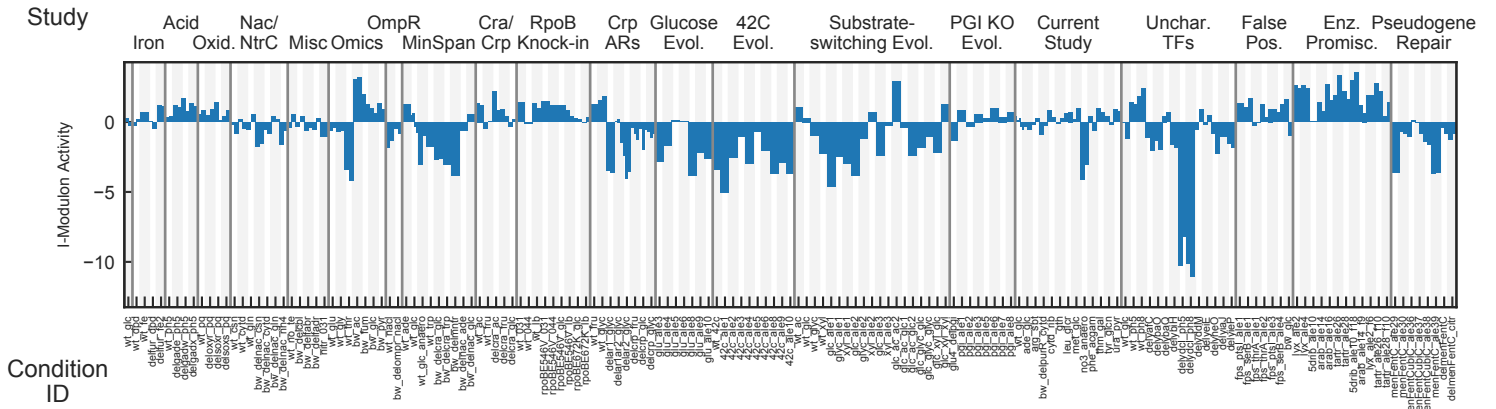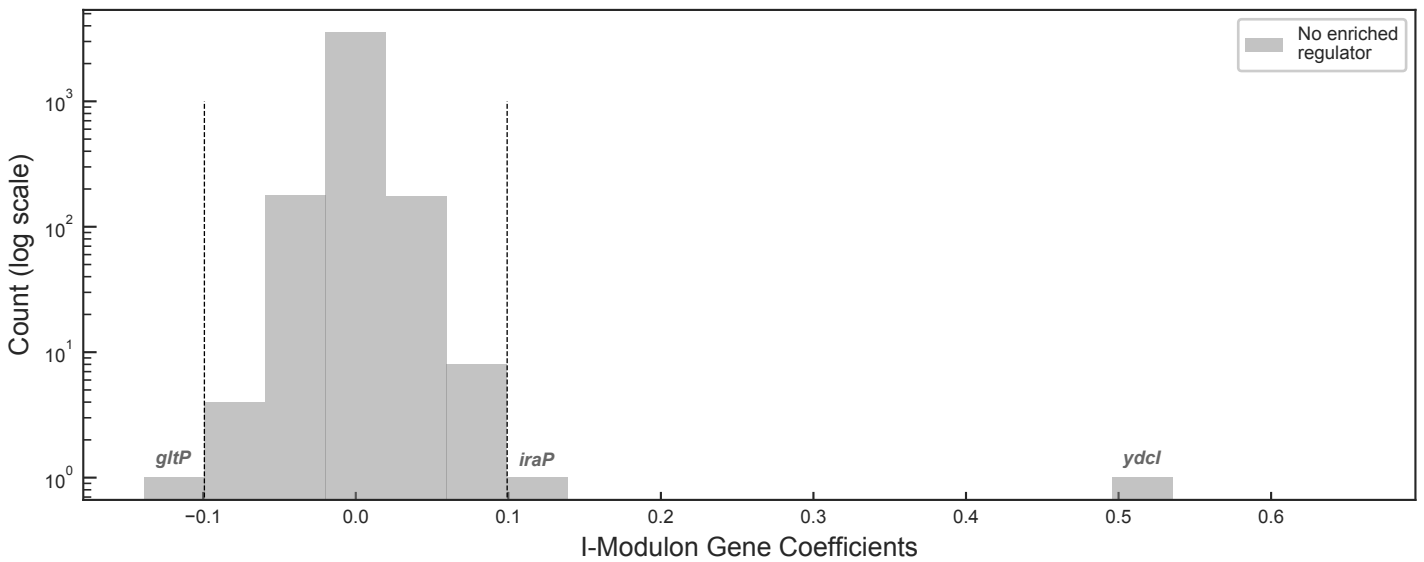

# yheO – KO I-Modulon

Biological Function: Accounts for yheO knock-out

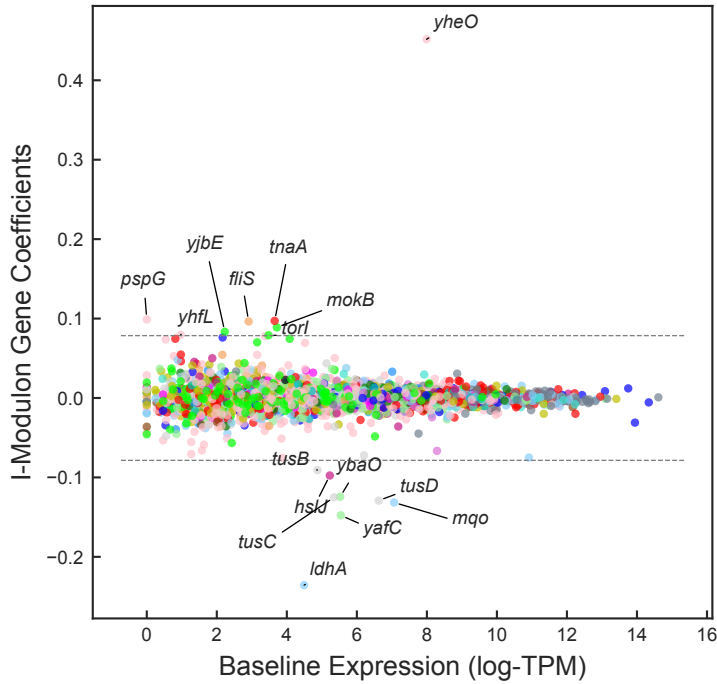

## COG Categories

- Inorganic ion transport and metabolism (3): *tusB*, *tusC*, *tusD*
- Energy production and conversion (2): *ldhA*, *mqo*
- Transcription (2): *yafC*, *ybaO*
- Amino acid transport and metabolism (1): *tnaA*
- Cell motility (1): *fliS*
- Posttranslational modification, protein turnover, chaperones (1): *hslJ*
- Function unknown (3): *pspG*, *yheO*, *yhfL*
- No COG Annotation (3): *mokB*, *torl*, *yjbE*

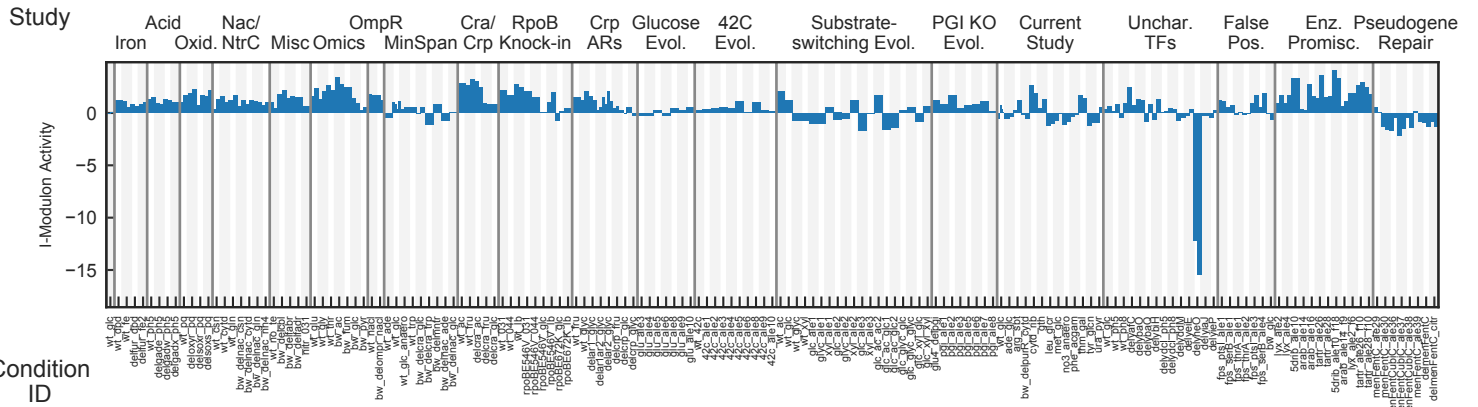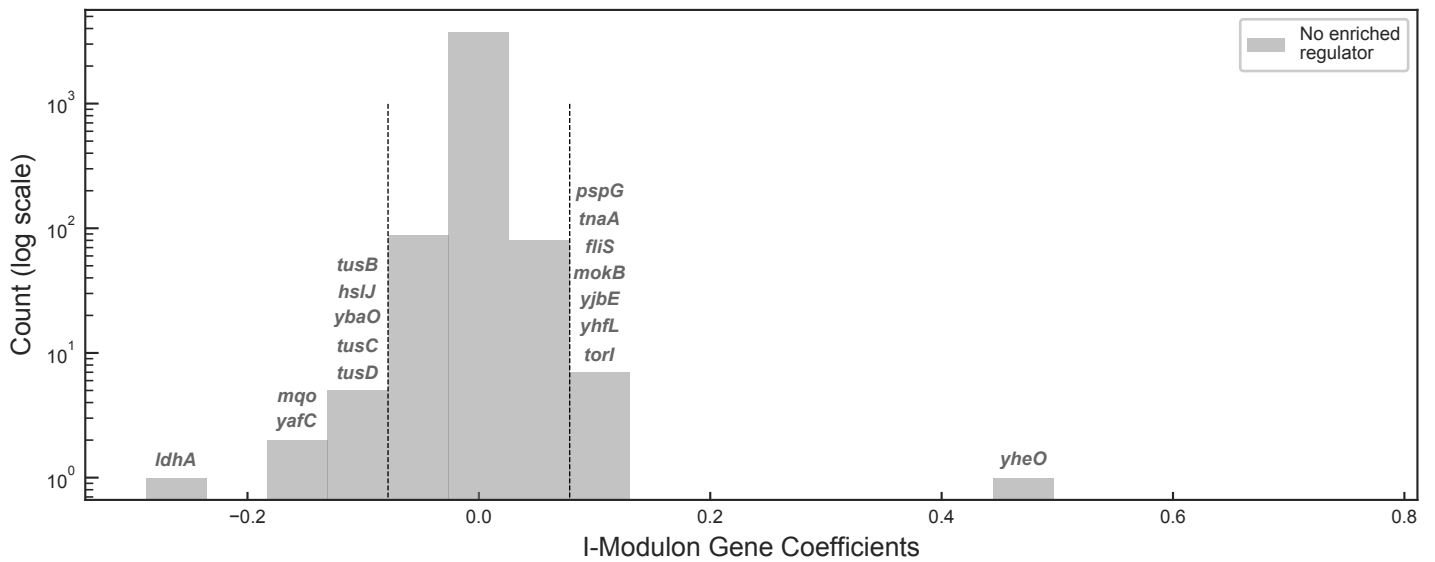

# Uncharacterized I-Modulon #1

Biological Function: Unknown Function

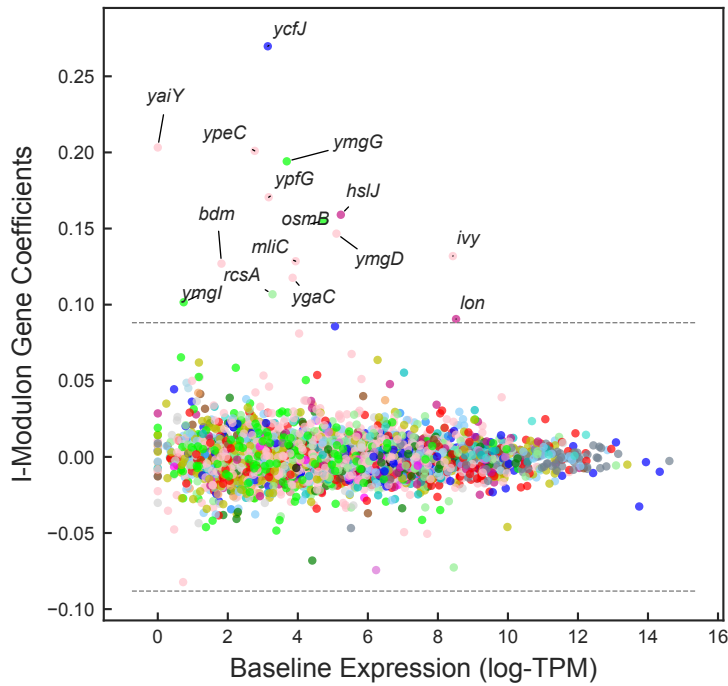

## COG Categories

- Posttranslational modification, protein turnover, chaperones (2): *hslJ*, *lon*
- Cell wall/membrane/envelope biogenesis (1): *ycfJ*
- Transcription (1): *rcsA*
- Function unknown (8): *bdm*, *ivy*, *mliC*, *yaiY*, *ygaC*, *ymgD*, *ypeC*, *ypfG*
- No COG Annotation (3): *osmB*, *ymgG*, *ymgl*

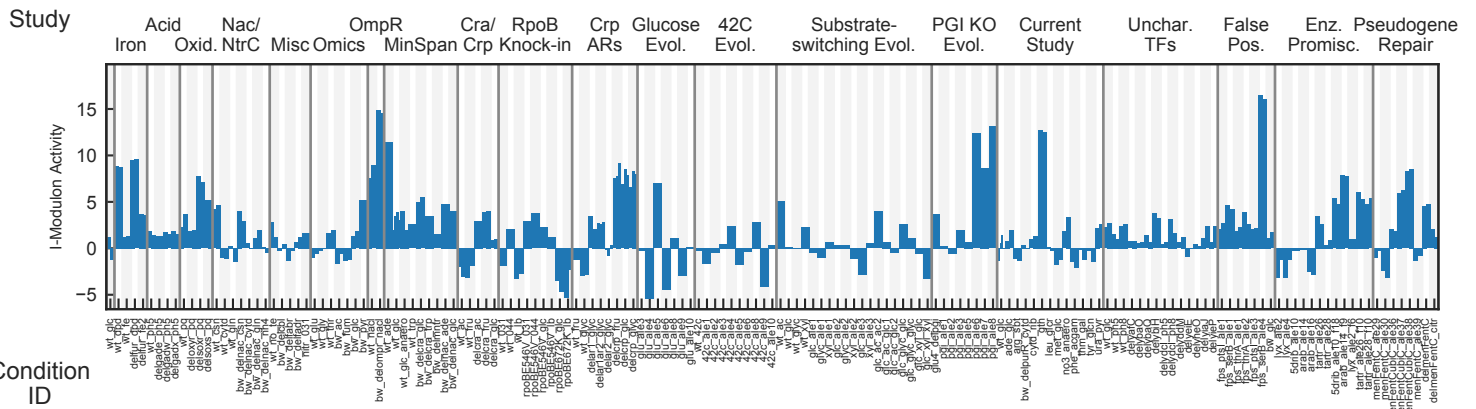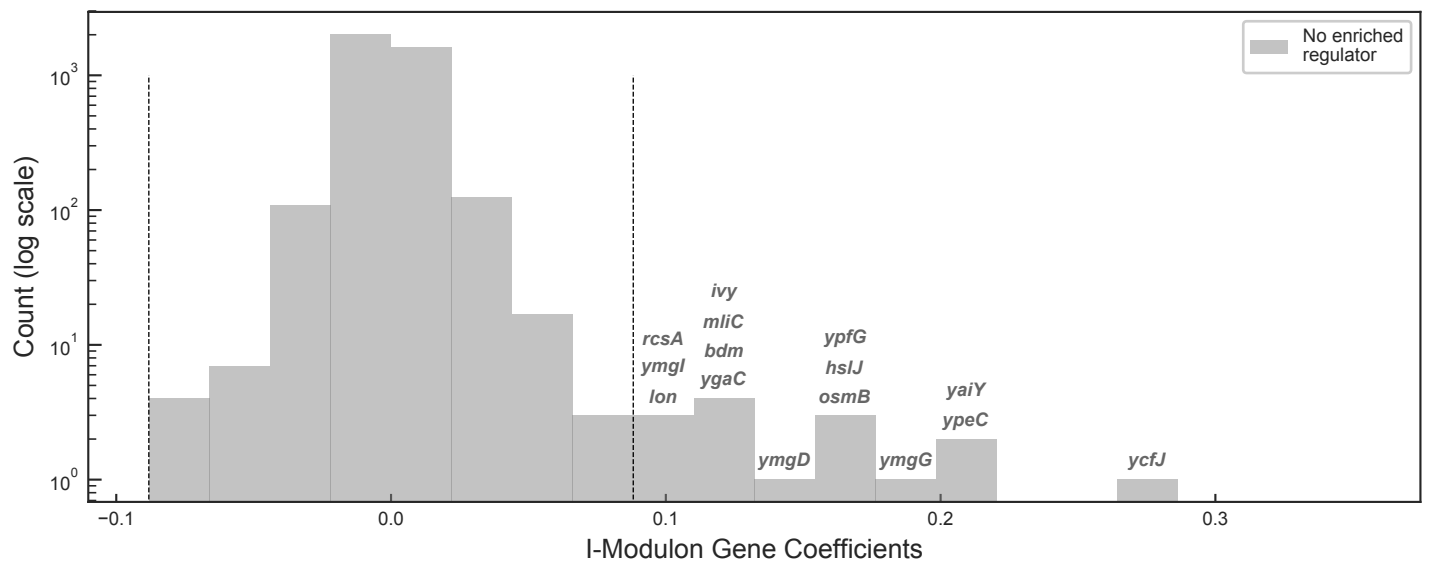

# Uncharacterized I-Modulon #2

Biological Function: Unknown Function

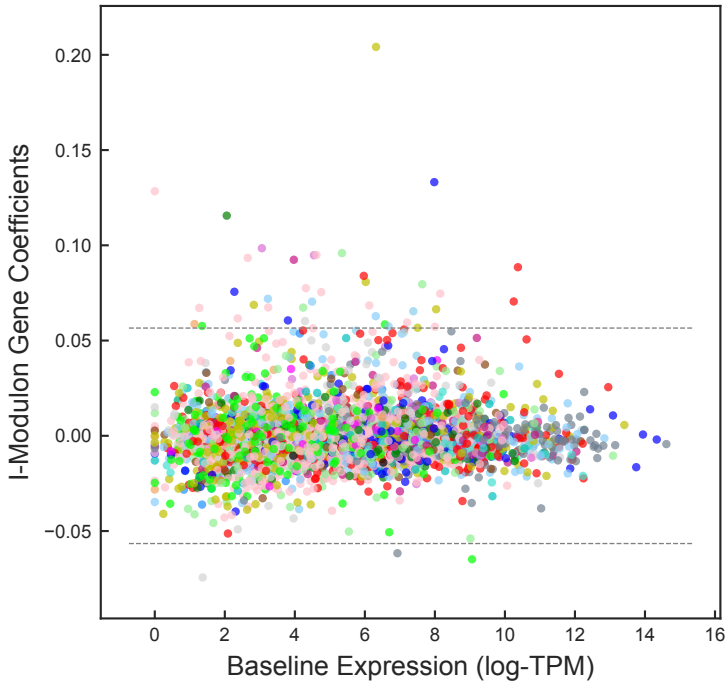

## COG Categories

- Carbohydrate transport and metabolism (5): *glk, rbsD, xylB, ybhC, yeaD*
- Amino acid transport and metabolism (3): *asnA, aspC, livJ*
- Cell wall/membrane/envelope biogenesis (3): *nlpD, ompW, yiaT*
- Energy production and conversion (3): *ldhA, nuoJ, nuoK*
- Transcription (3): *ascG, cra, nsrR*
- Other (25): *ftsE, mrp, cobS, cobT, mdtI, potH, yggR, queE, yjjV, rpmH, erpA, ghxP, menH, sfsA, ydfZ, ydgH, yfiM, ygbE, yggN, yhjR + 5*

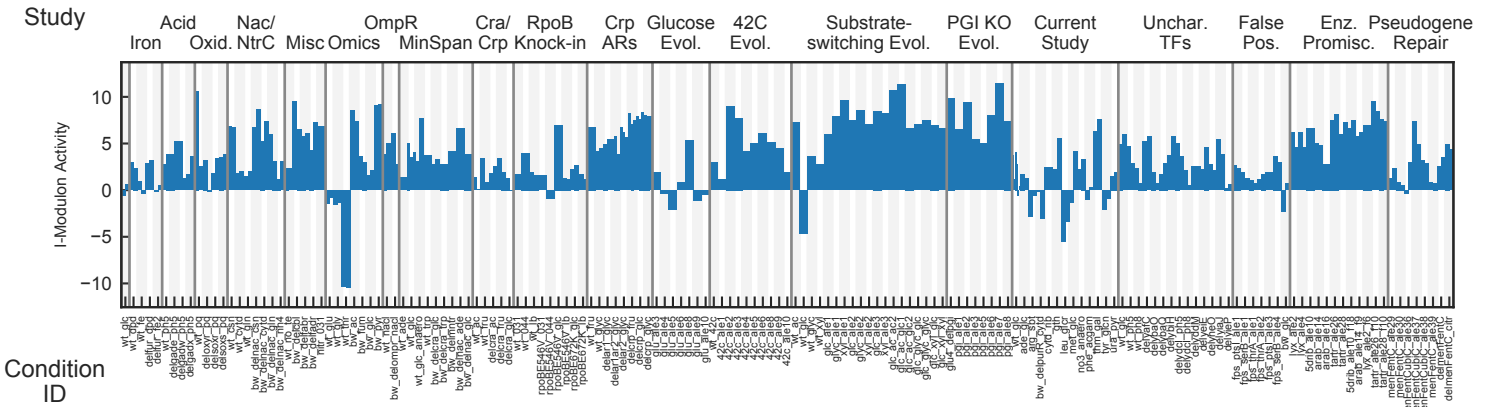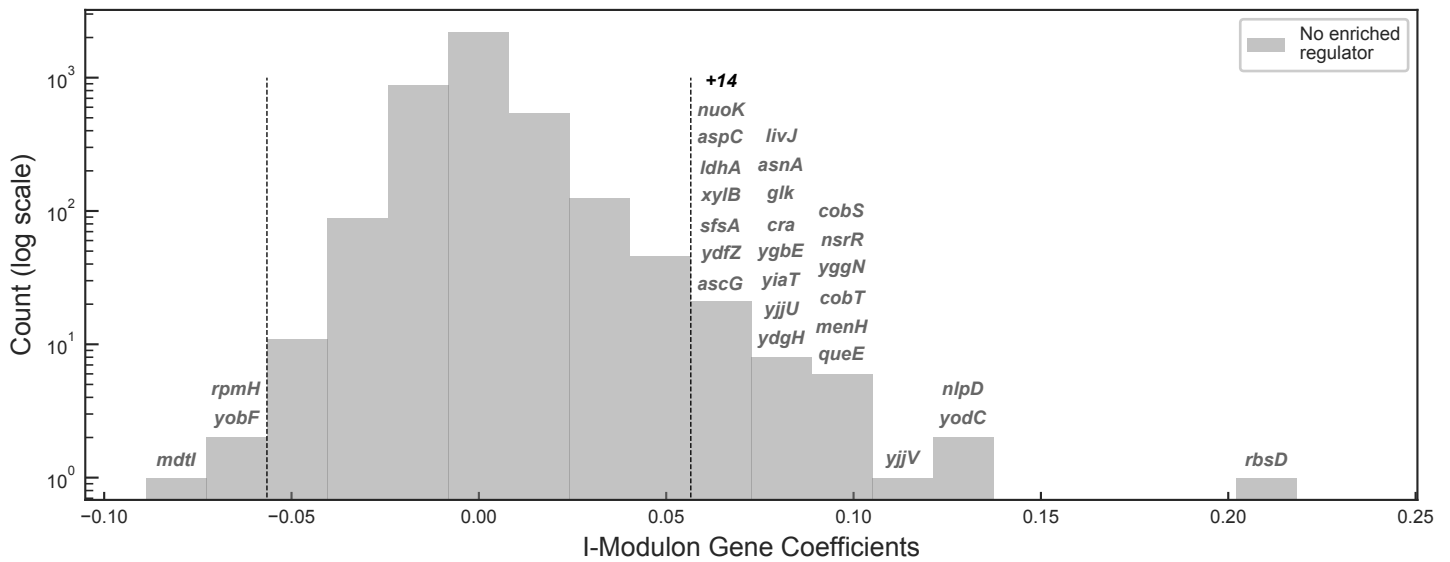



# Uncharacterized I-Modulon #3

Biological Function: Unknown Function

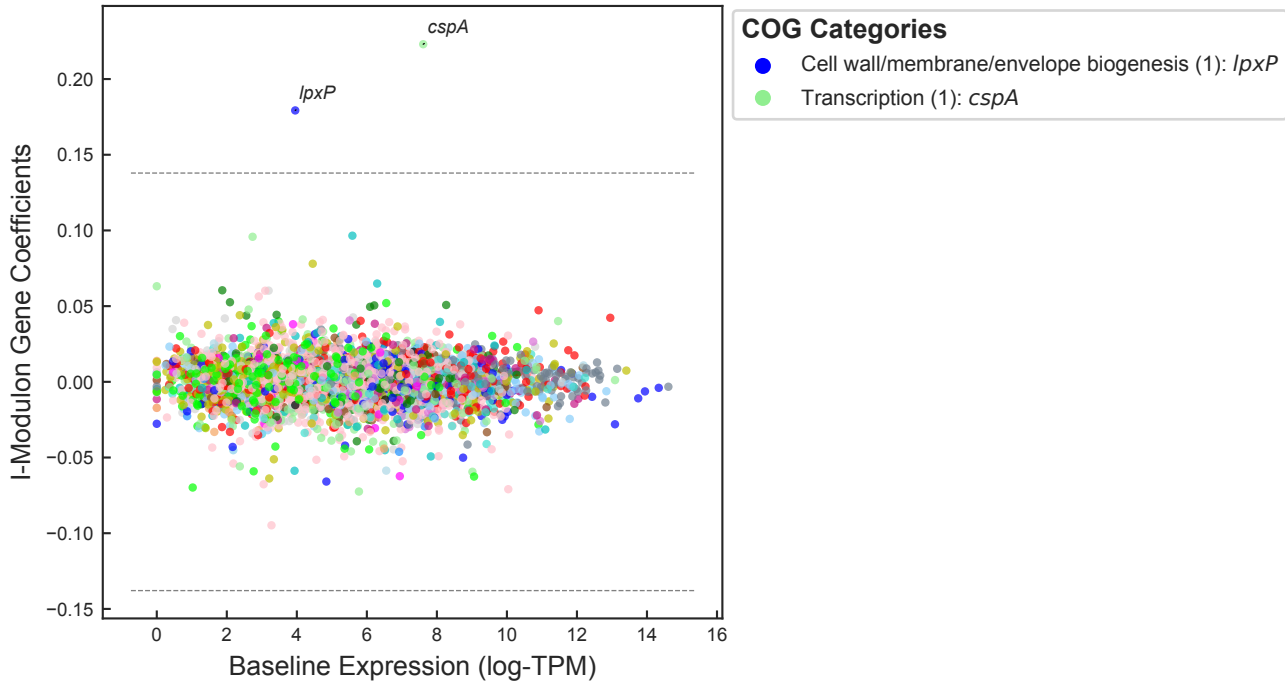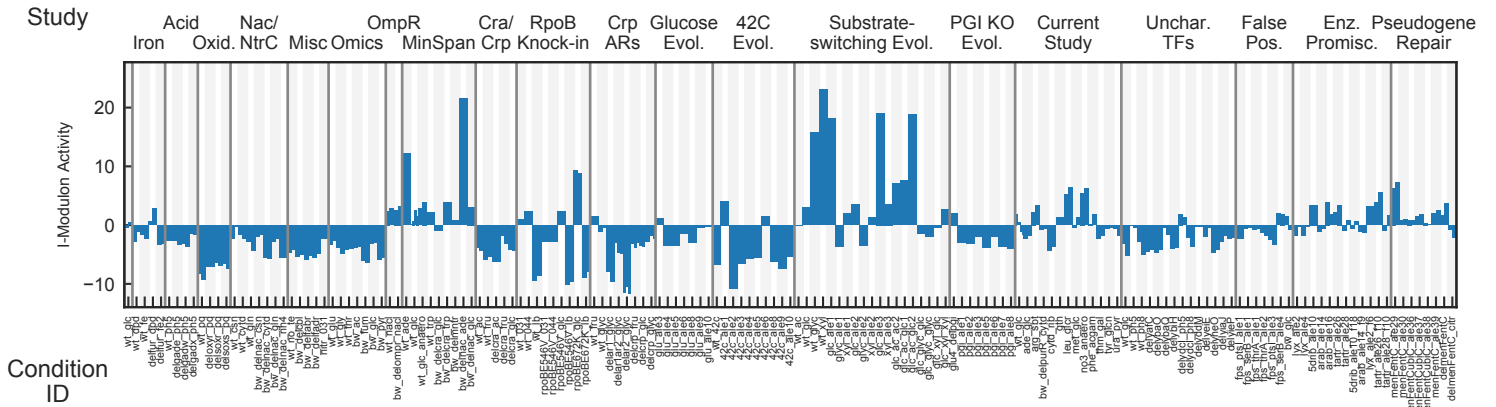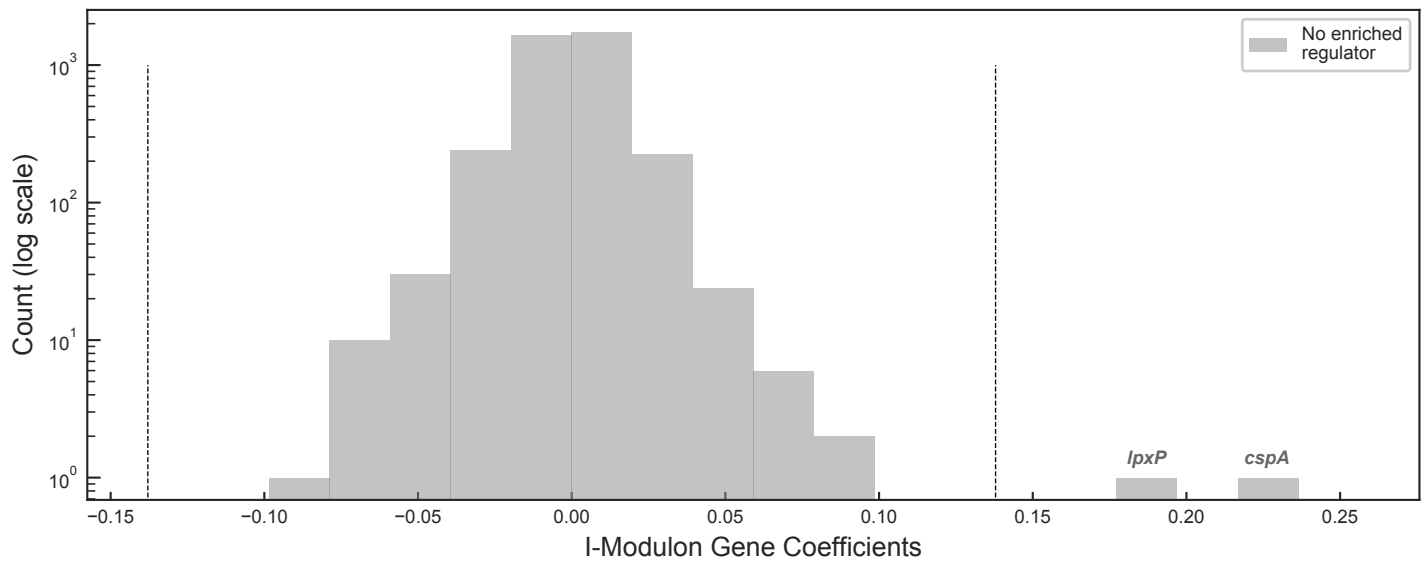



# Uncharacterized I-Modulon #5

Biological Function: Unknown Function

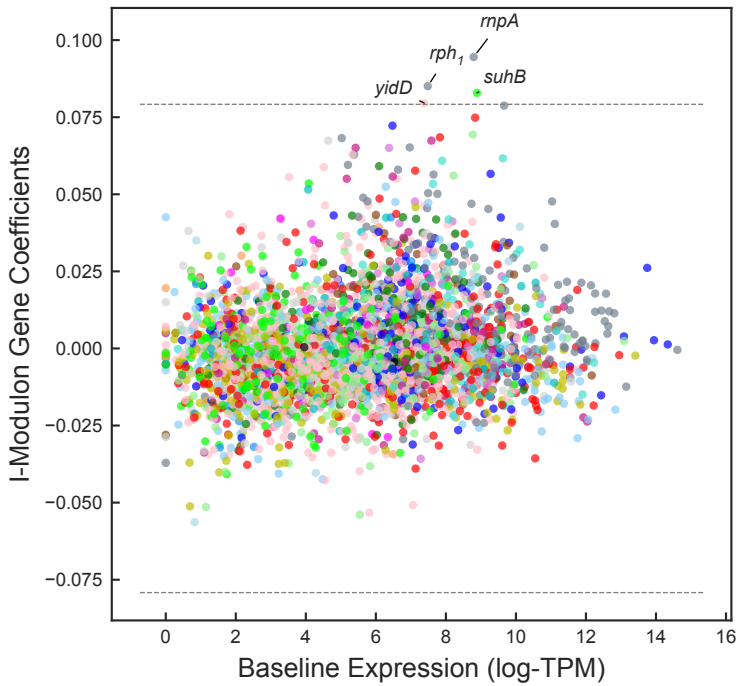

## COG Categories

- Translation, ribosomal structure and biogenesis (2): *rnpA*, *rph1*
- Function unknown (1): *yidD*
- No COG Annotation (1): *suhB*

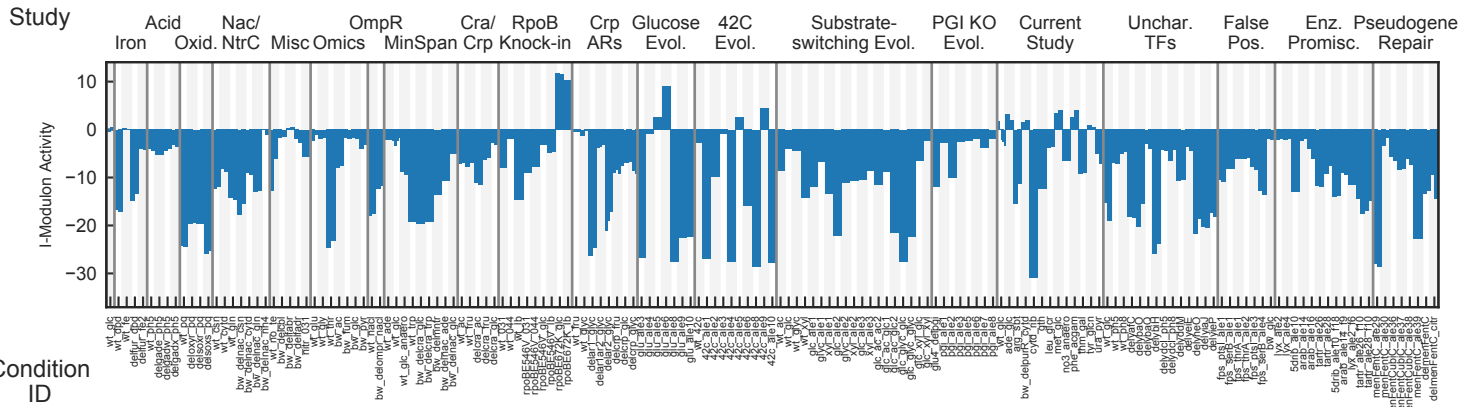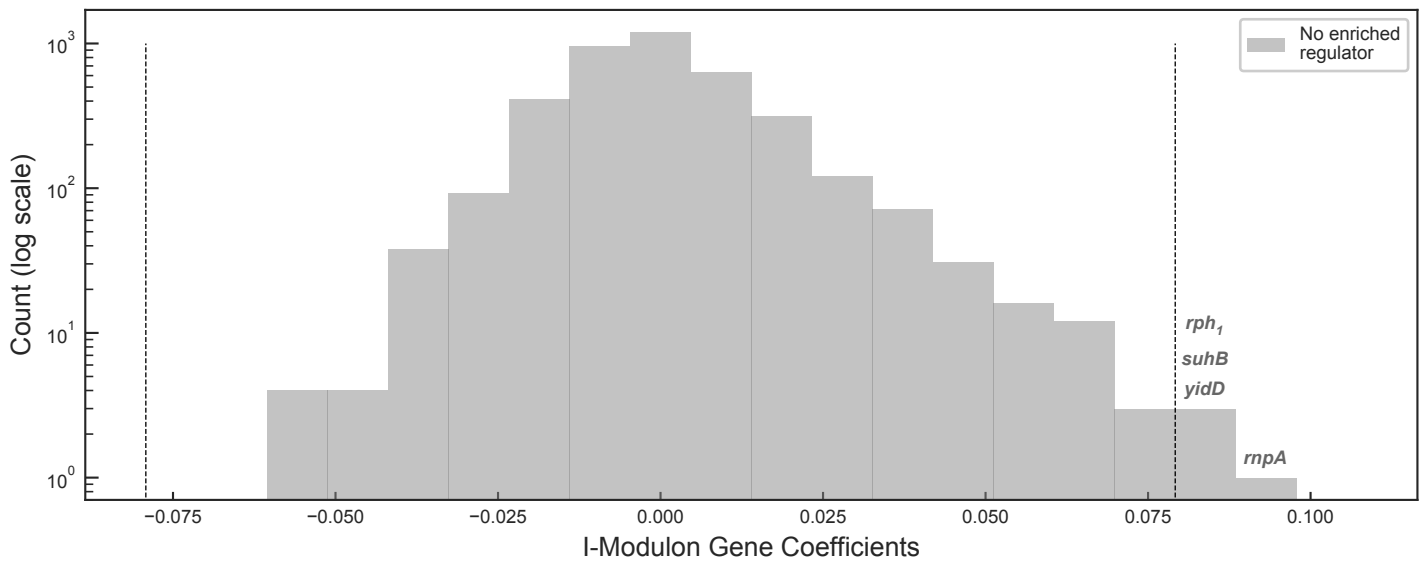

# Uncharacterized I-Modulon #6

Biological Function: Unknown Function

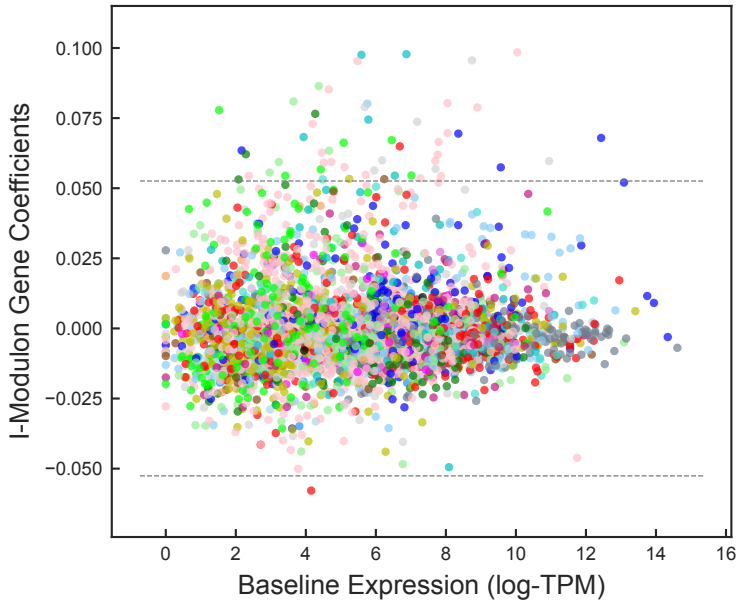

## COG Categories

- Inorganic ion transport and metabolism (7): *chaA*, *dps*, *ftnA*, *ftnB*, *nlpA*, *ybjL*, *yffB*
- Signal transduction mechanisms (5): *bluF*, *iraP*, *uspD*, *yahA*, *yedW*
- Transcription (5): *cadC*, *ybcM*, *ycaN*, *yhjB*, *yidL*
- Cell wall/membrane/envelope biogenesis (4): *mepS*, *ompT*, *slp*, *yhdV*
- Other (33): *casE*, *fimE*, *xisE*, *nanA*, *proV*, *mdfA*, *zapC*, *ybjG*, *adeD*, *borD*, *cbrC*, *ecpA*, *hchA*, *hdeD*, *hdhA*, *iap*, *pptA*, *stpA*, *yagU*, *yahO* + 13

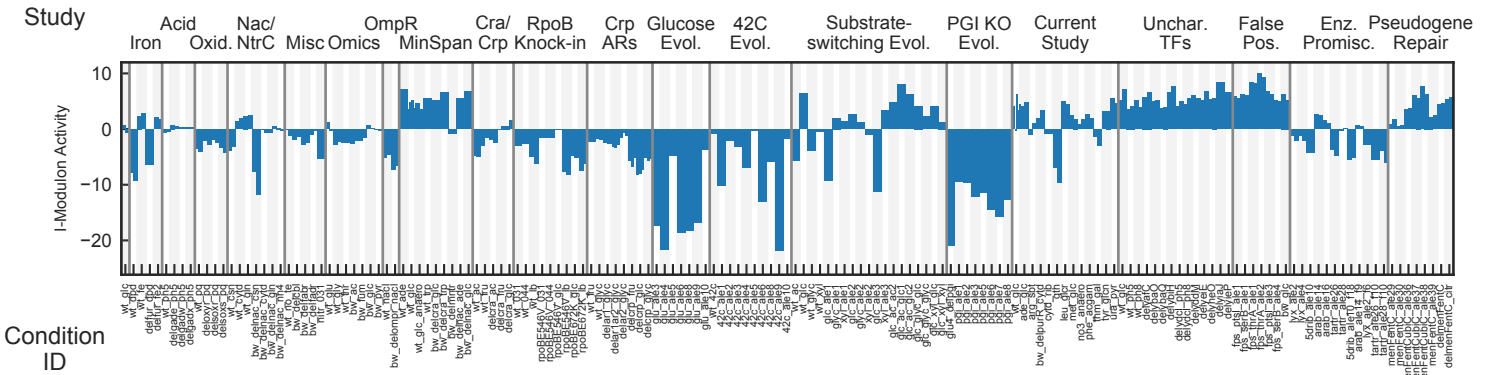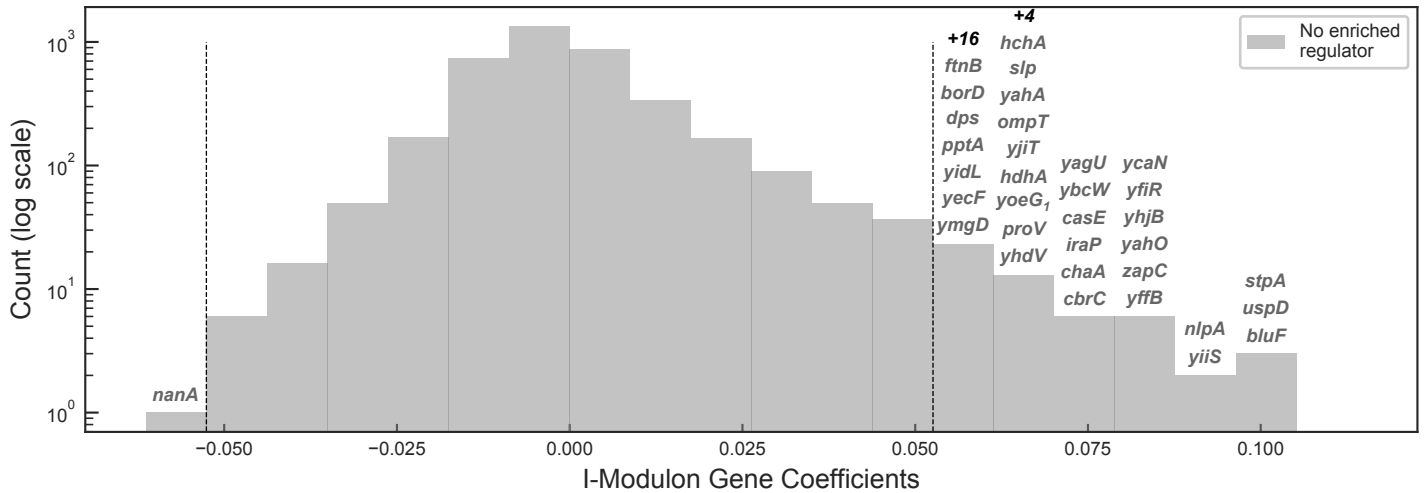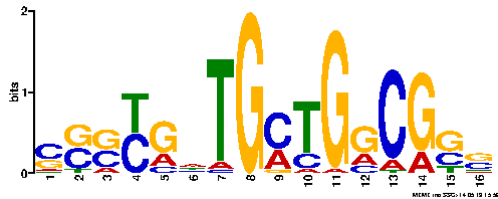

Motif E-value: 1.30e-05  
Operons with Upstream Motif: 53%
